# Supplementary material for: Iridium-catalyzed regio- and enantioselective allylic esterification of secondary allylic alcohols with carboxylic acids
Source: Royal Society of Chemistry journal article supplement (doi:10.1039/d1cc04861a), 2021-01-01

## Supporting Information

### **Iridium-Catalyzed Regio- and Enantioselective Allylic Esterification of Secondary Allylic Alcohols with Carboxylic Acids**

Shengbiao Tang,\* Peng Zhang, Changkai Wang, Ying Shao and Jiangtao Sun\*

Jiangsu Key Laboratory of Advanced Catalytic Materials & Technology, School of Petrochemical  
Engineering, Changzhou University, Changzhou 213164, China

E-mail: shengbiaotang@cczu.edu.cn; jtsun@cczu.edu.cn.

## Table of content

|                                                                   |          |
|-------------------------------------------------------------------|----------|
| <b>General information</b> .....                                  | S3       |
| <b>General procedure for synthesis of allylic alcohols</b> .....  | S3       |
| <b>Table S1. Detailed optimization of conditions</b> .....        | S5       |
| <b>General procedure for preparation of chiral esters 3</b> ..... | S6-S29   |
| <b>Further transformation</b> .....                               | S30      |
| <b>References</b> .....                                           | S31      |
| <b>HPLC Chromatograms</b> .....                                   | S32-S61  |
| <b>NMR Spectra</b> .....                                          | S62-S133 |

## General information

All reactions were carried out using an oven-dried tube with magnetic stirring under an argon atmosphere unless otherwise noted. Anhydrous solvents were dried prior to use. Reagents were purchased from Energy Chemical and used without further purification. For column chromatography, 200-300 mesh silica gel was used. Thin layer chromatography (TLC) was performed on Silicycle 250 $\mu$ m silica gel 60Å plates. Visualization was accomplished with UV light (254 nm), Iodine, or Potassium Permanganate.

<sup>1</sup>H NMR and <sup>13</sup>C NMR spectra were recorded on a Bruker 300 MHz (300 MHz for <sup>1</sup>H; 282 MHz for <sup>19</sup>F; 75 MHz for <sup>13</sup>C) or 400 MHz (400 MHz for <sup>1</sup>H; 376 MHz for <sup>19</sup>F; 100 MHz for <sup>13</sup>C) spectrometers at ambient temperature. The chemical shifts ( $\delta$ ) are given in parts per million relative to CDCl<sub>3</sub> (7.26 ppm for <sup>1</sup>H) or TMS (0 ppm for <sup>1</sup>H) and CDCl<sub>3</sub> (77.16 ppm for <sup>13</sup>C). Coupling constants (*J*) are reported in Hz, and multiplicity is described using the following abbreviations: s = singlet, d = doublet, t = triplet, q = quartet, m = multiplet, br = broad, or combinations thereof. HRMS were performed on Agilent 6540 Q-TOF mass spectrometer (ESI).

## General procedure for synthesis of allylic alcohols

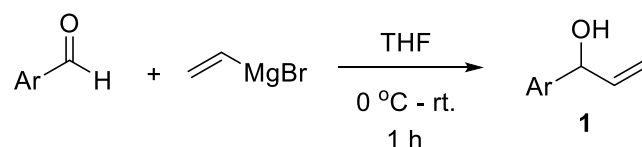

To a round bottomed flask was charged with corresponding aldehydes (2 mmol, 1 equiv) in THF (10 mL), and cooled to 0 °C. Vinylmagnesium bromide (3 mmol, 1.5 equiv) was added slowly to the solution. The reaction then was stirred and warm to room temperature for 1 hour. After the raw aldehyde was disappeared, the solution was quenched with NH<sub>4</sub>Cl (sat. aqueous). The aqueous layer was extracted three times with EtOAc. The combined organic layers were washed with brine, dried over Na<sub>2</sub>SO<sub>4</sub>, and concentrated to give the corresponding allyl alcohols **1**. The characterization data of new compounds are shown as follows:

(±) **1-(2,4,6-triisopropylphenyl)prop-2-en-1-ol (1k)**

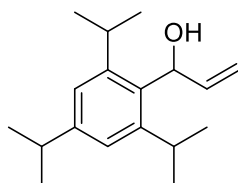

**1k**

Chemical Formula: C<sub>18</sub>H<sub>28</sub>O

Exact Mass: 260.2140

Molecular Weight: 260.4210

The title compound was prepared from 2,4,6-triisopropylphenyl aldehyde (521 mg, 2 mmol) and vinylmagnesium bromide (3 mmol, 1.5 equiv) via general procedure, silica gel column chromatography (EtOAc/PE = 1:10), as a white solid (458 mg, 88% yield).

**<sup>1</sup>H NMR** (300 MHz, CDCl<sub>3</sub>) δ 7.02 (s, 2H), 6.26 (ddd, *J* = 17.3, 10.7, 3.8 Hz, 1H), 5.85 (s, 1H), 5.20-5.02 (m, 2H), 3.49-3.35 (m, 2H), 2.94-2.80 (m, 1H), 1.93 (brs, 1H, -OH), δ 1.25 (d, *J* = 6.9 Hz, 6H), 1.22 (d, *J* = 6.9 Hz, 6H), 1.21 (d, *J* = 6.9 Hz, 6H).

**<sup>13</sup>C NMR** (75 MHz, CDCl<sub>3</sub>) δ 148.4, 147.8, 141.1, 133.7, 122.2, 114.3, 69.9, 34.3, 29.6, 24.9, 24.3, 24.11, 24.07.

**HRMS** (EI) calculated for C<sub>18</sub>H<sub>28</sub>O [M]: 260.2140, found: 260.2136.

(±) **1-(2,3,4,5,6-pentamethylphenyl)prop-2-en-1-ol (II)**

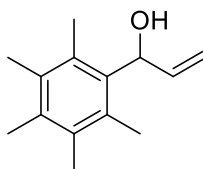

**11**

Chemical Formula: C<sub>14</sub>H<sub>20</sub>O

Exact Mass: 204.1514

Molecular Weight: 204.3130

The **11** was prepared from 2,3,4,5,6-pentamethylphenyl aldehyde (521 mg, 2 mmol, 1eq.) and vinylmagnesium bromide (3 mmol, 1.5 eq.) via general procedure, silica gel column chromatography (EtOAc/PE = 1:10), white solid (368 mg, 85% yield).

**<sup>1</sup>H NMR** (300 MHz, CDCl<sub>3</sub>) δ 6.30-6.18 (m, 1H), 5.86 (s, 1H), 5.29-5.08 (m, 2H), 2.34 (s, 6H), 2.27 (s, 3H), 2.24 (s, 6H), 1.98 (s, 1H, -OH).

**<sup>13</sup>C NMR** (75 MHz, CDCl<sub>3</sub>) δ 139.9, 136.0, 134.8, 133.5, 132.5, 114.4, 72.2, 17.4, 16.8.

**HRMS** (EI) calculated for C<sub>14</sub>H<sub>20</sub>O [M]: 204.1514, found: 204.1508.

**Table S1. Optimization of the reaction conditions<sup>a</sup>**

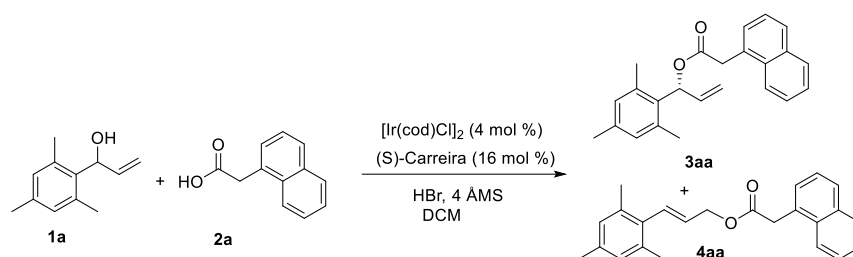

| entry             | solvent                         | Additive                                      | Conversion <sup>b</sup> | 3aa (%) <sup>c</sup> | 4aa (%) <sup>c</sup> | ee (%) <sup>d</sup> |
|-------------------|---------------------------------|-----------------------------------------------|-------------------------|----------------------|----------------------|---------------------|
| 1                 | CH <sub>2</sub> Cl <sub>2</sub> | Zn(OTf) <sub>2</sub>                          | -                       | 0                    | 23                   | -                   |
| 2                 | CH <sub>2</sub> Cl <sub>2</sub> | TFA                                           | 45                      | 31                   | -                    | 53                  |
| 3                 | CH <sub>2</sub> Cl <sub>2</sub> | (PhO) <sub>2</sub> PO <sub>2</sub> H          | trace                   | -                    | -                    | -                   |
| 4                 | CH <sub>2</sub> Cl <sub>2</sub> | PhCO <sub>2</sub> H                           | -                       | -                    | -                    | -                   |
| 5                 | CH <sub>2</sub> Cl <sub>2</sub> | TsOH.H <sub>2</sub> O                         | N.D.                    | 23                   | 34                   | -                   |
| 6                 | CH <sub>2</sub> Cl <sub>2</sub> | HF (48-55 wt.% in H <sub>2</sub> O)           | N.D.                    | 31                   | -                    | 91                  |
| 7                 | CH <sub>2</sub> Cl <sub>2</sub> | HCl (36-38 wt.% in H <sub>2</sub> O)          | N.D.                    | 39                   | -                    | 96                  |
| 8                 | CH <sub>2</sub> Cl <sub>2</sub> | HBr (40 wt.% in H <sub>2</sub> O)             | 64                      | 58                   | 8                    | 95                  |
| 9                 | CH <sub>2</sub> Cl <sub>2</sub> | HI (40 wt.% in H <sub>2</sub> O)              | 68                      | 55                   | N.D.                 | 90                  |
| 10                | CH <sub>2</sub> Cl <sub>2</sub> | HF <sub>4</sub> (48 wt.% in H <sub>2</sub> O) | N.D.                    | 43                   | N.D.                 | 88                  |
| 11                | CH <sub>2</sub> Cl <sub>2</sub> | H <sub>2</sub> SO <sub>4</sub> (concentrated) | -                       | -                    | -                    | -                   |
| 12                | CH <sub>2</sub> Cl <sub>2</sub> | KHF <sub>2</sub>                              | 74                      | 60                   | N.D.                 | 89                  |
| 13                | toluene                         | HBr (40 wt.% in H <sub>2</sub> O)             | N.D.                    | 8                    | -                    | N.D.                |
| 14                | CHCl <sub>3</sub>               | HBr (40 wt.% in H <sub>2</sub> O)             | N.D.                    | 33                   | -                    | 90                  |
| 15                | THF                             | HBr (40 wt.% in H <sub>2</sub> O)             | N.D.                    | trace                | -                    | -                   |
| 16                | DCE                             | HBr (40 wt.% in H <sub>2</sub> O)             | 60                      | 50                   | N.D.                 | 96                  |
| 17 <sup>e</sup>   | CH <sub>2</sub> Cl <sub>2</sub> | HBr (40 wt.% in H <sub>2</sub> O)             | 71                      | 61                   | -                    | 96                  |
| 18 <sup>e,f</sup> | CH <sub>2</sub> Cl <sub>2</sub> | HBr (40 wt.% in H <sub>2</sub> O)             | 78                      | 68                   | -                    | 96                  |
| 19 <sup>e,g</sup> | CH <sub>2</sub> Cl <sub>2</sub> | HBr (40 wt.% in H <sub>2</sub> O)             | 86                      | 76                   | -                    | 97                  |
| 20 <sup>e,h</sup> | CH <sub>2</sub> Cl <sub>2</sub> | HBr (40 wt.% in H <sub>2</sub> O)             | 90                      | 78                   | N.D.                 | 94                  |
| 21 <sup>i</sup>   | CH <sub>2</sub> Cl <sub>2</sub> | HBr (40 wt.% in H <sub>2</sub> O)             | -                       | trace                | -                    | N.D.                |
| 22 <sup>j</sup>   | CH <sub>2</sub> Cl <sub>2</sub> | HBr (40 wt.% in H <sub>2</sub> O)             | -                       | trace                | -                    | N.D.                |

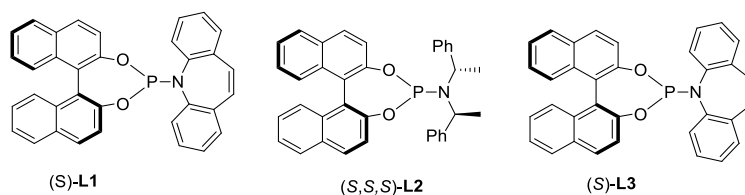

<sup>a</sup> General conditions: **1a** (0.2 mmol), **2a** (0.1 mmol), [Ir(cod)Cl]<sub>2</sub> (4 mol %), **L1** (16 mol%), additive (100 mol%) and 4AMS (40 mg) in solvent (1 mL) at room temperature for 48 h. <sup>b</sup> Determined by the recovered yield of **2a**. <sup>c</sup>Yield of isolated product. <sup>d</sup> Determined by chiral HPLC analysis. <sup>e</sup> 1.2 equivalent of HBr was used. <sup>f</sup> **1a** (0.25 mmol). <sup>g</sup> **1a** (0.3 mmol). <sup>h</sup> **1a** (0.4 mmol). <sup>i</sup> **L2** (16 mol%) instead of **L1**. <sup>j</sup> **L3** (16 mol %) instead of **L1**. N.D. = not determined.

### General procedure for synthesis of **3aa-3na**

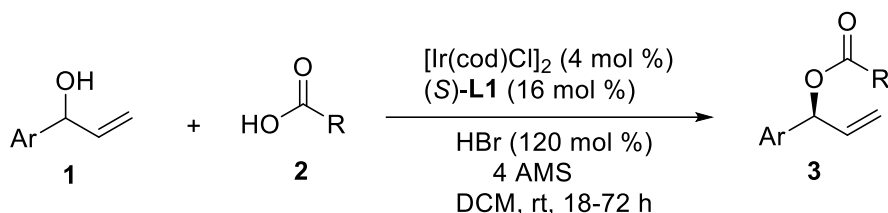

To a tube was charged with [Ir(cod) Cl]<sub>2</sub> (2.6 mg, 4 μmol, 4 mol %) and (*S*)-**L1** (8.0 mg, 16 μmol, 16 mol %). The tube backfilled with argon gas. The tube was added freshly distilled CH<sub>2</sub>Cl<sub>2</sub> (1.0 mL), and stirred at rt. for 10 min. The allylic alcohols **1** (0.3 mmol, 3.0 equiv), carboxylic acids **2** (0.1 mmol, 1.0 equiv.), 4AMS (40 mg) and HBr (40wt.% in water; 24 mg, 0.12 mmol, 120 mol%) were added. The tube was sealed and stirred at rt. for 18 -72 h. Later, the solution was quenched with aq. NaHCO<sub>3</sub> (5 mL) and extracted with CH<sub>2</sub>Cl<sub>2</sub> (3\* 5mL). The organic layer was dried over Na<sub>2</sub>SO<sub>4</sub> and concentrated by rotary evaporation. The crude product was purified by preparative TLC (eluent: EtOAc/PE) to afford the desired products (**3aa-3na**).

### (*1S*)-1-(2,4,6-Trimethylphenyl)-prop-2-en-1-yl-1-naphthaleneacetate (**3aa**)

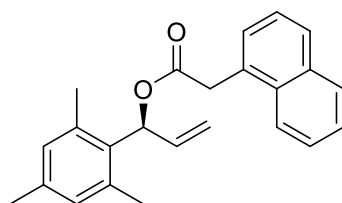

Chemical Formula: C<sub>24</sub>H<sub>24</sub>O<sub>2</sub>  
Exact Mass: 344.1776  
Molecular Weight: 344.4540

The title compound was prepared from **1a** (53.0 mg, 0.3 mmol, 3 eq.) and **2a** (18.6 mg, 0.1 mmol, 1eq.) via general procedure. Purified by preparative TLC (eluent: EtOAc/PE = 1:10) furnished **3aa** (26.2 mg, 76% yield, 97% ee) as colorless oil.

**<sup>1</sup>H NMR** (400 MHz, CDCl<sub>3</sub>) δ 8.00-7.89 (m, 1H), 7.89-7.81 (m, 1H), 7.78 (d, *J* = 7.8 Hz, 1H), 7.53-7.34 (m, 4H), 6.77 (s, 2H), 6.73-6.65 (m, 1H), 5.94 (ddd, *J* = 17.2, 10.6, 4.2 Hz, 1H), 5.06 (d, *J* = 10.6 Hz, 1H), 4.91 (d, *J* = 17.2 Hz, 1H), 4.10 (s, 2H), 2.23 (s, 3H), 2.22 (s, 6H).

**<sup>13</sup>C NMR** (126 MHz, CDCl<sub>3</sub>) δ 169.6, 136.5, 136.1, 134.1, 132.7, 131.1, 130.4, 129.5, 128.6, 127.6, 127.0, 125.3, 124.7, 124.4, 122.7, 114.9, 72.3, 38.3, 19.8, 19.2.

**HRMS** (ESI) *m/z* calculated for C<sub>24</sub>H<sub>24</sub>NaO<sub>2</sub> [M+Na]<sup>+</sup>: 367.1669, found: 367.1662.

**Optical Rotation:** [α]<sub>D</sub><sup>31</sup> = -66.1 (*c* = 0.3, CHCl<sub>3</sub>, 97% ee).

**HPLC:** Daicel Chiralpak OD-H column (hexane/*i*PrOH = 99:1, flow rate: 1.0 mL/min, λ = 254 nm, *t*<sub>R</sub>(major) = 9.88 min, *t*<sub>R</sub> (minor) = 9.14 min. ee = 97%.

**(1*S*)-1-(2,4,6-Trimethylphenyl)-prop-2-en-1-yl-2-naphthaleneacetate (3ab)**

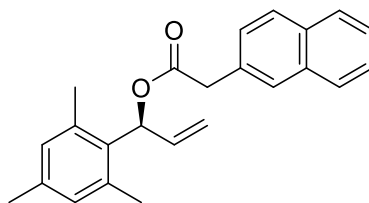

**3ab**

Chemical Formula: C<sub>24</sub>H<sub>24</sub>O<sub>2</sub>

Exact Mass: 344.1776

Molecular Weight: 344.4540

The title compound was prepared from **1a** (53.0 mg, 0.3 mmol, 3 eq.) and **2b** (18.6 mg, 0.1 mmol, 1eq.) via general procedure. Purified by preparative TLC (eluent: EtOAc/PE = 1:10) furnished **3ab** (26.5 mg, 77% yield, 98% ee) as colorless oil.

**<sup>1</sup>H NMR** (400 MHz, CDCl<sub>3</sub>) δ 7.87-7.73 (m, 3H), 7.68 (s, 1H), 7.49-7.40 (m, 2H), 7.38 (dd, *J* = 8.4, 1.6 Hz, 1H), 6.80 (s, 2H), 6.72 (dt, *J* = 4.1, 2.0 Hz, 1H), 6.02 (ddd, *J* = 17.2, 10.6, 4.3 Hz, 1H), 5.12 (ddd, *J* = 10.6, 1.8, 1.3 Hz, 1H), 5.06-4.88 (m, 1H), 3.84 (d, *J* = 15.3 Hz, 1H), 3.79 (d, *J* = 15.3 Hz, 1H), 2.31 (s, 6H), 2.24 (s, 3H).

**<sup>13</sup>C NMR** (100 MHz, CDCl<sub>3</sub>) δ 170.7, 137.7, 137.3, 135.3, 133.6, 132.6, 131.6, 131.5, 129.9, 128.3, 128.2, 127.8, 127.7, 127.6, 126.2, 125.9, 116.2, 73.6, 41.7, 21.0, 20.6.

**HRMS** (ESI) *m/z* calculated for C<sub>24</sub>H<sub>24</sub>NaO<sub>2</sub> [M+Na]<sup>+</sup>: 367.1669, found: 367.1662.

**Optical Rotation:** [α]<sub>D</sub><sup>31</sup> = -16.9 (*c* = 0.1, CHCl<sub>3</sub>, 98% ee).

**HPLC:** The enantiomeric excess was determined by HPLC analysis on a Daicel Chiralpak IC column (hexane/iPrOH = 90:10), flow rate: 1.0 mL/min,  $\lambda = 254$  nm,  $t_R(\text{major}) = 5.57$  min,  $t_R(\text{minor}) = 4.89$  min. e.e. = 98%.

**(1*S*)-1-(2,4,6-Trimethylphenyl)-prop-2-en-1-yl-1-benzeneacetate (3ac)**

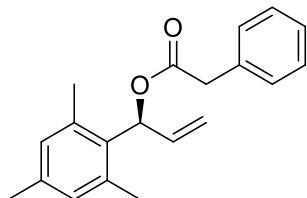

**3ac**

Chemical Formula: C<sub>20</sub>H<sub>22</sub>O<sub>2</sub>

Exact Mass: 294.1620

Molecular Weight: 294.3940

The title compound was prepared from **1a** (53.0 mg, 0.3 mmol, 3 eq.) and **2c** (15.1 mg, 0.1 mmol, 1 eq.) via general procedure. Purified by preparative TLC (eluent: EtOAc/PE = 1:10) furnished **3ac** (19.2 mg, 65% yield, 96% ee) as colorless oil.

**<sup>1</sup>H NMR** (500 MHz, CDCl<sub>3</sub>)  $\delta$  7.37-7.19 (m, 5H), 6.80 (s, 2H), 6.69 (dt,  $J = 4.1, 2.0$  Hz, 1H), 6.01 (ddd,  $J = 17.2, 10.6, 4.3$  Hz, 1H), 5.15-5.12 (m, 1H), 5.06-4.92 (m, 1H), 3.68 (d,  $J = 15.3$  Hz, 1H), 3.63 (d,  $J = 15.3$  Hz, 1H), 2.31 (s, 6H), 2.24 (s, 3H). **<sup>13</sup>C NMR** (126 MHz, CDCl<sub>3</sub>)  $\delta$  170.8, 137.7, 137.3, 135.3, 134.0, 131.6, 129.9, 129.5, 128.7, 127.2, 116.1, 73.4, 41.6, 21.0, 20.5.

**HRMS** (ESI)  $m/z$  calculated for C<sub>20</sub>H<sub>22</sub>NaO<sub>2</sub> [M+Na]<sup>+</sup>: 317.1512, found: 317.1509.

**Optical Rotation:**  $[\alpha]_D^{31} = -28.1$  ( $c = 0.2$ , CHCl<sub>3</sub>).

**HPLC:** The enantiomeric excess was determined by HPLC analysis on a Daicel Chiralpak AD-H column (hexane/iPrOH = 99:1), flow rate: 1.0 mL/min,  $\lambda = 234$  nm,  $t_R(\text{major}) = 6.91$  min,  $t_R(\text{minor}) = 4.87$  min. ee = 94%.

**(1*S*)-1-(2,4,6-Trimethylphenyl)-prop-2-en-1-yl-1-(4-nitro)-benzeneacetate (3ad)**

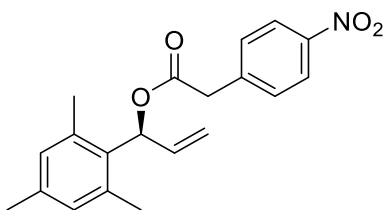

**3ad**

Chemical Formula: C<sub>20</sub>H<sub>21</sub>NO<sub>4</sub>

Exact Mass: 339.1471

Molecular Weight: 339.3910



The title compound was prepared from **1a** (53.0 mg, 0.3 mmol, 3 eq.) and **2d** (18.1 mg, 0.1 mmol, 1eq.) via general procedure. Purified by preparative TLC (eluent: EtOAc/PE = 1:5) furnished **3ad** (27.1 mg, 80% yield, 94% ee) as yellow oil.

**<sup>1</sup>H NMR** (300 MHz, CDCl<sub>3</sub>) δ 8.17 (d, *J* = 8.8 Hz, 2H), 7.42 (d, *J* = 8.8 Hz, 2H), 6.82 (s, 2H), 6.71 (dt, *J* = 4.2, 2.0 Hz, 1H), 6.03 (ddd, *J* = 17.1, 10.6, 4.4 Hz, 1H), 5.19-5.11 (m, 1H), 5.07-5.00 (m, 1H), 3.80 (d, *J* = 15.6 Hz, 1H), 3.74 (d, *J* = 15.6 Hz, 1H), 2.31 (s, 6H), 2.25 (s, 3H).

**<sup>13</sup>C NMR** (75 MHz, CDCl<sub>3</sub>) δ 169.4, 147.3, 141.4, 138.0, 137.2, 135.0, 131.2, 130.5, 130.0, 123.9, 116.7, 74.1, 41.2, 21.0, 20.5.

**HRMS** (ESI) calculated for C<sub>20</sub>H<sub>21</sub>NNaO<sub>4</sub> [M+Na]<sup>+</sup>: 362.1363, found: 362.11366.

**Optical Rotation:** [α]<sub>D</sub><sup>31</sup> = -23.0 (*c* = 0.2, CHCl<sub>3</sub>).

**HPLC:** The enantiomeric excess was determined by HPLC analysis on a Daicel Chiralpak IE column (hexane/*i*PrOH = 90:10), flow rate: 1.0 mL/min, λ = 225 nm, t<sub>R</sub>(major) = 10.05 min, t<sub>R</sub>(minor) = 9.40 min. ee = 94%.

**(*1S*)-1-(2,4,6-Trimethylphenyl)-prop-2-en-1-yl-1-(4-methoxy)-benzeneacetate (**3ae**)**

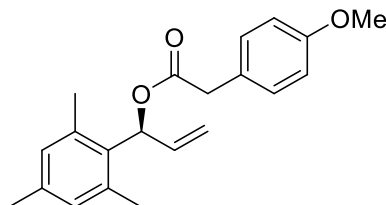

**3ae**

Chemical Formula: C<sub>21</sub>H<sub>24</sub>O<sub>3</sub>

Exact Mass: 324.1725

Molecular Weight: 324.4200

The title compound was prepared from **1a** (53.0 mg, 0.3 mmol, 3 eq.) and **2e** (18.1 mg, 0.1 mmol, 1eq.) via general procedure. Purified by preparative TLC (eluent: EtOAc/PE = 1:5) furnished **3ae** (22.0 mg, 68% yield, 98% ee) as yellow oil.

**<sup>1</sup>H NMR** (400 MHz, CDCl<sub>3</sub>) δ 7.19-7.05 (m, 2H), 6.88-6.78 (m, 4H), 6.68 (dt, *J* = 4.2, 2.0 Hz, 1H), 6.01 (ddd, *J* = 17.3, 10.6, 4.3 Hz, 1H), 5.13 (ddd, *J* = 10.6, 1.9, 1.3 Hz, 1H), 5.07-4.93 (m, 1H), 3.78 (s, 3H), 3.62 (d, *J* = 15.5 Hz, 1H), 3.56 (d, *J* = 15.5 Hz, 1H), 2.32 (s, 6H), 2.24 (s, 3H).

**<sup>13</sup>C NMR** (100 MHz, CDCl<sub>3</sub>) δ 171.1, 158.8, 137.7, 137.2, 135.3, 131.6, 130.5, 129.9, 126.1, 116.1, 114.1, 73.4, 55.4, 40.6, 21.0, 20.5.

**HRMS** (ESI) calculated for C<sub>21</sub>H<sub>24</sub>NaO<sub>3</sub> [M+Na]<sup>+</sup>: 347.1618, found: 347.1619.

**Optical Rotation:** [α]<sub>D</sub><sup>31</sup> = -33.1 (*c* = 0.1, CHCl<sub>3</sub>, 98% ee).

**HPLC:** The enantiomeric excess was determined by HPLC analysis on a Daicel Chiralpak IC column (hexane/iPrOH = 90:10), flow rate: 1.0 mL/min,  $\lambda = 225$  nm,  $t_R(\text{major}) = 5.75$  min,  $t_R(\text{minor}) = 5.06$  min. ee = 98%.

**(1*S*)-1-(2,4,6-Trimethylphenyl)-prop-2-en-1-yl-2-thiopheneacetate (3af)**

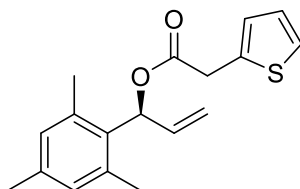

**3af**

Chemical Formula:  $C_{18}H_{20}O_2S$

Exact Mass: 300.1184

Molecular Weight: 300.4160

The title compound was prepared from **1a** (53.0 mg, 0.3 mmol, 3 eq.) and **2f** (14.1 mg, 0.1 mmol, 1 eq.) via general procedure. Purified by preparative TLC (eluent: EtOAc/PE = 1:10) furnished **3af** (22.2 mg, 74% yield, 97% ee) as yellow oil.

**<sup>1</sup>H NMR** (400 MHz,  $CDCl_3$ )  $\delta$  7.19 (dd,  $J = 5.1, 1.2$  Hz, 1H), 6.97-6.91 (m, 2H), 6.82 (s, 2H), 6.72 (dt,  $J = 4.2, 2.0$  Hz, 1H), 6.04 (ddd,  $J = 17.2, 10.6, 4.3$  Hz, 1H), 5.23-5.13 (m, 1H), 5.10-4.98 (m, 1H), 3.90 (d,  $J = 16.6$  Hz, 1H), 3.83 (d,  $J = 16.6$  Hz, 1H), 2.34 (s, 6H), 2.24 (s, 3H).

**<sup>13</sup>C NMR** (75 MHz,  $CDCl_3$ )  $\delta$  169.6, 137.8, 137.3, 135.2, 135.0, 131.4, 129.9, 127.1, 126.9, 125.2, 116.4, 73.8, 35.6, 21.0, 20.6.

**HRMS** (ESI)  $m/z$  calculated for  $C_{18}H_{20}NaO_2S$   $[M+Na]^+$ : 323.1076, found: 323.1078.

**Optical Rotation:**  $[\alpha]_D^{31} = -55.0$  ( $c = 0.1$ ,  $CHCl_3$ , 97% ee).

**HPLC:** The enantiomeric excess was determined by HPLC analysis on a Daicel Chiralpak AD-H column (hexane/iPrOH = 99:1), flow rate: 1.0 mL/min,  $\lambda = 224$  nm,  $t_R(\text{major}) = 6.54$  min,  $t_R(\text{minor}) = 5.01$  min. ee = 97%.

**(1*S*)-1-(2,4,6-Trimethylphenyl)-prop-2-en-1-yl-benzoate (3ag)**

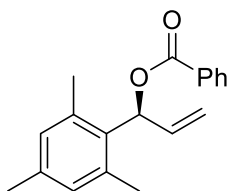

**3ag**

Chemical Formula:  $C_{19}H_{20}O_2$

Exact Mass: 280.1463

Molecular Weight: 280.3670

The title compound was prepared from **1a** (53.0 mg, 0.3 mmol, 3 eq.) and **2g** (12.0 mg, 0.1 mmol, 1eq.) via general procedure. Purified by preparative TLC (eluent: EtOAc/PE = 1:10) furnished **3ag** (21.2 mg, 76% yield, 99% ee) as colorless oil. The <sup>1</sup>H NMR and <sup>13</sup>C NMR were consistent with the reported literature.<sup>[1]</sup>

**<sup>1</sup>H NMR** (400 MHz, CDCl<sub>3</sub>) δ 8.12-7.86 (m, 2H), 7.59-7.48 (m, 1H), 7.42 (dd, *J* = 10.6, 4.7 Hz, 2H), 6.94 (dt, *J* = 4.2, 2.1 Hz, 1H), 6.84 (s, 2H), 6.19 (ddd, *J* = 17.2, 10.6, 4.2 Hz, 1H), 5.25-5.17 (m, 2H), 2.48 (s, 6H), 2.24 (s, 3H).

**<sup>13</sup>C NMR** (100 MHz, CDCl<sub>3</sub>) δ 165.7, 137.7, 137.2, 135.6, 133.1, 131.8, 130.4, 129.9, 129.8, 128.5, 116.3, 73.6, 21.0, 20.8.

**Optical Rotation:** [ $\alpha$ ]<sub>D</sub><sup>31</sup> = -8.0 (*c* = 0.2, CHCl<sub>3</sub>, 99% ee).

**HPLC:** The enantiomeric excess was determined by HPLC analysis on a Daicel Chiralpak ID column (hexane/iPrOH = 90:10), flow rate: 1.0 mL/min,  $\lambda$  = 225 nm, *t*<sub>R</sub>(major) = 3.99 min, *t*<sub>R</sub>(minor) = 5.10 min. ee = 99%.

**(*1S*)-1-(2,4,6-Trimethylphenyl)-prop-2-en-1-yl-(4-nitro)-benzoate (3ah)**

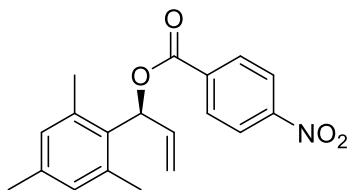

**3ah**

Chemical Formula: C<sub>19</sub>H<sub>19</sub>NO<sub>4</sub>

Exact Mass: 325.1314

Molecular Weight: 325.3640

The title compound was prepared from **1a** (53.0 mg, 0.3 mmol, 3 eq.) and **2h** (16.6 mg, 0.1 mmol, 1eq.) via general procedure. Purified by preparative TLC (eluent: EtOAc/PE = 1:4) furnished **3ah** (21.1 mg, 65% yield, 93% ee) as colorless oil.

**<sup>1</sup>H NMR** (400 MHz, CDCl<sub>3</sub>) δ 8.30-8.22 (m, 4H), 7.04-6.92 (m, 1H), 6.87 (s, 2H), 6.21 (ddd, *J* = 17.2, 10.6, 4.3 Hz, 1H), 5.29 (d, *J* = 10.6 Hz, 1H), 5.20 (d, *J* = 17.2 Hz, 1H), 2.48 (s, 6H), 2.26 (s, 3H).

**<sup>13</sup>C NMR** (75 MHz, CDCl<sub>3</sub>) δ 163.9, 150.6, 138.2, 137.2, 135.8, 135.0, 131.1, 130.9, 130.1, 123.7, 117.1, 74.8, 21.0, 20.7.

**HRMS** (ESI) calculated for C<sub>19</sub>H<sub>19</sub>NNaO<sub>4</sub> [M+Na]<sup>+</sup>: 348.1206, found: 348.1200.

**Optical Rotation:** [ $\alpha$ ]<sub>D</sub><sup>31</sup> = -2.1 (*c* = 0.1, CHCl<sub>3</sub>, 93% ee).

**HPLC:** The enantiomeric excess was determined by HPLC analysis on a Daicel Chiralpak OJ column (hexane/iPrOH = 97:3), flow rate: 1.0 mL/min,  $\lambda = 234$  nm,  $t_R(\text{major}) = 6.13$  min,  $t_R(\text{minor}) = 5.60$  min. 93% ee.

**(1*S*)-1-(2,4,6-Trimethylphenyl)-prop-2-en-1-yl-(2*E*)-2-butenolate (3ai)**

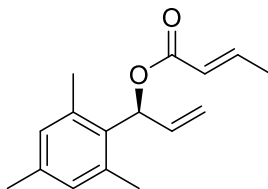

**3ai**

Chemical Formula: C<sub>16</sub>H<sub>20</sub>O<sub>2</sub>

Exact Mass: 244.1463

Molecular Weight: 244.3340

The title compound was prepared from **1a** (53.0 mg, 0.3 mmol, 3 eq.) and **2i** (8.6 mg, 0.1 mmol, 1eq.) via general procedure. Purified by preparative TLC (eluent: EtOAc/PE = 1:10) furnished **3ai** (19.3 mg, 79% yield, 99% ee) as colorless oil.

**<sup>1</sup>H NMR** (400 MHz, CDCl<sub>3</sub>)  $\delta$  7.10-6.91 (m, 1H), 6.82 (s, 2H), 6.74 (dt,  $J = 4.1, 2.0$  Hz, 1H), 6.09 (ddd,  $J = 17.2, 10.6, 4.3$  Hz, 1H), 5.88 (dd,  $J = 15.5, 1.7$  Hz, 1H), 5.24-5.12 (m, 1H), 5.13-5.02 (m, 1H), 2.40 (s, 6H), 2.24 (s, 3H), 1.87 (dd,  $J = 6.9, 1.6$  Hz, 3H).

**<sup>13</sup>C NMR** (100 MHz, CDCl<sub>3</sub>)  $\delta$  165.7, 145.0, 137.6, 137.2, 135.6, 131.9, 129.9, 122.8, 116.0, 72.74, 21.0, 20.7, 18.2.

**HRMS** (ESI) calculated for C<sub>16</sub>H<sub>20</sub>NaO<sub>2</sub> [M+Na]<sup>+</sup>: 267.1356, found: 267.1360.

**Optical Rotation:**  $[\alpha]_D^{31} = -21.0$  ( $c = 0.2$ , CHCl<sub>3</sub>, 99% ee).

**HPLC:** The enantiomeric excess was determined by HPLC analysis on a Daicel Chiralpak OJ-H column (hexane/iPrOH = 99:1), flow rate: 0.6 mL/min,  $\lambda = 225$  nm,  $t_R(\text{major}) = 10.13$  min,  $t_R(\text{minor}) = 8.83$  min. ee = 99%.

**(1*S*)-1-(2,4,6-Trimethylphenyl)-prop-2-en-1-yl-(2*E*)-3-phenyl-2-acrylate (3aj)**

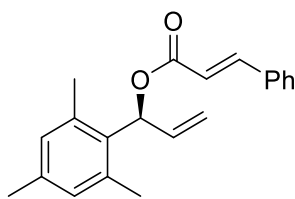

**3aj**

Chemical Formula: C<sub>21</sub>H<sub>22</sub>O<sub>2</sub>

Exact Mass: 306.1620

Molecular Weight: 306.4050

The title compound was prepared from **1a** (53.0 mg, 0.3 mmol, 3 eq.) and **2j** (14.8 mg, 0.1 mmol, 1 eq.) via general procedure. Purified by preparative TLC (eluent: EtOAc/PE = 1:10) furnished **3aj** (21.8 mg, 71% yield, 98% ee) as colorless oil.

<sup>1</sup>H NMR (300 MHz, CDCl<sub>3</sub>) δ 7.69 (d, *J* = 16.0 Hz, 1H), 7.52-7.41 (m, 2H), 7.38-7.36 (m, 3H), 6.89-6.70 (m, 3H), 6.47 (dd, *J* = 16.0, 0.5 Hz, 1H), 6.20-6.09 (m, 1H), 5.29-5.01 (m, 2H), 2.44 (s, 6H), 2.25 (s, 3H).

<sup>13</sup>C NMR (75 MHz, CDCl<sub>3</sub>) δ 166.2, 145.2, 137.7, 137.2, 135.6, 134.5, 131.9, 130.4, 129.9, 129.0, 128.2, 118.2, 116.3, 73.2, 21.0, 20.7.

HRMS (ESI) *m/z* calculated for C<sub>21</sub>H<sub>22</sub>NaO<sub>2</sub> [M+Na]<sup>+</sup>: 329.1512, found: 329.1507.

**Optical Rotation:** [ $\alpha$ ]<sub>D</sub><sup>31</sup> = -15.0 (*c* = 0.1, CHCl<sub>3</sub>, 98% ee).

**HPLC:** The enantiomeric excess was determined by HPLC analysis on a Daicel Chiralpak IE column (hexane/*i*PrOH = 90:10, flow rate: 1.0 mL/min,  $\lambda$  = 234 nm, *t*<sub>R</sub>(major) = 5.33 min, *t*<sub>R</sub>(minor) = 5.79 min. ee = 98%.

**(1S)-1-(2,4,6-Trimethylphenyl)-prop-2-en-1-yl-acetate(3ak)**

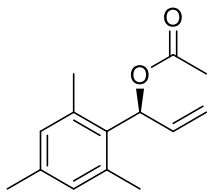

**3ak**

Chemical Formula: C<sub>14</sub>H<sub>18</sub>O<sub>2</sub>

Exact Mass: 218.1307

Molecular Weight: 218.2960

The title compound was prepared from **1a** (106.0 mg, 0.6 mmol, 3 eq.) and **2k** (12.0 mg, 0.2 mmol, 1 eq.) via general procedure. Purified by preparative TLC (eluent: EtOAc/PE = 1:15) furnished **3ak** (33.1 mg, 76% yield, 99% ee) as colorless oil. The NMR data is consistent with the reported literature.<sup>[1]</sup>

**<sup>1</sup>H NMR** (300 MHz, CDCl<sub>3</sub>) δ 6.83 (s, 2H), 6.69 (dt, *J* = 4.2, 2.0 Hz, 1H), 6.06 (ddd, *J* = 17.2, 10.6, 4.4 Hz, 1H), 5.17 (ddd, *J* = 10.6, 2.0, 1.2 Hz, 1H), 5.08 (ddd, *J* = 17.2, 1.9, 1.2 Hz, 1H), 2.38 (s, 6H), 2.25 (s, 3H), 2.08 (s, 3H).

**<sup>13</sup>C NMR** (75 MHz, CDCl<sub>3</sub>) δ 170.2, 137.7, 137.2, 135.5, 131.8, 129.9, 116.2, 73.0, 21.2, 21.0, 20.6.

**Optical Rotation:** [ $\alpha$ ]<sub>D</sub><sup>31</sup> = -16.0 (*c* = 0.4, CHCl<sub>3</sub>, 99% ee).

**HPLC:** The enantiomeric excess was determined by HPLC analysis on a Daicel Chiralpak ID column (hexane/*i*PrOH = 99:1), flow rate: 0.8 mL/min,  $\lambda$  = 224 nm, *t*<sub>R</sub>(major) = 5.94 min, *t*<sub>R</sub> (minor) = 7.73 min. ee = 99%.

**(*S*)-1-(2,4,6-Trimethylphenyl)-prop-2-en-1-yl-4-butenolate (3aI)**

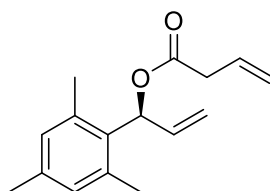

**3aI**

Chemical Formula: C<sub>16</sub>H<sub>20</sub>O<sub>2</sub>

Exact Mass: 244.1463

Molecular Weight: 244.3340

The title compound was prepared from **1a** (53.0 mg, 0.3 mmol, 3 eq.) and **2I** (8.6 mg, 0.1 mmol, 1eq.) via general procedure. Purified by preparative TLC (eluent: EtOAc/PE = 1:15) furnished **3aI** (17.6 mg, 72% yield, 96% ee) as colorless oil.

**<sup>1</sup>H NMR** (400 MHz, CDCl<sub>3</sub>) δ 6.83 (s, 2H), 6.71 (dt, *J* = 4.2, 2.0 Hz, 1H), 6.06 (ddd, *J* = 17.3, 10.6, 4.4 Hz, 1H), 5.98-5.84 (m, 1H), 5.21-4.94 (m, 4H), 3.24-3.00 (m, 2H), 2.38 (s, 6H), 2.25 (s, 3H).

**<sup>13</sup>C NMR** (100 MHz, CDCl<sub>3</sub>) δ 170.7, 137.8, 137.2, 135.4, 131.7, 130.3, 129.9, 118.8, 116.2, 73.26, 39.4, 21.0, 20.6.

**HRMS** (ESI) calculated for C<sub>16</sub>H<sub>24</sub>NO<sub>2</sub> [M+NH<sub>4</sub>]<sup>+</sup>: 262.1802, found: 262.1795.

**Optical Rotation:** [ $\alpha$ ]<sub>D</sub><sup>31</sup> = -27.1 (*c* = 0.1, CHCl<sub>3</sub>, 96% ee).

**HPLC:** The enantiomeric excess was determined by HPLC analysis on a Daicel Chiralpak ID column (hexane/*i*PrOH = 99:1), flow rate: 1.0 mL/min,  $\lambda$  = 224 nm, *t*<sub>R</sub>(major) = 4.24 min, *t*<sub>R</sub> (minor) = 4.99 min. ee = 96%.

**(*S*)-1-(2,4,6-Trimethylphenyl)-prop-2-en-1-yl-2-cyclopropanecarboxylate (3aM)**

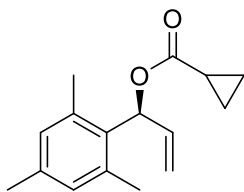

**3am**

Chemical Formula: C<sub>16</sub>H<sub>20</sub>O<sub>2</sub>

Exact Mass: 244.1463

Molecular Weight: 244.3340

The title compound was prepared from **1a** (53.0 mg, 0.3 mmol, 3 eq.) and **2m** (8.6 mg, 0.1 mmol, 1eq.) via general procedure. Purified by preparative TLC (eluent: EtOAc/PE = 1:10) furnished **3am** (19.7 mg, 81% yield, >99% ee) as colorless oil.

**<sup>1</sup>H NMR** (400 MHz, CDCl<sub>3</sub>) δ 6.83 (s, 2H), 6.69 (dt, *J* = 4.1, 2.0 Hz, 1H), 6.07 (ddd, *J* = 17.2, 10.6, 4.3 Hz, 1H), 5.24-5.14 (m, 1H), 5.14-4.95 (m, 1H), 2.39 (s, 6H), 2.25 (s, 3H), 1.65 (ddd, *J* = 16.0, 10.3, 6.2 Hz, 1H), 1.09-0.92 (m, 2H), 0.89-0.78 (m, 2H).

**<sup>13</sup>C NMR** (100 MHz, CDCl<sub>3</sub>) δ 174.1, 137.6, 137.2, 135.6, 131.9, 129.9, 116.0, 73.0, 21.0, 20.6, 13.1, 8.6, 8.6.

**HRMS** (ESI) calculated for C<sub>16</sub>H<sub>20</sub>NaO<sub>2</sub> [M+Na]<sup>+</sup>: 267.1356, found: 267.1360.

**Optical Rotation:** [ $\alpha$ ]<sub>D</sub><sup>31</sup> = -18.0 (*c* = 0.15, CHCl<sub>3</sub>, >99% ee).

**HPLC:** The enantiomeric excess was determined by HPLC analysis on a Daicel Chiralpak ID column (hexane/*i*PrOH = 99:1), flow rate: 1.0 mL/min,  $\lambda$  = 224 nm, *t*<sub>R</sub>(major) = 4.09 min, *t*<sub>R</sub> (minor) = 5.50 min. ee > 99%.

**(1S)-1-(2,4,6-Trimethylphenyl)-prop-2-en-1-yl-2-phenoxyacetate (3an)**

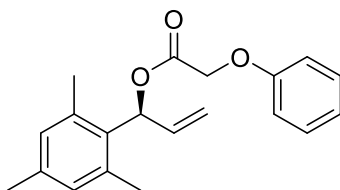

**3an**

Chemical Formula: C<sub>20</sub>H<sub>22</sub>O<sub>3</sub>

Exact Mass: 310.1569

Molecular Weight: 310.3930

The title compound was prepared from **1a** (53.0 mg, 0.3 mmol, 3 eq.) and **2n** (15.2 mg, 0.1 mmol, 1eq.) via general procedure. Purified by preparative TLC (eluent: EtOAc/PE = 1:8) furnished **3an** (23.7 mg, 76% yield, 95% ee) as colorless oil.

**<sup>1</sup>H NMR** (300 MHz, CDCl<sub>3</sub>) δ 7.35-7.17 (m, 1H), 7.04-6.74 (m, 3H), 6.15-5.88 (m, 1H), 5.28-5.03

(m, 1H), 4.73-4.47 (m, 1H), 2.35 (s, 3H), 2.25 (s, 1H).

$^{13}\text{C}$  NMR (75 MHz,  $\text{CDCl}_3$ )  $\delta$  168.3, 157.9, 138.0, 137.3, 134.9, 131.2, 129.9, 129.7, 121.8, 116.8, 114.7, 74.1, 65.4, 21.0, 20.6.

**HRMS** (ESI) calculated for  $\text{C}_{20}\text{H}_{22}\text{NaO}_3$   $[\text{M}+\text{Na}]^+$ : 333.1461, found: 333.1458.

**Optical Rotation:**  $[\alpha]_{\text{D}}^{31} = -39.4$  ( $c = 0.2$ ,  $\text{CHCl}_3$ , 95% ee).

**HPLC:** Daicel Chiralpak IC column (hexane/*i*PrOH = 90:10, flow rate: 1.0 mL/min,  $\lambda = 225$  nm,  $t_{\text{R}}$ (major) = 5.37 min,  $t_{\text{R}}$  (minor) = 4.99 min. ee = 95%.

**(*S*)-1-(2,4,6-Trimethylphenyl)-prop-2-en-1-yl-2-L-(*tert*-butoxycarbonylamino)-2-benzeneacetate (**3ao**)**

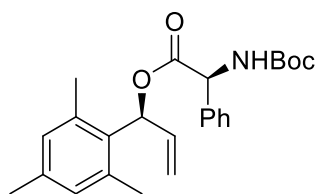

**3ao**

Chemical Formula:  $\text{C}_{25}\text{H}_{31}\text{NO}_4$

Exact Mass: 409.2253

Molecular Weight: 409.5260

The title compound was prepared from **1a** (53.0 mg, 0.3 mmol, 3 eq.) and **2o** (25.1 mg, 0.1 mmol, 1eq.) via general procedure. Purified by preparative TLC (eluent: EtOAc/PE = 1:4) furnished **3ao** (26.1 mg, 64% yield) as colorless oil. Dr = 10:1, determined by crude  $^1\text{H}$  NMR. The major isomer:  $^1\text{H}$  NMR (400 MHz,  $\text{CDCl}_3$ )  $\delta$  7.29-7.09 (m, 5H), 6.69 (s, 2H), 6.66-6.57 (m, 1H), 6.04 (ddd,  $J = 17.2, 10.6, 4.3$  Hz, 1H), 5.49 (d,  $J = 7.5$  Hz, 1H, -NHBoc), 5.38 (d,  $J = 7.5$  Hz, 1H), 5.21-5.12 (m, 1H), 5.10-4.96 (m, 1H), 2.20 (s, 3H), 2.06 (s, 6H), 1.41 (s, 9H).

$^{13}\text{C}$  NMR (75 MHz,  $\text{CDCl}_3$ )  $\delta$  170.2, 154.9, 137.5, 137.1, 134.8, 130.7, 129.6, 128.8, 128.3, 127.4, 127.1, 116.5, 80.1, 74.82, 57.7, 28.3, 20.9, 20.0.

**HRMS** (ESI) calculated for  $\text{C}_{25}\text{H}_{31}\text{NNaO}_4$   $[\text{M}+\text{Na}]^+$ : 432.2145, found: 432.2145.

**Optical Rotation:**  $[\alpha]_{\text{D}}^{31} = -72.1$  ( $c = 0.2$ ,  $\text{CHCl}_3$ ).

**(*S*)-1-(2,4,6-Trimethylphenyl)-prop-2-en-1-yl-2-L-(*tert*-butoxycarbonylamino)-2-cyclohexyl acetate (**3ap**)**



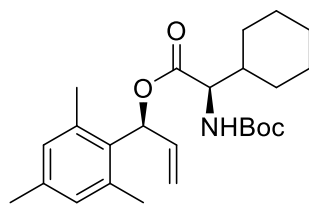

**3ap**

Chemical Formula: C<sub>25</sub>H<sub>37</sub>NO<sub>4</sub>

Exact Mass: 415.2723

Molecular Weight: 415.5740

The title compound was prepared from **1a** (53.0 mg, 0.3 mmol, 3 eq.) and **2p** (25.7 mg, 0.1 mmol, 1 eq.) via general procedure. Purified by preparative TLC (eluent: EtOAc/PE = 1:4) furnished **3ap** (22.0 mg, 53% yield) as yellow oil. Dr > 19:1, determined by crude <sup>1</sup>H NMR.

<sup>1</sup>H NMR (400 MHz, CDCl<sub>3</sub>) δ 6.81 (s, 2H), 6.72-6.61 (m, 1H), 6.09 (ddd, *J* = 17.2, 10.7, 4.2 Hz, 1H), 5.20 (d, *J* = 10.7 Hz, 1H), 5.13-5.05 (m, 1H), 4.98 (d, *J* = 9.3 Hz, 1H), 4.32 (dd, *J* = 9.4, 4.7 Hz, 1H), 2.39 (s, 6H), 2.24 (s, 3H), 1.85-1.58 (m, 4H), 1.43 (s, 9H), 1.26-0.99 (m, 6H), 0.92-0.84 (m, 1H).

<sup>13</sup>C NMR (100 MHz, CDCl<sub>3</sub>) δ 171.8, 155.8, 137.8, 137.2, 135.3, 131.4, 129.8, 116.5, 79.8, 74.12, 58.32, 41.0, 29.6, 28.4, 27.4, 26.2, 25.97, 25.96, 21.0, 20.6.

HRMS (ESI) calculated for C<sub>25</sub>H<sub>37</sub>NNaO<sub>4</sub> [M+Na]<sup>+</sup>: 438.2615, found: 438.2613.

Optical Rotation: [α]<sub>D</sub><sup>31</sup> = -176.2 (*c* = 0.3, CHCl<sub>3</sub>).

**(1S)-1-(2,4,6-Trimethylphenyl)-prop-2-en-1-yl-2-L-(tert-butoxycarbonylamino)-4-methylvalerate(3aq)**

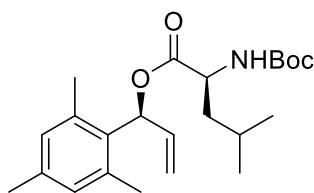

**3aq**

Chemical Formula: C<sub>23</sub>H<sub>35</sub>NO<sub>4</sub>

Exact Mass: 389.2566

Molecular Weight: 389.5360

The title compound was prepared from **1a** (53.0 mg, 0.3 mmol, 3 eq.) and **2q** (23.0 mg, 0.1 mmol, 1 eq.) via general procedure. Purified by preparative TLC (eluent: EtOAc/PE = 1:5) furnished **3aq** (19.4 mg, 50% yield) as yellow oil. Dr > 19:1, determined by crude <sup>1</sup>H NMR.

**<sup>1</sup>H NMR** (400 MHz, CDCl<sub>3</sub>) δ 6.82 (s, 1H), 6.72 (s, 1H), 6.07 (ddd, *J* = 17.3, 10.6, 4.2 Hz, 1H), 5.19 (d, *J* = 10.6 Hz, 1H), 5.09 (d, *J* = 17.3 Hz, 1H), 4.87 (d, *J* = 8.9 Hz, 1H), 4.39 (td, *J* = 9.3, 4.5 Hz, 1H), 2.38 (s, 3H), 2.25 (s, 2H), 1.70 – 1.48 (m, 1H), 1.43 (s, 4H), 0.91 (d, *J* = 6.4 Hz, 2H), 0.86 (d, *J* = 6.5 Hz, 2H). **<sup>13</sup>C NMR** (75 MHz, CDCl<sub>3</sub>) δ 172.8, 155.5, 137.8, 137.2, 135.3, 131.3, 129.9, 116.5, 79.9, 73.9, 52.3, 41.8, 28.4, 24.8, 23.1, 21.9, 21.0, 20.6.

**HRMS** (ESI) calculated for C<sub>23</sub>H<sub>35</sub>NNaO<sub>4</sub> [M+Na]<sup>+</sup>: 412.2458, found: 412.2454.

**Optical Rotation:** [α]<sub>D</sub><sup>31</sup> = -107.1 (*c* = 0.2, CHCl<sub>3</sub>).

**(1*S*)-1-(2,4,6-Trimethylphenyl)-prop-2-en-1-yl-adapalene ester(3ar)**

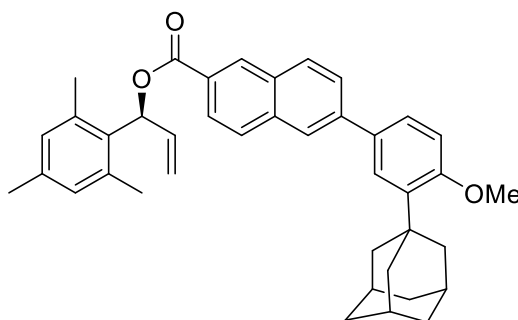

**3ar**

Chemical Formula: C<sub>40</sub>H<sub>42</sub>O<sub>3</sub>

Exact Mass: 570.3134

Molecular Weight: 570.7730

The title compound was prepared from **1a** (53.0 mg, 0.3 mmol, 3 eq.) and **2r** (41.1 mg, 0.1 mmol, 1eq.) via general procedure. Purified by preparative TLC (eluent: EtOAc/PE = 1:5) furnished **3ar** (30.8 mg, 54% yield, 99% ee) as yellow oil.

**<sup>1</sup>H NMR** (400 MHz, CDCl<sub>3</sub>) δ 8.63 (s, 1H), 8.09 (dd, *J* = 8.6, 1.5 Hz, 1H), 8.02-7.95 (m, 2H), 7.90 (d, *J* = 8.7 Hz, 1H), 7.79 (dd, *J* = 8.5, 1.6 Hz, 1H), 7.59 (d, *J* = 2.2 Hz, 1H), 7.54 (dd, *J* = 8.4, 2.2 Hz, 1H), 6.99 (d, *J* = 8.5 Hz, 2H), 6.87 (s, 2H), 6.26 (ddd, *J* = 17.2, 10.6, 4.2 Hz, 1H), 5.33-5.06 (m, 2H), 3.90 (s, 3H), 2.53 (s, 6H), 2.26 (s, 3H), 2.18 (s, 6H), 2.10 (s, 3H), 1.80 (s, 6H).

**<sup>13</sup>C NMR** (100 MHz, CDCl<sub>3</sub>) δ 166.0, 159.0, 141.5, 139.1, 137.8, 137.3, 136.1, 135.7, 132.7, 131.9, 131.4, 131.1, 130.0, 129.9, 128.4, 127.2, 126.6, 126.1, 125.9, 125.8, 124.9, 116.4, 112.2, 73.7, 55.3, 40.7, 37.34, 37.26, 29.8, 29.2, 21.0, 20.8.

**HRMS** (ESI) *m/z* calculated for C<sub>40</sub>H<sub>42</sub>NaO<sub>3</sub> [M+Na]<sup>+</sup>: 593.3026, found: 593.3008.

**Optical Rotation:** [α]<sub>D</sub><sup>31</sup> = -101.8 (*c* = 0.1, CHCl<sub>3</sub>, 99% ee).

**HPLC:** The enantiomeric excess was determined by HPLC analysis on a Daicel Chiralpak ID column (hexane/iPrOH = 90:10, flow rate: 1.0 mL/min,  $\lambda = 254$  nm,  $t_R(\text{major}) = 5.67$  min,  $t_R(\text{minor}) = 7.21$  min. ee = 99%.

**(1*S*)-1-(2,4,6-Trimethylphenyl)-prop-2-en-1-yl-4-(*N,N*-dipropylsulfonamido) Benzoate (3as)**

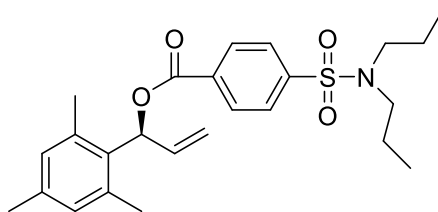

**3as**

Chemical Formula:  $C_{25}H_{33}NO_4S$

Exact Mass: 443.2130

Molecular Weight: 443.6020

The title compound was prepared from **1a** (53.0 mg, 0.3 mmol, 3 eq.) and **2s** (28.5 mg, 0.1 mmol, 1eq.) via general procedure. Purified by preparative TLC (eluent: EtOAc/PE = 1:5) furnished **3as** (32.8 mg, 74% yield, 86% ee) as yellow oil.

**<sup>1</sup>H NMR** (300 MHz,  $CDCl_3$ )  $\delta$  8.18 (d,  $J = 7.5$  Hz, 2H), 7.87 (d,  $J = 7.6$  Hz, 2H), 6.96 (dd,  $J = 3.7, 1.5$  Hz, 1H), 6.86 (s, 2H), 6.21-6.17 (m, 1H), 5.30-5.25 (m, 1H), 5.24-5.15 (m, 1H), 3.17-3.03 (m, 4H), 2.48 (s, 6H), 2.25 (s, 3H), 1.68-1.47 (m, 4H), 0.86 (td,  $J = 7.3, 0.7$  Hz, 6H).

**<sup>13</sup>C NMR** (75 MHz,  $CDCl_3$ )  $\delta$  164.4, 144.4, 138.0, 137.2, 135.2, 133.7, 131.3, 130.4, 130.0, 127.1, 116.8, 74.3, 50.0, 22.0, 21.0, 20.7, 11.3.

**HRMS** (ESI)  $m/z$  calculated for  $C_{25}H_{33}NNaO_4S$   $[M+Na]^+$ : 466.2023, found: 466.2019.

**Optical Rotation:**  $[\alpha]_D^{31} = -48.0$  ( $c = 0.3$ ,  $CHCl_3$ , 86% ee).

**HPLC:** Daicel Chiralpak OD-H column (hexane/iPrOH = 90:10, flow rate: 1.0 mL/min,  $\lambda = 254$  nm,  $t_R(\text{major}) = 5.46$  min,  $t_R(\text{minor}) = 6.76$  min. ee = 86%.

**(1*S*)-1-(2,4,6-Trimethylphenyl)-prop-2-en-1-yl-(2*R*)-2-(5-methoxy-2-naphthyl)-propionate (3at)**

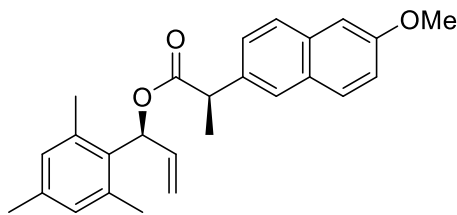

**3at**

Chemical Formula: C<sub>26</sub>H<sub>28</sub>O<sub>3</sub>

Exact Mass: 388.2038

Molecular Weight: 388.5070

The title compound was prepared from **1a** (53.0 mg, 0.3 mmol, 3 eq.) and **2at** (23.0 mg, 0.1 mmol, 1eq.) via general procedure. Purified by preparative TLC (eluent: EtOAc/PE = 1:5) furnished **3at** (26.8 mg, 69% yield) as yellow oil. Dr > 19:1, determined by crude <sup>1</sup>H NMR.

<sup>1</sup>H NMR (300 MHz, CDCl<sub>3</sub>) δ 7.62 (d, *J* = 8.5 Hz, 1H), 7.55 (d, *J* = 8.7 Hz, 1H), 7.45-7.44 (m, 1H), 7.27 (dd, *J* = 8.5, 1.8 Hz, 1H), 7.13-7.07 (m, 2H), 6.70-6.62 (m, 3H), 6.03 (ddd, *J* = 17.3, 10.6, 4.4 Hz, 1H), 5.16-4.98 (m, 2H), 3.96-3.79 (m, 1H), 3.89 (s, 3H), 2.20 (s, 3H), 2.16 (s, 6H), 1.56 (d, *J* = 7.2 Hz, 3H).

<sup>13</sup>C NMR (75 MHz, CDCl<sub>3</sub>) δ 173.7, 157.6, 137.4, 137.2, 135.7, 135.4, 133.7, 131.5, 129.7, 129.4, 129.0, 127.2, 126.4, 126.0, 118.9, 116.1, 105.6, 73.6, 55.3, 45.8, 20.9, 20.3, 18.8.

HRMS (ESI) *m/z* calculated for C<sub>26</sub>H<sub>28</sub>NaO<sub>3</sub> [M+Na]<sup>+</sup>: 411.1931, found: 411.1926.

Optical Rotation: [α]<sub>D</sub><sup>31</sup> = -158.0 (*c* = 0.1, CHCl<sub>3</sub>).

**(1S)-1-Phenylprop-2-en-1-yl 1-naphthaleneacetate (3ba)**

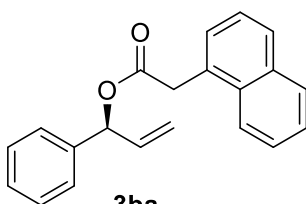

**3ba**

Chemical Formula: C<sub>21</sub>H<sub>18</sub>O<sub>2</sub>

Exact Mass: 302.1307

Molecular Weight: 302.3730

The title compound was prepared from **1b** (40.0 mg, 0.3 mmol, 3 eq.) and **2a** (18.6 mg, 0.1 mmol, 1eq.) via general procedure. Preparative TLC (eluent: EtOAc/PE = 1:10) furnished **3ba** (10.9 mg, 36% yield, 96% ee) as colorless oil.

**<sup>1</sup>H NMR** (400 MHz, CDCl<sub>3</sub>) δ 8.01-7.90 (m, 1H), 7.89-7.82 (m, 1H), 7.79 (dd, *J* = 6.9, 2.3 Hz, 1H), 7.53-7.38 (m, 4H), 7.32-7.17 (m, 5H), 6.26 (d, *J* = 5.8 Hz, 1H), 5.93 (ddd, *J* = 17.2, 10.3, 5.9 Hz, 1H), 5.16 (dd, *J* = 9.7, 6.3 Hz, 2H), 4.13 (s, 2H).

**<sup>13</sup>C NMR** (75 MHz, CDCl<sub>3</sub>) δ 170.6, 138.8, 136.1, 133.9, 132.2, 130.6, 128.8, 128.6, 128.2, 128.1, 127.2, 126.4, 125.9, 125.6, 124.0, 117.1, 76.7, 39.5.

**HRMS** (ESI) *m/z* calculated for C<sub>21</sub>H<sub>22</sub>NO<sub>2</sub> [M+NH<sub>4</sub>]<sup>+</sup>: 320.1645, found: 320.1641.

**Optical Rotation:** [ $\alpha$ ]<sub>D</sub><sup>31</sup> = -15.0 (*c* = 0.3, CHCl<sub>3</sub>, 96% ee).

**HPLC:** Daicel Chiralpak OD-H column (hexane/*i*PrOH = 98:2, flow rate: 1.0 mL/min,  $\lambda$  = 224 nm, *t*<sub>R</sub>(major) = 12.11 min, *t*<sub>R</sub> (minor) = 9.83 min. ee = 96%.

**(*S*)-1-(2-Methylphenyl)-prop-2-en-1-yl-1-naphthaleneacetate (3ca)**

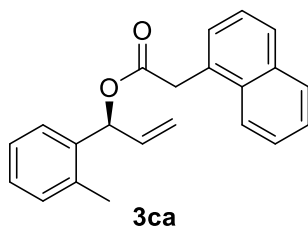

Chemical Formula: C<sub>22</sub>H<sub>20</sub>O<sub>2</sub>

Exact Mass: 316.1463

Molecular Weight: 316.4000

The title compound was prepared from **1c** (45.0 mg, 0.3 mmol, 3 eq.) and **2a** (18.6 mg, 0.1 mmol, 1eq.) via general procedure. Preparative TLC (eluent: EtOAc/PE = 1:10) furnished **3ca** (16.2 mg, 51% yield, 84% ee) as colorless oil.

**<sup>1</sup>H NMR** (400 MHz, CDCl<sub>3</sub>) δ 7.99-7.89 (m, 1H), 7.89-7.82 (m, 1H), 7.81-7.75 (m, 1H), 7.50-7.43 (m, 2H), 7.42-7.35 (m, 2H), 7.20-7.04 (m, 4H), 6.43 (d, *J* = 5.6 Hz, 1H), 5.90 (ddd, *J* = 17.1, 10.5, 5.6 Hz, 1H), 5.13 (dt, *J* = 10.5, 1.2 Hz, 1H), 5.07 (dt, *J* = 17.2, 1.3 Hz, 1H), 4.12 (s, 2H), 2.27 (s, 3H).

**<sup>13</sup>C NMR** (100 MHz, CDCl<sub>3</sub>) δ 170.6, 136.9, 135.8, 135.5, 133.9, 132.2, 130.6, 128.8, 128.20, 128.16, 128.07, 126.9, 126.4, 126.2, 125.9, 125.6, 124.0, 117.1, 74.1, 39.5, 19.2.

**HRMS** (ESI) calculated for C<sub>22</sub>H<sub>24</sub>NO<sub>2</sub> [M+NH<sub>4</sub>]<sup>+</sup>: 334.1802, found: 334.1797.

**Optical Rotation:** [ $\alpha$ ]<sub>D</sub><sup>31</sup> = -47.6 (*c* = 0.3, CHCl<sub>3</sub>, 84% ee).

**HPLC:** The enantiomeric excess was determined by HPLC analysis on a Daicel Chiralpak IC column (hexane/*i*PrOH = 98:2), flow rate: 1.0 mL/min,  $\lambda$  = 234 nm, *t*<sub>R</sub>(major) = 7.38 min, *t*<sub>R</sub> (minor) = 6.32 min. ee = 84%.

**(1*S*)-1-(2-Ethylphenyl)-prop-2-en-1-yl-1-naphthaleneacetate (3da)**

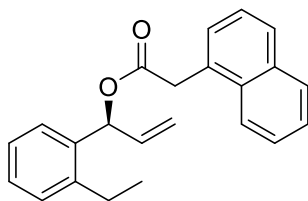

**3da**

Chemical Formula: C<sub>23</sub>H<sub>22</sub>O<sub>2</sub>

Exact Mass: 330.1620

Molecular Weight: 330.4270

The title compound was prepared from **1d** (47.0 mg, 0.3 mmol, 3 eq.) and **2a** (18.6 mg, 0.1 mmol, 1eq.) via general procedure. Preparative TLC (eluent: EtOAc/PE = 1:10) furnished **3da** (21.0 mg, 63% yield, 94% ee) as colorless oil.

**<sup>1</sup>H NMR** (400 MHz, CDCl<sub>3</sub>) δ 7.97-7.89 (m, 1H), 7.88-7.77 (m, 2H), 7.50-7.36 (m, 4H), 7.25-7.07 (m, 4H), 6.51 (d, *J* = 5.4 Hz, 1H), 5.93 (ddd, *J* = 17.1, 10.5, 5.4 Hz, 1H), 5.15-5.04 (m, 2H), 4.22-3.99 (m, 2H), 2.77-2.52 (m, 2H), 1.17 (t, *J* = 7.6 Hz, 3H).

**<sup>13</sup>C NMR** (100 MHz, CDCl<sub>3</sub>) δ 170.6, 141.8, 136.3, 136.3, 133.9, 132.2, 130.6, 128.79, 128.75, 128.32, 128.19, 128.16, 127.32, 126.4, 126.2, 125.9, 125.6, 124.0, 116.9, 73.4, 39.5, 25.5, 15.4.

**HRMS** (ESI) calculated for C<sub>23</sub>H<sub>26</sub>NO<sub>2</sub> [M+NH<sub>4</sub>]<sup>+</sup>: 348.1958, found: 348.1954.

**Optical Rotation:** [ $\alpha$ ]<sub>D</sub><sup>31</sup> = -81.0 (*c* = 0.1, CHCl<sub>3</sub>, 94% ee).

**HPLC:** The enantiomeric excess was determined by HPLC analysis on a Daicel Chiralpak IC column (hexane/*i*PrOH = 95:5), flow rate: 1.0 mL/min,  $\lambda$  = 225 nm, *t*<sub>R</sub>(major) = 5.32 min, *t*<sub>R</sub> (minor) = 4.86 min. ee = 94%.

**(1*S*)-1-(2-biphenyl)-prop-2-en-1-yl-1-naphthaleneacetate (3ea)**

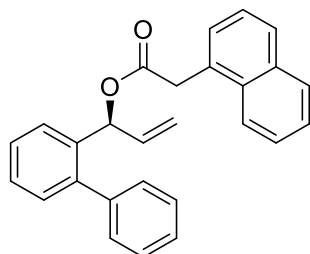

**3ea**

Chemical Formula: C<sub>27</sub>H<sub>22</sub>O<sub>2</sub>

Exact Mass: 378.1620

Molecular Weight: 378.4710

The title compound was prepared from **1e** (63.0 mg, 0.3 mmol, 3 eq.) and **2a** (18.6 mg, 0.1 mmol, 1eq.) via general procedure. Preparative TLC (eluent: EtOAc/PE = 1:10) furnished **3ea** (26.7 mg, 71% yield, >99% ee) as colorless oil.

<sup>1</sup>H NMR (400 MHz, CDCl<sub>3</sub>) δ 8.01-7.94 (m, 1H), 7.93-7.86 (m, 1H), 7.83 (d, *J* = 7.9 Hz, 1H), 7.57-7.49 (m, 2H), 7.48-7.19 (m, 11H), 6.34 (d, *J* = 5.5 Hz, 1H), 5.88 (ddd, *J* = 16.2, 10.5, 5.4 Hz, 1H), 5.09 (d, *J* = 10.5 Hz, 1H), 4.91 (d, *J* = 17.2 Hz, 1H), 4.11 (d, *J* = 1.4 Hz, 2H). <sup>13</sup>C NMR (100 MHz, CDCl<sub>3</sub>) δ 170.2, 141.5, 140.5, 136.5, 136.4, 133.9, 132.2, 130.6, 130.1, 129.3, 128.8, 128.3, 128.2, 127.9, 127.7, 127.4, 126.9, 126.4, 125.9, 125.6, 124.0, 116.9, 74.1, 39.4.

**HRMS** (ESI) calculated for C<sub>27</sub>H<sub>26</sub>NO<sub>2</sub> [M+NH<sub>4</sub>]<sup>+</sup>: 396.1958, found: 396.1957.

**Optical Rotation:** [ $\alpha$ ]<sub>D</sub><sup>31</sup> = -12.0 (*c* = 0.5, CHCl<sub>3</sub>, 99% ee).

**HPLC:** The enantiomeric excess was determined by HPLC analysis on a Daicel Chiralpak IC column (hexane/iPrOH = 95:5), flow rate: 1.0 mL/min,  $\lambda$  = 225 nm, *t*<sub>R</sub>(major) = 5.63 min, *t*<sub>R</sub> (minor) = 5.05 min. ee = 99%.

**(1*S*)-1-(2-(*p*-Methoxy)-biphenyl)-prop-2-en-1-yl-1-naphthaleneacetate (3fa)**

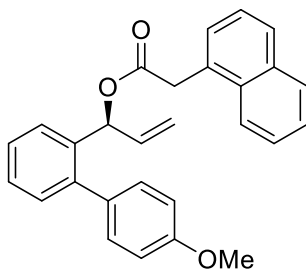

**3fa**

Chemical Formula: C<sub>28</sub>H<sub>24</sub>O<sub>3</sub>

Exact Mass: 408.1725

Molecular Weight: 408.4970

The title compound was prepared from **1f** (72.0 mg, 0.3 mmol, 3 eq.) and **2a** (18.6 mg, 0.1 mmol, 1eq.) via general procedure. Preparative TLC (eluent: EtOAc/PE = 1:10) furnished **3fa** (29.0 mg, 71% yield, 99% ee) as colorless oil.

<sup>1</sup>H NMR (400 MHz, CDCl<sub>3</sub>) δ 7.94-7.91 (m, 1H), 7.89-7.82 (m, 1H), 7.78 (d, *J* = 7.8 Hz, 1H), 7.52-7.35 (m, 4H), 7.31-7.14 (m, 6H), 6.85 (d, *J* = 8.6 Hz, 2H), 6.30 (d, *J* = 5.4 Hz, 1H), 5.85 (ddd, *J* = 16.9, 10.5, 5.5 Hz, 1H), 5.05 (d, *J* = 10.5 Hz, 1H), 4.88 (d, *J* = 17.2 Hz, 1H), 4.09 (d, *J* = 15.5 Hz, 1H), 4.04 (d, *J* = 15.5 Hz, 1H), 3.79 (s, 3H).

<sup>13</sup>C NMR (101 MHz, CDCl<sub>3</sub>) δ 170.2, 158.9, 141.2, 136.6, 136.4, 133.9, 132.8, 132.2, 130.6, 130.4, 130.3, 128.8, 128.2, 127.9, 127.5, 127.0, 126.4, 125.9, 125.6, 124.1, 116.9, 113.7, 74.2, 55.4, 39.5.

**HRMS** (ESI) calculated for  $C_{28}H_{24}NaO_3$   $[M+Na]^+$ : 431.1618, found: 431.1616.

**Optical Rotation:**  $[\alpha]_D^{31} = -5.9$  ( $c = 0.3$ ,  $CHCl_3$ , 99% ee).

**HPLC:** Daicel Chiralpak OD-H column (hexane/iPrOH = 90:10, flow rate: 1.0 mL/min,  $\lambda = 224$  nm,  $t_R(\text{major}) = 9.80$  min,  $t_R(\text{minor}) = 9.00$  min. ee = 99%.

**(1S)-1-(3-phenoxy-phenyl)-prop-2-en-1-yl-1-naphthaleneacetate (3ga)**

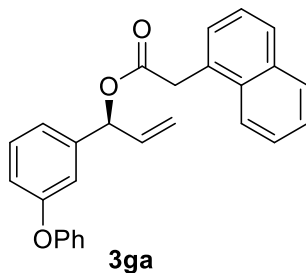

Chemical Formula:  $C_{27}H_{22}O_3$

Exact Mass: 394.1569

Molecular Weight: 394.4700

The title compound was prepared from **1g** (68.0 mg, 0.3 mmol, 3 eq.) and **2a** (18.6 mg, 0.1 mmol, 1eq.) via general procedure. Preparative TLC (eluent: EtOAc/PE = 1:10) furnished **3ga** (21.3 mg, 54% yield, 96% ee) as colorless oil.

**$^1H$  NMR** (400 MHz,  $CDCl_3$ )  $\delta$  8.00-7.90 (m, 1H), 7.87-7.82 (m, 1H), 7.80-7.76 (m, 1H), 7.50-7.43 (m, 2H), 7.43-7.37 (m, 2H), 7.35-7.29 (m, 2H), 7.25-7.19 (m, 1H), 7.11 (t,  $J = 7.4$  Hz, 1H), 6.98-6.91 (m, 4H), 6.90-6.85 (m, 1H), 6.22 (d,  $J = 5.9$  Hz, 1H), 5.89 (ddd,  $J = 17.3, 10.2, 5.9$  Hz, 1H), 5.20-5.07 (m, 2H), 4.12 (s, 2H).

**$^{13}C$  NMR** (100 MHz,  $CDCl_3$ )  $\delta$  170.5, 157.4, 157.1, 140.9, 135.8, 133.9, 132.2, 130.5, 129.9, 128.8, 128.3, 128.1, 126.5, 125.9, 125.6, 123.9, 123.5, 121.9, 118.9, 118.4, 117.6, 117.4, 76.3, 39.5.

**HRMS** (ESI) calculated for  $C_{27}H_{26}NO_3$   $[M+NH_4]^+$ : 412.1907, found: 412.1906.

**Optical Rotation:**  $[\alpha]_D^{31} = -58.4$  ( $c = 0.2$ ,  $CHCl_3$ , 96% ee).

**HPLC:** The enantiomeric excess was determined by HPLC analysis on a Daicel Chiralpak IC column (hexane/iPrOH = 98:2), flow rate: 1.0 mL/min,  $\lambda = 234$  nm,  $t_R(\text{major}) = 12.50$  min,  $t_R(\text{minor}) = 8.63$  min. ee = 96%.

**(1S)-1-(4-biphenyl)-prop-2-en-1-yl-1-naphthaleneacetate (3ha)**



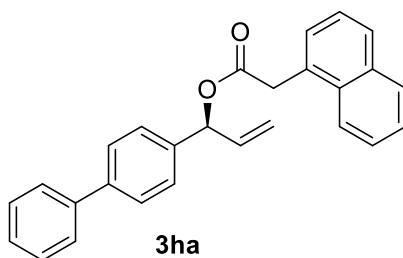

Chemical Formula: C<sub>27</sub>H<sub>22</sub>O<sub>2</sub>

Exact Mass: 378.1620

Molecular Weight: 378.4710

The title compound was prepared from **1h** (63.0 mg, 0.3 mmol, 3 eq.) and **2a** (18.6 mg, 0.1 mmol, 1 eq.) via general procedure. Preparative TLC (eluent: EtOAc/PE = 1:10) furnished **3ha** (24.1 mg, 64% yield, 87% ee) as colorless oil.

**<sup>1</sup>H NMR** (400 MHz, CDCl<sub>3</sub>) δ 7.99-7.91 (m, 1H), 7.90-7.83 (m, 1H), 7.82-7.76 (m, 1H), 7.55 (d, *J* = 7.3 Hz, 2H), 7.51-7.39 (m, 8H), 7.34 (t, *J* = 7.3 Hz, 1H), 7.27 (d, *J* = 8.2 Hz, 2H), 6.30 (d, *J* = 5.8 Hz, 1H), 6.10-5.84 (m, 1H), 5.32-5.04 (m, 2H), 4.14 (s, 2H).

**<sup>13</sup>C NMR** (101 MHz, CDCl<sub>3</sub>) δ 170.6, 141.2, 140.8, 137.8, 136.0, 133.9, 132.2, 130.6, 128.9, 128.8, 128.22, 128.16, 127.6, 127.5, 127.4, 127.2, 126.4, 125.9, 125.6, 124.0, 117.2, 76.5, 39.6.

**HRMS** (ESI) calculated for C<sub>27</sub>H<sub>22</sub>NaO<sub>2</sub> [M+Na]<sup>+</sup>: 401.1512, found: 401.1505.

**Optical Rotation:** [α]<sub>D</sub><sup>31</sup> = -33.0 (*c* = 0.2, CHCl<sub>3</sub>, 87% ee).

**HPLC:** The enantiomeric excess was determined by HPLC analysis on a Daicel Chiralpak AD-H column (hexane/iPrOH = 99:1), flow rate: 1.0 mL/min, λ = 234 nm, *t*<sub>R</sub>(major) = 20.30 min, *t*<sub>R</sub> (minor) = 14.53 min. ee = 87%.

**(1S)-1-(3,5-dimethyl-phenyl)-prop-2-en-1-yl-1-naphthaleneacetate (3ia)**

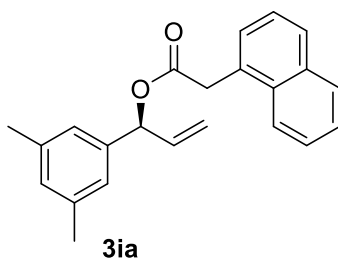

Chemical Formula: C<sub>23</sub>H<sub>22</sub>O<sub>2</sub>

Exact Mass: 330.1620

Molecular Weight: 330.4270

The title compound was prepared from **1i** (49.0 mg, 0.3 mmol, 3 eq.) and **2a** (18.6 mg, 0.1 mmol, 1eq.) via general procedure. Preparative TLC (eluent: EtOAc/PE = 1:8) furnished **3ia** (16.6 mg, 50% yield, 92% ee) as colorless oil.

**<sup>1</sup>H NMR** (300 MHz, CDCl<sub>3</sub>) δ 8.10-7.92 (m, 1H), 7.90-7.73 (m, 2H), 7.59-7.31 (m, 4H), 6.87 (s, 1H), 6.76 (s, 2H), 6.18 (d, *J* = 6.0 Hz, 1H), 5.90 (ddd, *J* = 17.1, 10.4, 6.0 Hz, 1H), 5.20-5.11 (m, 2H), 4.12 (s, 2H), 2.21 (s, 6H).

**<sup>13</sup>C NMR** (75 MHz, CDCl<sub>3</sub>) δ 170.6, 138.8, 138.1, 136.3, 133.9, 132.2, 130.7, 129.8, 128.8, 128.2, 126.4, 125.9, 125.6, 124.7, 124.1, 116.8, 76.80, 39.6, 21.3.

**HRMS** (ESI) calculated for C<sub>23</sub>H<sub>26</sub>NO<sub>2</sub> [M+NH<sub>4</sub>]<sup>+</sup>: 348.1958, found: 348.1954.

**Optical Rotation:** [α]<sub>D</sub><sup>31</sup> = -33.1 (*c* = 0.2, CHCl<sub>3</sub>, 92% ee).

**HPLC:** The enantiomeric excess was determined by HPLC analysis on a Daicel Chiralpak IC column (hexane/iPrOH = 90:10), flow rate: 1.0 mL/min, λ = 254 nm, *t*<sub>R</sub>(major) = 8.57 min, *t*<sub>R</sub>(minor) = 5.49 min. ee = 92%.

**(1*S*)-1-(2,6-dimethyl-phenyl)-prop-2-en-1-yl-1-naphthaleneacetate (3ja)**

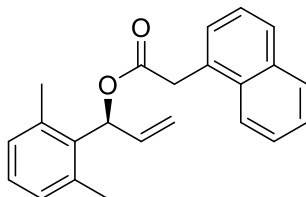

**3ja**

Chemical Formula: C<sub>23</sub>H<sub>22</sub>O<sub>2</sub>

Exact Mass: 330.1620

Molecular Weight: 330.4270

The title compound was prepared from **1j** (49.0 mg, 0.3 mmol, 3 eq.) and **2a** (18.6 mg, 0.1 mmol, 1eq.) via general procedure. Preparative TLC (eluent: EtOAc/PE = 1:10) furnished **3ja** (24.7 mg, 75% yield, 97% ee) as colorless oil.

**<sup>1</sup>H NMR** (400 MHz, CDCl<sub>3</sub>) δ 7.92-1.89 (m, 1H), 7.87-7.82 (m, 1H), 7.78 (d, *J* = 7.8 Hz, 1H), 7.51-7.33 (m, 4H), 7.08-7.03 (m, 1H), 6.93 (d, *J* = 7.5 Hz, 2H), 6.73 (dt, *J* = 4.2, 2.1 Hz, 1H), 5.95 (ddd, *J* = 17.3, 10.6, 4.2 Hz, 1H), 5.07 (ddd, *J* = 10.7, 2.0, 1.2 Hz, 1H), 4.92 (ddd, *J* = 17.3, 1.9, 1.2 Hz, 1H), 4.10 (s, 3H), 2.25 (s, 6H).

**<sup>13</sup>C NMR** (100 MHz, CDCl<sub>3</sub>) δ 170.8, 137.3, 135.0, 134.4, 133.9, 132.2, 130.6, 129.0, 128.8, 128.18, 128.16, 128.09, 126.4, 125.9, 125.5, 123.8, 116.3, 73.6, 39.5, 20.5.

**HRMS** (ESI) calculated for C<sub>23</sub>H<sub>26</sub>NO<sub>2</sub> [M+NH<sub>4</sub>]<sup>+</sup>: 348.1958, found: 348.1955.

**Optical Rotation:**  $[\alpha]_D^{31} = -73.2$  ( $c = 0.2$ ,  $\text{CHCl}_3$ , 97% ee).

**HPLC:** The enantiomeric excess was determined by HPLC analysis on a Daicel Chiralpak IA column (hexane/*i*PrOH = 98:2), flow rate: 1.0 mL/min,  $\lambda = 225$  nm,  $t_R(\text{major}) = 5.66$  min,  $t_R(\text{minor}) = 5.19$  min. ee = 97%.

**(*IS*)-1-(2,4,6-Triisopropyl-phenyl)-prop-2-en-1-yl-1-naphthaleneacetate (3ka)**

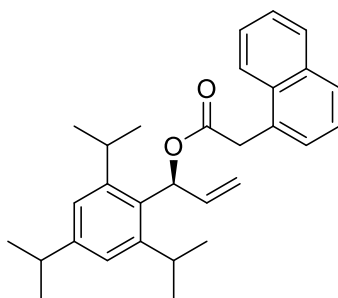

**3ka**

Chemical Formula:  $\text{C}_{30}\text{H}_{36}\text{O}_2$

Exact Mass: 428.2715

Molecular Weight: 428.6160

The title compound was prepared from **1k** (78.0 mg, 0.3 mmol, 3 eq.) and **2a** (18.6 mg, 0.1 mmol, 1eq.) via general procedure. Preparative TLC (eluent: EtOAc/PE = 1:10) furnished **3ka** (30.4 mg, 71% yield, 97% ee) as colorless oil.

**$^1\text{H NMR}$**  (400 MHz,  $\text{CDCl}_3$ )  $\delta$  8.03-7.90 (m, 1H), 7.89-7.83 (m, 1H), 7.83-7.73 (m, 1H), 7.56-7.35 (m, 4H), 7.06-6.96 (m, 3H), 6.03 (ddd,  $J = 17.3, 10.7, 3.7$  Hz, 1H), 5.16-4.92 (m, 1H), 4.83 (d,  $J = 17.3$  Hz, 1H), 4.12 (d,  $J = 15.6$  Hz, 1H), 4.06 (d,  $J = 15.6$  Hz, 1H), 3.46-3.22 (m, 2H), 2.87 (dt,  $J = 13.8, 6.9$  Hz, 1H), 1.25 (d,  $J = 6.9$  Hz, 6H), 1.17 (d,  $J = 6.8$  Hz, 12H).

**$^{13}\text{C NMR}$**  (100 MHz,  $\text{CDCl}_3$ )  $\delta$  171.1, 148.9, 137.8, 134.0, 132.2, 130.6, 129.6, 128.8, 128.3, 128.2, 126.4, 125.9, 125.6, 123.9, 116.2, 72.1, 39.7, 34.3, 29.8, 25.2, 24.1, 23.9.

**HRMS** (ESI) calculated for  $\text{C}_{30}\text{H}_{36}\text{NaO}_2$   $[\text{M}+\text{Na}]^+$ : 451.2608, found: 451.2598.

**Optical Rotation:**  $[\alpha]_D^{31} = -78.1$  ( $c = 0.25$ ,  $\text{CHCl}_3$ , 97% ee).

**HPLC:** The enantiomeric excess was determined by HPLC analysis on a Daicel Chiralpak OD-H column (hexane/*i*PrOH = 99:1), flow rate: 1.0 mL/min,  $\lambda = 224$  nm,  $t_R(\text{major}) = 5.98$  min,  $t_R(\text{minor}) = 5.09$  min. ee = 97%.

**(*IS*)-1-(2,3,4,5,6-Pentamethyl-phenyl)-prop-2-en-1-yl-1-naphthaleneacetate (3la)**

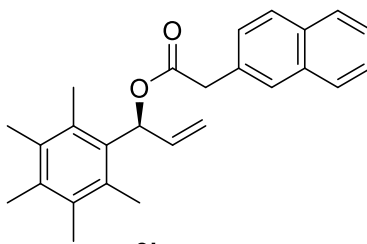

**3la**

Chemical Formula: C<sub>26</sub>H<sub>28</sub>O<sub>2</sub>

Exact Mass: 372.2089

Molecular Weight: 372.5080

The title compound was prepared from **11** (61.0 mg, 0.3 mmol, 3 eq.) and **2a** (18.6 mg, 0.1 mmol, 1 eq.) via general procedure. Preparative TLC (eluent: EtOAc/PE = 1:8) furnished **3la** (21.5 mg, 58% yield, 94% ee) as colorless oil.

**<sup>1</sup>H NMR** (300 MHz, CDCl<sub>3</sub>) δ 8.03-7.69 (m, 3H), 7.55-7.29 (m, 4H), 6.89 (dt, *J* = 4.2, 2.2 Hz, 1H), 5.99 (ddd, *J* = 17.3, 10.6, 4.1 Hz, 1H), 5.05 (ddd, *J* = 10.6, 2.2, 1.3 Hz, 1H), 4.90 (ddd, *J* = 17.3, 2.1, 1.3 Hz, 1H), 4.07 (s, 2H), 2.21 (s, 3H), 2.15 (s, 6H), 2.14 (s, 6H).

**<sup>13</sup>C NMR** (75 MHz, CDCl<sub>3</sub>) δ 170.9, 136.3, 135.2, 133.9, 133.2, 132.9, 132.3, 132.2, 130.8, 128.8, 128.2, 128.1, 126.3, 125.8, 125.5, 123.9, 116.1, 74.4, 39.6, 17.3, 17.2, 16.8.

**HRMS** (ESI) calculated for C<sub>26</sub>H<sub>28</sub>NaO<sub>2</sub> [M+Na]<sup>+</sup>: 395.1982, found: 395.1975.

**Optical Rotation:** [α]<sub>D</sub><sup>31</sup> = -44.2 (*c* = 0.1, CHCl<sub>3</sub>, 94% ee).

**HPLC:** Daicel Chiralpak ID column (hexane/iPrOH = 99:1, flow rate: 1.0 mL/min, λ = 224 nm, *t*<sub>R</sub>(major) = 6.63 min, *t*<sub>R</sub>(minor) = 5.79 min. ee = 94%.

**(1S)-1-(1-naphthyl)-prop-2-en-1-yl-1-naphthaleneacetate (3ma)**

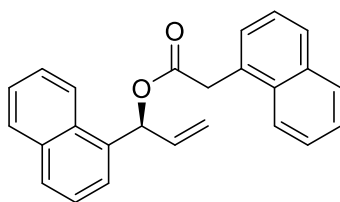

**3ma**

Chemical Formula: C<sub>25</sub>H<sub>20</sub>O<sub>2</sub>

Exact Mass: 352.1463

Molecular Weight: 352.4330

The title compound was prepared from **1m** (55.0 mg, 0.3 mmol, 3 eq.) and **2a** (18.6 mg, 0.1 mmol, 1 eq.) via general procedure. Preparative TLC (eluent: EtOAc/PE = 1:10) furnished **3ma** (24.3 mg, 69% yield, 95% ee) as colorless oil.

**<sup>1</sup>H NMR** (400 MHz, CDCl<sub>3</sub>) δ 7.93 (dd, *J* = 17.4, 8.4 Hz, 2H), 7.87-7.72 (m, 4H), 7.49-7.30 (m,

8H), 6.96 (d,  $J = 5.2$  Hz, 1H), 6.09 (ddd,  $J = 17.1, 10.6, 5.3$  Hz, 1H), 5.19-5.12 (m, 2H), 4.14 (s, 2H).

$^{13}\text{C NMR}$  (100 MHz,  $\text{CDCl}_3$ )  $\delta$  170.7, 135.8, 134.4, 134.0, 133.9, 132.2, 130.7, 130.5, 129.1, 128.85, 128.78, 128.22, 126.42, 126.33, 125.89, 125.82, 125.60, 125.56, 125.30, 123.98, 117.4, 74.5, 39.5.

**HRMS** (ESI) calculated for  $\text{C}_{25}\text{H}_{20}\text{NaO}_2$   $[\text{M}+\text{Na}]^+$ : 375.1356, found: 375.1355.

**Optical Rotation:**  $[\alpha]_{\text{D}}^{31} = -73.1$  ( $c = 0.1$ ,  $\text{CHCl}_3$ , 87% ee).

**HPLC:** The enantiomeric excess was determined by HPLC analysis on a Daicel Chiralpak IC column (hexane/*i*PrOH = 90:10), flow rate: 1.0 mL/min,  $\lambda = 254$  nm,  $t_{\text{R}}(\text{major}) = 8.97$  min,  $t_{\text{R}}(\text{minor}) = 6.82$  min. ee = 87%.

**(*S*)-1-(2-naphthyl)-prop-2-en-1-yl-1-naphthaleneacetate (**3na**)**

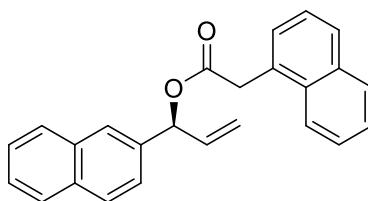

**3na**

Chemical Formula:  $\text{C}_{25}\text{H}_{20}\text{O}_2$

Exact Mass: 352.1463

Molecular Weight: 352.4330

The title compound was prepared from **1n** (55.0 mg, 0.3 mmol, 3 eq.) and **2a** (18.6 mg, 0.1 mmol, 1eq.) via general procedure. Preparative TLC (eluent: EtOAc/PE = 1:10) furnished **3na** (24.2 mg, 69% yield, 95% ee) as colorless oil.

$^1\text{H NMR}$  (400 MHz,  $\text{CDCl}_3$ )  $\delta$  7.96 (d,  $J = 8.1$  Hz, 1H), 7.88-7.84 (m, 1H), 7.82-7.70 (m, 3H), 7.69-7.64 (m, 1H), 7.60 (s, 1H), 7.51-7.38 (m, 6H), 7.29 (dd,  $J = 8.5, 1.6$  Hz, 1H), 6.42 (d,  $J = 5.8$  Hz, 1H), 6.06-5.89 (m, 1H), 5.23-5.16 (m, 2H), 4.15 (s, 2H).

$^{13}\text{C NMR}$  (100 MHz,  $\text{CDCl}_3$ )  $\delta$  170.6, 136.12, 136.07, 133.9, 133.19, 133.15, 132.2, 130.6, 128.8, 128.4, 128.23, 128.19, 127.74, 126.5, 126.3, 126.1, 125.9, 125.6, 124.9, 124.0, 117.4, 76.8, 39.6.

**HRMS** (ESI) calculated for  $\text{C}_{25}\text{H}_{20}\text{NaO}_2$   $[\text{M}+\text{Na}]^+$ : 375.1356, found: 375.1355.

**Optical Rotation:**  $[\alpha]_{\text{D}}^{31} = -45.0$  ( $c = 0.2$ ,  $\text{CHCl}_3$ , 95% ee).

**HPLC:** The enantiomeric excess was determined by HPLC analysis on a Daicel Chiralpak IC column (hexane/*i*PrOH = 90:10), flow rate: 1.0 mL/min,  $\lambda = 254$  nm,  $t_{\text{R}}(\text{major}) = 9.72$  min,  $t_{\text{R}}(\text{minor}) = 6.55$  min. ee = 95%.

## Further applications:

### The synthesis of compound 7

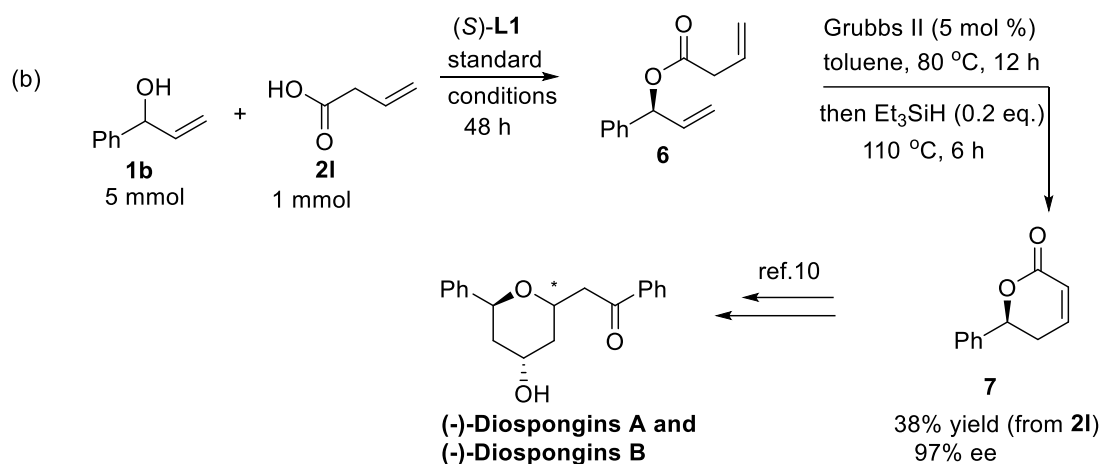

A flame dried round bottom flask was cooled to rt. and charged with  $[\text{Ir}(\text{cod})\text{Cl}]_2$  (26 mg, 40  $\mu\text{mol}$ , 4 mol %) and **(S)-L1** (80.0 mg, 160  $\mu\text{mol}$ , 16 mol %). The flask backfilled with argon gas three times. To the flask was added distilled  $\text{CH}_2\text{Cl}_2$  (10.0 mL), and stirred at rt. for 10 min. The allylic alcohols **1b** (670.0 mg, 5 mmol, 5.0 equiv), carboxylic acids **2I** (86 mg, 1 mmol, 1.0 equiv), 4AMS (400 mg) and HBr (40wt.% in water; 240 mg, 1.2 mmol, 120 mol%) were added. The flask was sealed and stirred at rt. for 48 h. Later, the solution was quenched with aq.  $\text{NaHCO}_3$  (50 mL) and extracted with  $\text{CH}_2\text{Cl}_2$  (3\* 50mL). The organic layer was dried over  $\text{Na}_2\text{SO}_4$  and concentrated by rotary evaporation. The crude product was fast purified by preparative TLC (eluent: EtOAc/PE = 1:10) to afford the ester **6**.

Follow the reported method: The ester **6** was all dissolved in toluene (5.0 mL) which was preheated to 80 °C, the Grubbs II (5 mol %) was added. After the substrate was fully consumed (monited by TLC, approx. 12 h), the  $\text{Et}_3\text{SiH}$  (17  $\mu\text{L}$ , 0.1 mmol, 0.2 eq.) was added, and the solution was heated to 110 °C for 6 h. the solvent were evaporated, and the residue was purified by chromatography on silica (eluent: hexane:EA = 3:1) to give lactone **7** (66.2 mg, 38% over yield from **2I**) as a powder. The  $^1\text{NMR}$  is consistant with those reported literatures.<sup>[3][4]</sup>

$^1\text{H NMR}$  (300 MHz,  $\text{CDCl}_3$ )  $\delta$  7.60-7.26 (m, 5H), 6.97 (ddd,  $J = 9.6, 5.1, 3.3$  Hz, 1H), 6.21-5.91 (m, 1H), 5.45 (dd,  $J = 10.2, 5.7$  Hz, 1H), 2.77-2.43 (m, 2H).

$^{13}\text{C NMR}$  (75 MHz,  $\text{CDCl}_3$ )  $\delta$  164.2, 145.0, 138.6, 128.8, 128.7, 126.2, 121.8, 79.4, 31.82.

**Optical Rotation:**  $[\alpha]_{\text{D}}^{31} = -227.0$  (c = 0.2 in  $\text{CHCl}_3$ , 97% ee); and the Ref. <sup>[4]</sup>:  $[\alpha]_{\text{D}}^{26} = -210$  (c = 0.755,  $\text{CHCl}_3$ , 92% ee)

**HPLC:** Daicel Chiralpak OD-H column (hexane/iPrOH = 90:10, flow rate: 1.0 mL/min,  $\lambda = 225$  nm,  $t_{\text{R}}(\text{major}) = 17.28$  min,  $t_{\text{R}}(\text{minor}) = 20.82$  min. ee = 97%.

## Reference

[1] A. Serra-Muns, A. Guérinot, S. Reymond, J. Cossy, *Chem. Commun.*, 2010, **46**, 4178.

[2] B. Schmidt, O. Kunz, *Synlett* 2012, **23**, 851.

[3] H.-J. Zhang, L. Yin, *J. Am. Chem. Soc.* 2018, **140**, 12270.

[4] A. Padarti, H. Han, *Org. Lett.* 2018, **20**, 1448

## HPLC Chromatograms

**Racemic sample 3aa:** HPLC (Daicel Chiralpak OD-H column (hexane/iPrOH = 99:1, flow rate: 1.0 mL/min,  $\lambda = 254$  nm)

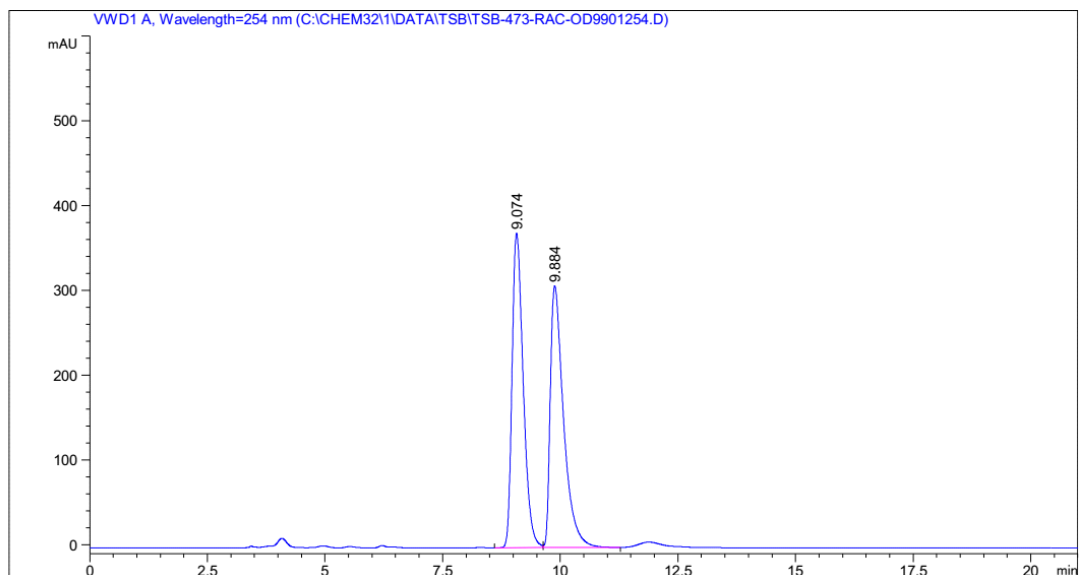

| Peak Name | RT [min] | Type | width [min] | Area [mAU*s] | Height [mAu] | Area ratio % |
|-----------|----------|------|-------------|--------------|--------------|--------------|
| 1         | 9.074    | BV   | 0.2532      | 6109.49170   | 370.83450    | 50.1618      |
| 2         | 9.884    | VB   | 0.2955      | 6070.07568   | 308.62259    | 49.8382      |

**Enantioenriched sample 3aa:**

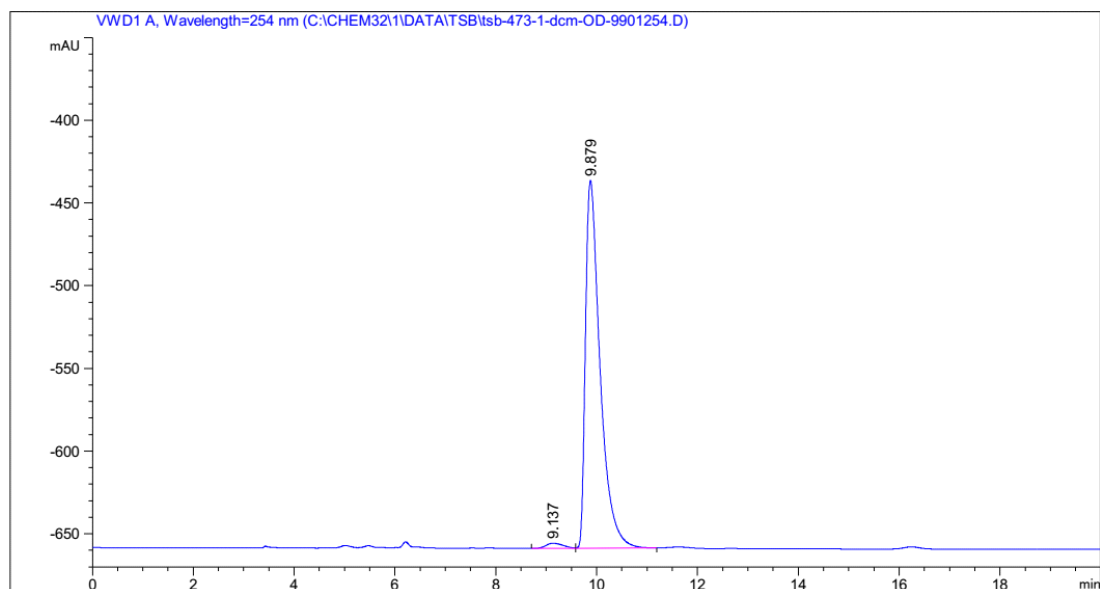

| Peak Name | RT [min] | Type | width [min] | Area [mAU*s] | Height [mAu] | Area ratio % |
|-----------|----------|------|-------------|--------------|--------------|--------------|
| 1         | 9.137    | BV   | 0.3725      | 71.31754     | 3.07603      | 1.5683       |
| 2         | 9.879    | VB   | 0.3020      | 4476.00195   | 222.23903    | 98.4317      |



**Racemic sample 3ab:** HPLC (Daicel Chiralpak IC column (hexane/iPrOH = 90:10, flow rate: 1.0 mL/min,  $\lambda = 254$  nm)

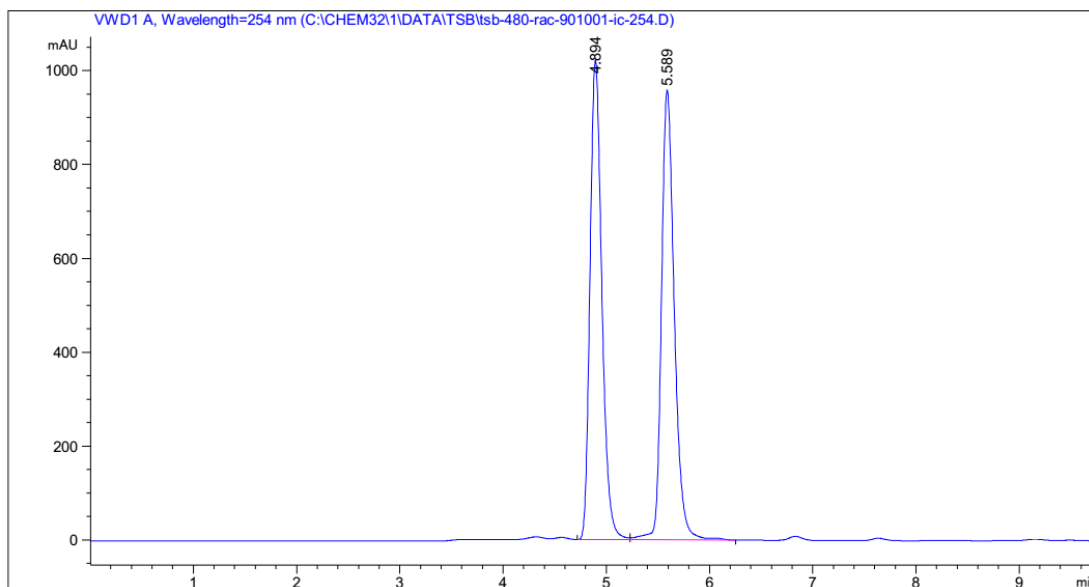

| Peak Name | RT [min] | Type | width [min] | Area [mAU*s] | Height [mAu] | Area ratio % |
|-----------|----------|------|-------------|--------------|--------------|--------------|
| 1         | 4.894    | BV   | 0.1229      | 8131.83154   | 1020.89941   | 49.4851      |
| 2         | 5.589    | VV R | 0.1317      | 8301.06641   | 958.75323    | 50.5149      |

**Enantioenriched sample 3ab:**

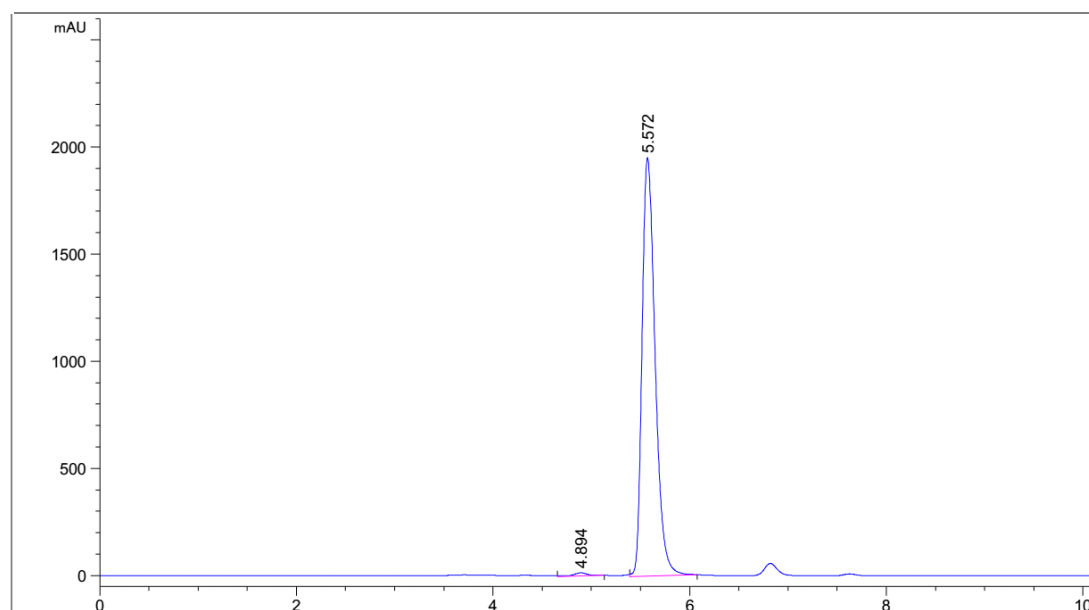

| Peak Name | RT [min] | Type | width [min] | Area [mAU*s] | Height [mAu] | Area ratio % |
|-----------|----------|------|-------------|--------------|--------------|--------------|
| 1         | 6.969    | MM   | 0.1974      | 162.44135    | 13.71311     | 0.9298       |
| 2         | 7.838    | MM   | 0.2937      | 1.73083e4    | 982.17554    | 99.0702      |

**Racemic sample 3ac:** HPLC (Daicel Chiralpak AD-H column (hexane/iPrOH = 99:1, flow rate: 1.0 mL/min,  $\lambda = 234$  nm)

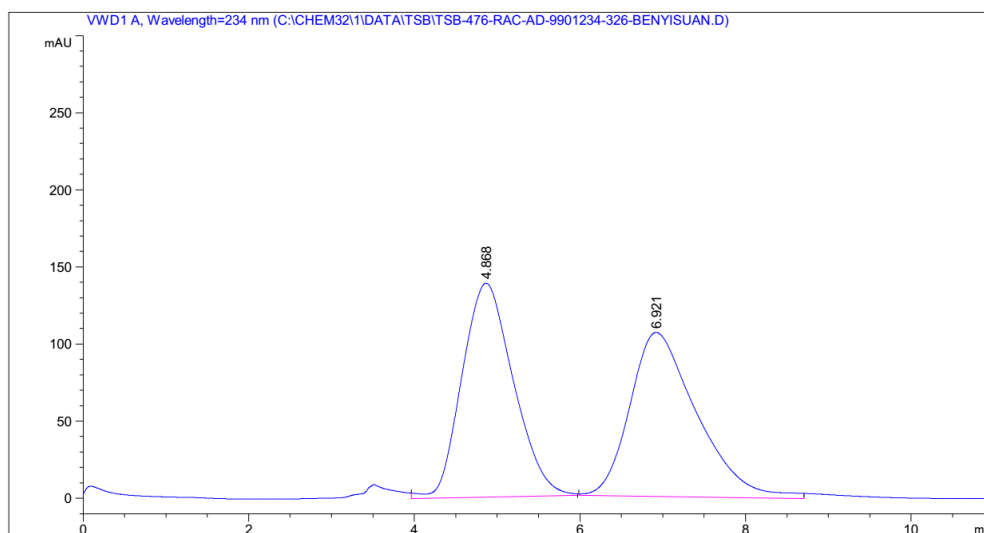

| Peak Name | RT [min] | Type | width [min] | Area [mAU*s] | Height [mAu] | Area ratio % |
|-----------|----------|------|-------------|--------------|--------------|--------------|
| 1         | 4.868    | MM   | 0.7178      | 5971.49365   | 138.65198    | 50.0457      |
| 2         | 6.921    | MM   | 0.9345      | 5960.58789   | 106.30811    | 49.9543      |

**Enantioenriched sample 3ac:**

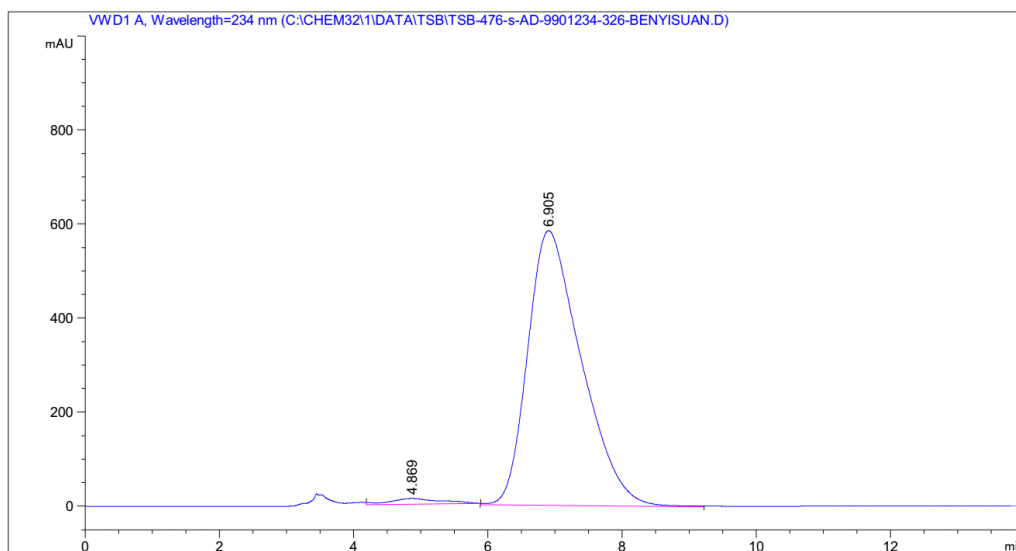

| Peak Name | RT [min] | Type | width [min] | Area [mAU*s] | Height [mAu] | Area ratio % |
|-----------|----------|------|-------------|--------------|--------------|--------------|
| 1         | 4.869    | MM   | 0.8707      | 622.35193    | 11.91269     | 1.8828       |
| 2         | 6.905    | MM   | 0.9257      | 3.24324e4    | 583.90521    | 98.1172      |

**Racemic sample 3ad:** HPLC (Daicel Chiralpak IE column (hexane/iPrOH = 90:10, flow rate: 1.0 mL/min,  $\lambda = 225$  nm)

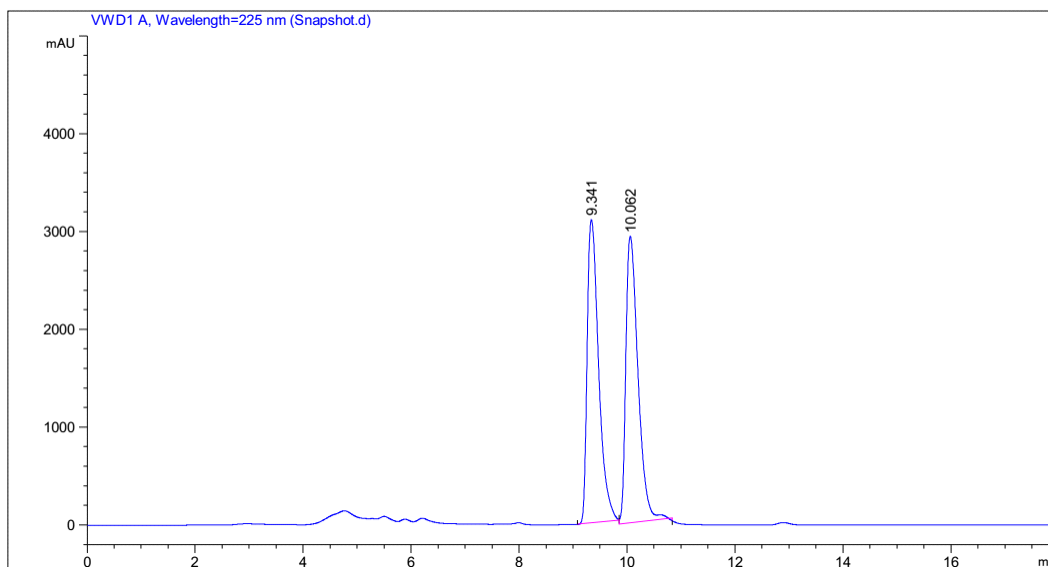

| Peak Name | RT [min] | Type | width [min] | Area [mAU*s] | Height [mAu] | Area ratio % |
|-----------|----------|------|-------------|--------------|--------------|--------------|
| 1         | 9.341    | MM   | 0.2454      | 4.56275e4    | 3098.51001   | 49.8984      |
| 2         | 10.062   | MM   | 0.2607      | 4.58134e4    | 2928.42969   | 50.1016      |

**Enantioenriched sample 3ad:**

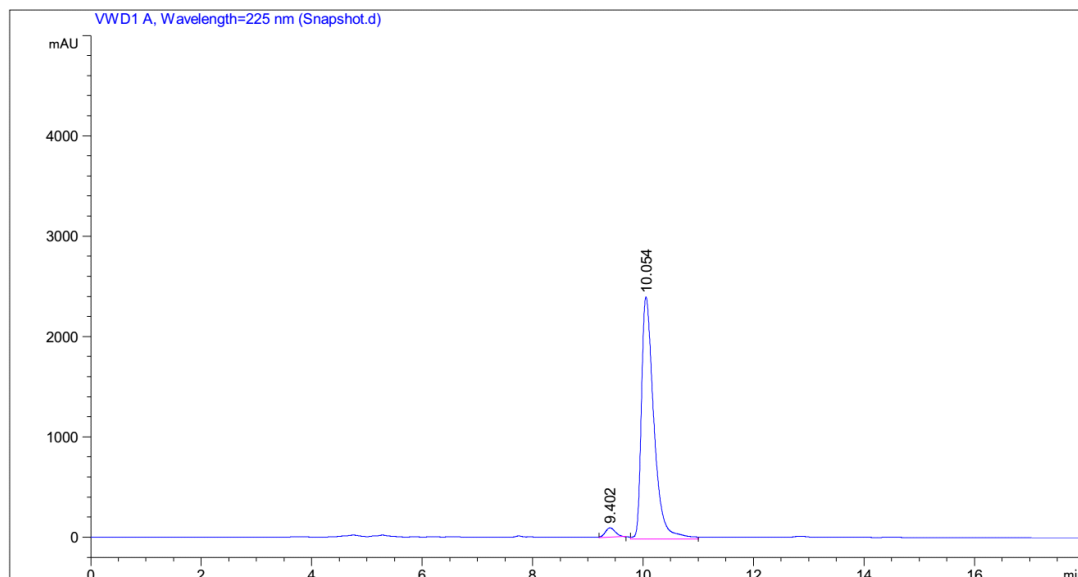

| Peak Name | RT [min] | Type | width [min] | Area [mAU*s] | Height [mAu] | Area ratio % |
|-----------|----------|------|-------------|--------------|--------------|--------------|
| 1         | 9.402    | MM   | 0.2058      | 1140.75317   | 92.36864     | 2.9442       |
| 2         | 10.054   | MM   | 0.2599      | 3.76055e4    | 2411.67773   | 97.0558      |

**Racemic sample 3ae:** HPLC (Daicel Chiralpak IC column (hexane/iPrOH = 90:10, flow rate: 1.0 mL/min,  $\lambda = 224$  nm)

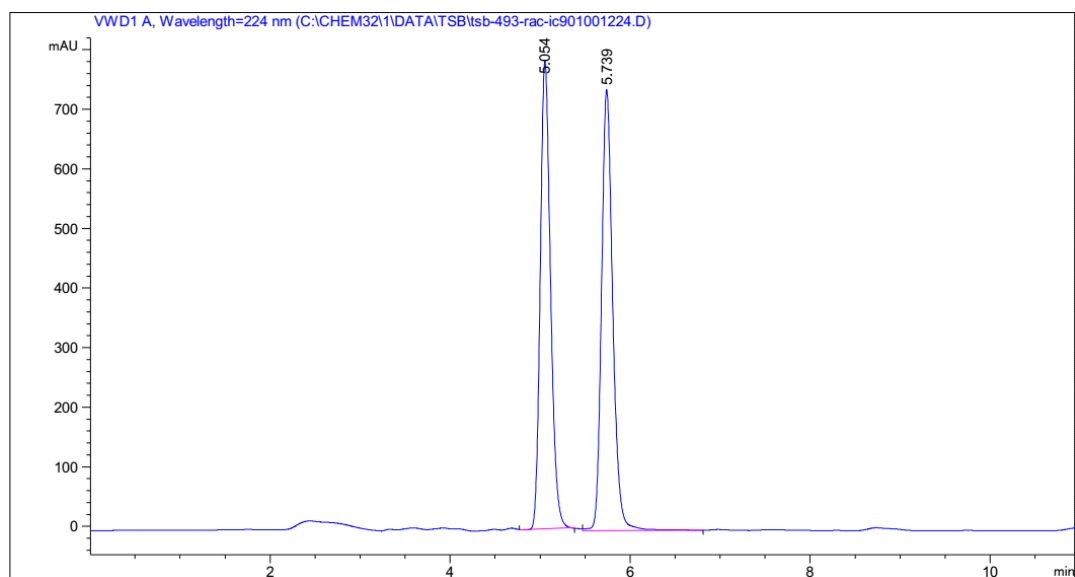

| Peak Name | RT [min] | Type | width [min] | Area [mAU*s] | Height [mAu] | Area ratio % |
|-----------|----------|------|-------------|--------------|--------------|--------------|
| 1         | 5.054    | MM   | 0.1317      | 6202.67139   | 785.11359    | 49.1314      |
| 2         | 5.739    | VB   | 0.1322      | 6421.99072   | 740.40649    | 50.8686      |

**Enantioenriched sample 3ae:**

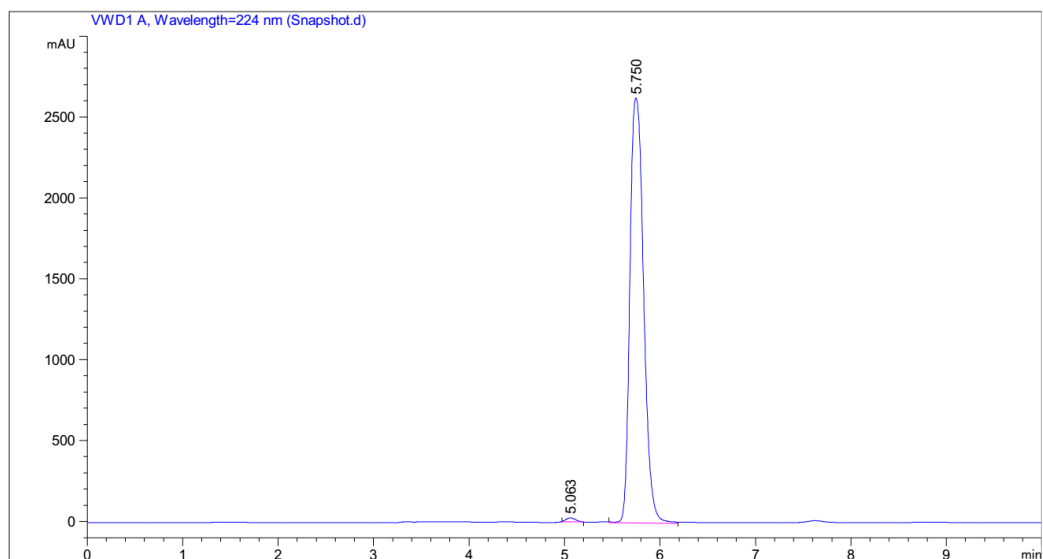

| Peak Name | RT [min] | Type | width [min] | Area [mAU*s] | Height [mAu] | Area ratio % |
|-----------|----------|------|-------------|--------------|--------------|--------------|
| 1         | 5.063    | MM   | 0.1181      | 175.21301    | 24.72530     | 0.6632       |
| 2         | 5.750    | MM   | 0.1664      | 2.62442e4    | 2628.57544   | 99.3368      |

**Racemic sample 3af:** HPLC (Daicel Chiralpak AD-H column (hexane/iPrOH = 99:1, flow rate: 1.0 mL/min,  $\lambda = 234$  nm)

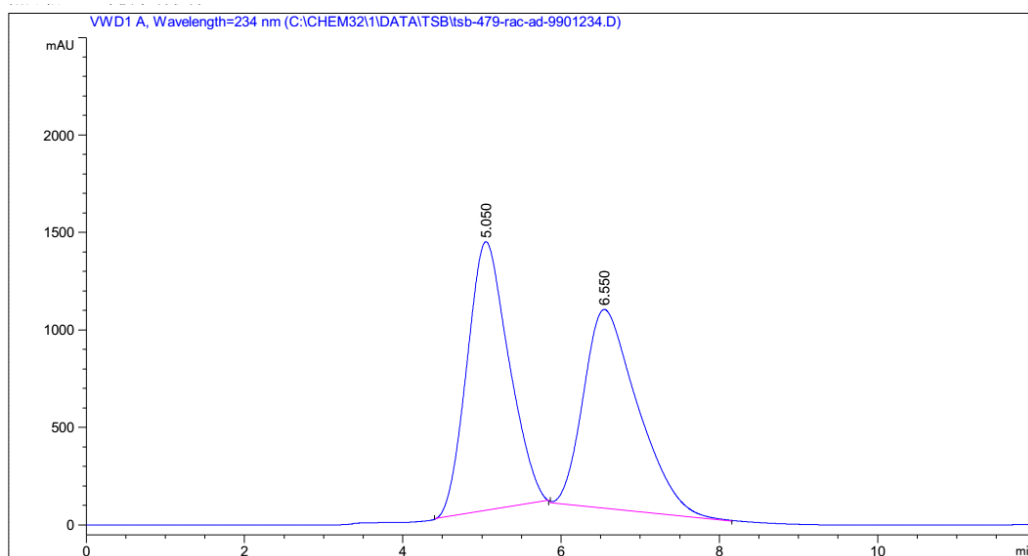

| Peak Name | RT [min] | Type | width [min] | Area [mAU*s] | Height [mAu] | Area ratio % |
|-----------|----------|------|-------------|--------------|--------------|--------------|
| 1         | 5.050    | MM   | 0.6093      | 5.03443e4    | 1377.06030   | 50.9537      |
| 2         | 6.550    | MM   | 0.7931      | 4.84597e4    | 1018.35785   | 49.0463      |

**Enantioenriched sample 3af:**

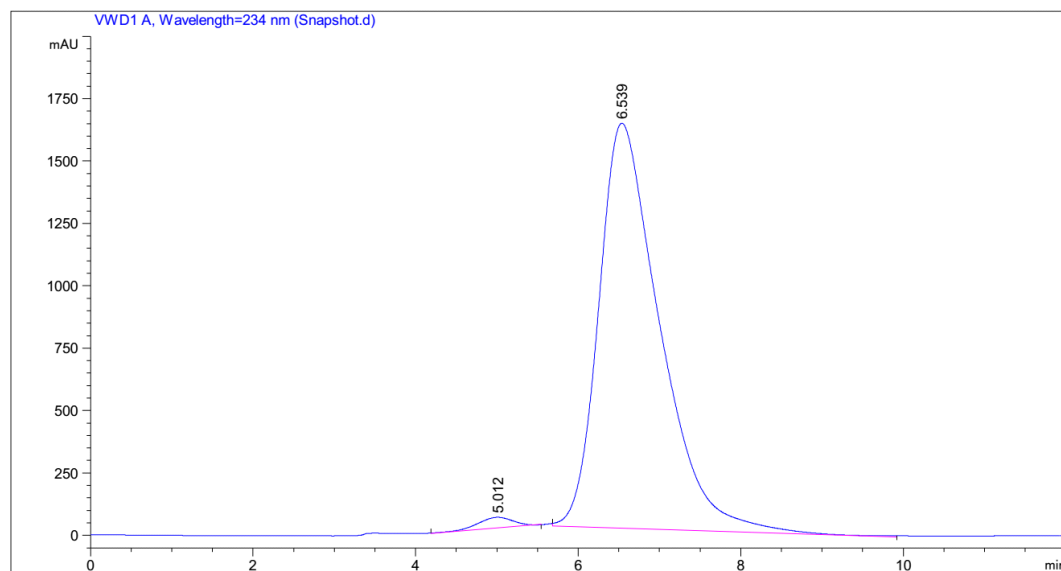

| Peak Name | RT [min] | Type | width [min] | Area [mAU*s] | Height [mAu] | Area ratio % |
|-----------|----------|------|-------------|--------------|--------------|--------------|
| 1         | 5.012    | MM   | 0.4958      | 1265.40015   | 42.53933     | 1.4733       |
| 2         | 6.539    | MM   | 0.8687      | 8.46250e4    | 1623.57764   | 98.5267      |

**Racemic sample 3ag:** HPLC (Daicel Chiralpak AD-H column (hexane/iPrOH = 99:1, flow rate: 1.0 mL/min,  $\lambda = 224$  nm)

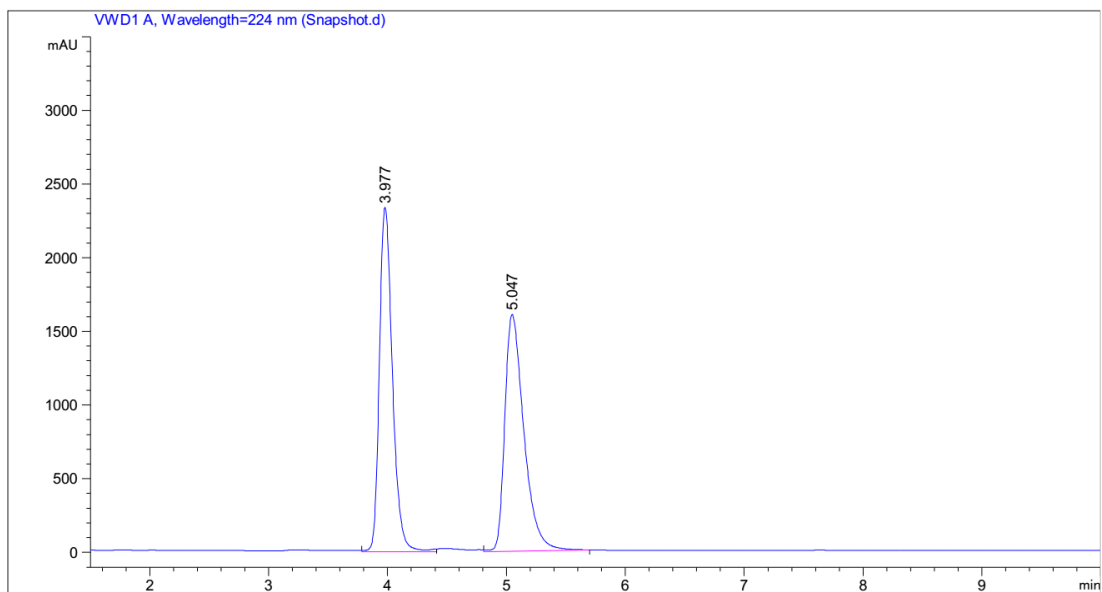

| Peak Name | RT [min] | Type | width [min] | Area [mAU*s] | Height [mAu] | Area ratio % |
|-----------|----------|------|-------------|--------------|--------------|--------------|
| 1         | 3.977    | MM   | 0.1270      | 1.78005e4    | 2336.25439   | 49.7994      |
| 2         | 5.047    | MM   | 0.1861      | 1.79440e4    | 1606.99146   | 50.2006      |

**Enantioenriched sample 3ag:**

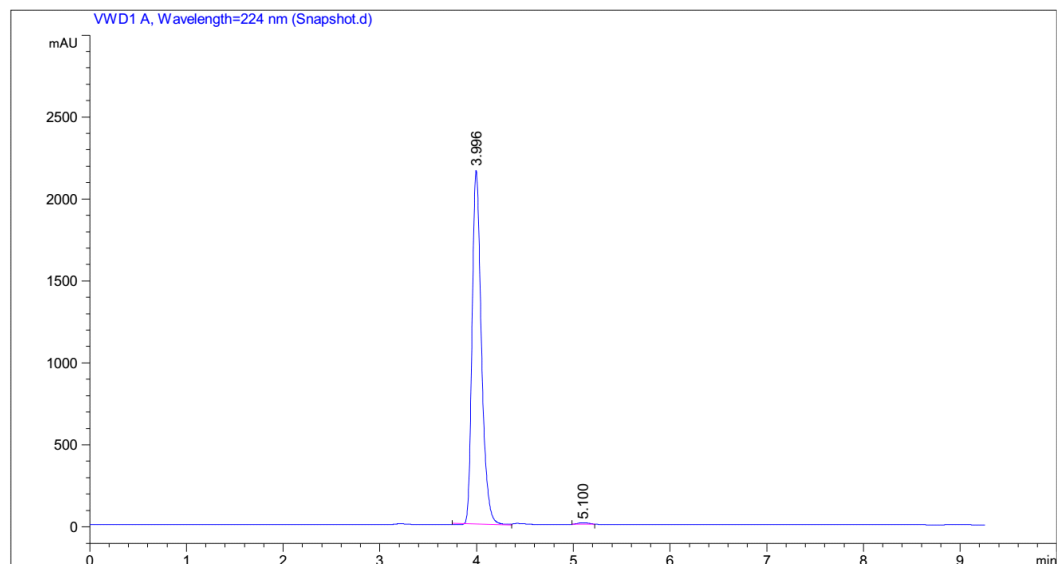

| Peak Name | RT [min] | Type | width [min] | Area [mAU*s] | Height [mAu] | Area ratio % |
|-----------|----------|------|-------------|--------------|--------------|--------------|
| 1         | 3.996    | MM   | 0.1116      | 1.44544e4    | 2158.07788   | 99.5263      |
| 2         | 5.100    | MM   | 0.1220      | 68.79845     | 9.39519      | 0.4737       |

**Racemic sample 3ah:** HPLC (Daicel Chiralpak OJ column (hexane/iPrOH = 98:2, flow rate: 1.0 mL/min,  $\lambda = 254$  nm)

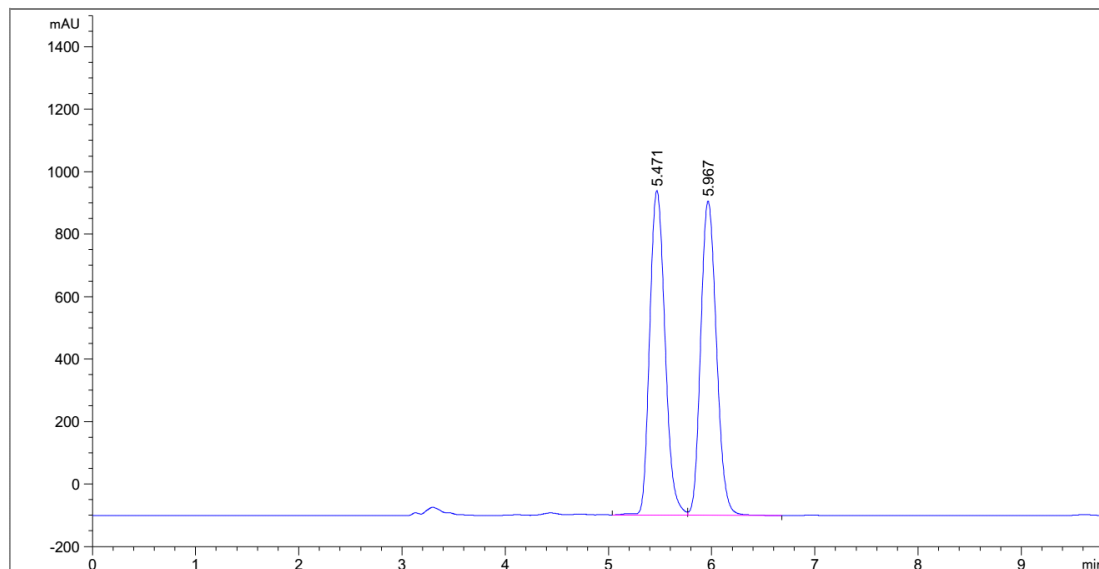

| Peak Name | RT [min] | Type | width [min] | Area [mAU*s] | Height [mAu] | Area ratio % |
|-----------|----------|------|-------------|--------------|--------------|--------------|
| 1         | 5.471    | VV R | 0.1618      | 1.07038e4    | 1038.93140   | 50.0642      |
| 2         | 5.967    | VB   | 0.1678      | 1.06763e4    | 1006.32996   | 49.9358      |

**Enantioenriched sample 3ah:**

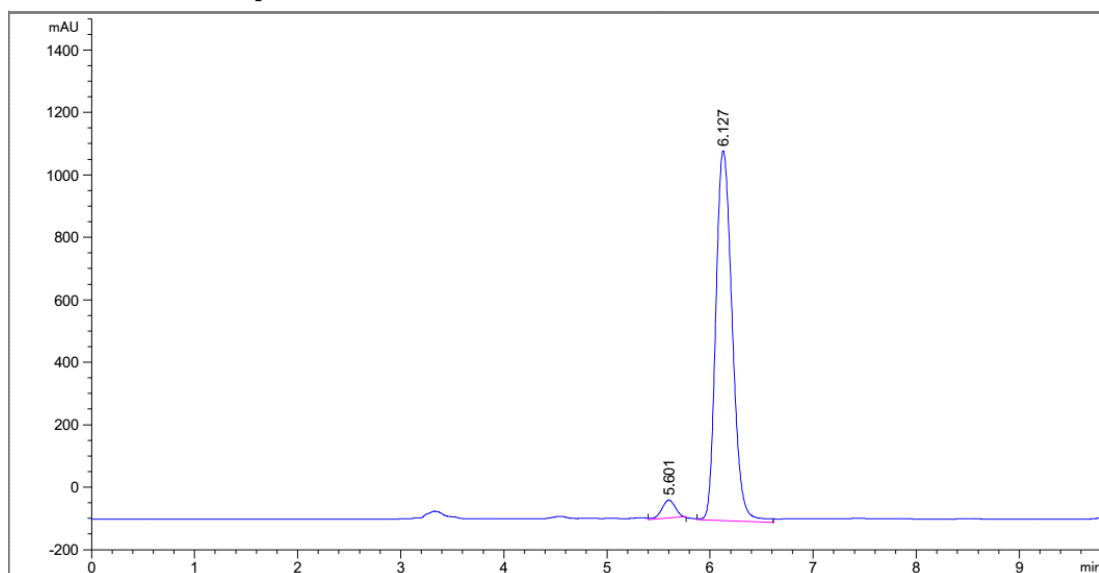

| Peak Name | RT [min] | Type | width [min] | Area [mAU*s] | Height [mAu] | Area ratio % |
|-----------|----------|------|-------------|--------------|--------------|--------------|
| 1         | 5.601    | MM   | 0.1511      | 518.56927    | 57.20169     | 3.8238       |
| 2         | 6.127    | MM   | 0.1835      | 1.30430e4    | 1184.41650   | 96.1762      |

**Racemic sample 3ai:** HPLC (Daicel Chiralpak OJ-H column (hexane/iPrOH = 99:1, flow rate: 0.6 mL/min,  $\lambda = 225$  nm)

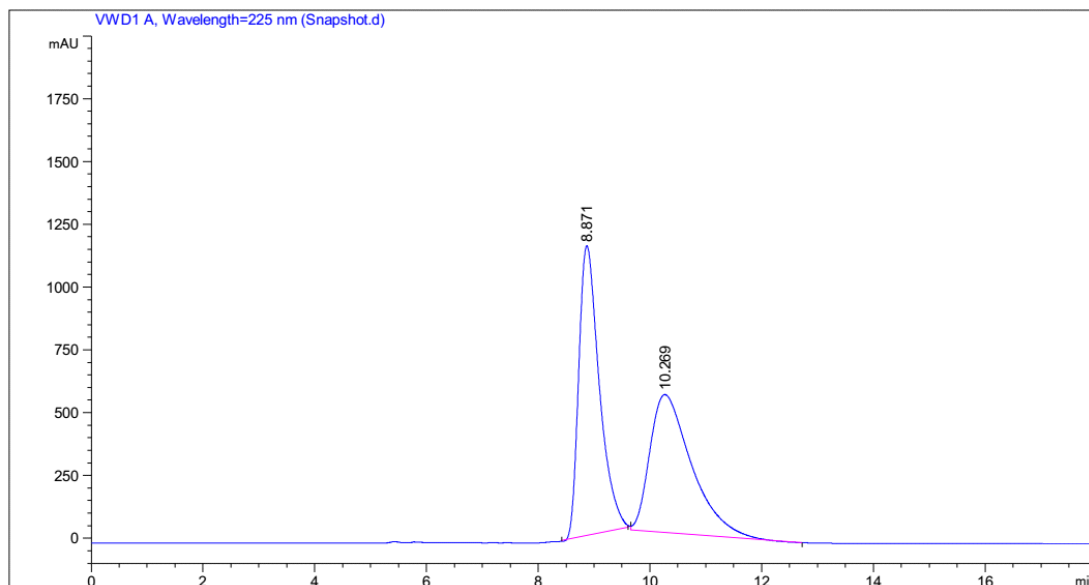

| Peak Name | RT [min] | Type | width [min] | Area [mAU*s] | Height [mAu] | Area ratio % |
|-----------|----------|------|-------------|--------------|--------------|--------------|
| 1         | 8.871    | MM   | 0.4249      | 2.94068e4    | 1153.56030   | 50.7388      |
| 2         | 10.269   | MM   | 0.8666      | 2.85504e4    | 549.06744    | 49.2612      |

**Enantioenriched sample 3ai:**

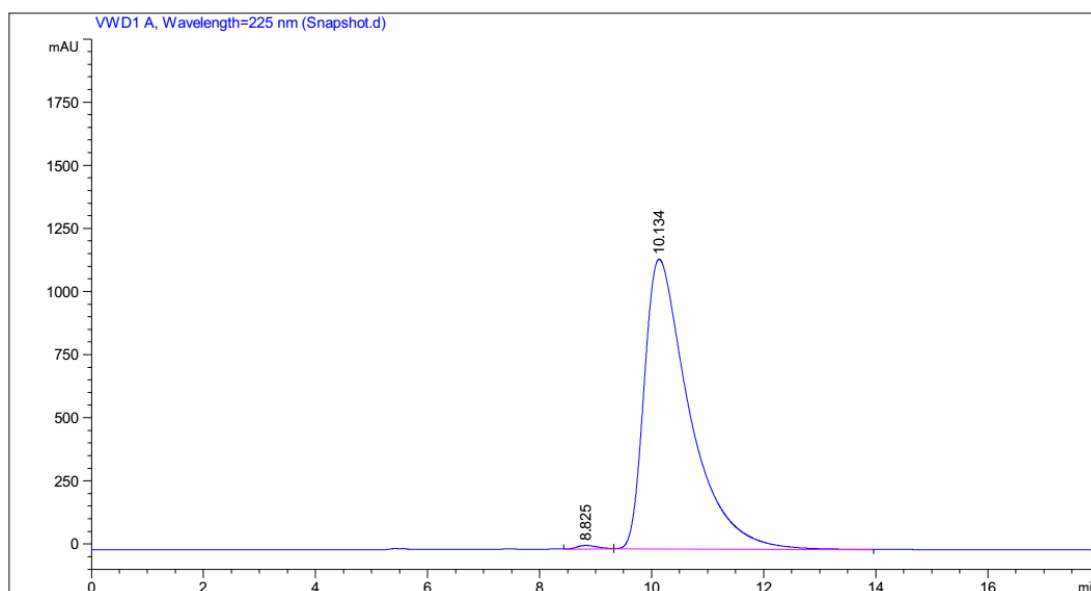

| Peak Name | RT [min] | Type | width [min] | Area [mAU*s] | Height [mAu] | Area ratio % |
|-----------|----------|------|-------------|--------------|--------------|--------------|
| 1         | 8.825    | MM   | 0.4544      | 423.24597    | 15.52276     | 0.6531       |
| 2         | 10.134   | MM   | 0.9342      | 6.43796e4    | 1148.54407   | 99.3469      |



**Racemic sample 3aj:** HPLC (Daicel Chiralpak IE column (hexane/iPrOH = 90:10, flow rate: 1.0 mL/min,  $\lambda = 234$  nm)

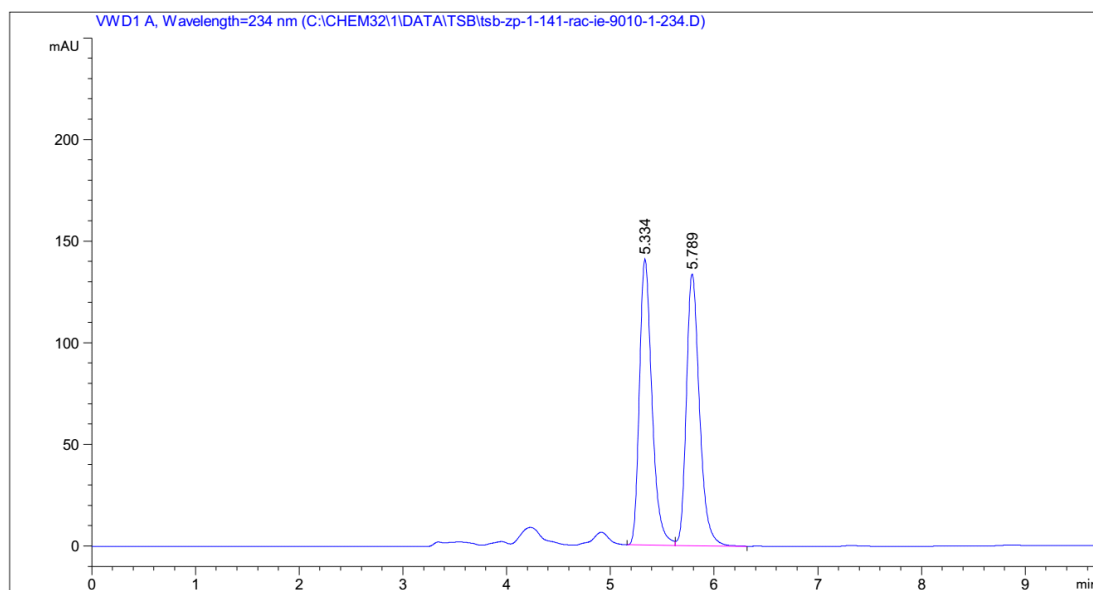

| Peak Name | RT [min] | Type | width [min] | Area [mAU*s] | Height [mAu] | Area ratio % |
|-----------|----------|------|-------------|--------------|--------------|--------------|
| 1         | 5.334    | BV   | 0.1289      | 1180.73389   | 140.64307    | 50.1562      |
| 2         | 5.789    | VB   | 0.1343      | 1173.38123   | 133.78452    | 49.8438      |

**Enantioenriched sample 3aj:**

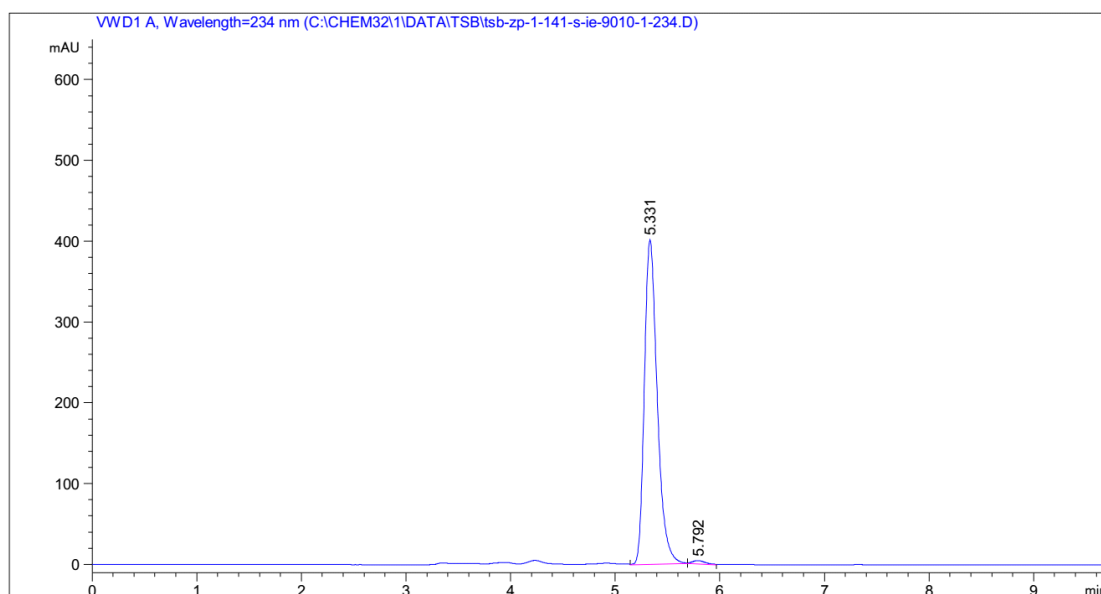

| Peak Name | RT [min] | Type | width [min] | Area [mAU*s] | Height [mAu] | Area ratio % |
|-----------|----------|------|-------------|--------------|--------------|--------------|
| 1         | 5.331    | MM   | 0.1423      | 3427.90723   | 401.62619    | 98.9801      |
| 2         | 5.792    | MM   | 0.1440      | 35.32218     | 4.08705      | 1.0199       |

**Racemic sample 3ak:** HPLC (Daicel Chiralpak ID column (hexane/iPrOH = 99:1, flow rate: 0.8 mL/min,  $\lambda = 224$  nm)

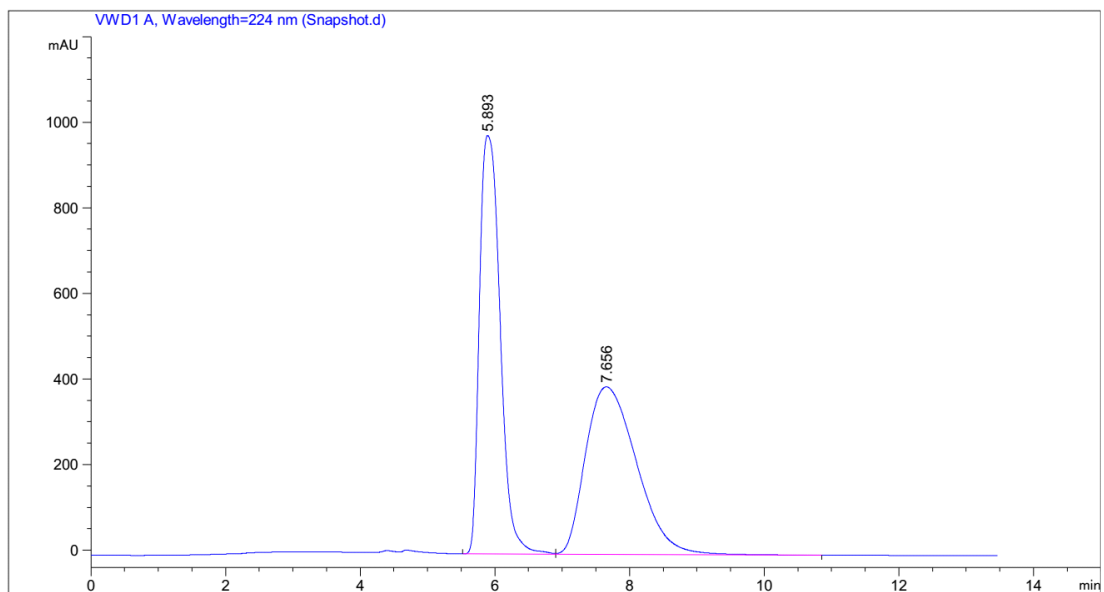

| Peak Name | RT [min] | Type | width [min] | Area [mAU*s] | Height [mAu] | Area ratio % |
|-----------|----------|------|-------------|--------------|--------------|--------------|
| 1         | 5.893    | BV   | 0.3386      | 2.08470e4    | 978.18805    | 50.2211      |
| 2         | 7.656    | VB   | 0.8474      | 2.06634e4    | 391.74585    | 49.7789      |

**Enantioenriched sample 3ak:**

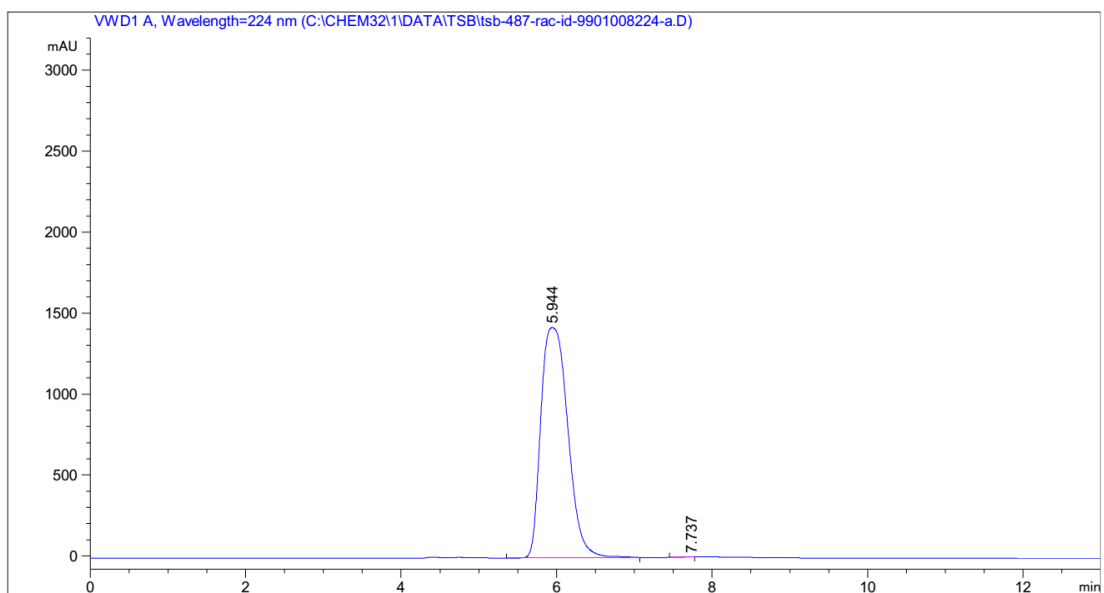

| Peak Name | RT [min] | Type | width [min] | Area [mAU*s] | Height [mAu] | Area ratio % |
|-----------|----------|------|-------------|--------------|--------------|--------------|
| 1         | 5.944    | MM   | 0.4016      | 3.42694e4    | 1422.09314   | 99.9893      |
| 2         | 7.737    | MM   | 0.1402      | 3.65587      | 4.34561e-1   | 0.0107       |

**Racemic sample 3a1:** HPLC (Daicel Chiralpak ID column (hexane/iPrOH = 99:1, flow rate: 1.0 mL/min,  $\lambda=224$  nm)

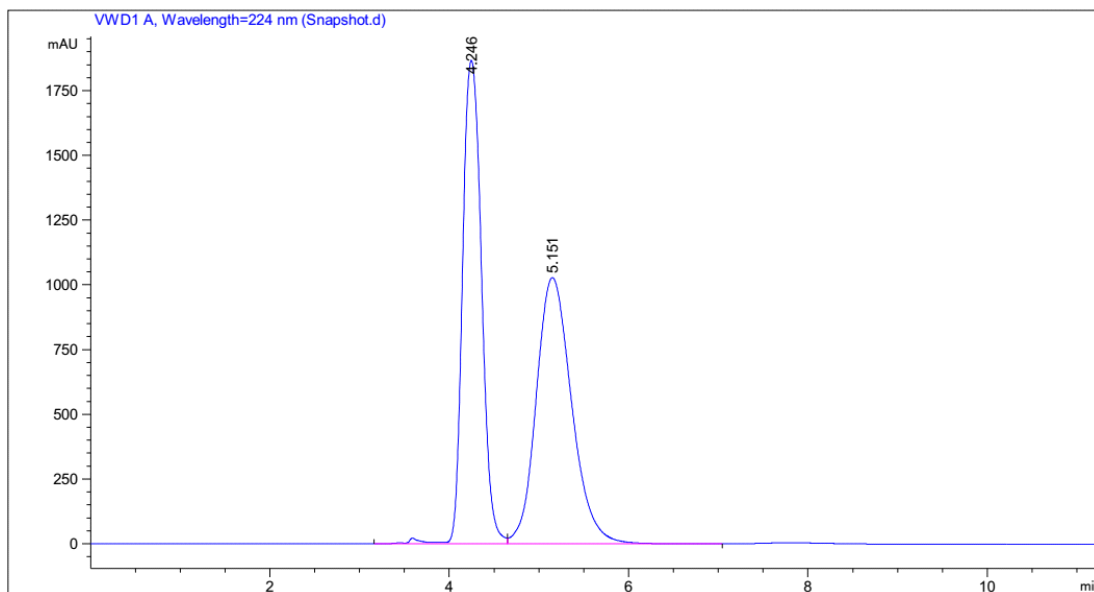

| Peak Name | RT [min] | Type | width [min] | Area [mAU*s] | Height [mAu] | Area ratio % |
|-----------|----------|------|-------------|--------------|--------------|--------------|
| 1         | 4.246    | VV R | 0.2340      | 2.74709e4    | 1866.99036   | 49.3064      |
| 2         | 5.151    | VB   | 0.4284      | 2.82438e4    | 1028.41479   | 50.6936      |

**Enantioenriched sample 3a1:**

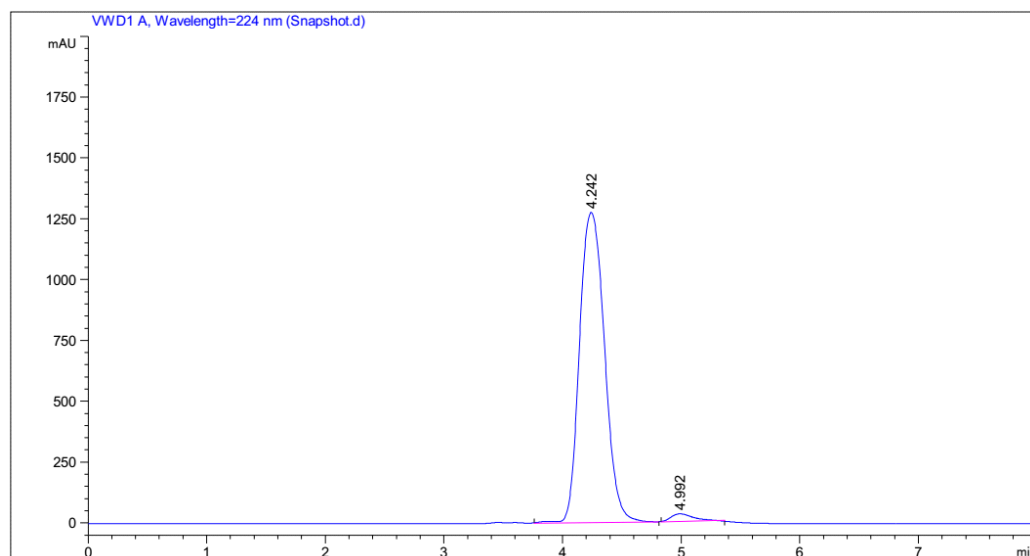

| Peak Name | RT [min] | Type | width [min] | Area [mAU*s] | Height [mAu] | Area ratio % |
|-----------|----------|------|-------------|--------------|--------------|--------------|
| 1         | 4.242    | MM   | 0.2440      | 1.86533e4    | 1274.01868   | 97.9006      |
| 2         | 4.992    | MM   | 0.2153      | 400.01483    | 30.96504     | 2.0994       |

**Racemic sample 3am:** HPLC (Daicel Chiralpak ID column (hexane/iPrOH = 99:1, flow rate: 1.0 mL/min,  $\lambda = 224$  nm)

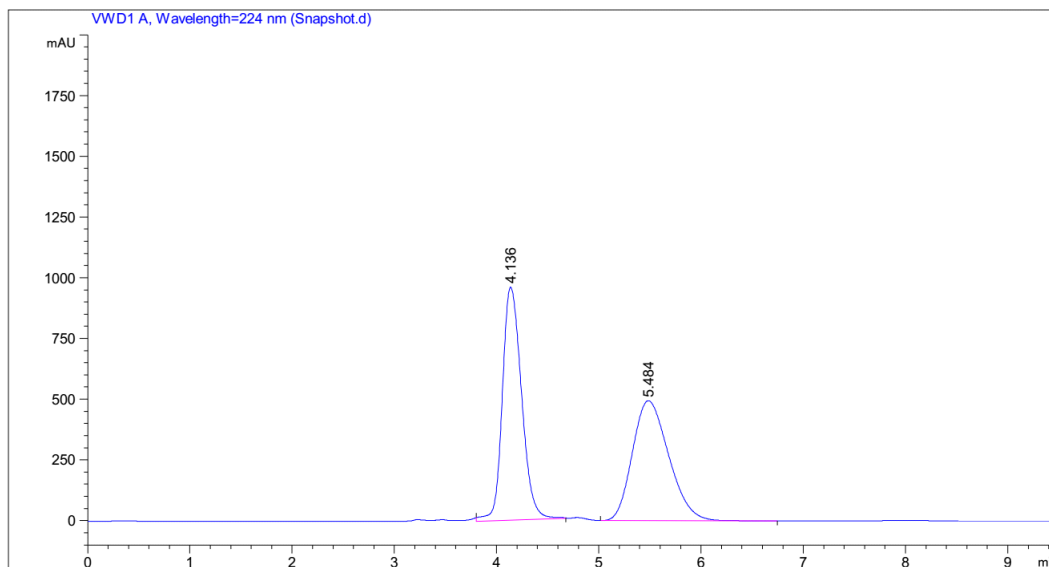

| Peak Name | RT [min] | Type | width [min] | Area [mAU*s] | Height [mAu] | Area ratio % |
|-----------|----------|------|-------------|--------------|--------------|--------------|
| 1         | 4.136    | MM   | 0.2173      | 1.25038e4    | 959.01917    | 50.6343      |
| 2         | 5.484    | BB   | 0.3850      | 1.21906e4    | 493.87051    | 49.3657      |

**Enantioenriched sample 3am:**

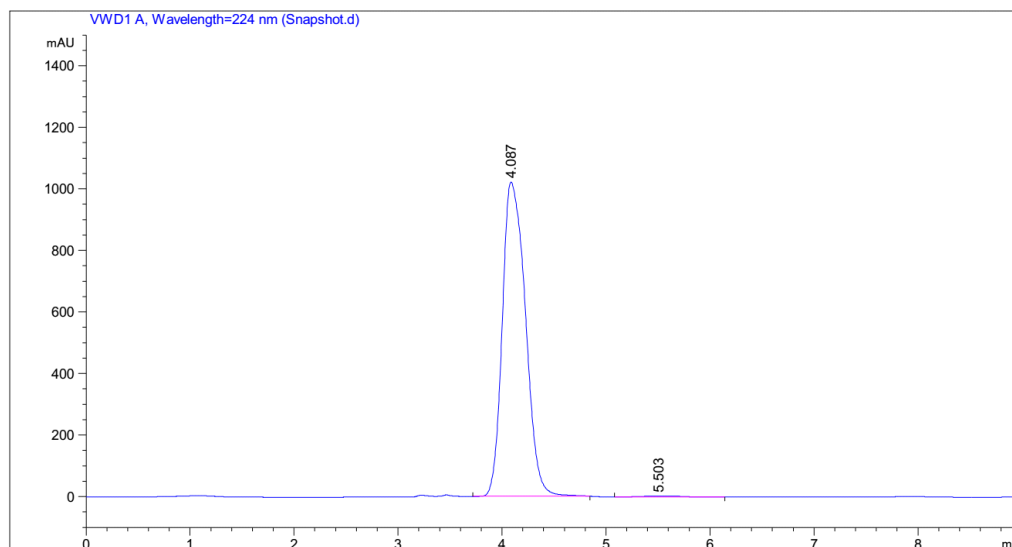

| Peak Name | RT [min] | Type | width [min] | Area [mAU*s] | Height [mAu] | Area ratio % |
|-----------|----------|------|-------------|--------------|--------------|--------------|
| 1         | 4.087    | MM   | 0.2574      | 1.57722e4    | 1021.36707   | 99.4488      |
| 2         | 5.503    | BB   | 0.4091      | 87.41776     | 3.01687      | 0.5512       |

**Racemic sample 3an:** HPLC (Daicel Chiralpak IC column (hexane/iPrOH = 90:10, flow rate: 1.0 mL/min,  $\lambda = 225$  nm)

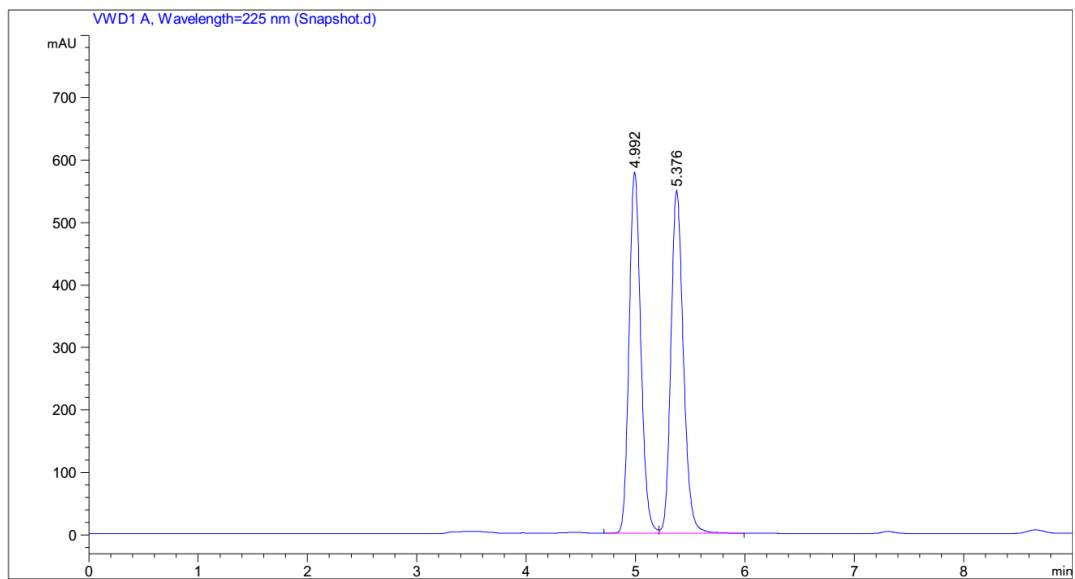

| Peak Name | RT [min] | Type | width [min] | Area [mAU*s] | Height [mAu] | Area ratio % |
|-----------|----------|------|-------------|--------------|--------------|--------------|
| 1         | 4.992    | BV   | 0.1146      | 4295.67236   | 578.68378    | 49.6933      |
| 2         | 5.376    | VB   | 0.1214      | 4348.70361   | 548.85614    | 50.3067      |

**Enantioenriched sample 3an:**

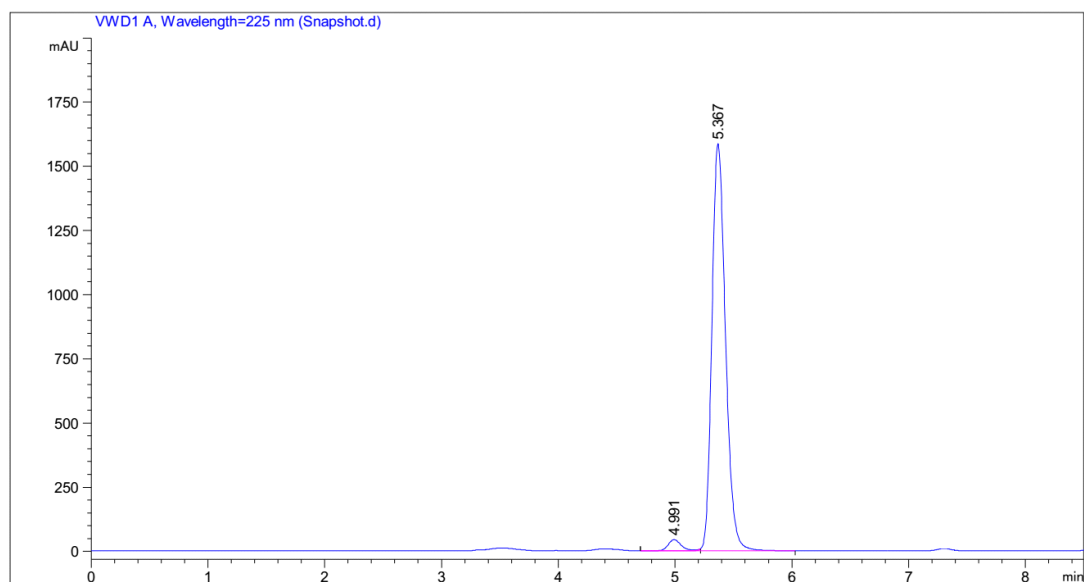

| Peak Name | RT [min] | Type | width [min] | Area [mAU*s] | Height [mAu] | Area ratio % |
|-----------|----------|------|-------------|--------------|--------------|--------------|
| 1         | 4.991    | BV E | 0.1193      | 338.81140    | 43.30105     | 2.5733       |
| 2         | 5.367    | VB R | 0.1264      | 1.28274e4    | 1585.02124   | 97.4267      |

**Racemic sample 3ar:** HPLC (Daicel Chiralpak ID column (hexane/iPrOH = 90:10, flow rate: 1.0 mL/min,  $\lambda = 254$  nm)

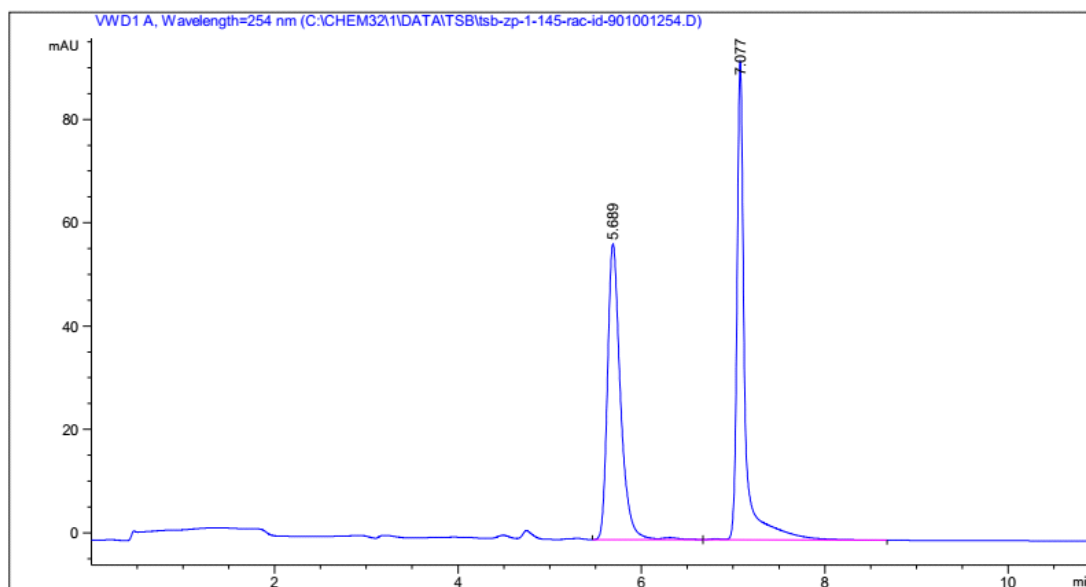

| Peak Name | RT [min] | Type | width [min] | Area [mAU*s] | Height [mAu] | Area ratio % |
|-----------|----------|------|-------------|--------------|--------------|--------------|
| 1         | 5.689    | BV R | 0.1475      | 561.51886    | 57.22531     | 50.1884      |
| 2         | 7.077    | VB R | 0.0893      | 557.30286    | 92.48210     | 49.8116      |

**Enantioenriched sample 3ar**

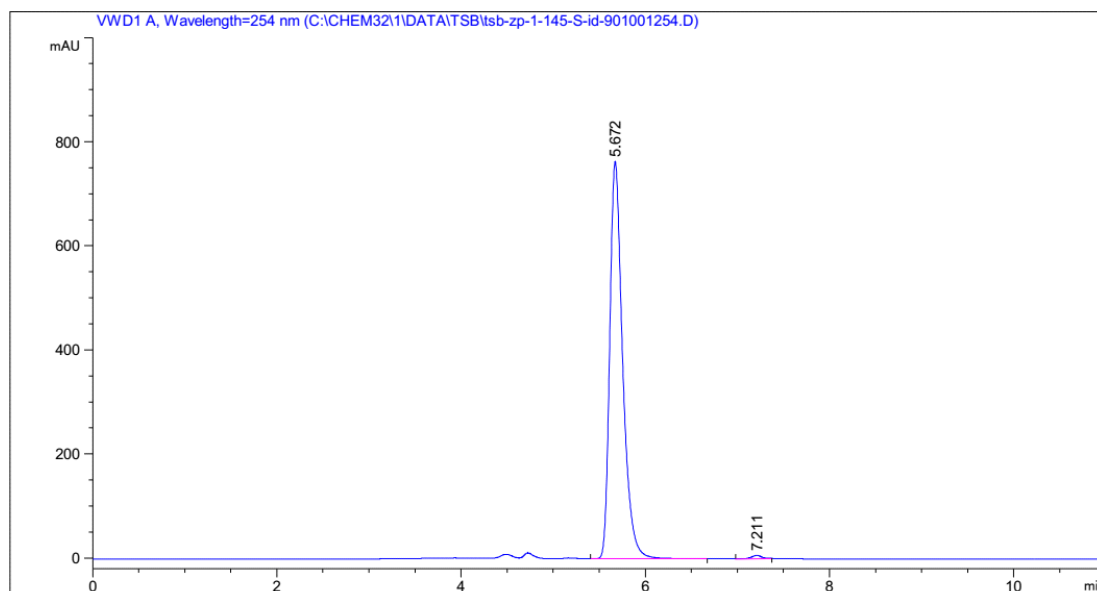

| Peak Name | RT [min] | Type | width [min] | Area [mAU*s] | Height [mAu] | Area ratio % |
|-----------|----------|------|-------------|--------------|--------------|--------------|
| 1         | 5.672    | BB   | 0.1460      | 7394.72070   | 763.27765    | 99.3220      |
| 2         | 7.211    | MM   | 0.1282      | 50.48053     | 6.56200      | 0.6780       |

**Racemic sample 3as:** HPLC (Daicel Chiralpak OD-H column (hexane/iPrOH = 90:10, flow rate: 1.0 mL/min,  $\lambda = 254$  nm)

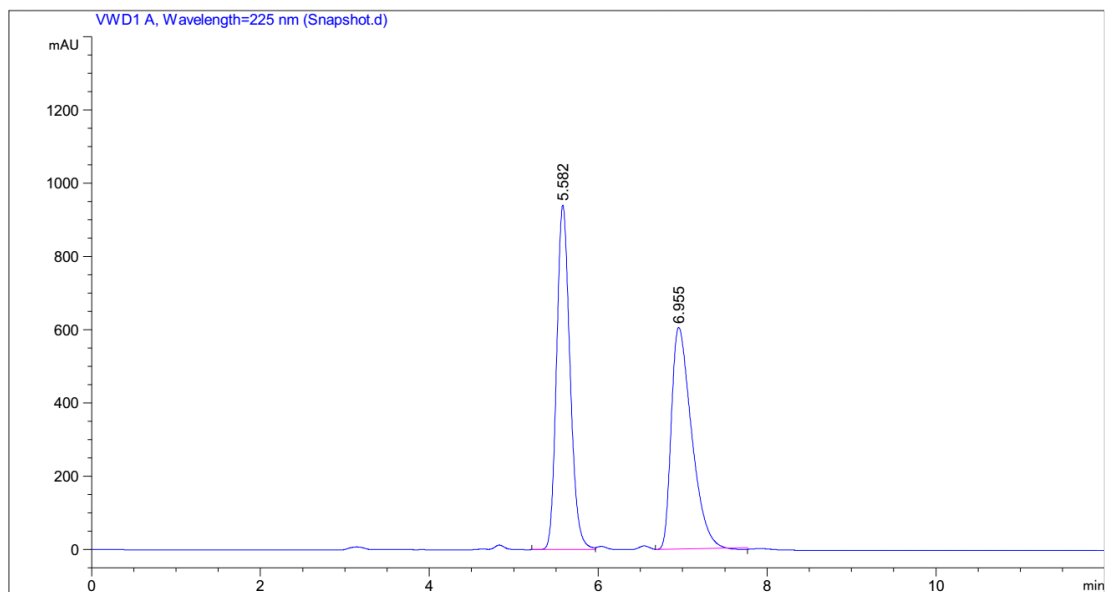

| Peak Name | RT [min] | Type | width [min] | Area [mAU*s] | Height [mAu] | Area ratio % |
|-----------|----------|------|-------------|--------------|--------------|--------------|
| 1         | 5.582    | MM   | 0.1838      | 1.03719e4    | 940.61340    | 50.6554      |
| 2         | 6.955    | MM   | 0.2782      | 1.01035e4    | 605.36255    | 49.3446      |

**Enantioenriched sample 3as**

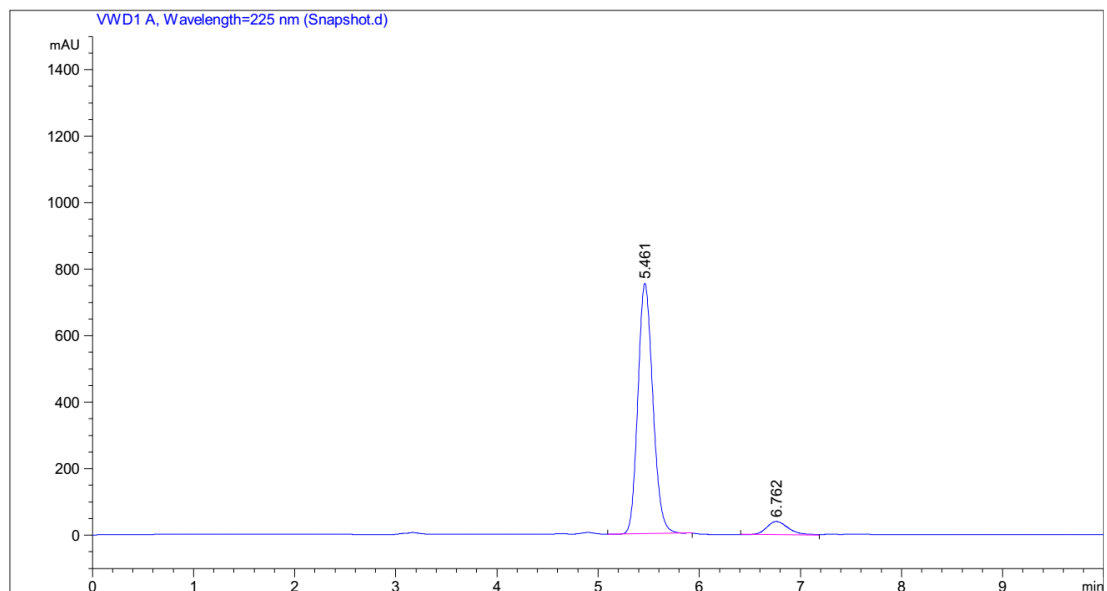

| Peak Name | RT [min] | Type | width [min] | Area [mAU*s] | Height [mAu] | Area ratio % |
|-----------|----------|------|-------------|--------------|--------------|--------------|
| 1         | 5.461    | MM   | 0.1711      | 7730.61133   | 752.93494    | 93.0446      |
| 2         | 6.762    | MM   | 0.2444      | 577.89392    | 39.40478     | 6.9554       |

**Racemic sample 3ba:** HPLC (Daicel Chiralpak OD-H column (hexane/iPrOH = 98:2, flow rate: 1.0 mL/min,  $\lambda = 224$  nm)

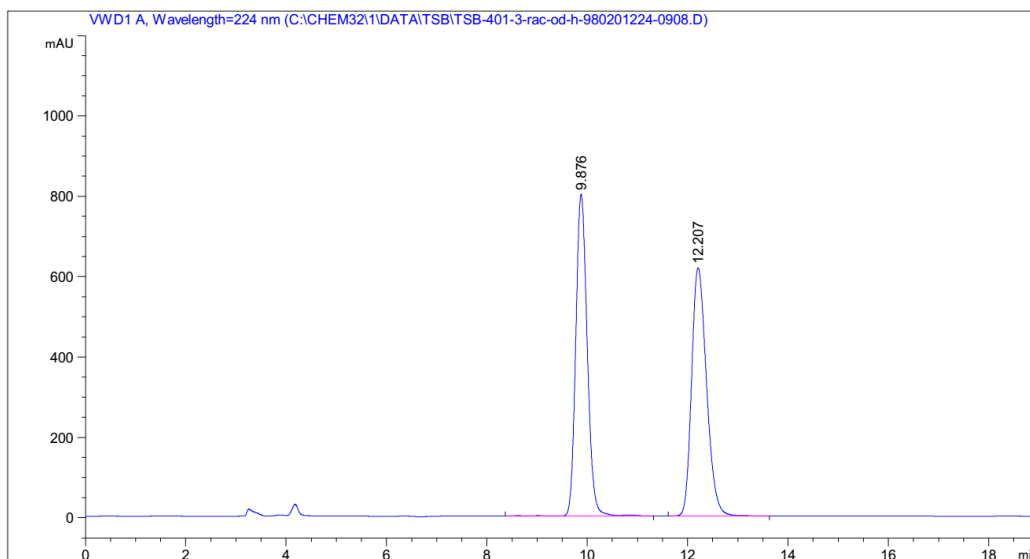

| Peak Name | RT [min] | Type | width [min] | Area [mAU*s] | Height [mAu] | Area ratio % |
|-----------|----------|------|-------------|--------------|--------------|--------------|
| 1         | 9.876    | VV R | 0.2468      | 1.27329e4    | 800.64240    | 49.9718      |
| 2         | 12.207   | BB   | 0.3197      | 1.27472e4    | 617.86584    | 50.0282      |

**Enantioenriched sample 3ba**

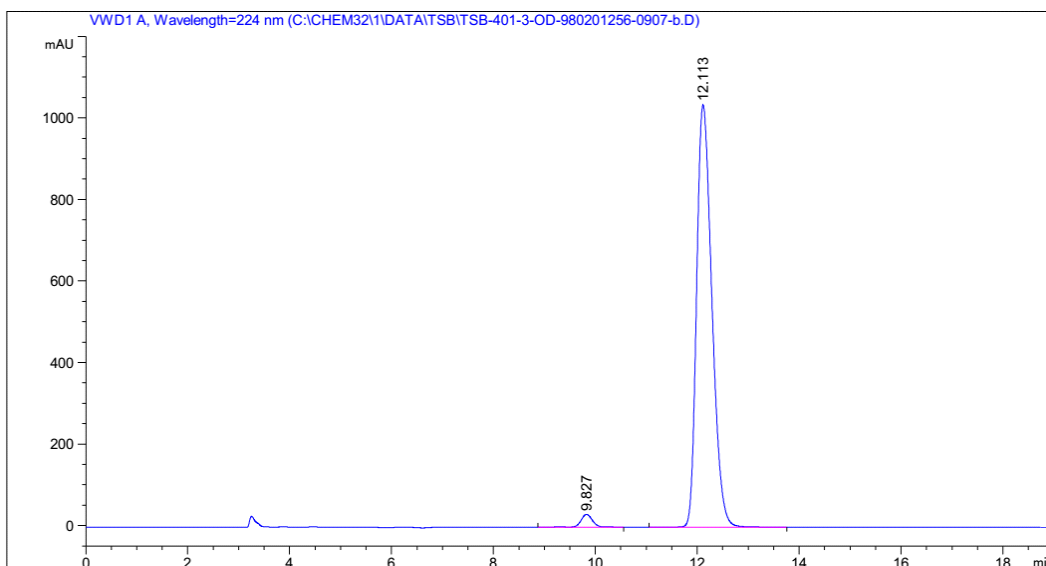

| Peak Name | RT [min] | Type | width [min] | Area [mAU*s] | Height [mAu] | Area ratio % |
|-----------|----------|------|-------------|--------------|--------------|--------------|
| 1         | 9.827    | VB R | 0.2419      | 491.14609    | 31.32950     | 2.2336       |
| 2         | 12.113   | BB   | 0.3241      | 2.14981e4    | 1036.11121   | 97.7664      |



**Racemic sample 3ca:** HPLC (Daicel Chiralpak IC column (hexane/iPrOH = 98:2, flow rate: 1.0 mL/min,  $\lambda$ = 234 nm)

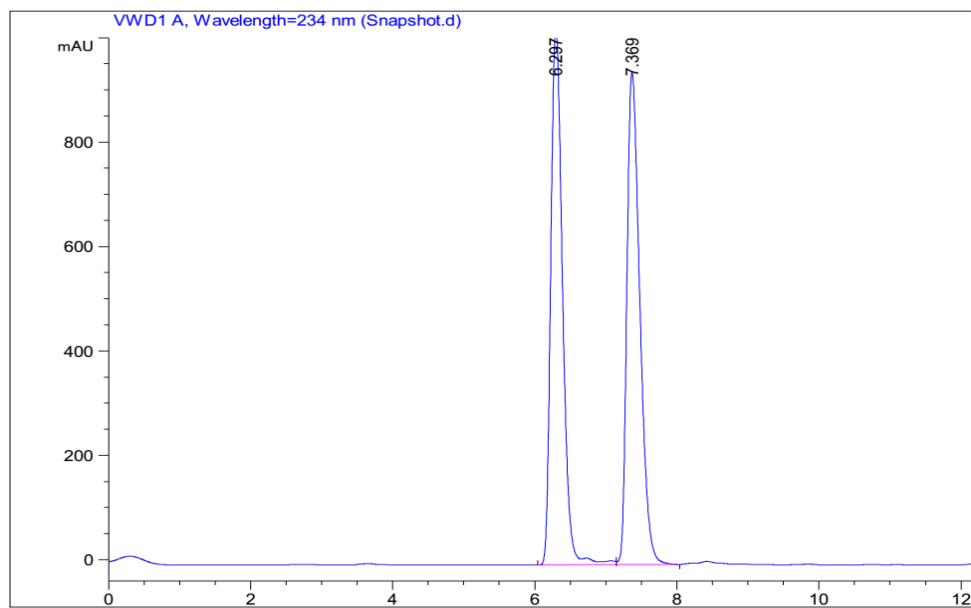

| Peak Name | RT [min] | Type | width [min] | Area [mAU*s] | Height [mAu] | Area ratio % |
|-----------|----------|------|-------------|--------------|--------------|--------------|
| 1         | 6.297    | BV R | 0.1760      | 1.18454e4    | 1033.76001   | 49.8816      |
| 2         | 7.369    | VB   | 0.1953      | 1.19017e4    | 942.43555    | 50.1184      |

**Enantioenriched sample 3ca**

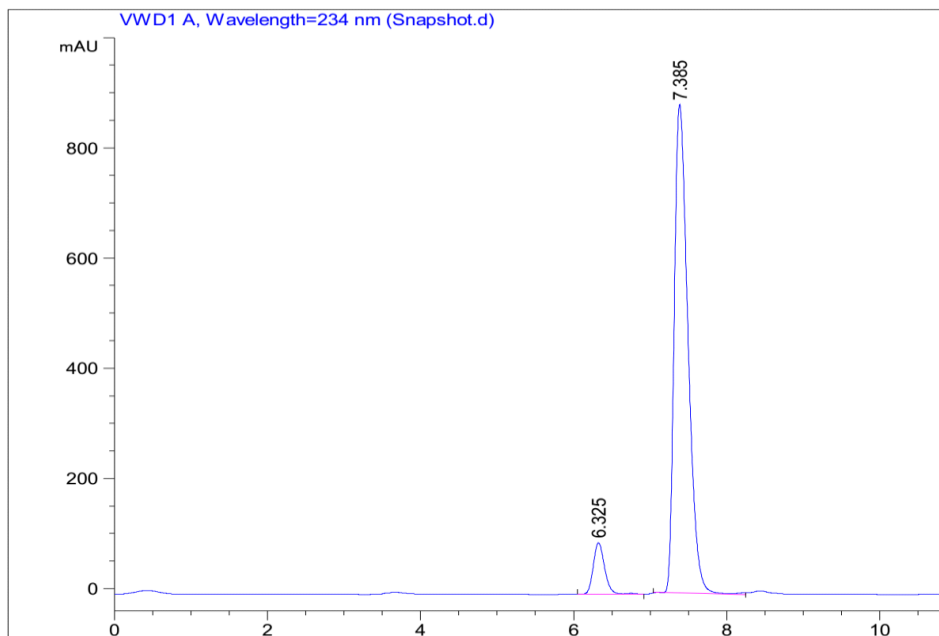

| Peak Name | RT [min] | Type | width [min] | Area [mAU*s] | Height [mAu] | Area ratio % |
|-----------|----------|------|-------------|--------------|--------------|--------------|
| 1         | 6.325    | BV R | 0.1593      | 963.19940    | 93.42186     | 8.0360       |
| 2         | 7.385    | MM   | 0.2073      | 1.10229e4    | 886.03912    | 91.9640      |

**Racemic sample 3da:** HPLC: Daicel Chiralpak IC column (hexane/iPrOH = 95:5, flow rate: 1.0 mL/min,  $\lambda = 225$  nm)

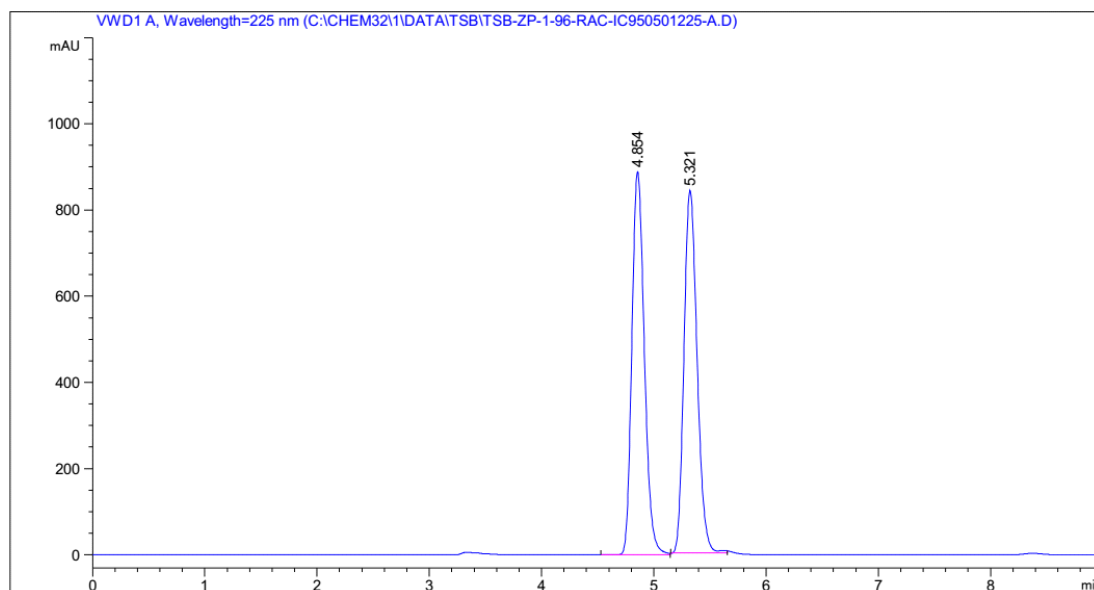

| Peak Name | RT [min] | Type | width [min] | Area [mAU*s] | Height [mAu] | Area ratio % |
|-----------|----------|------|-------------|--------------|--------------|--------------|
| 1         | 4.854    | BV   | 0.1210      | 6854.69629   | 888.57056    | 50.0634      |
| 2         | 5.321    | MM   | 0.1354      | 6837.32422   | 841.69513    | 49.9366      |

**Enantioenriched sample 3da**

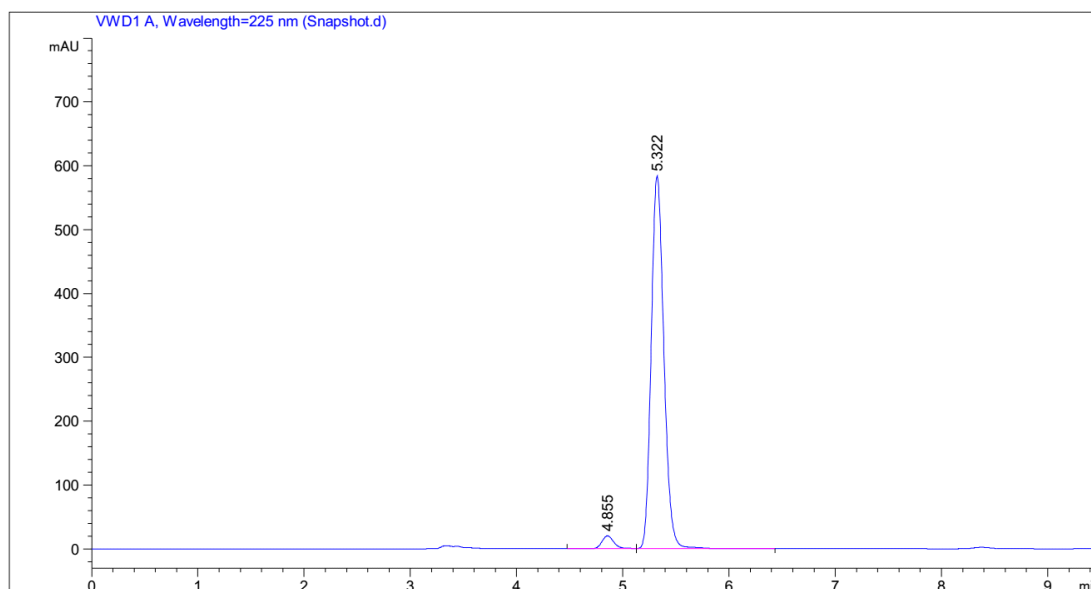

| Peak Name | RT [min] | Type | width [min] | Area [mAU*s] | Height [mAu] | Area ratio % |
|-----------|----------|------|-------------|--------------|--------------|--------------|
| 1         | 4.855    | BV   | 0.1226      | 159.18486    | 20.06286     | 3.1925       |
| 2         | 5.322    | VB   | 0.1285      | 4827.01416   | 583.80560    | 96.8075      |

**Racemic sample 3ea:** HPLC (Daicel Chiralpak IC column (hexane/iPrOH = 95:5, flow rate: 1.0 mL/min,  $\lambda = 225$  nm)

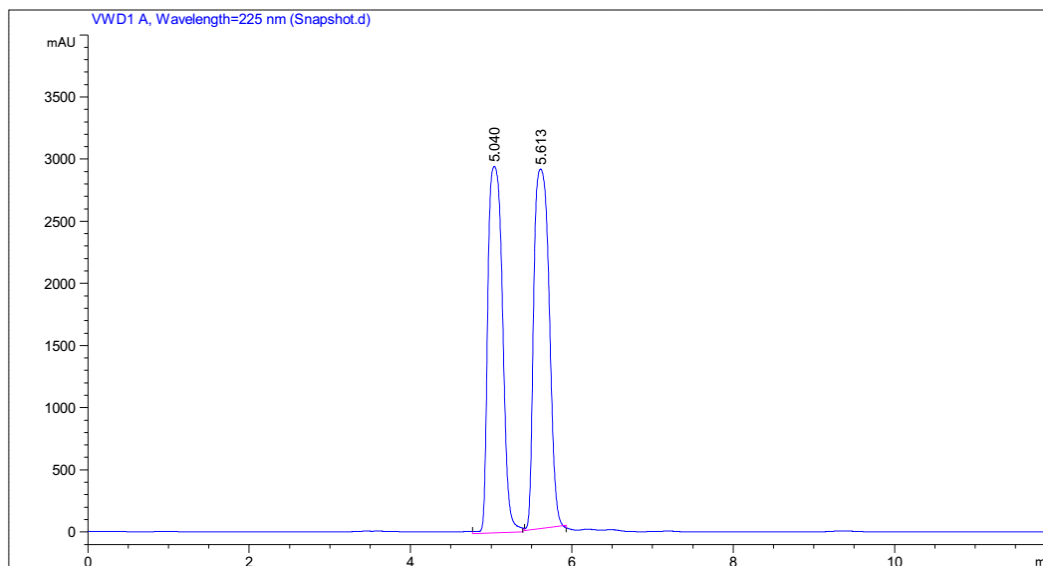

| Peak Name | RT [min] | Type | width [min] | Area [mAU*s] | Height [mAu] | Area ratio % |
|-----------|----------|------|-------------|--------------|--------------|--------------|
| 1         | 5.040    | MM   | 0.2099      | 3.71554e4    | 2950.33813   | 49.3615      |
| 2         | 5.613    | MM   | 0.2197      | 3.81166e4    | 2891.91699   | 50.6385      |

**Enantioenriched sample 3ea**

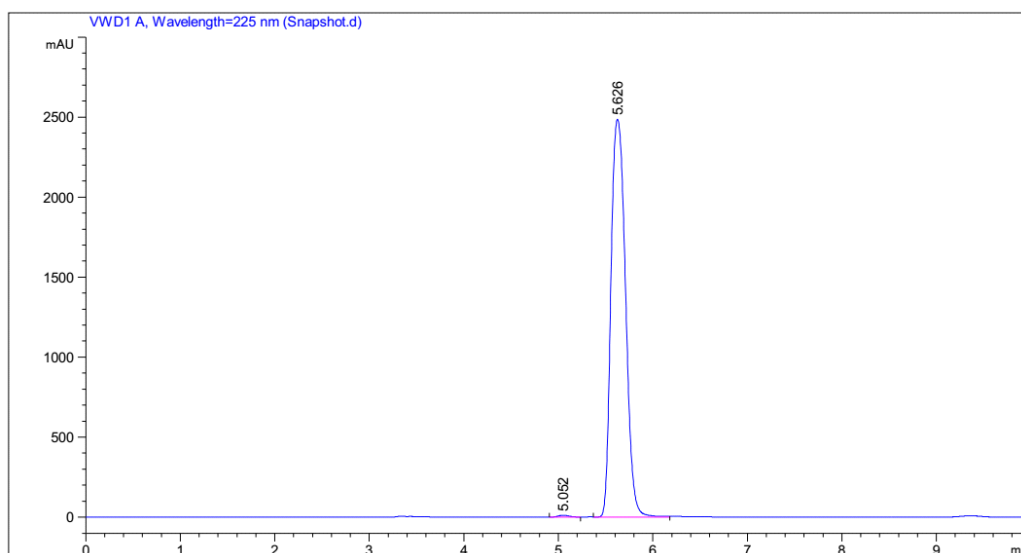

| Peak Name | RT [min] | Type | width [min] | Area [mAU*s] | Height [mAu] | Area ratio % |
|-----------|----------|------|-------------|--------------|--------------|--------------|
| 1         | 5.052    | BB   | 0.1186      | 88.17324     | 11.60594     | 0.3307       |
| 2         | 5.626    | MM   | 0.1782      | 2.65728e4    | 2484.87842   | 99.6693      |

**Racemic sample 3fa:** HPLC (Daicel Chiralpak OD-H column (hexane/iPrOH = 90:10, flow rate: 1.0 mL/min,  $\lambda = 224$  nm)

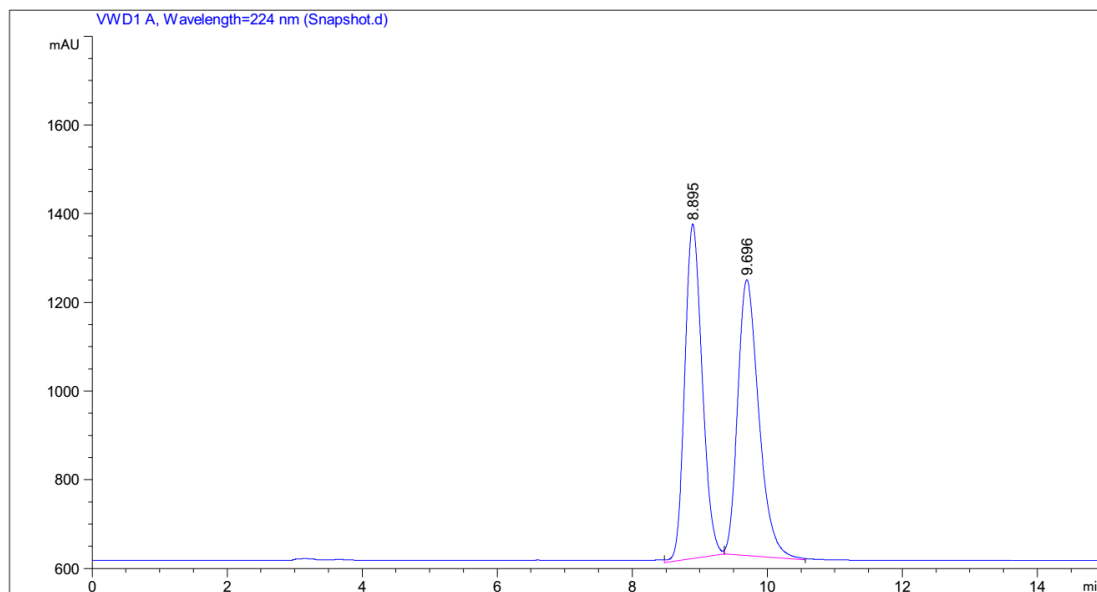

| Peak Name | RT [min] | Type | width [min] | Area [mAU*s] | Height [mAu] | Area ratio % |
|-----------|----------|------|-------------|--------------|--------------|--------------|
| 1         | 8.895    | MM   | 0.2979      | 1.34789e4    | 754.03918    | 49.9575      |
| 2         | 9.696    | MM   | 0.3617      | 1.35019e4    | 622.11243    | 50.0425      |

**Enantioenriched sample 3fa**

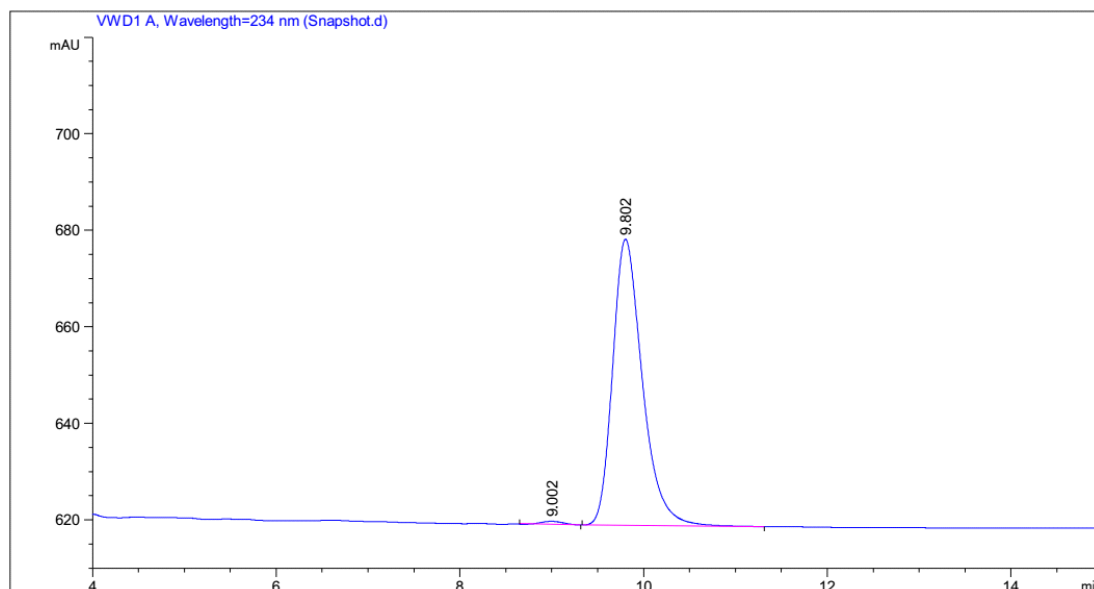

| Peak Name | RT [min] | Type | width [min] | Area [mAU*s] | Height [mAu] | Area ratio % |
|-----------|----------|------|-------------|--------------|--------------|--------------|
| 1         | 9.002    | MM   | 0.2655      | 10.05481     | 6.31110e-1   | 0.7479       |
| 2         | 9.802    | BB   | 0.3425      | 1334.33582   | 59.30146     | 99.2521      |

**Racemic sample 3ga:** HPLC (Daicel Chiralpak IC column (hexane/iPrOH = 98:2, flow rate: 1.0 mL/min,  $\lambda = 234$  nm)

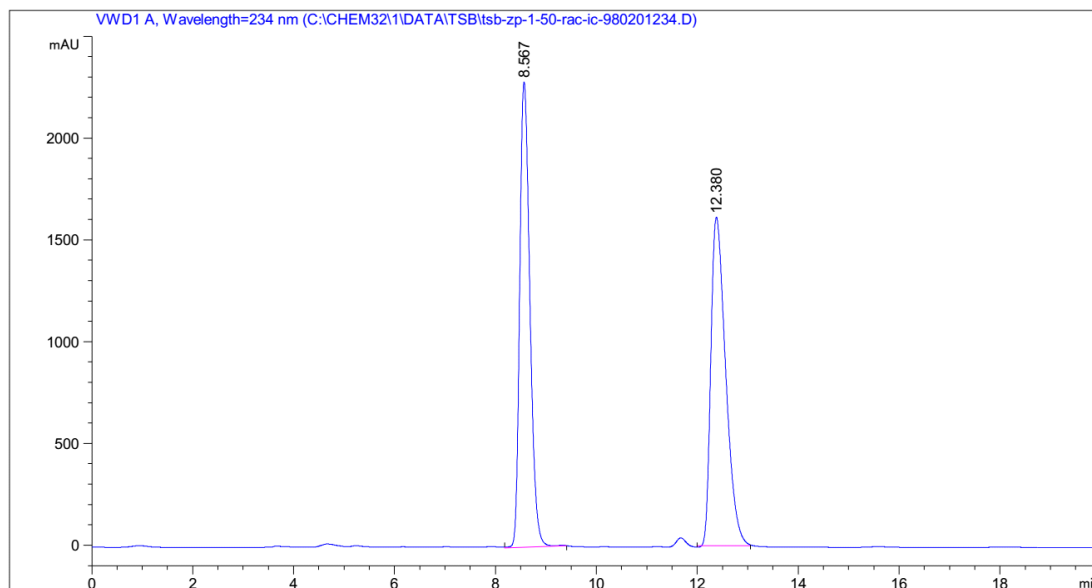

| Peak Name | RT [min] | Type | width [min] | Area [mAU*s] | Height [mAu] | Area ratio % |
|-----------|----------|------|-------------|--------------|--------------|--------------|
| 1         | 8.567    | MM   | 0.2330      | 3.19526e4    | 2285.52490   | 49.2605      |
| 2         | 12.380   | MM   | 0.3401      | 3.29119e4    | 1612.87048   | 50.7395      |

**Enantioenriched sample 3ga**

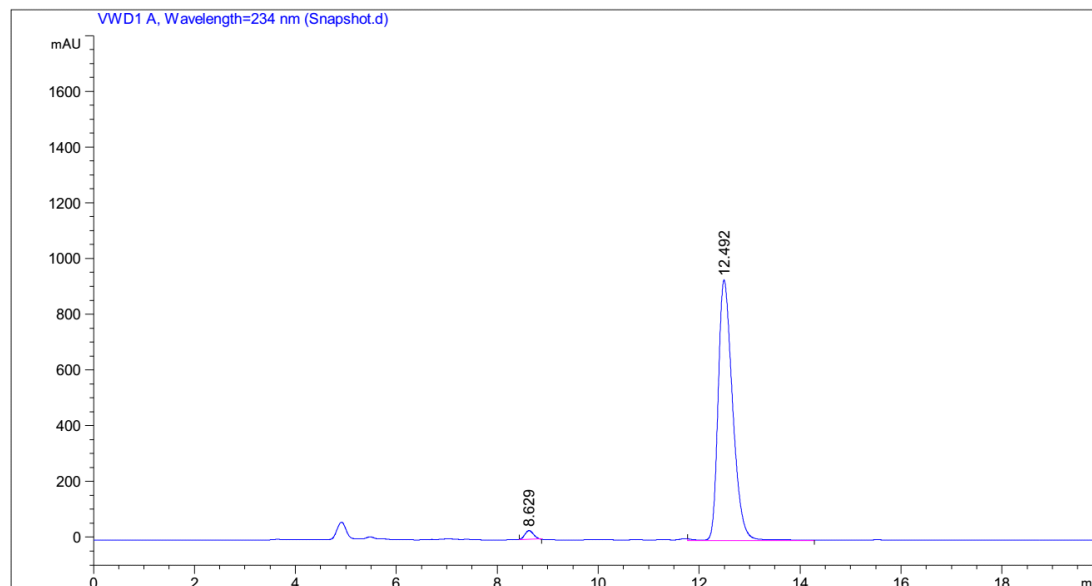

| Peak Name | RT [min] | Type | width [min] | Area [mAU*s] | Height [mAu] | Area ratio % |
|-----------|----------|------|-------------|--------------|--------------|--------------|
| 1         | 8.629    | MM   | 0.1947      | 362.27817    | 31.00468     | 1.9074       |
| 2         | 12.492   | MM   | 0.3323      | 1.86313e4    | 934.50745    | 98.0926      |

**Racemic sample 3ha:** HPLC (Daicel Chiralpak IC column (hexane/iPrOH = 90:10, flow rate: 1.0 mL/min,  $\lambda = 234$  nm)

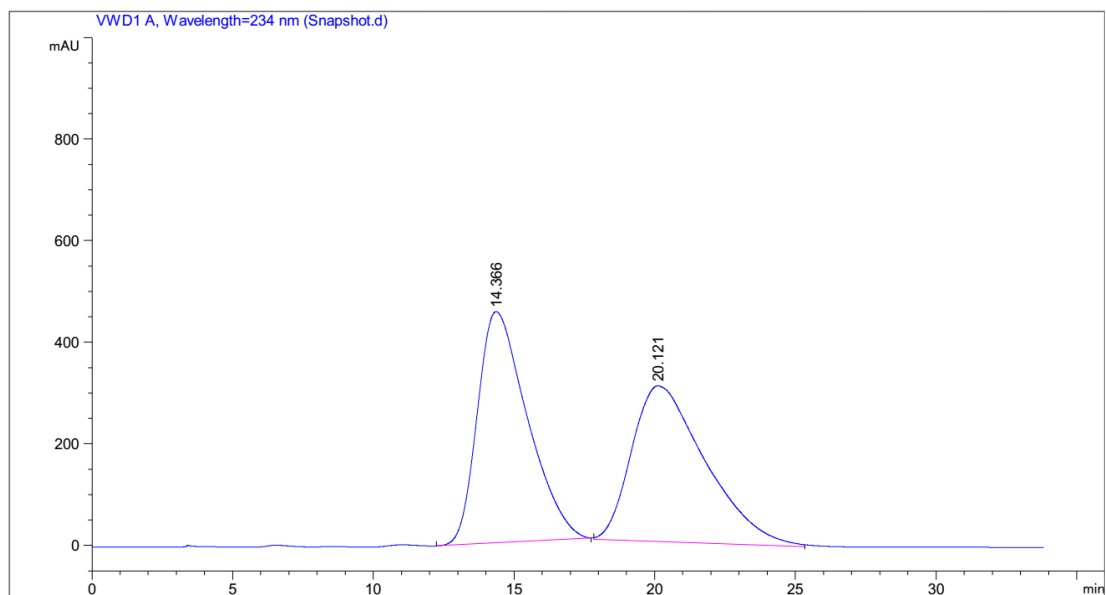

| Peak Name | RT [min] | Type | width [min] | Area [mAU*s] | Height [mAu] | Area ratio % |
|-----------|----------|------|-------------|--------------|--------------|--------------|
| 1         | 14.366   | BB   | 1.7663      | 5.60237e4    | 455.37814    | 50.1534      |
| 2         | 20.121   | MM   | 3.0289      | 5.56809e4    | 306.38831    | 49.8466      |

**Enantioenriched sample 3ha**

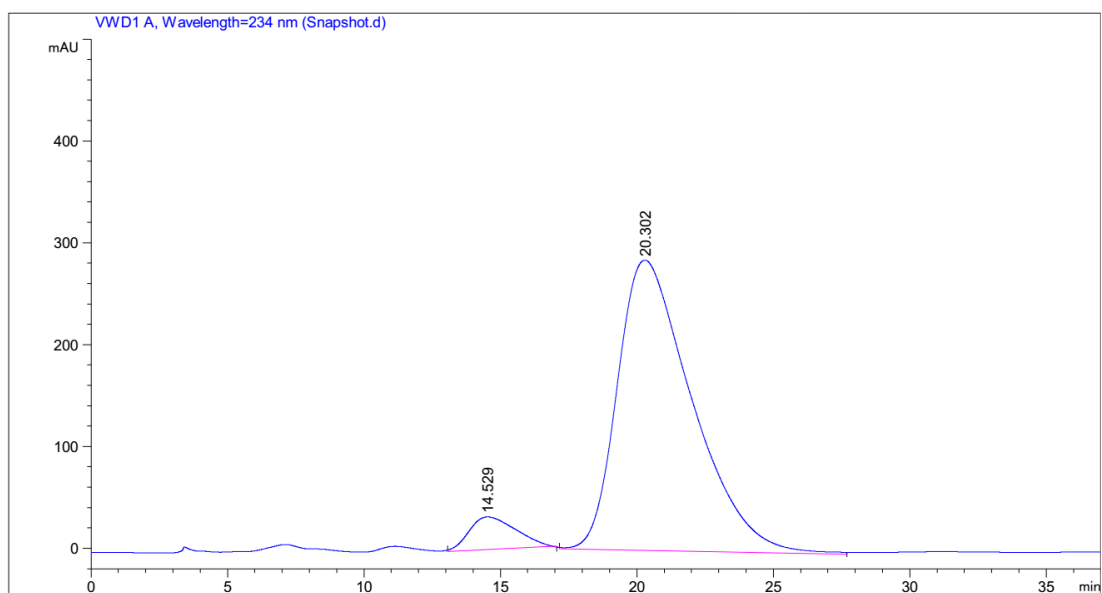

| Peak Name | RT [min] | Type | width [min] | Area [mAU*s] | Height [mAu] | Area ratio % |
|-----------|----------|------|-------------|--------------|--------------|--------------|
| 1         | 14.529   | MM   | 1.9680      | 3784.65601   | 32.05178     | 6.5237       |
| 2         | 20.302   | MM   | 3.1714      | 5.42296e4    | 284.98914    | 93.4763      |

**Racemic sample 3ia:** HPLC (Daicel Chiralpak IC column (hexane/iPrOH = 90:10, flow rate: 1.0 mL/min,  $\lambda = 254$  nm)

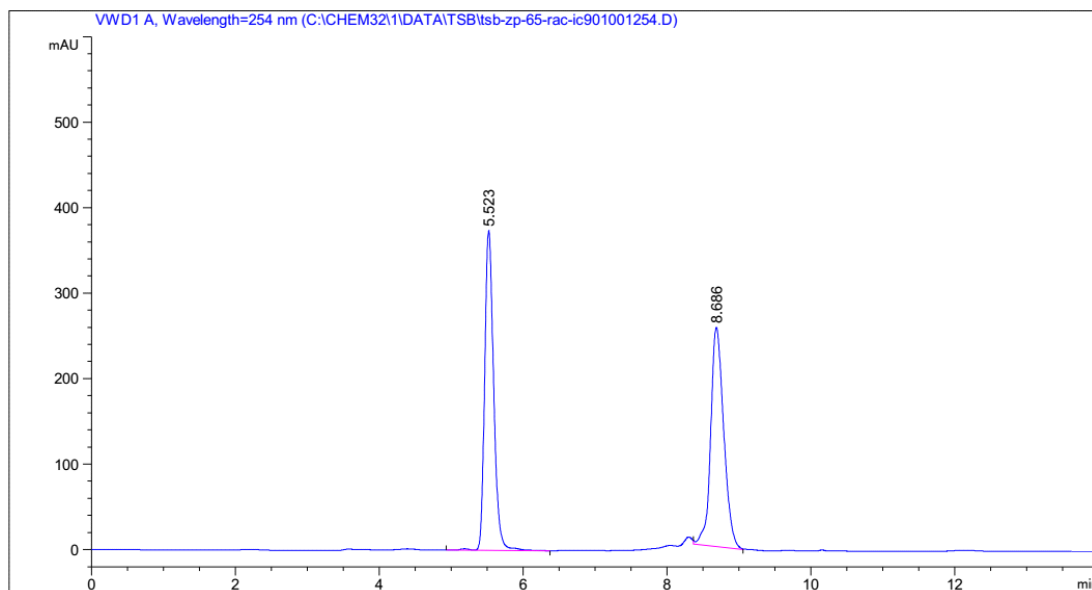

| Peak Name | RT [min] | Type | width [min] | Area [mAU*s] | Height [mAu] | Area ratio % |
|-----------|----------|------|-------------|--------------|--------------|--------------|
| 1         | 5.523    | VB R | 0.1331      | 3258.14771   | 374.06778    | 50.1689      |
| 2         | 8.686    | MM   | 0.2102      | 3236.21045   | 256.54895    | 49.8311      |

**Enantioenriched sample 3ia**

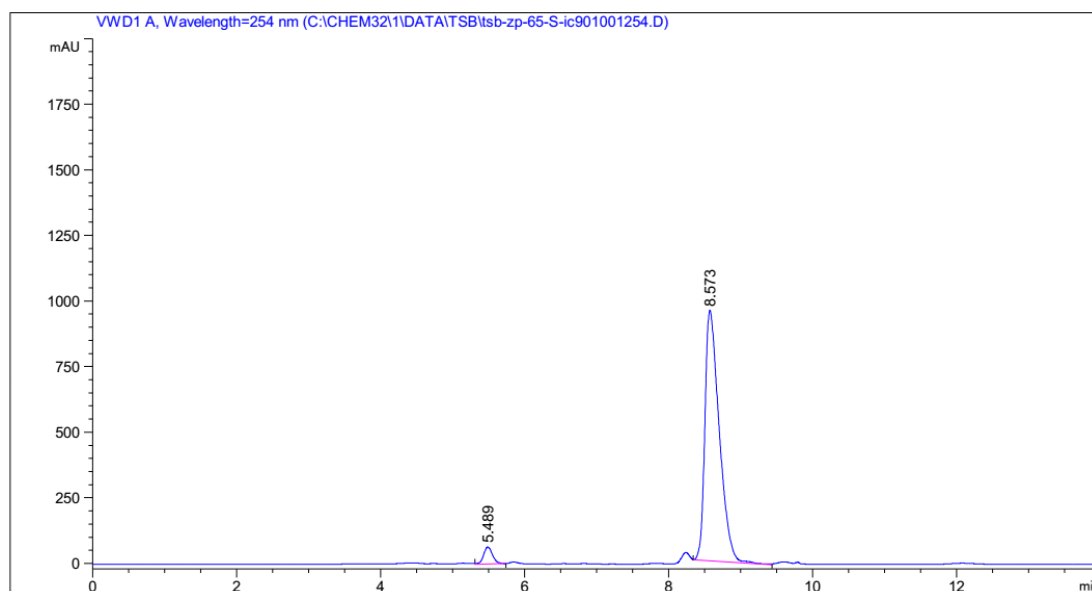

| Peak Name | RT [min] | Type | width [min] | Area [mAU*s] | Height [mAu] | Area ratio % |
|-----------|----------|------|-------------|--------------|--------------|--------------|
| 1         | 5.489    | MM   | 0.1427      | 553.73529    | 64.67613     | 4.0299       |
| 2         | 8.573    | MM   | 0.2302      | 1.31868e4    | 954.93646    | 95.9701      |

**Racemic sample 3ja:** HPLC (Daicel Chiralpak IA column (hexane/iPrOH = 98:2, flow rate: 1.0 mL/min,  $\lambda = 225$  nm)

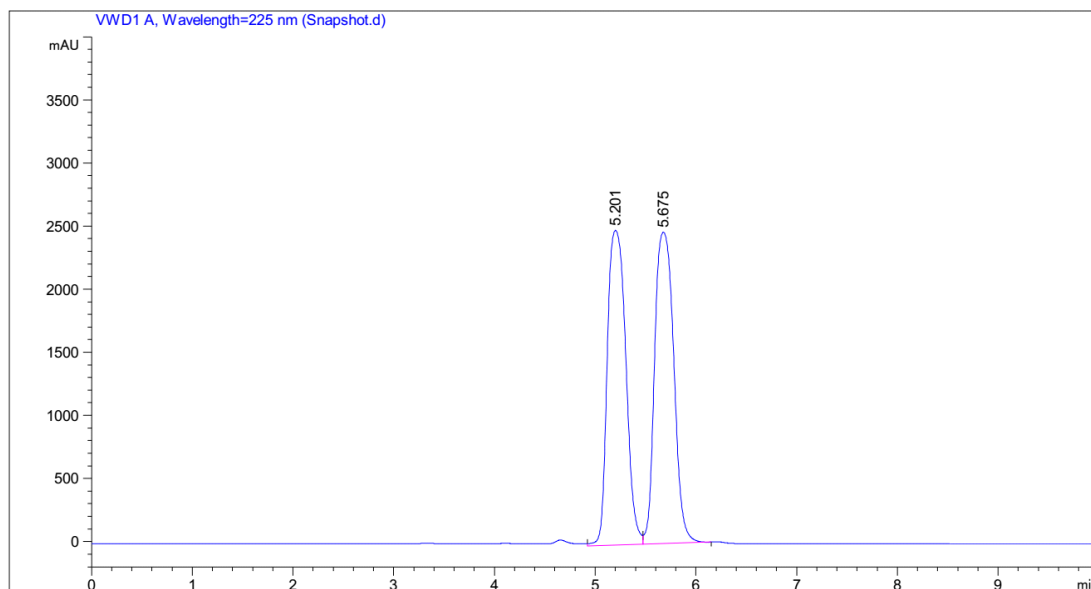

| Peak Name | RT [min] | Type | width [min] | Area [mAU*s] | Height [mAu] | Area ratio % |
|-----------|----------|------|-------------|--------------|--------------|--------------|
| 1         | 5.201    | MF   | 0.2125      | 3.17912e4    | 2493.34839   | 49.5392      |
| 2         | 5.675    | FM   | 0.2187      | 3.23827e4    | 2467.29688   | 50.4608      |

**Enantioenriched sample 3ja**

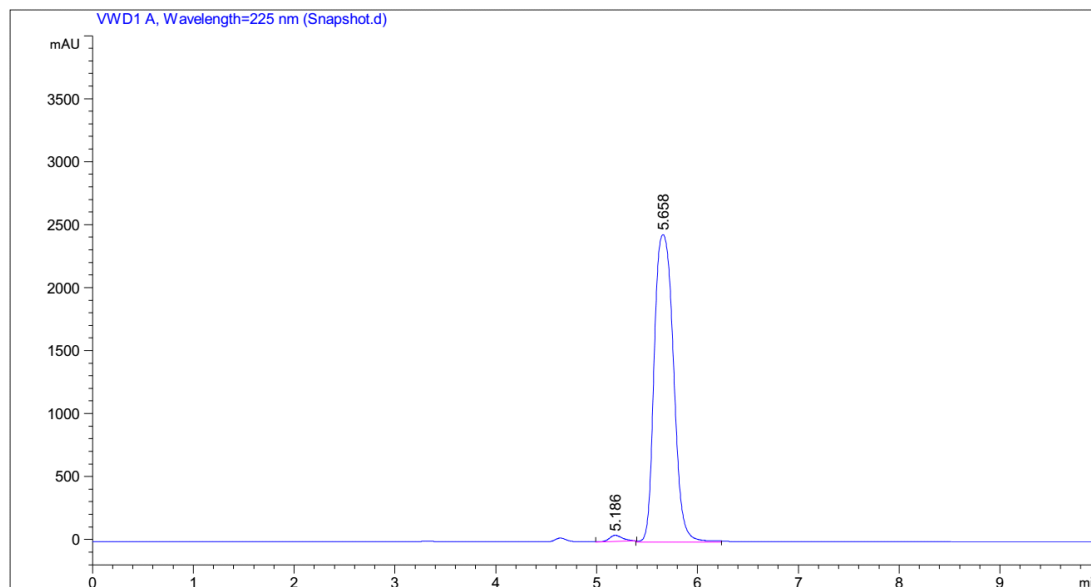

| Peak Name | RT [min] | Type | width [min] | Area [mAU*s] | Height [mAu] | Area ratio % |
|-----------|----------|------|-------------|--------------|--------------|--------------|
| 1         | 5.186    | MM   | 0.1471      | 427.08121    | 48.38269     | 1.3069       |
| 2         | 5.658    | MM   | 0.2201      | 3.22510e4    | 2442.00464   | 98.6931      |



**Racemic sample 3ka:** HPLC (Daicel Chiralpak OD-H column (hexane/iPrOH = 99:1, flow rate: 1.0 mL/min,  $\lambda=224$  nm)

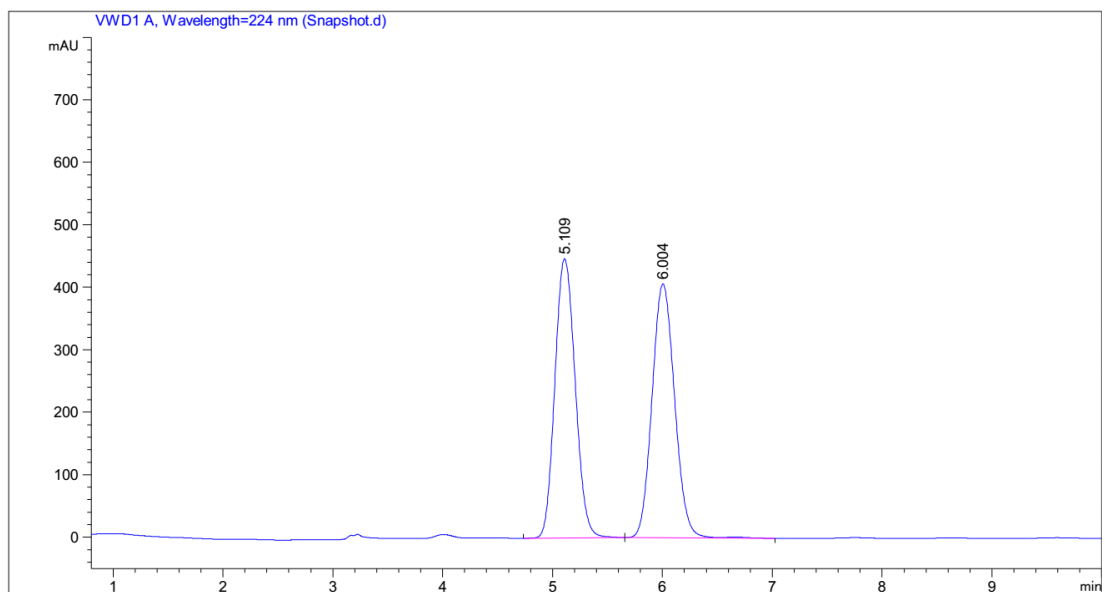

| Peak Name | RT [min] | Type | width [min] | Area [mAU*s] | Height [mAu] | Area ratio % |
|-----------|----------|------|-------------|--------------|--------------|--------------|
| 1         | 5.109    | BB   | 0.2026      | 5731.81152   | 446.95035    | 49.6701      |
| 2         | 6.004    | BV R | 0.2239      | 5807.95166   | 406.15750    | 50.3299      |

**Enantioenriched sample 3ka**

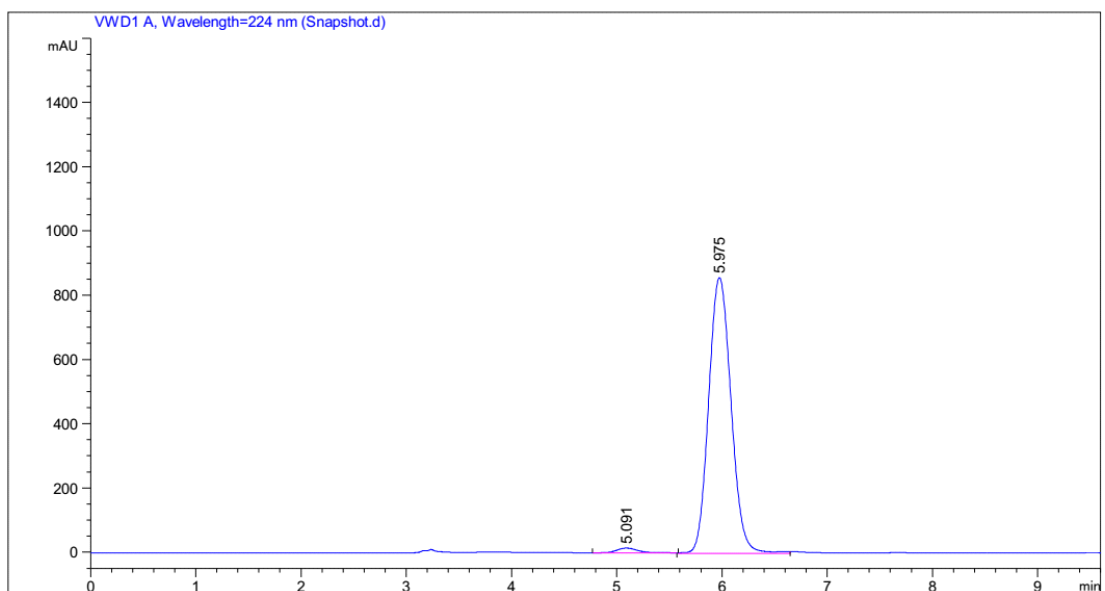

| Peak Name | RT [min] | Type | width [min] | Area [mAU*s] | Height [mAu] | Area ratio % |
|-----------|----------|------|-------------|--------------|--------------|--------------|
| 1         | 5.091    | BV   | 0.2120      | 197.38728    | 14.57574     | 1.5340       |
| 2         | 5.975    | MM   | 0.2462      | 1.26698e4    | 857.74286    | 98.4660      |

**Racemic sample 3la:** HPLC (Daicel Chiralpak ID column (hexane/iPrOH = 99:1, flow rate: 1.0 mL/min,  $\lambda=225$  nm)

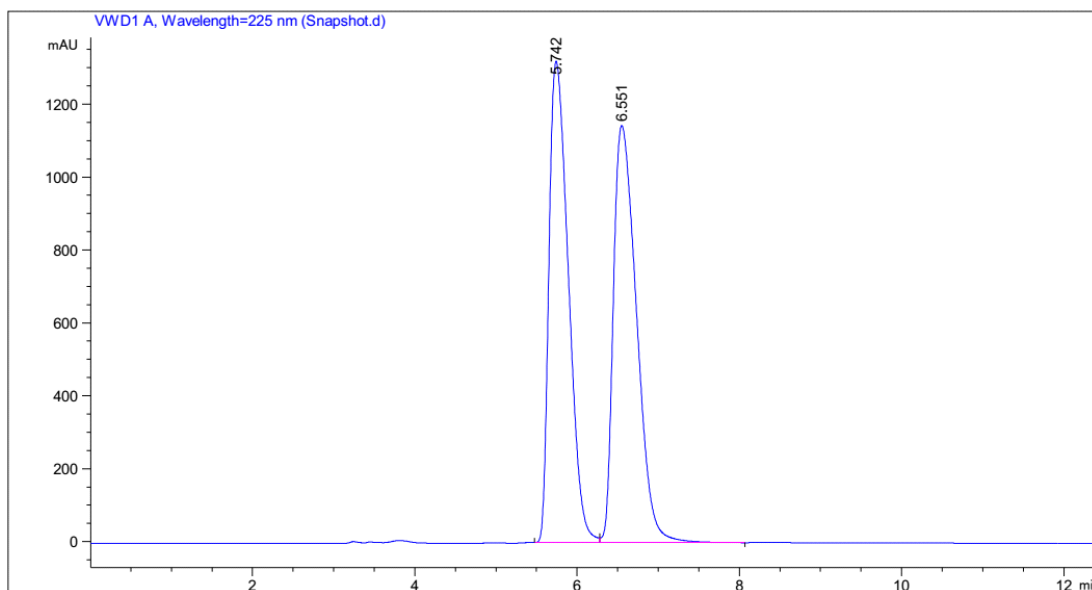

| Peak Name | RT [min] | Type | width [min] | Area [mAU*s] | Height [mAu] | Area ratio % |
|-----------|----------|------|-------------|--------------|--------------|--------------|
| 1         | 5.742    | BV   | 0.2655      | 2.18991e4    | 1320.29614   | 49.1397      |
| 2         | 6.551    | VB   | 0.3191      | 2.26659e4    | 1144.37134   | 50.8603      |

**Enantioenriched sample 3la**

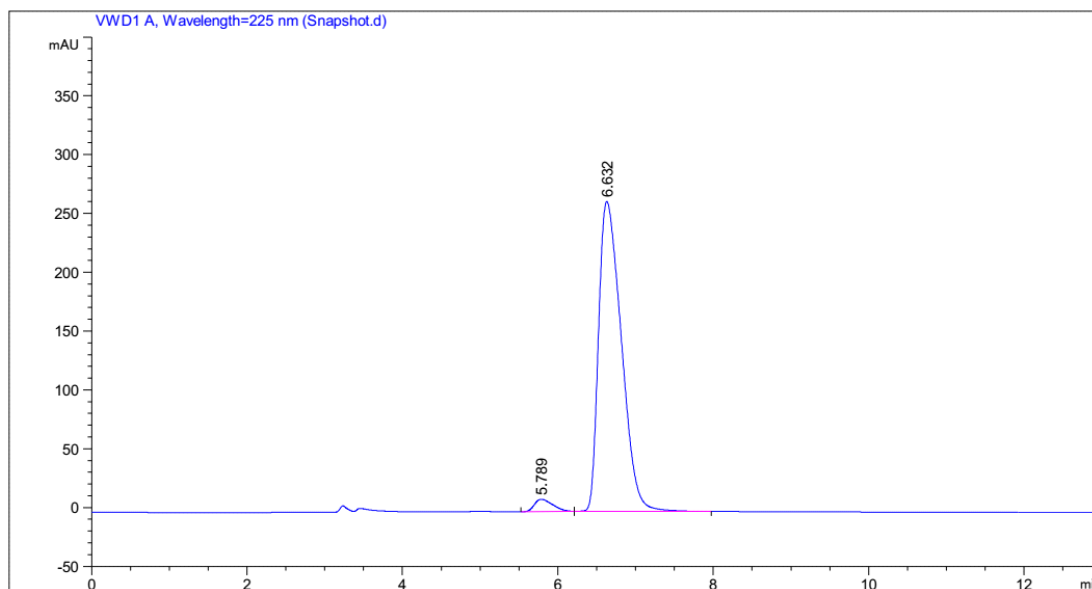

| Peak Name | RT [min] | Type | width [min] | Area [mAU*s] | Height [mAu] | Area ratio % |
|-----------|----------|------|-------------|--------------|--------------|--------------|
| 1         | 5.789    | BB   | 0.2508      | 166.12143    | 10.42877     | 3.0165       |
| 2         | 6.632    | BB   | 0.3296      | 5340.97705   | 263.35590    | 96.9835      |

**Racemic sample 3ma:** HPLC (Daicel Chiralpak IC column (hexane/iPrOH = 90:10, flow rate: 1.0 mL/min,  $\lambda = 254$  nm)

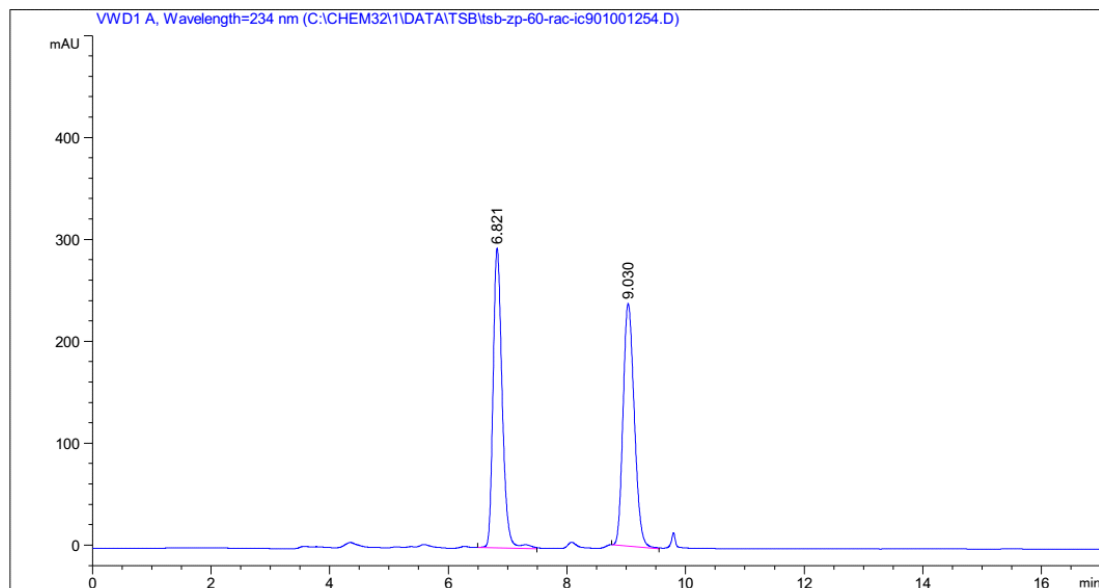

| Peak Name | RT [min] | Type | width [min] | Area [mAU*s] | Height [mAu] | Area ratio % |
|-----------|----------|------|-------------|--------------|--------------|--------------|
| 1         | 6.821    | MM   | 0.1776      | 3132.41113   | 293.98260    | 50.1178      |
| 2         | 9.030    | MM   | 0.2183      | 3117.68823   | 238.07489    | 49.8822      |

**Enantioenriched sample 3ma**

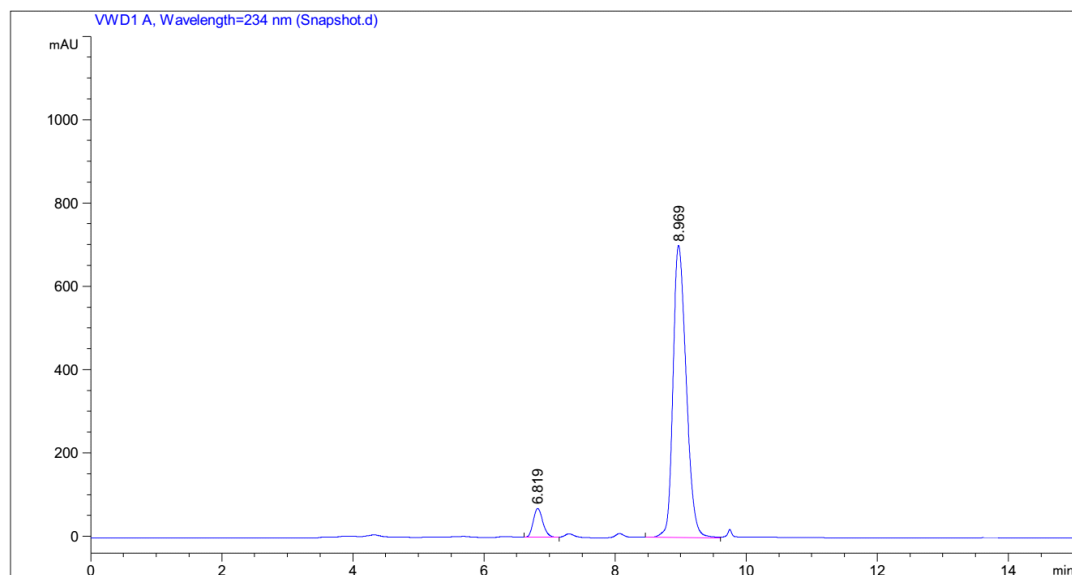

| Peak Name | RT [min] | Type | width [min] | Area [mAU*s] | Height [mAu] | Area ratio % |
|-----------|----------|------|-------------|--------------|--------------|--------------|
| 1         | 6.819    | MM   | 0.1654      | 679.97943    | 68.50309     | 6.5137       |
| 2         | 8.969    | MM   | 0.2322      | 9759.23730   | 700.63928    | 93.4863      |

**Racemic sample 3na:** HPLC (Daicel Chiralpak IC column (hexane/iPrOH = 90:10, flow rate: 1.0 mL/min,  $\lambda = 254$  nm)

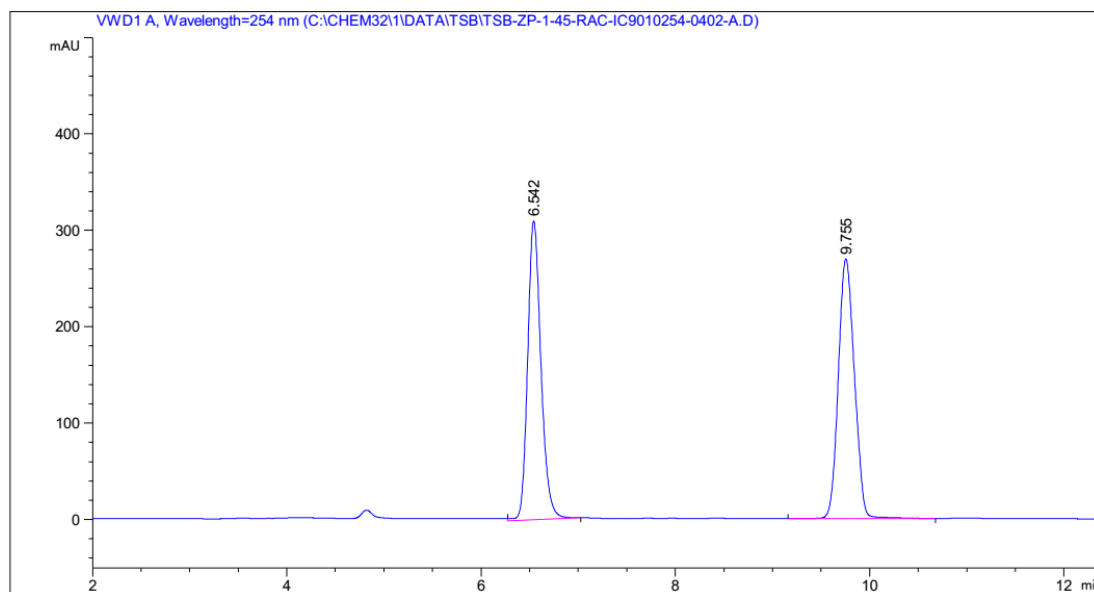

| Peak Name | RT [min] | Type | width [min] | Area [mAU*s] | Height [mAu] | Area ratio % |
|-----------|----------|------|-------------|--------------|--------------|--------------|
| 1         | 6.542    | MM   | 0.1583      | 2945.53979   | 310.12479    | 48.7028      |
| 2         | 9.755    | BB   | 0.1773      | 3102.45313   | 269.44174    | 51.2972      |

**Enantioenriched sample 3na**

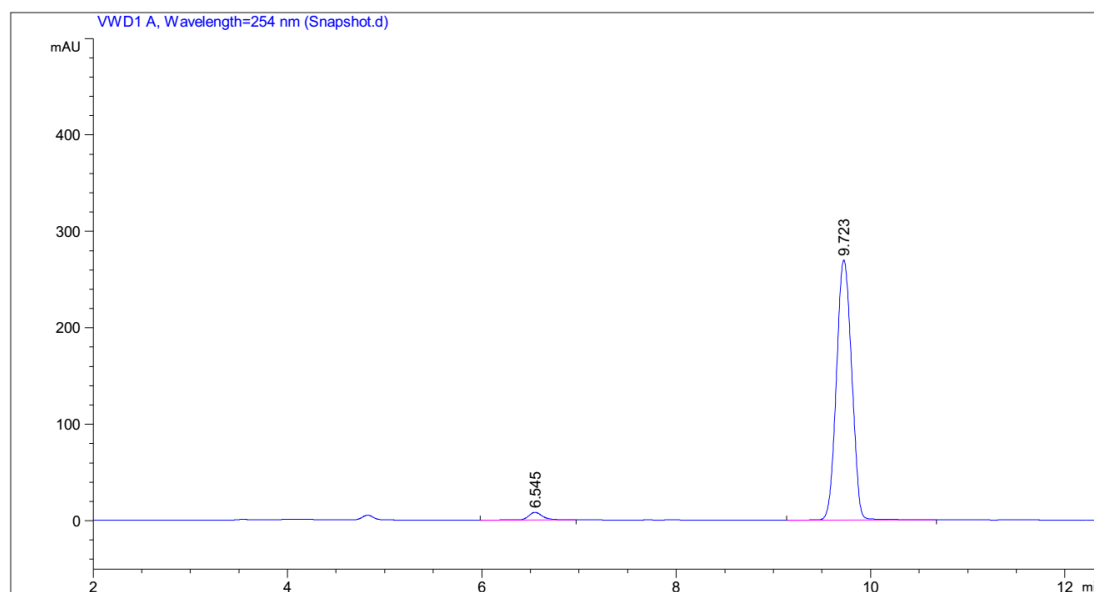

| Peak Name | RT [min] | Type | width [min] | Area [mAU*s] | Height [mAu] | Area ratio % |
|-----------|----------|------|-------------|--------------|--------------|--------------|
| 1         | 6.545    | VB R | 0.1564      | 81.20518     | 7.86732      | 2.6897       |
| 2         | 9.723    | BB   | 0.1721      | 2937.91357   | 269.58154    | 97.3103      |

**Racemic sample 7:** HPLC (Daicel Chiralpak OD column (hexane/iPrOH = 90:10, flow rate: 1.0 mL/min,  $\lambda = 224$  nm)

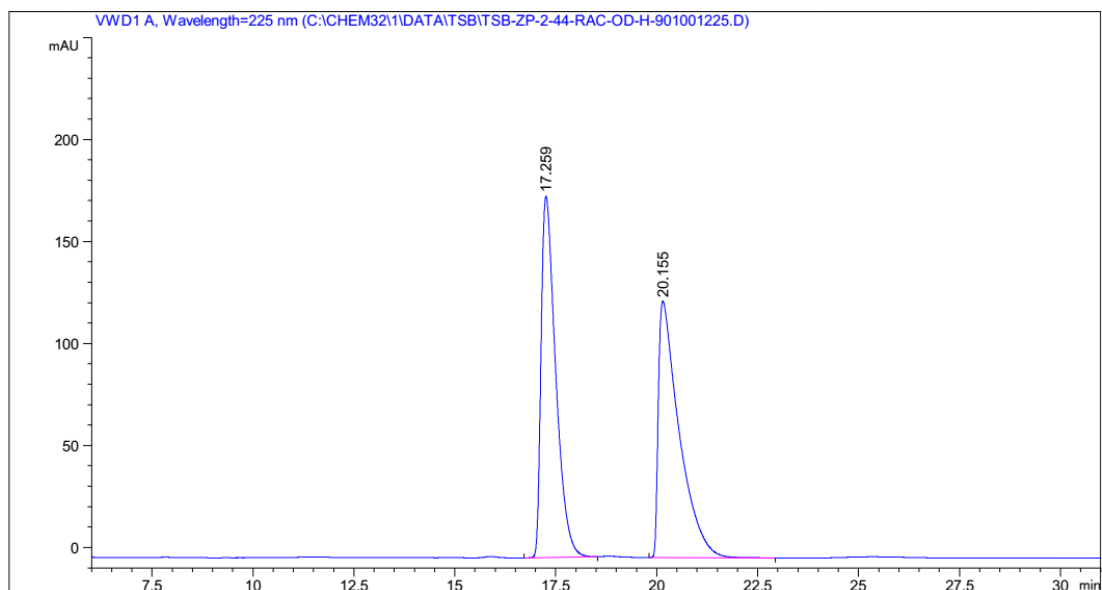

| Peak Name | RT [min] | Type | width [min] | Area [mAU*s] | Height [mAu] | Area ratio % |
|-----------|----------|------|-------------|--------------|--------------|--------------|
| 1         | 22.643   | BV   | 0.5558      | 7019.26758   | 189.19167    | 49.8638      |
| 2         | 24.060   | VB   | 0.7345      | 7057.61279   | 133.76520    | 50.1362      |

**Enantioenriched sample 7**

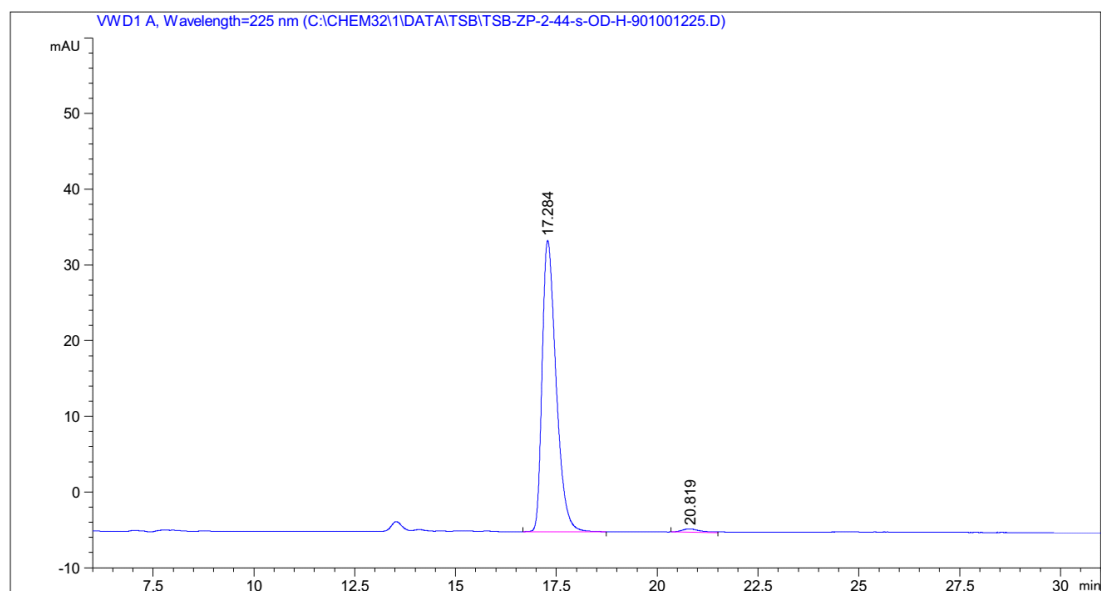

| Peak Name | RT [min] | Type | width [min] | Area [mAU*s] | Height [mAu] | Area ratio % |
|-----------|----------|------|-------------|--------------|--------------|--------------|
| 1         | 22.675   | BB   | 0.5514      | 4986.94482   | 134.87524    | 98.2886      |
| 2         | 25.206   | BB   | 0.5374      | 86.83026     | 2.46252      | 1.7114       |

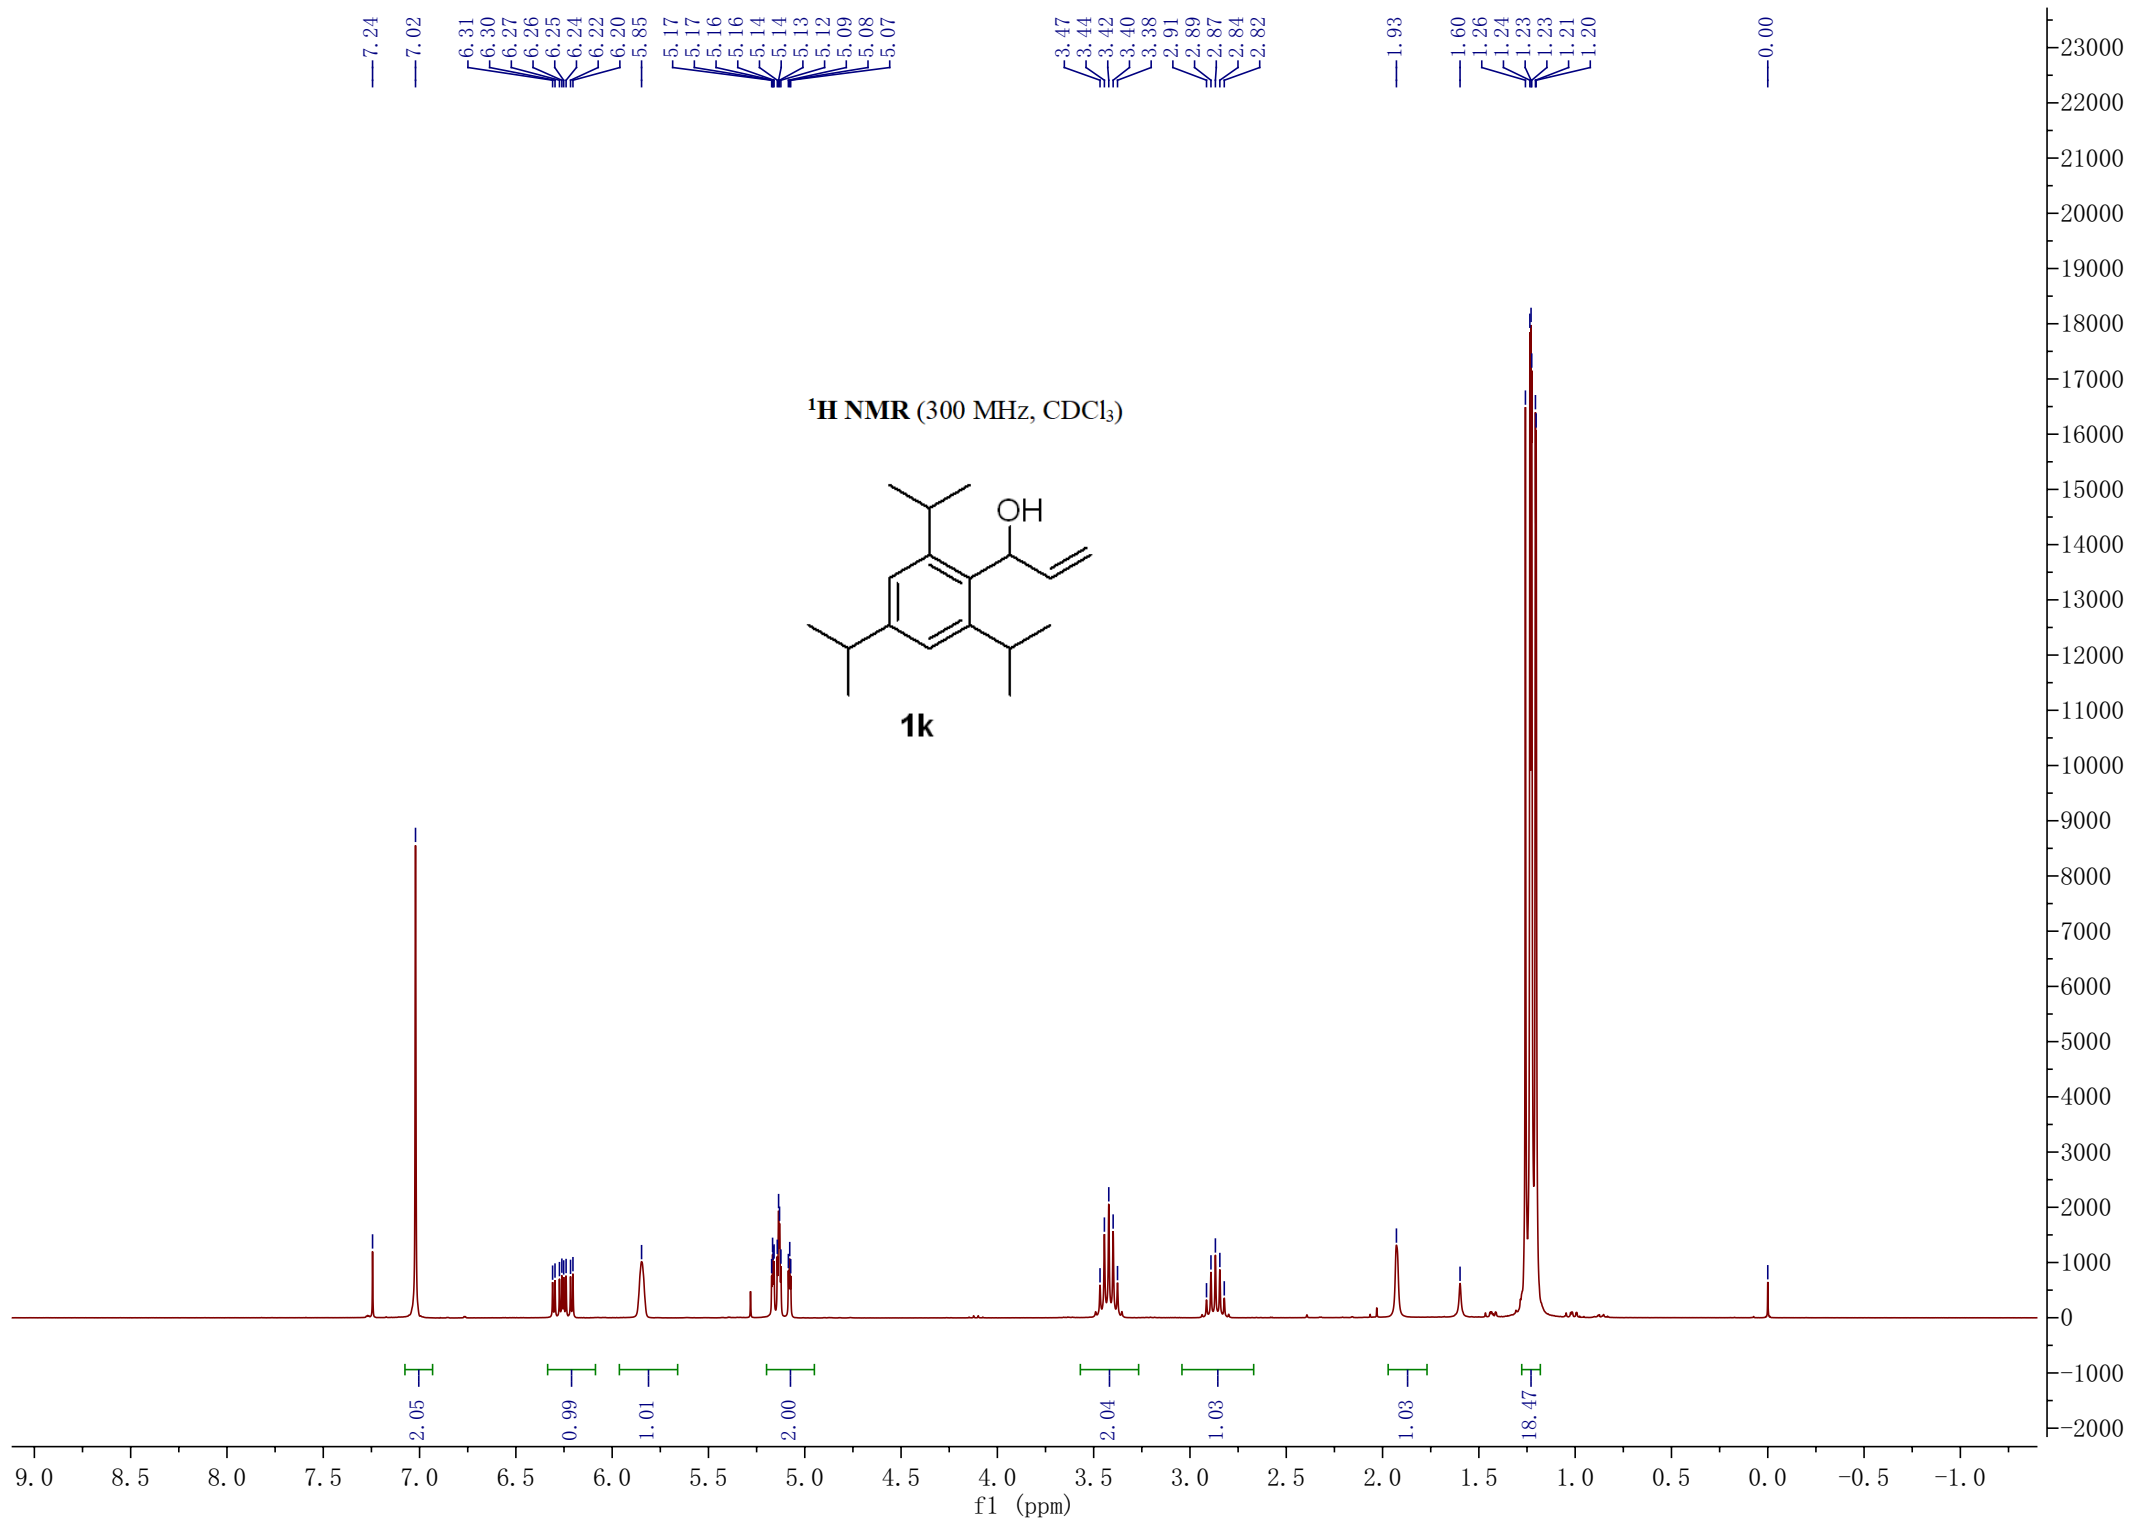

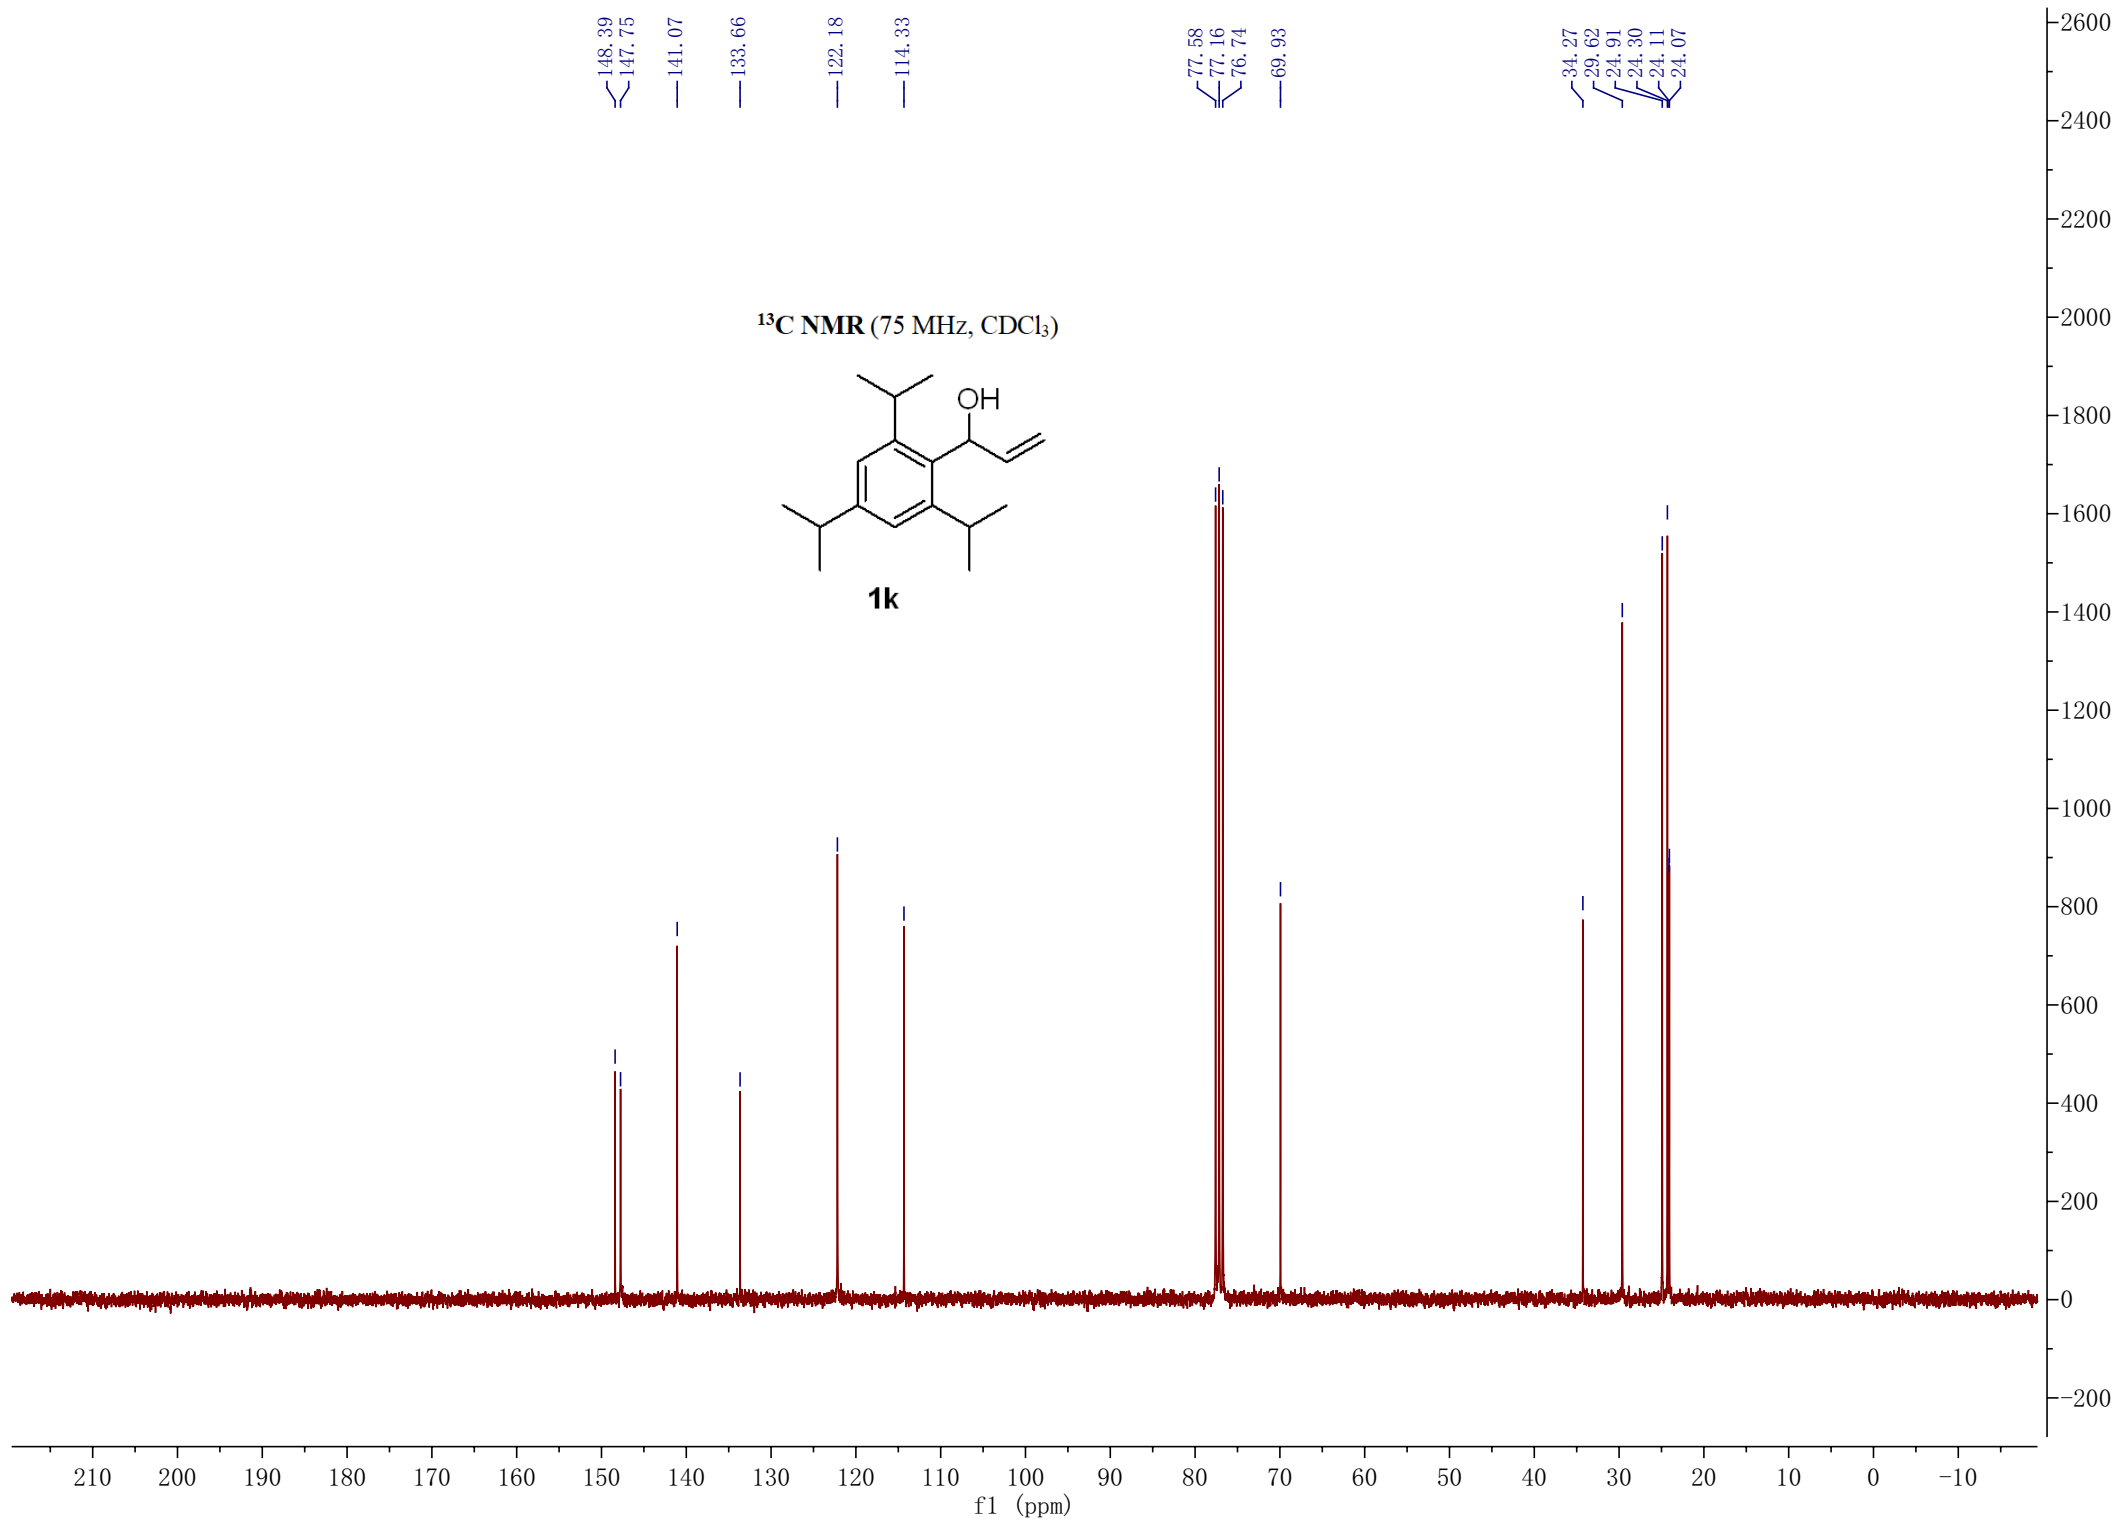

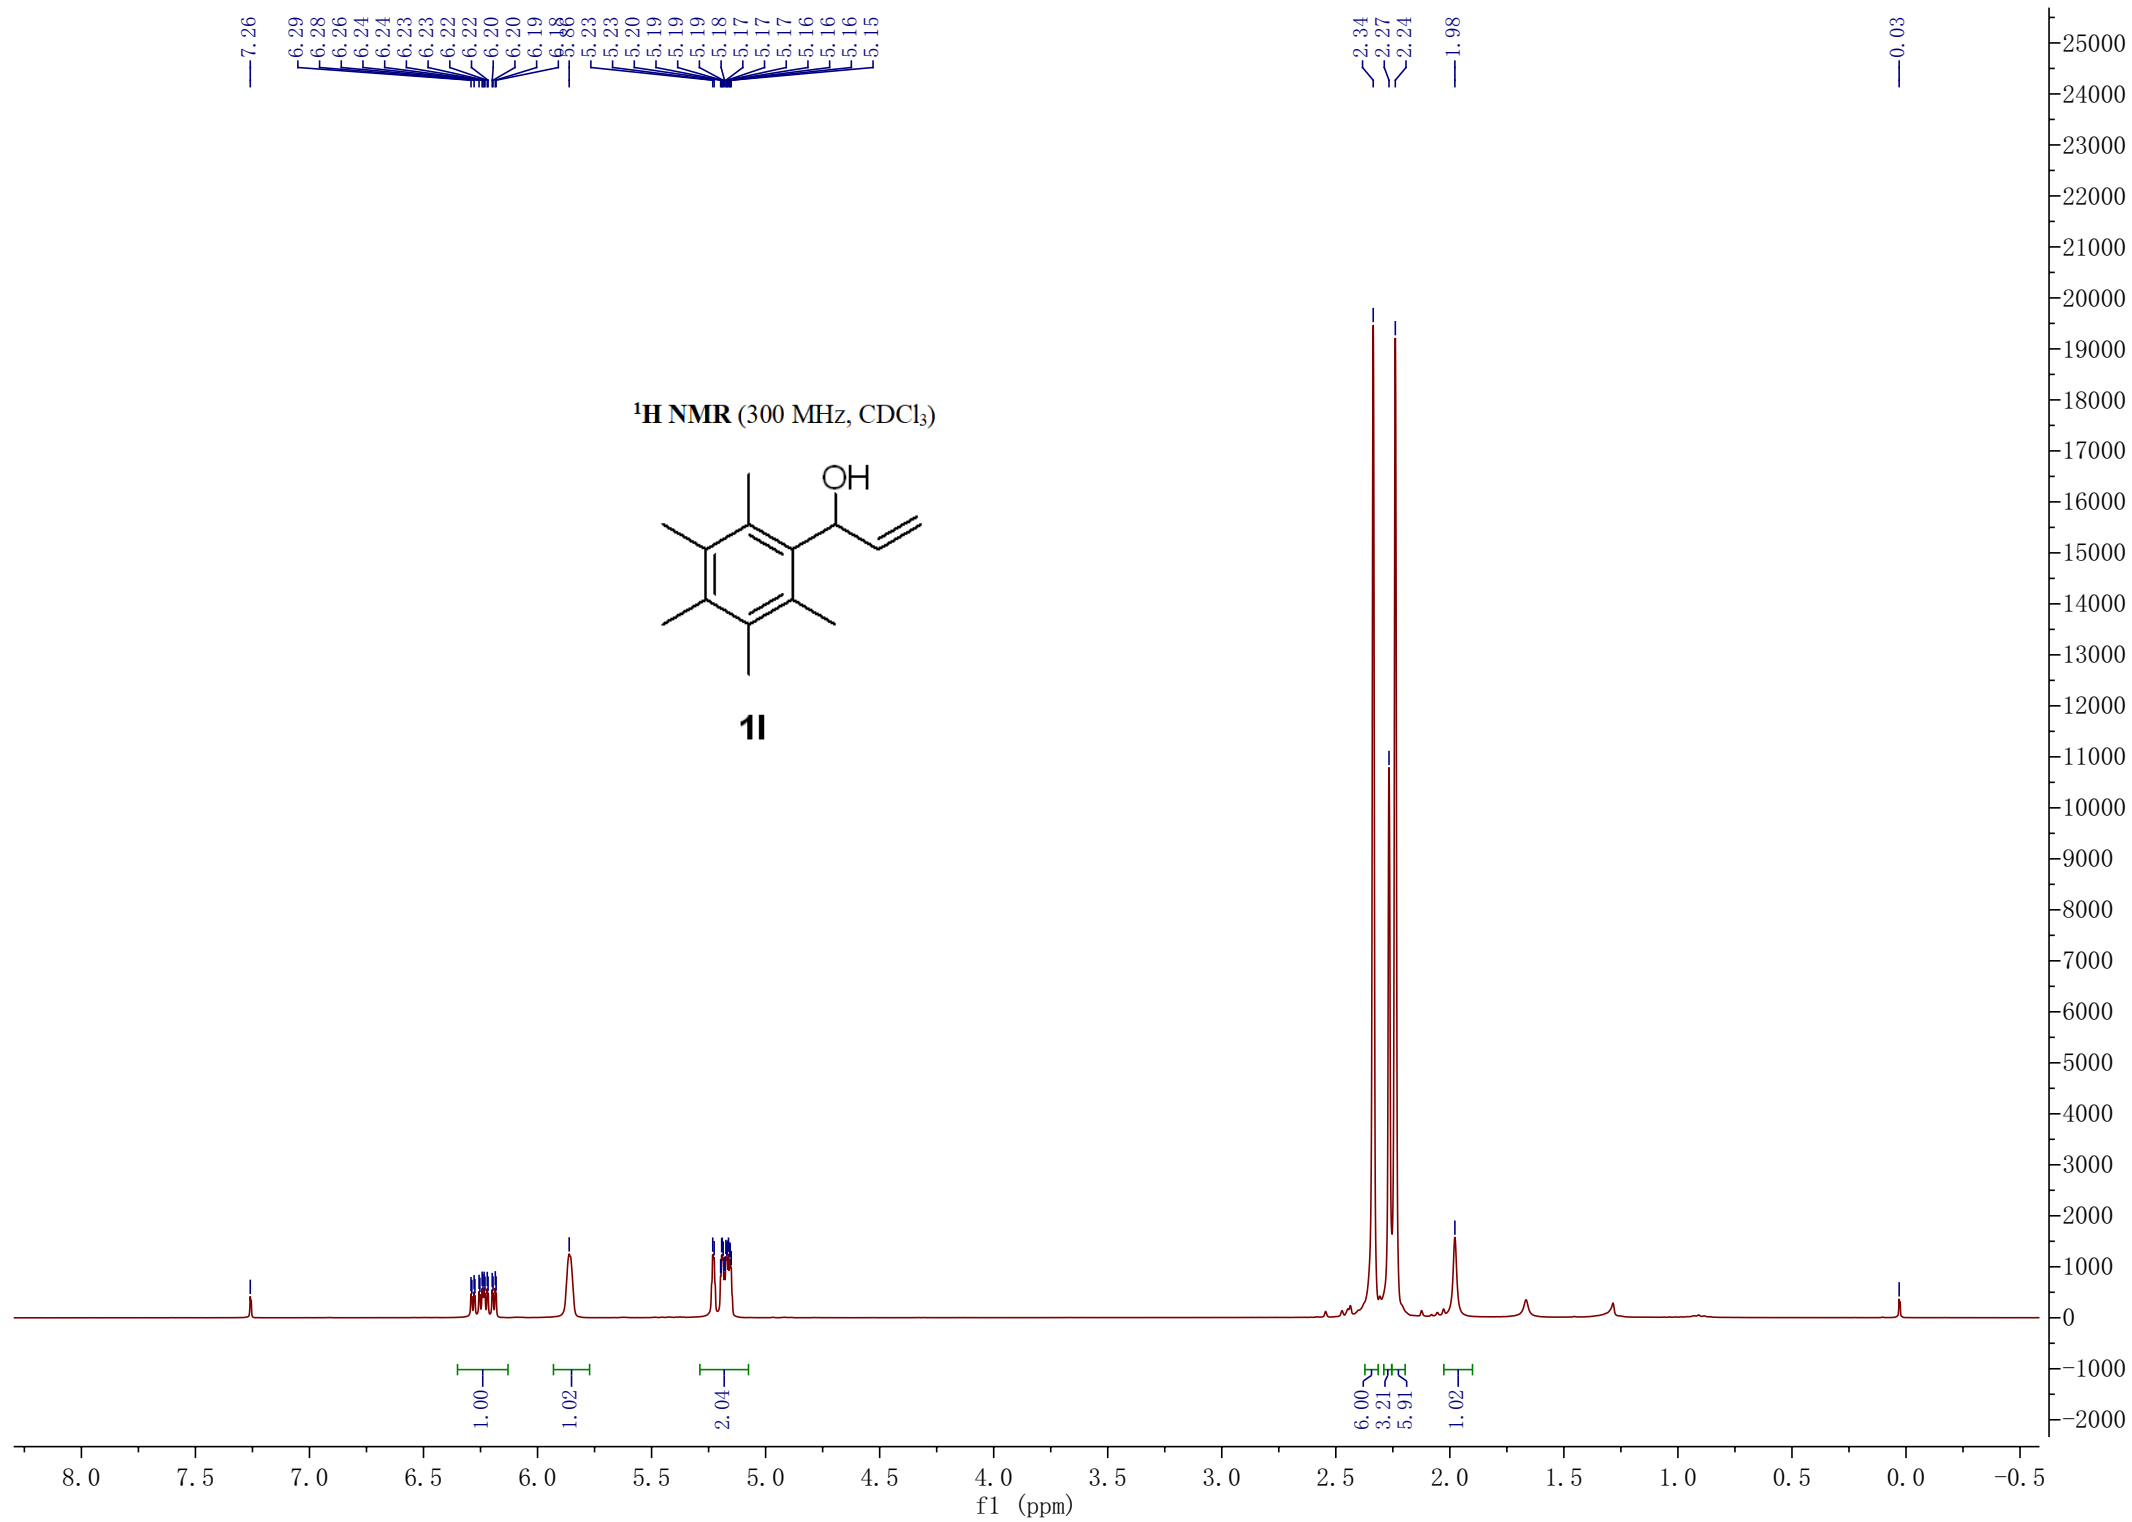



<sup>13</sup>C NMR (75 MHz, CDCl<sub>3</sub>)

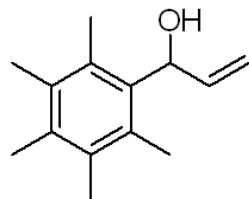

**11**

139.89  
136.00  
134.79  
133.52  
132.53

114.42

77.58  
77.10  
76.74  
72.21

17.38  
16.82

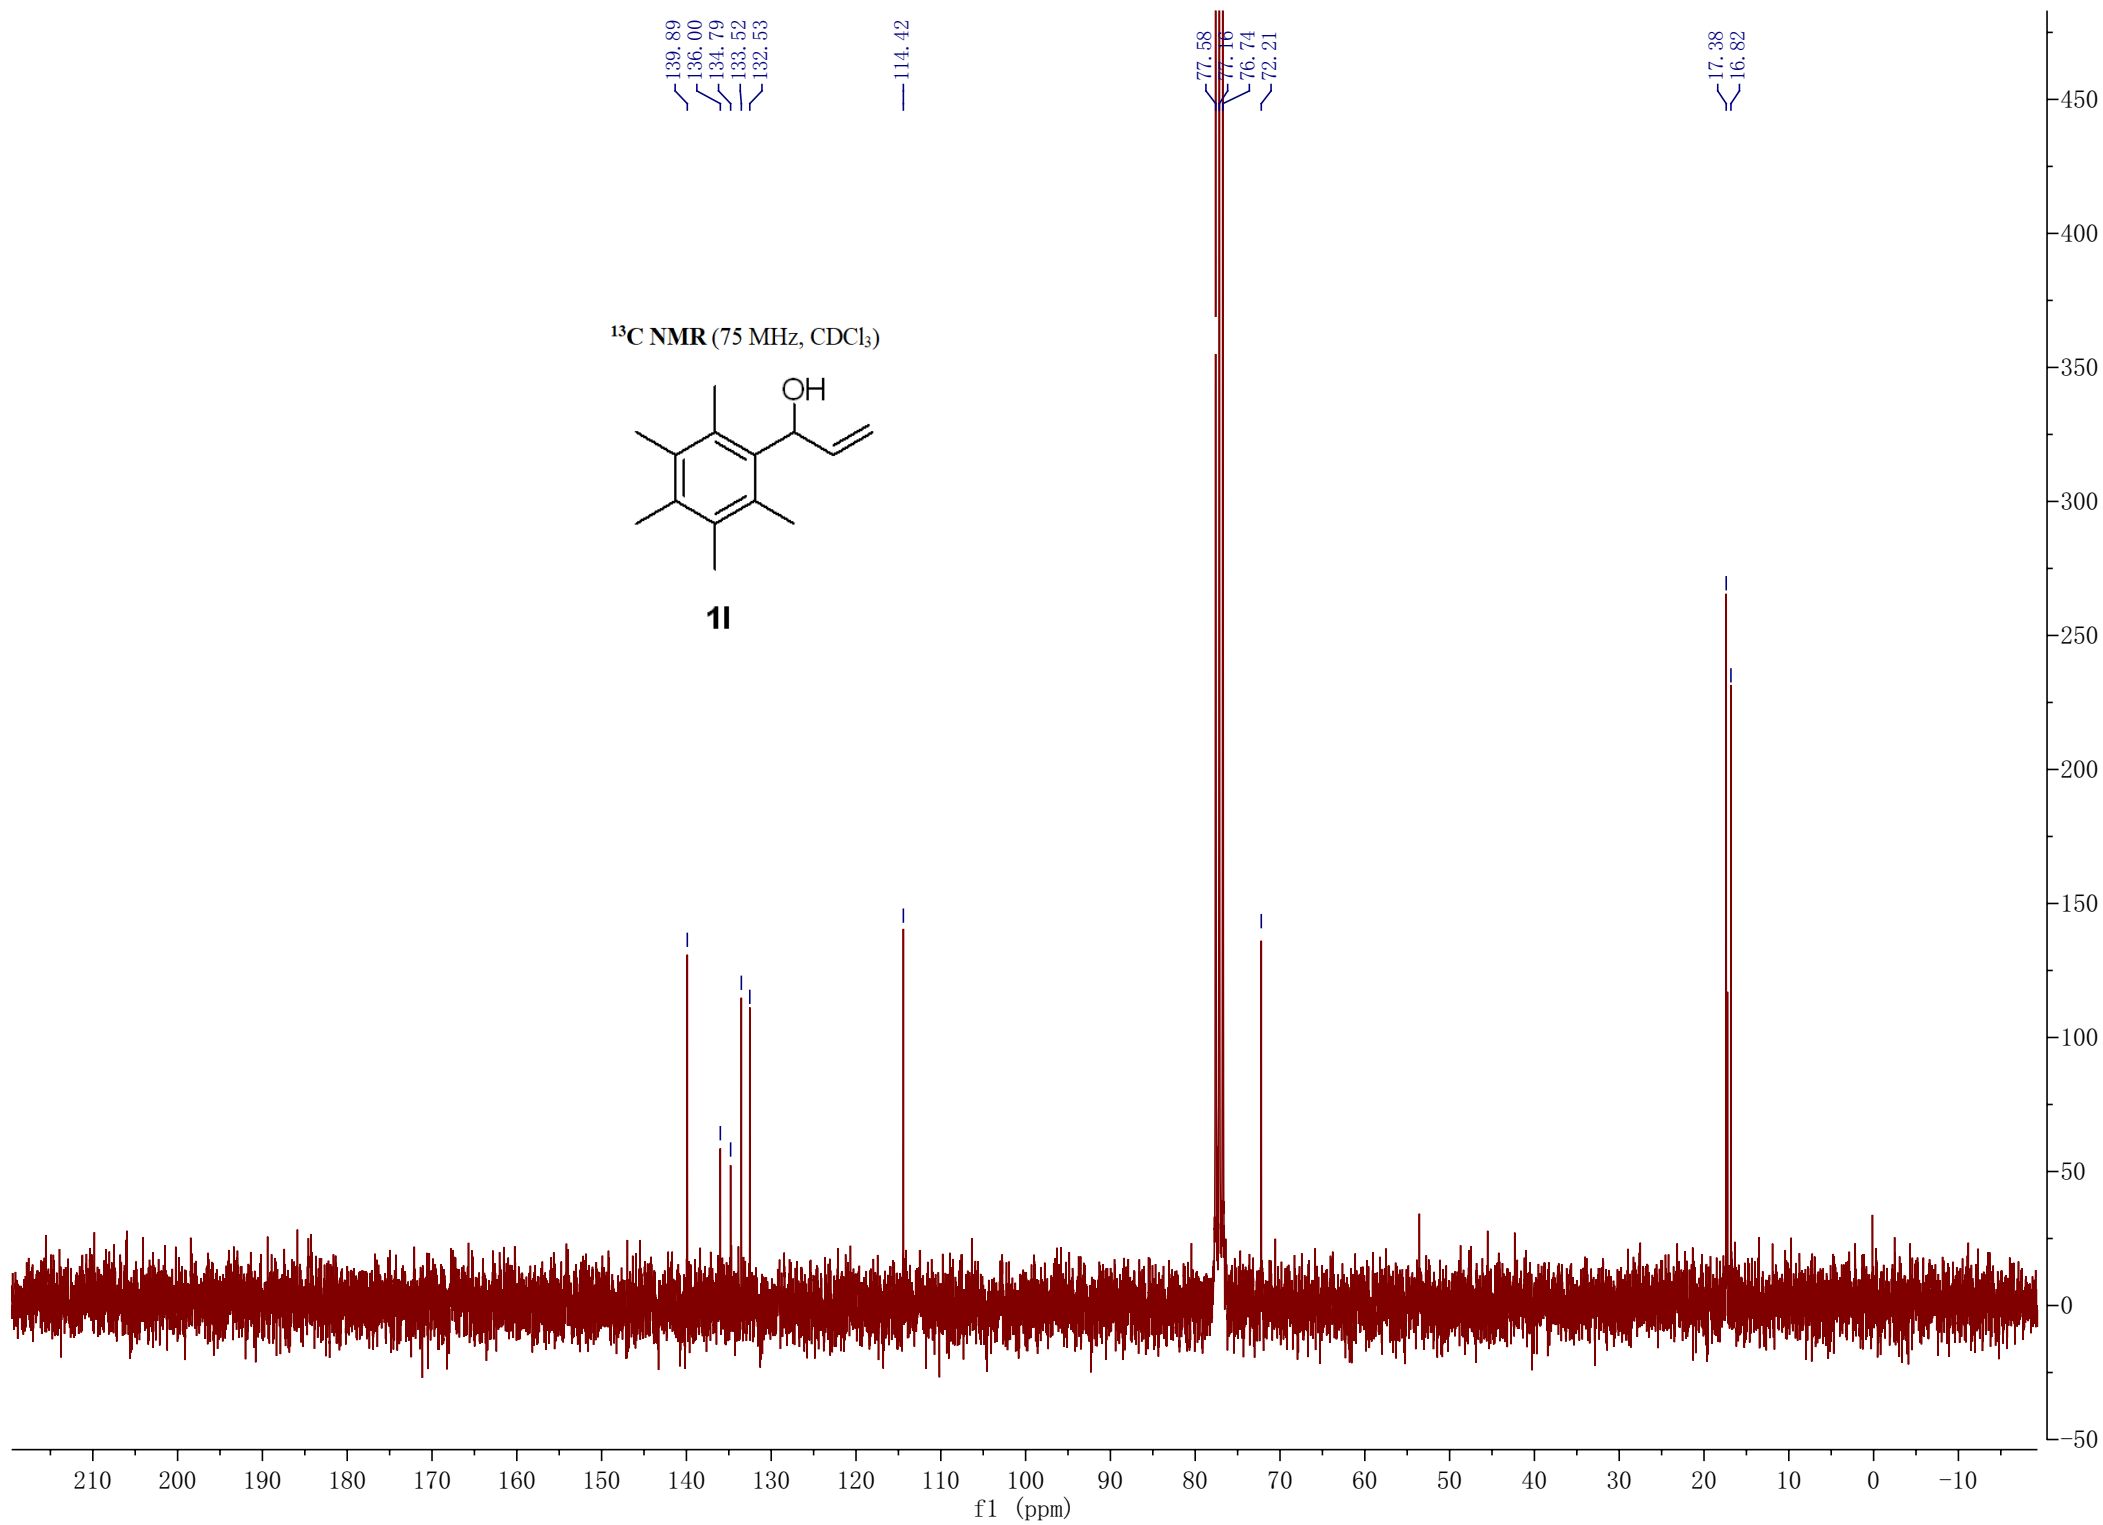

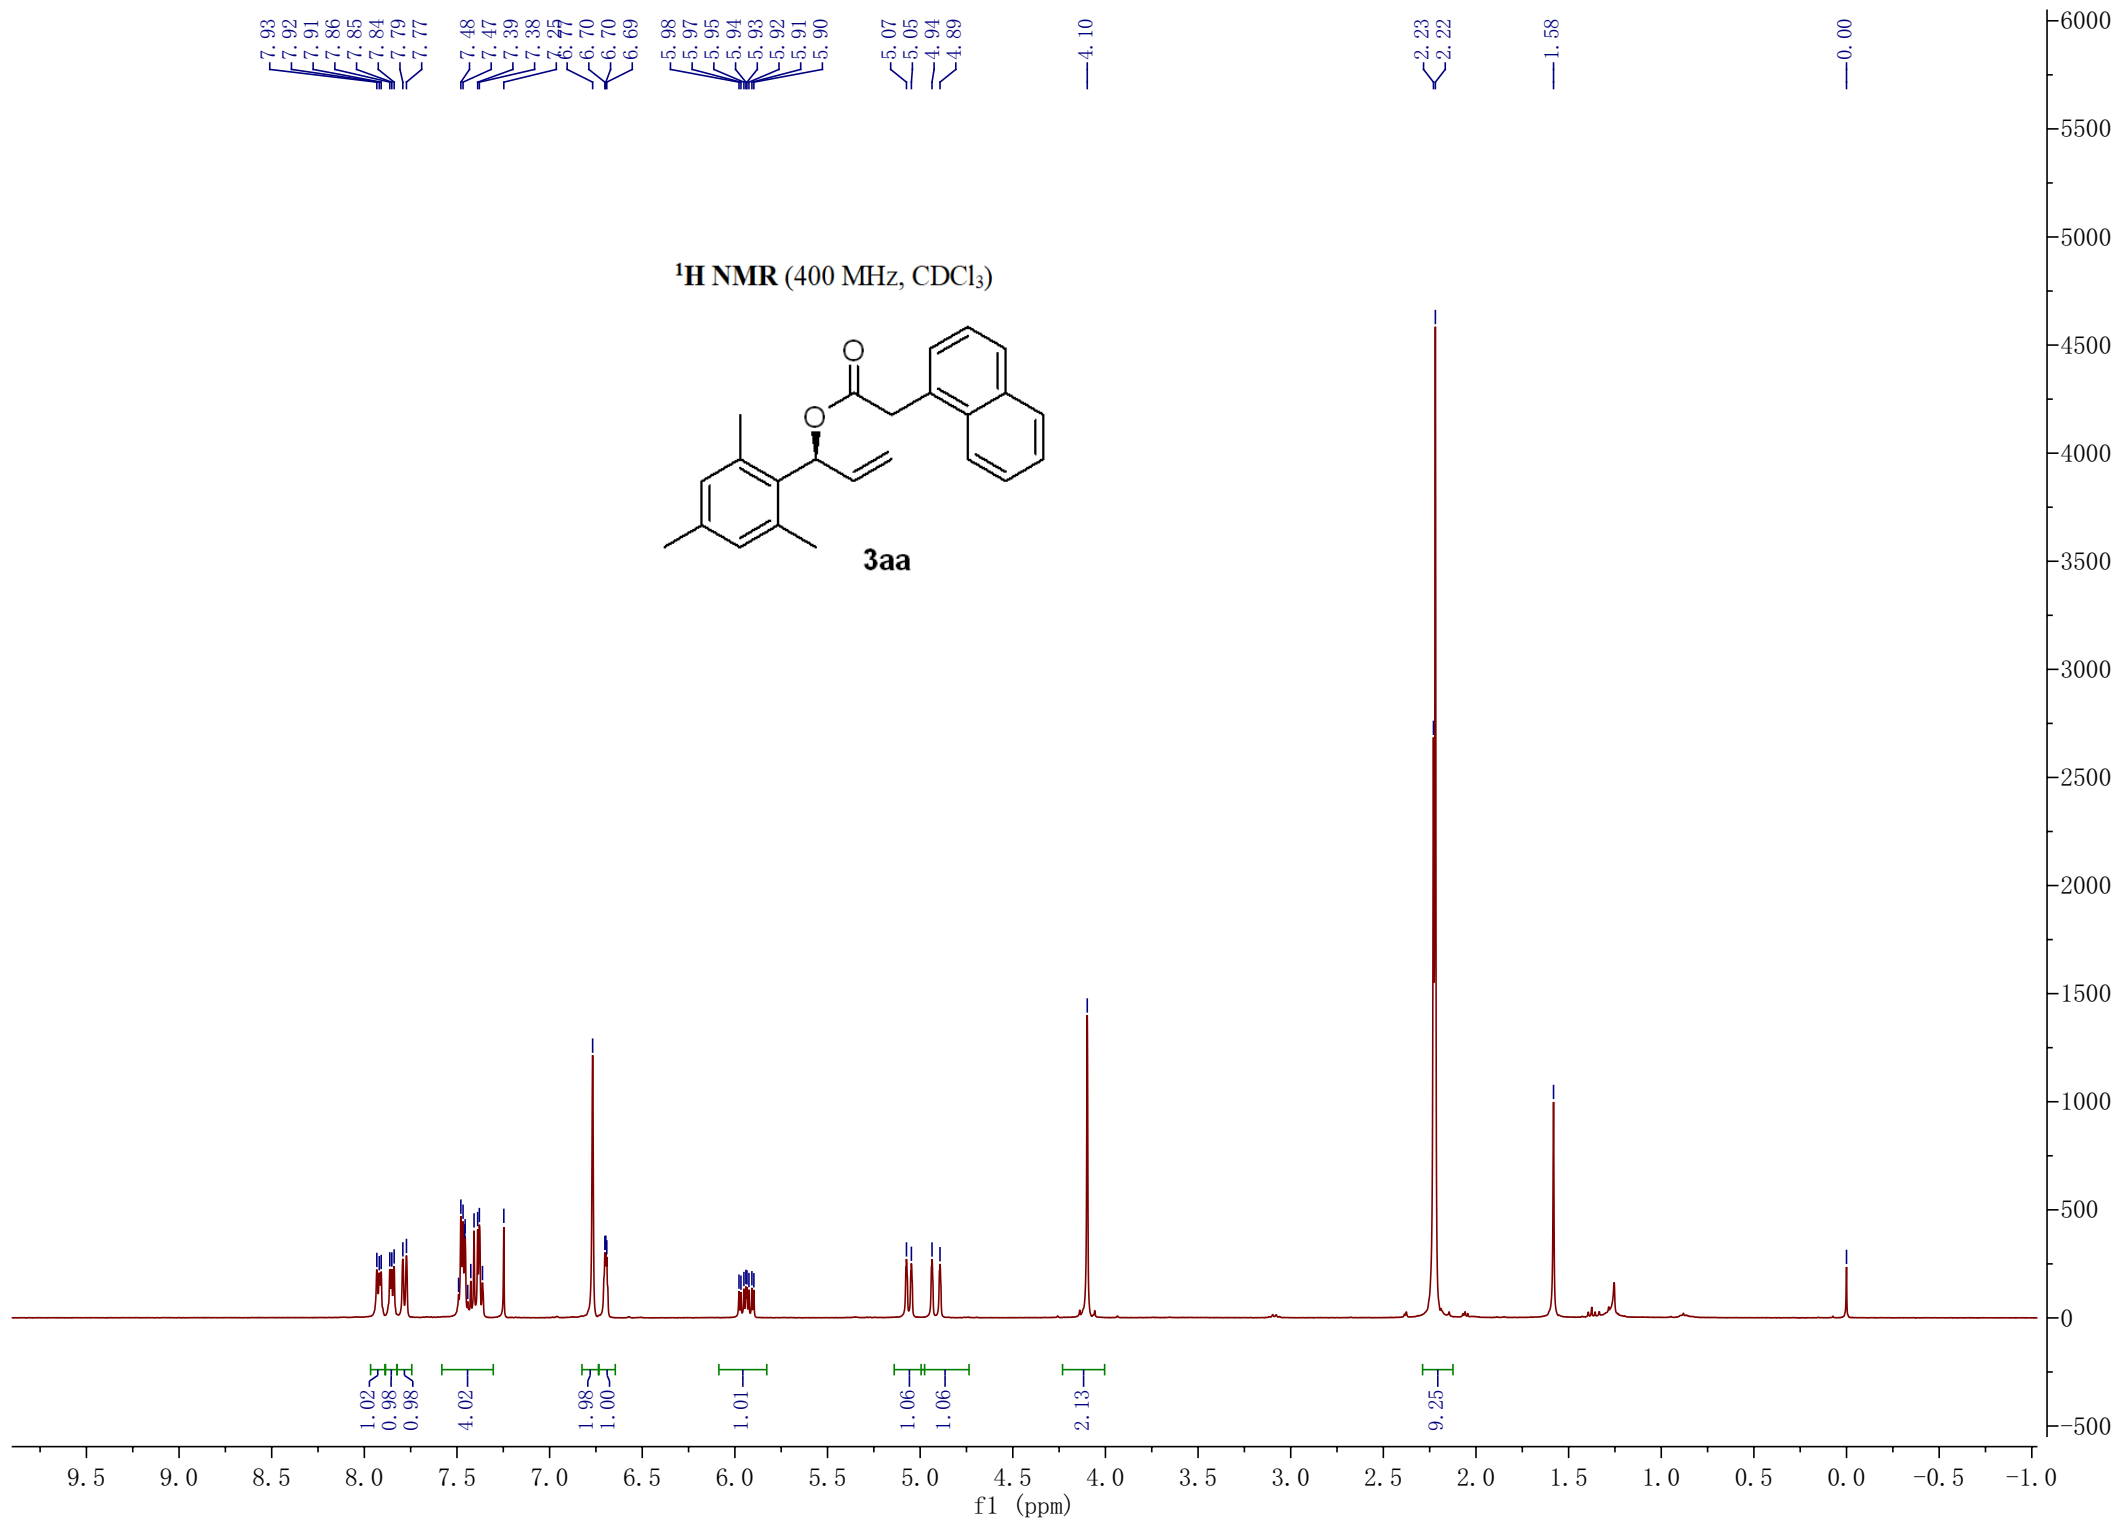

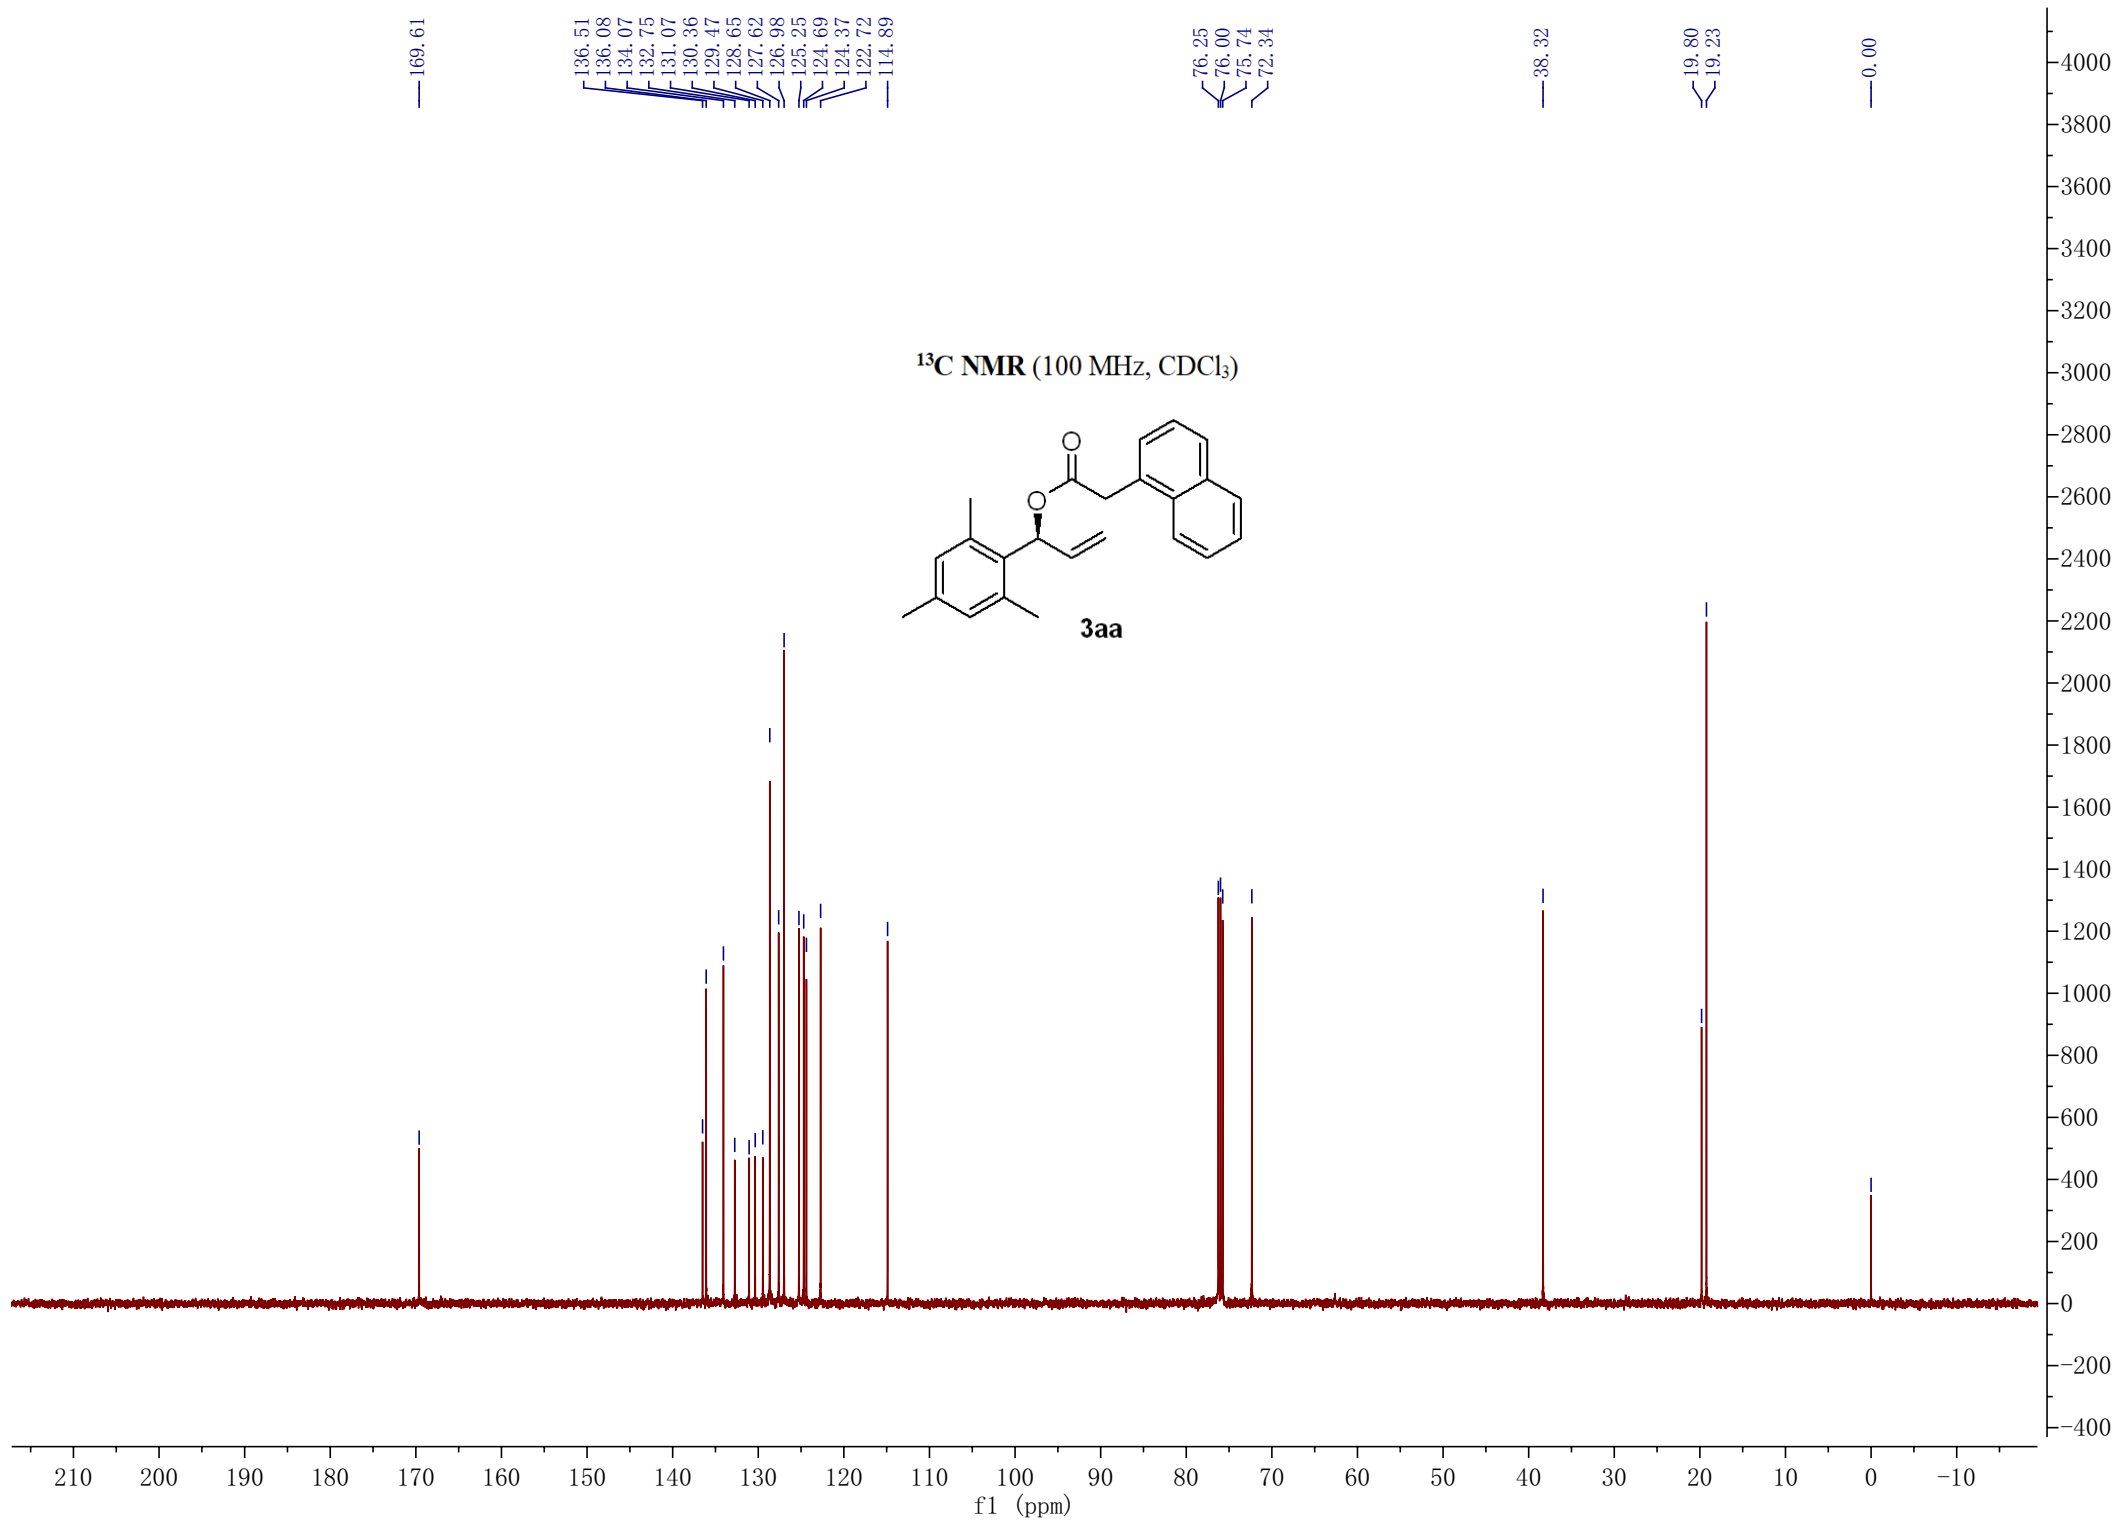

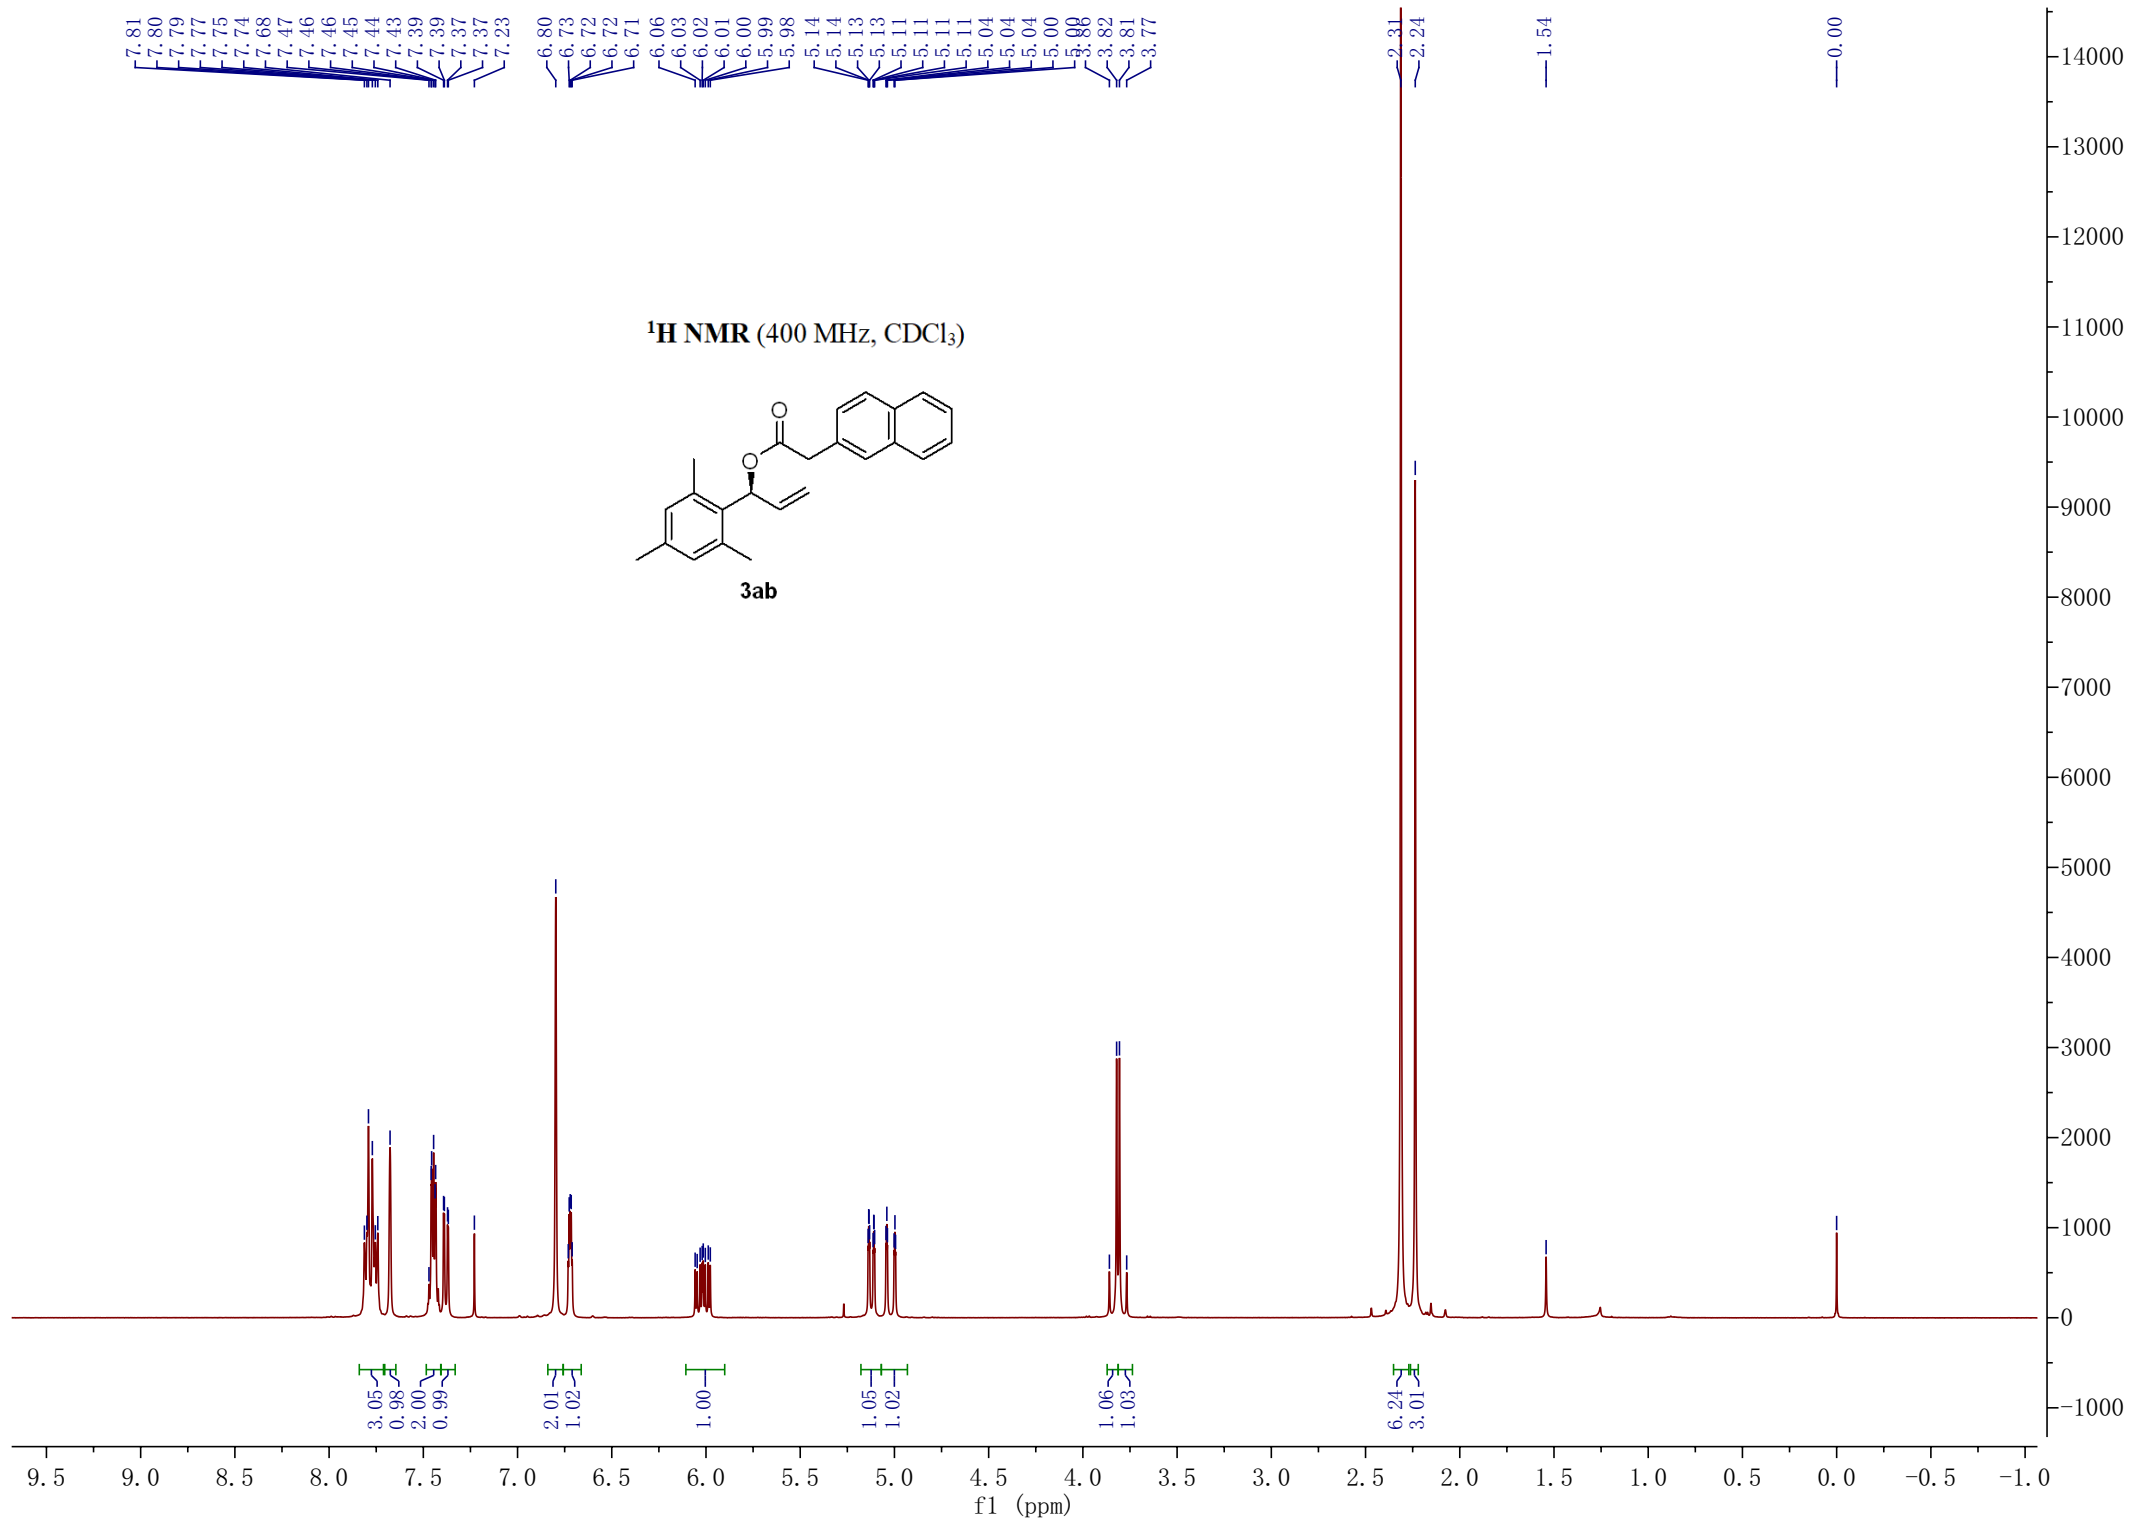

<sup>13</sup>C NMR (100 MHz, CDCl<sub>3</sub>)

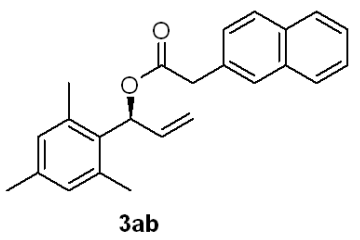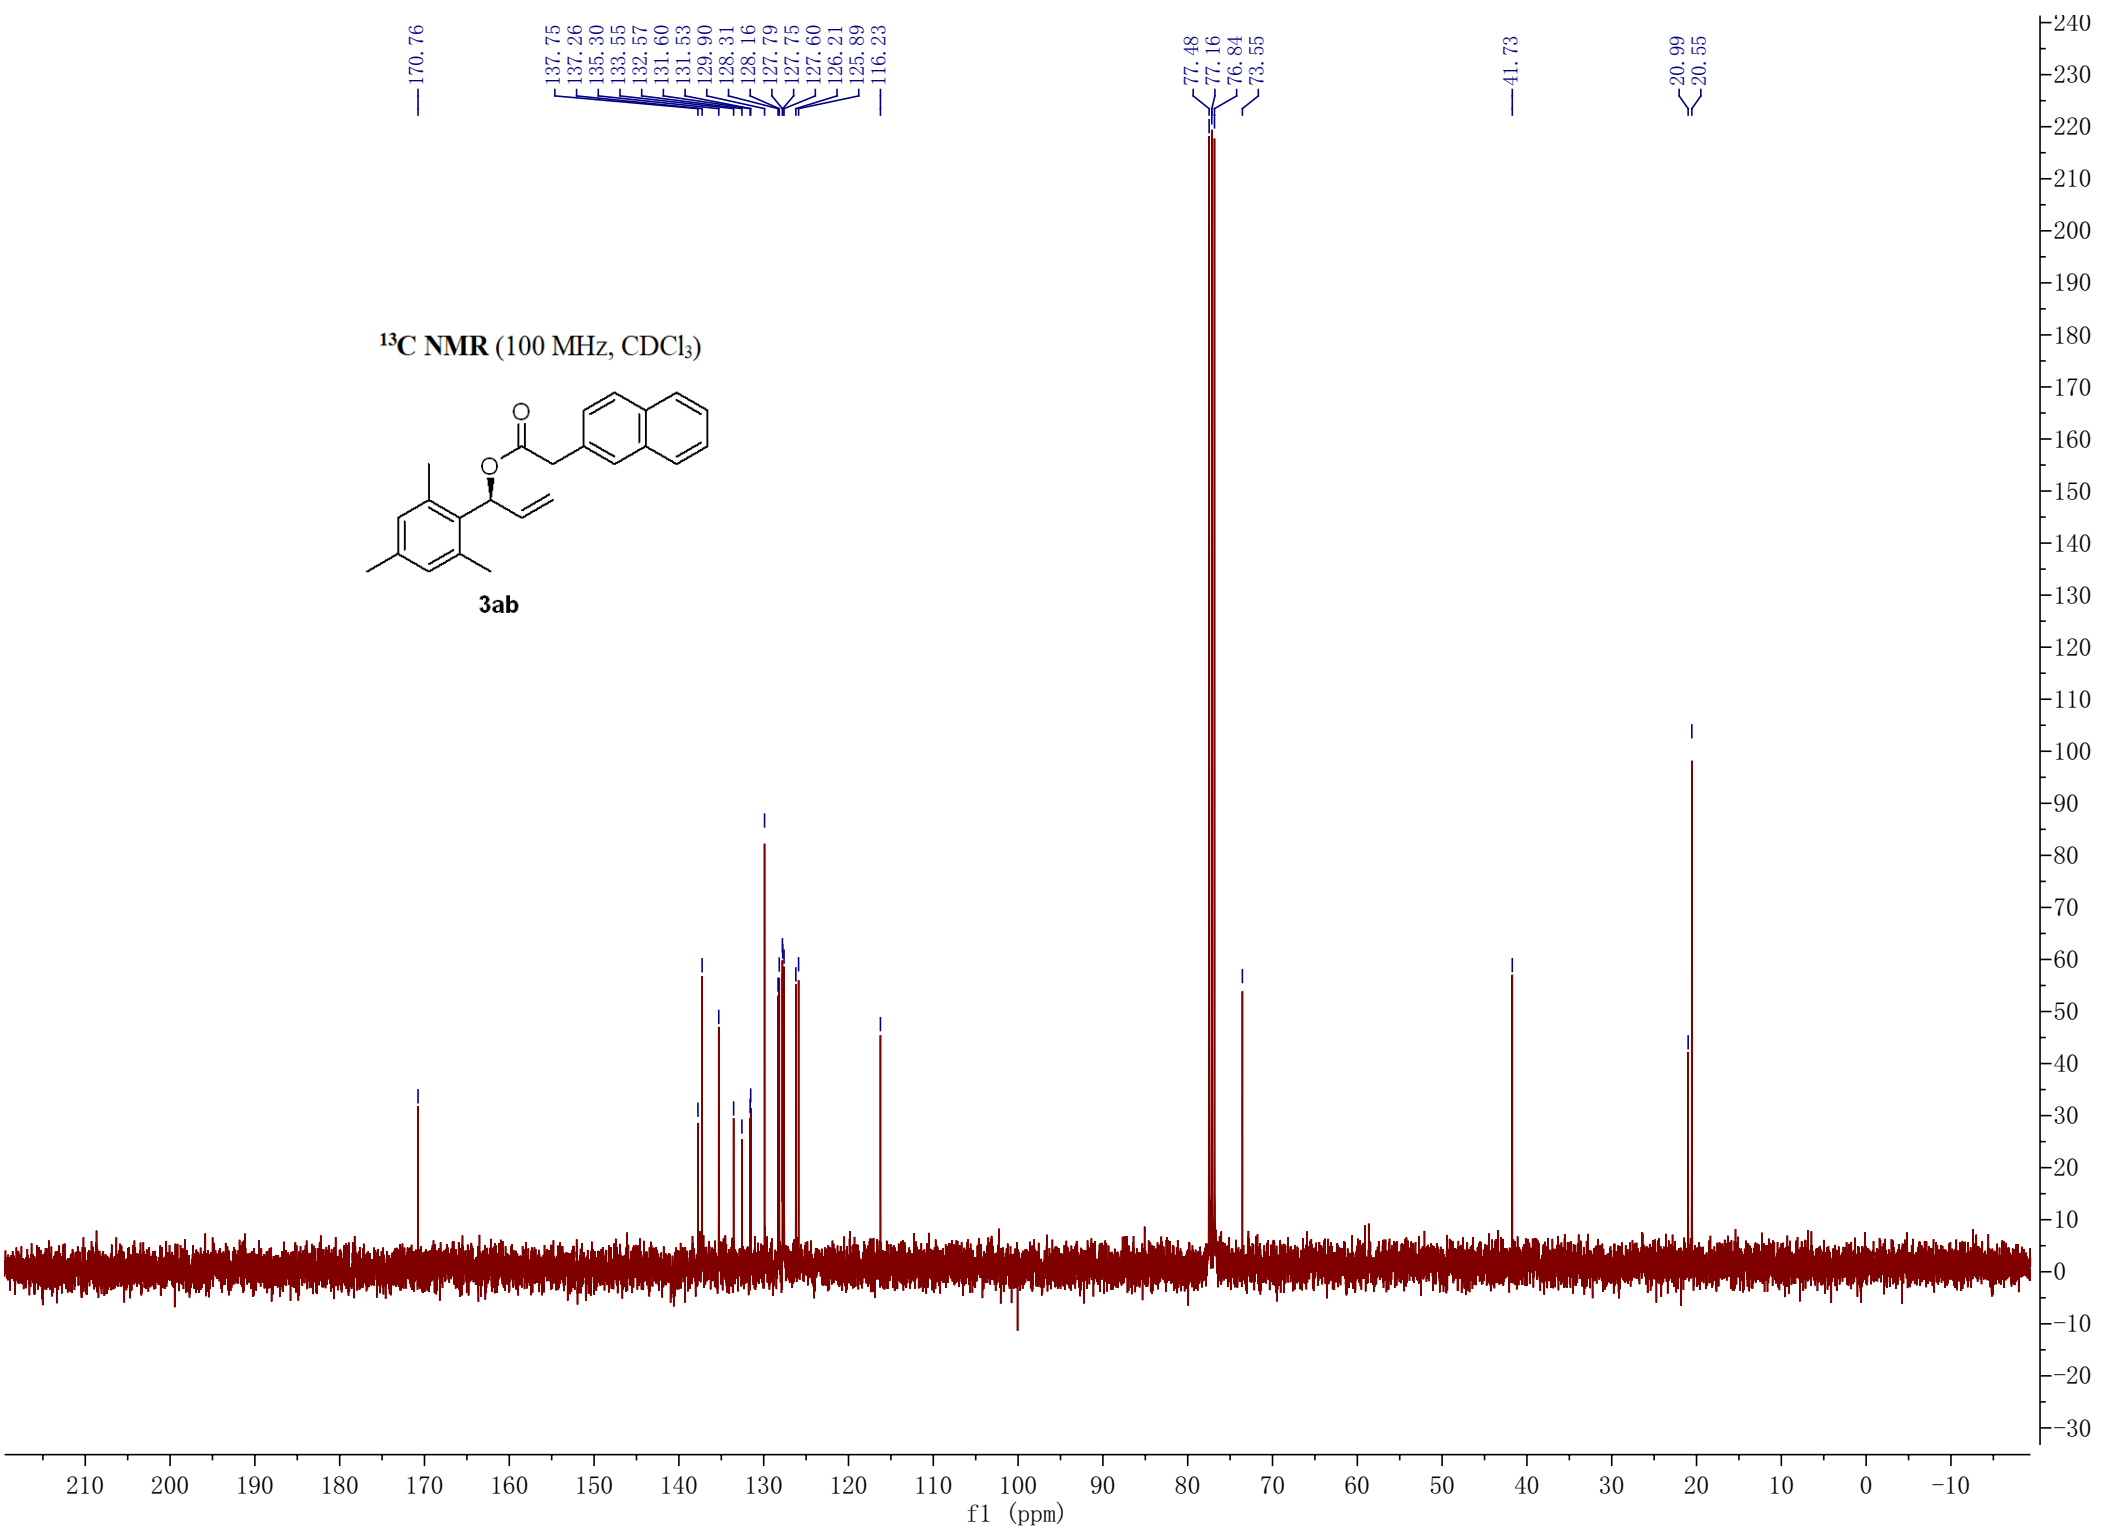

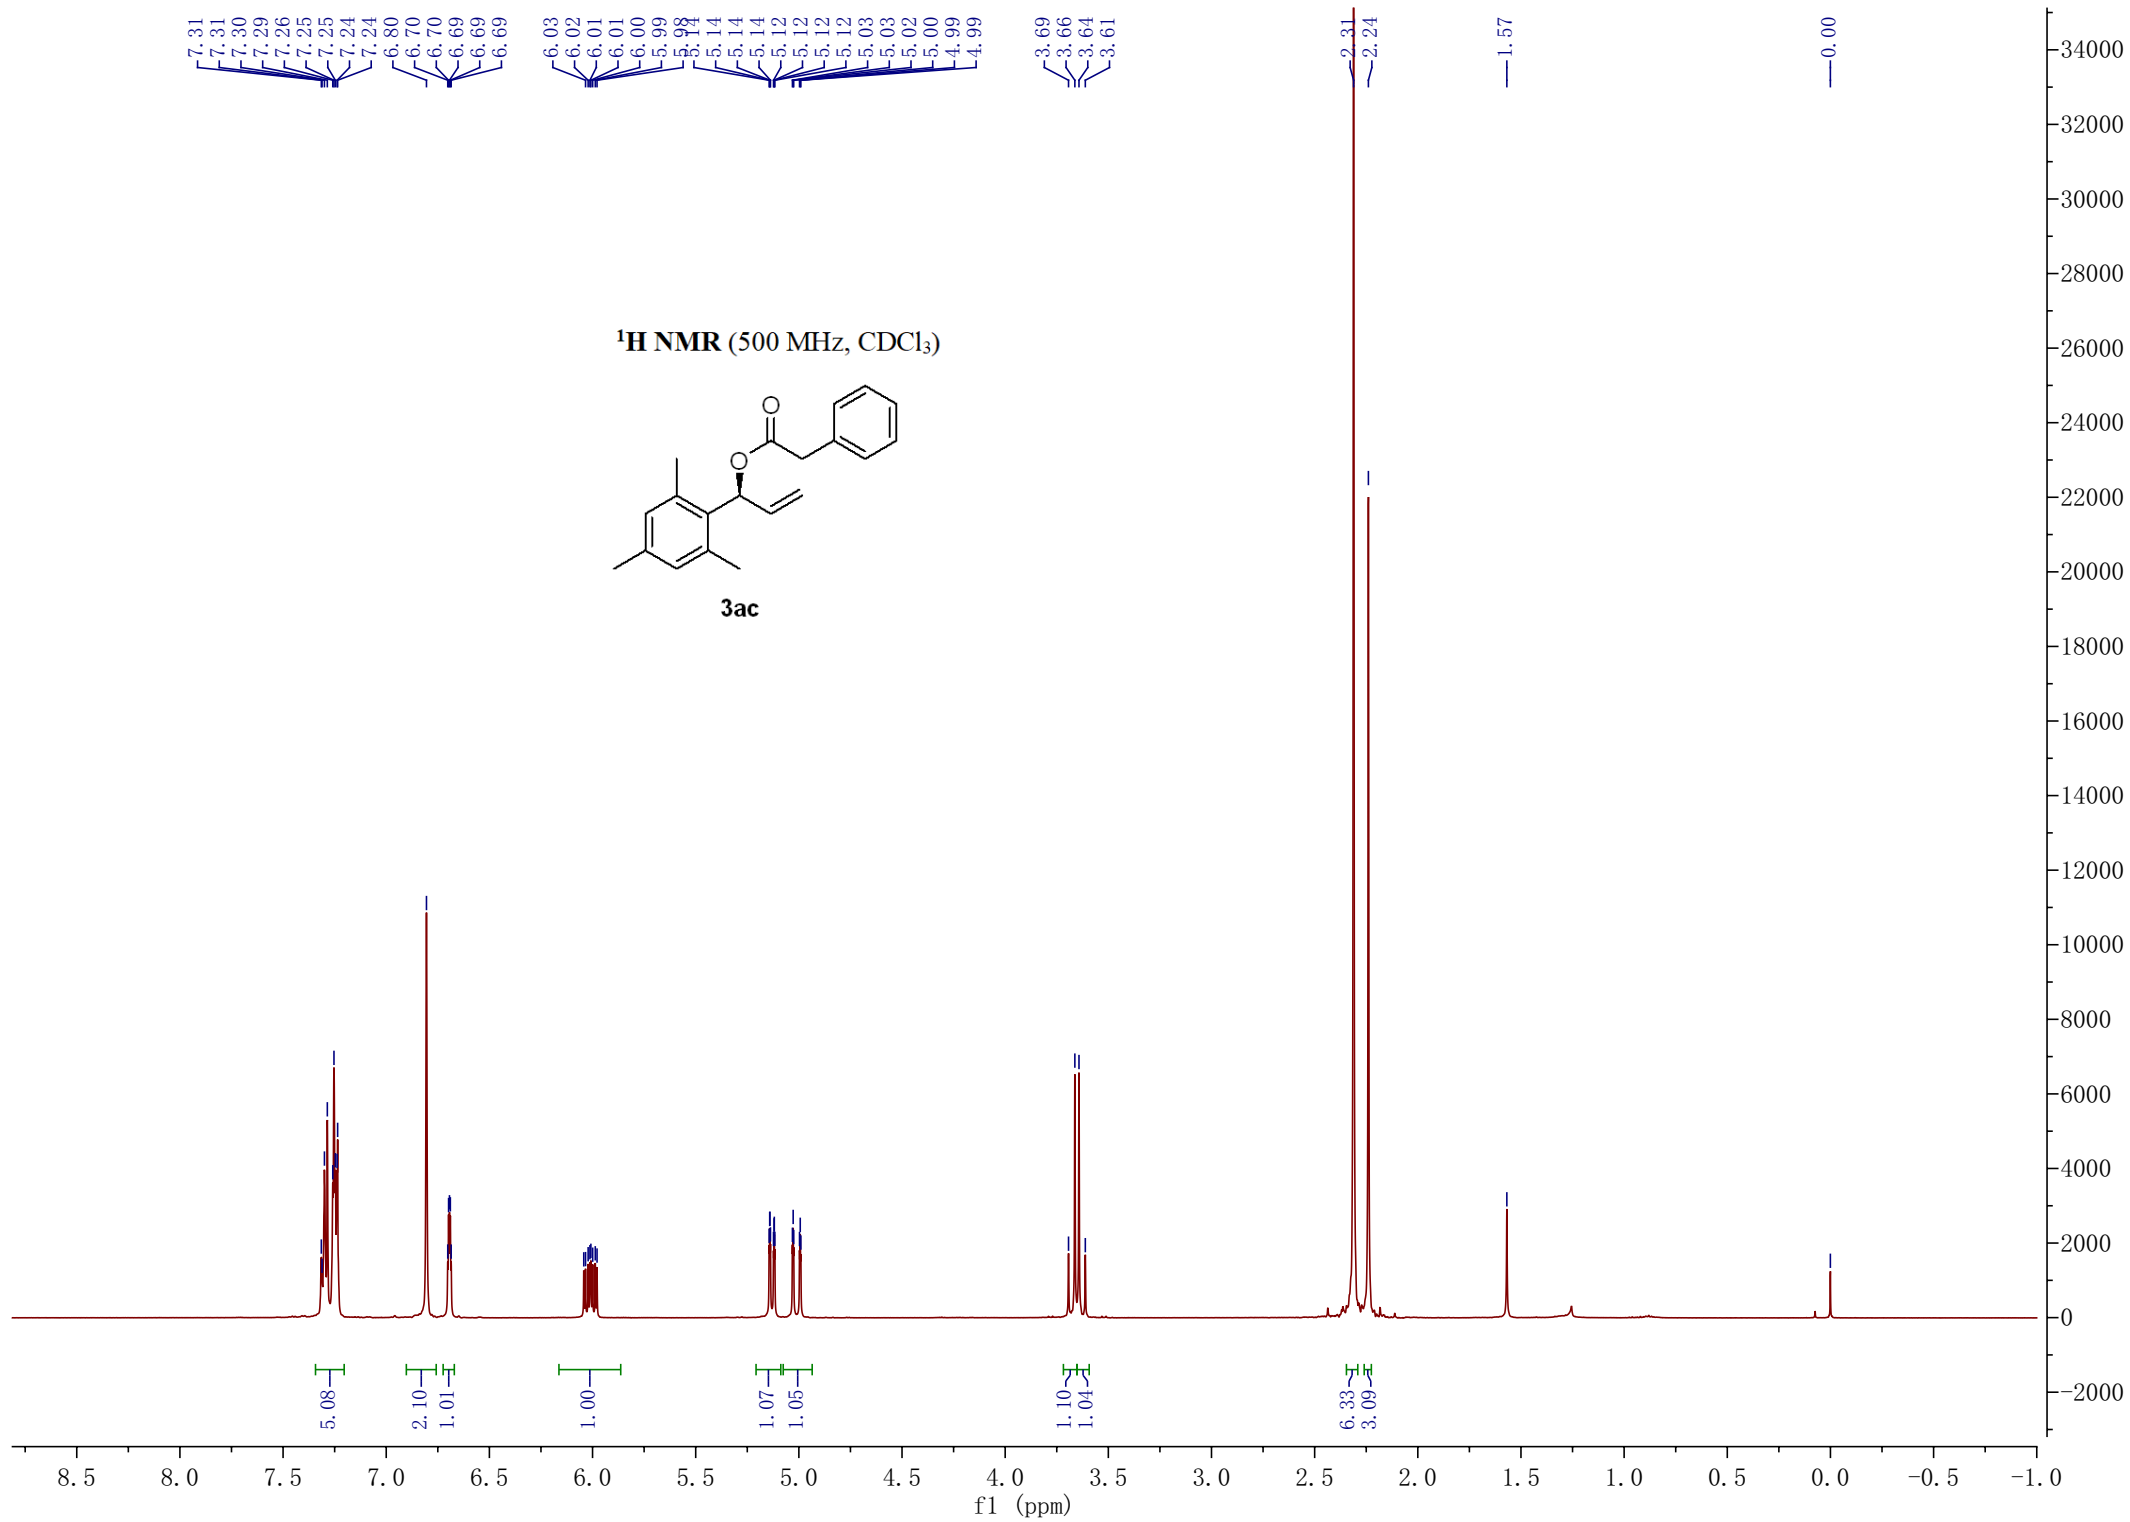

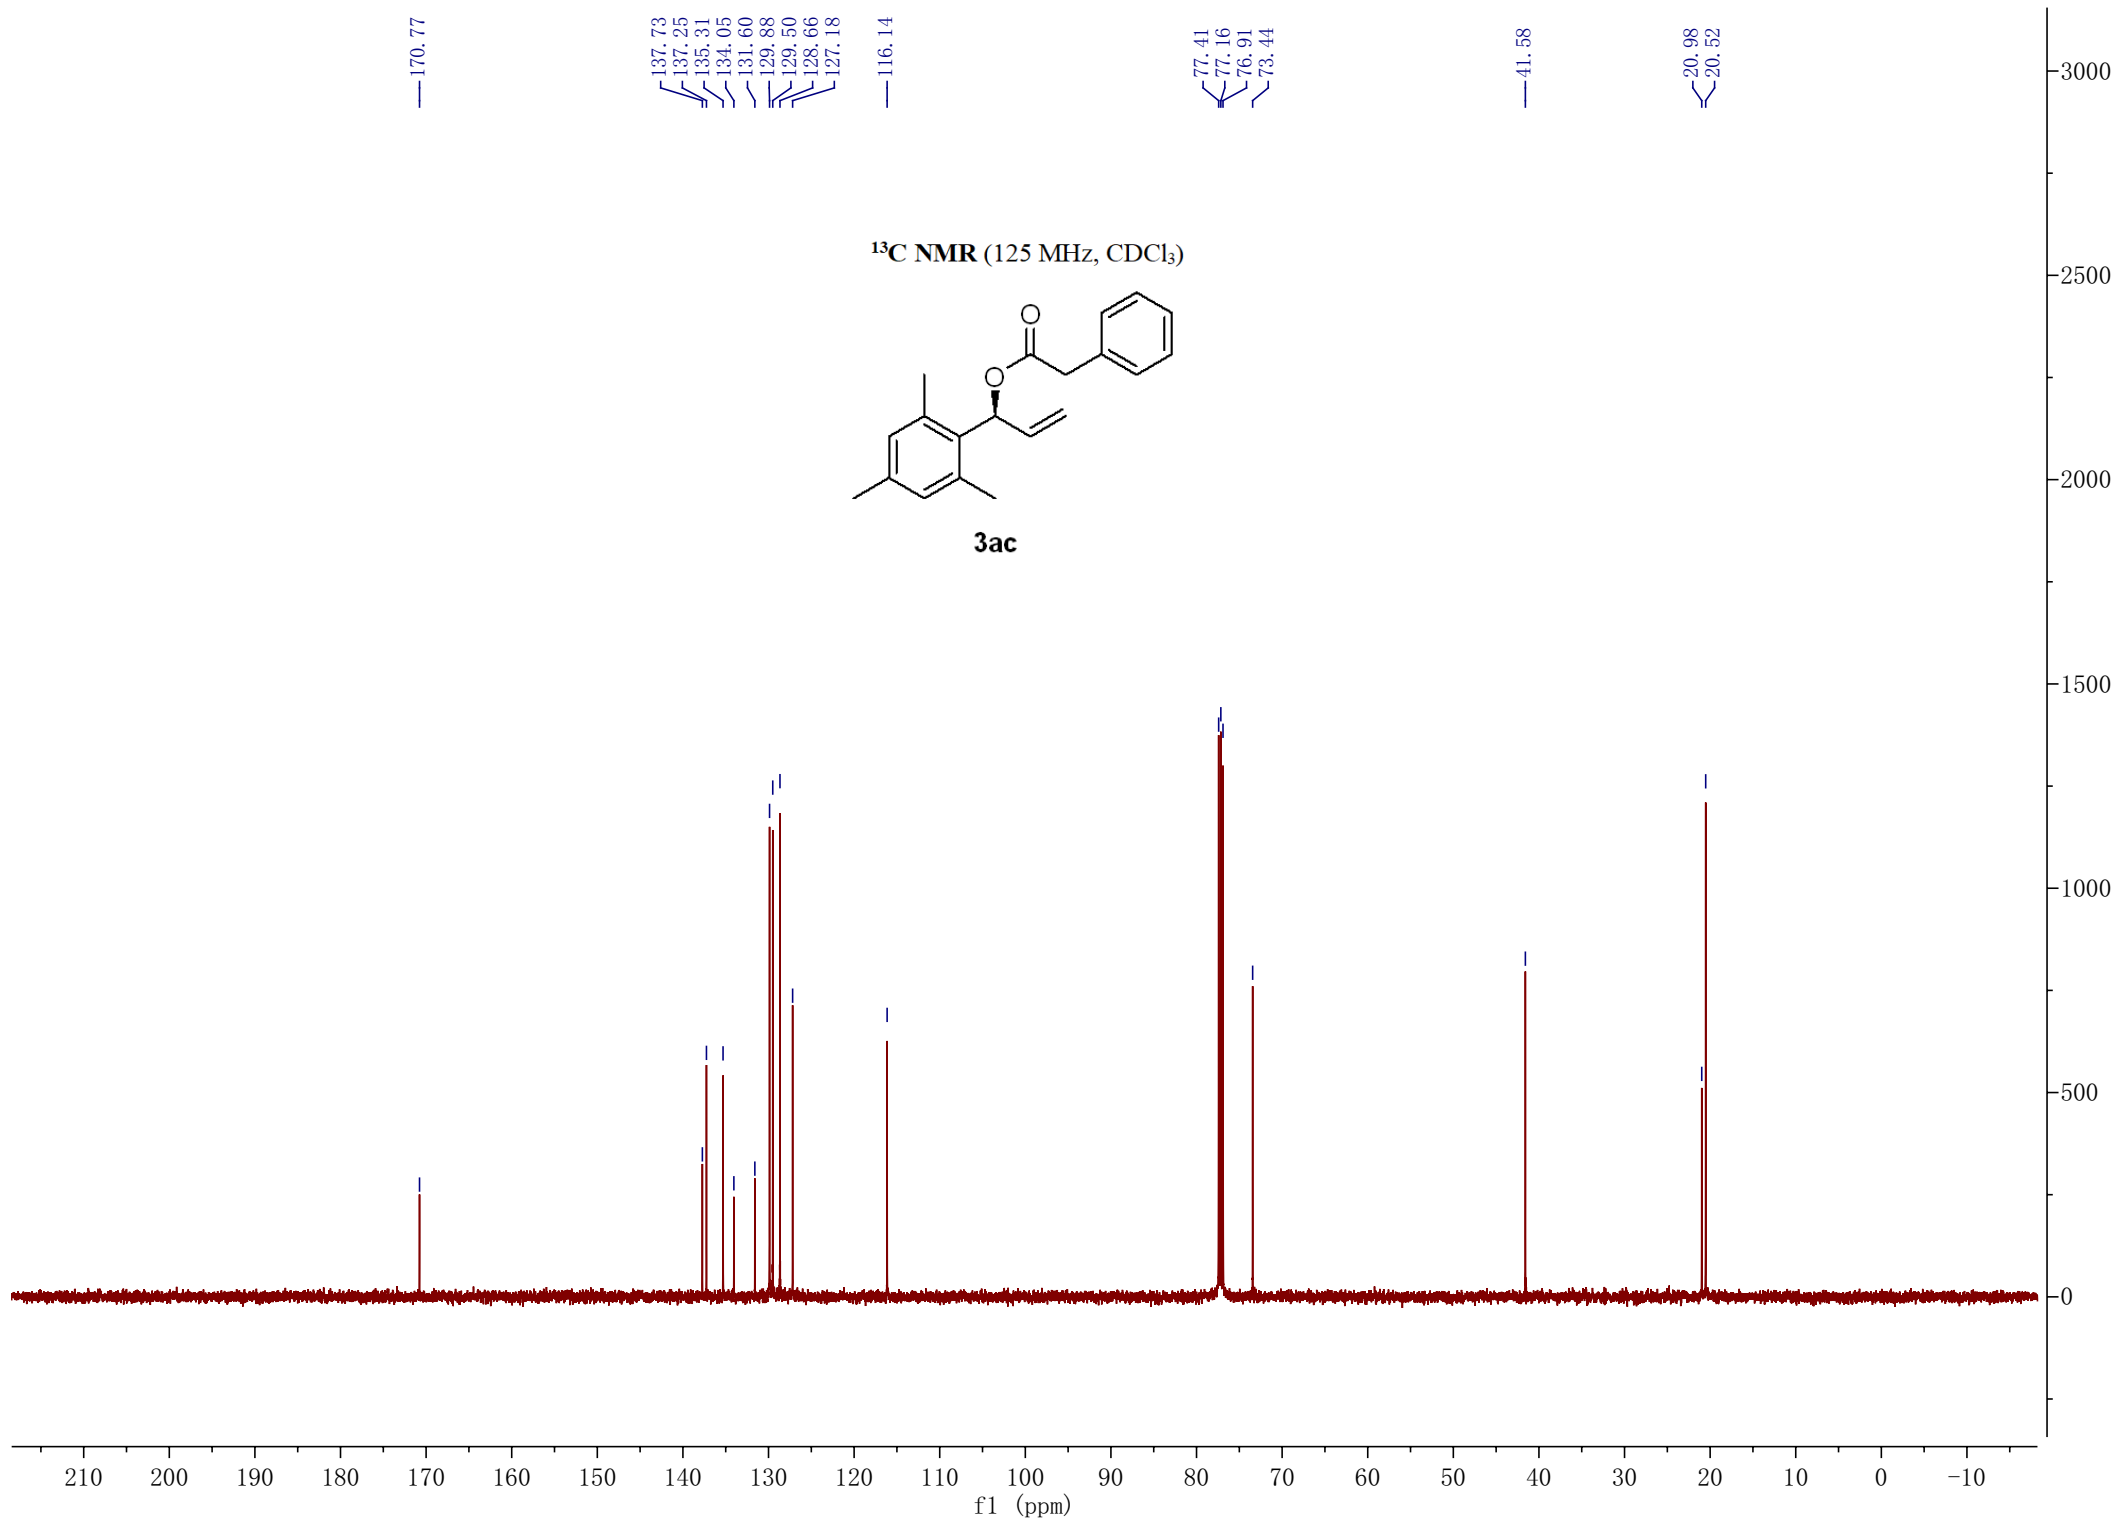

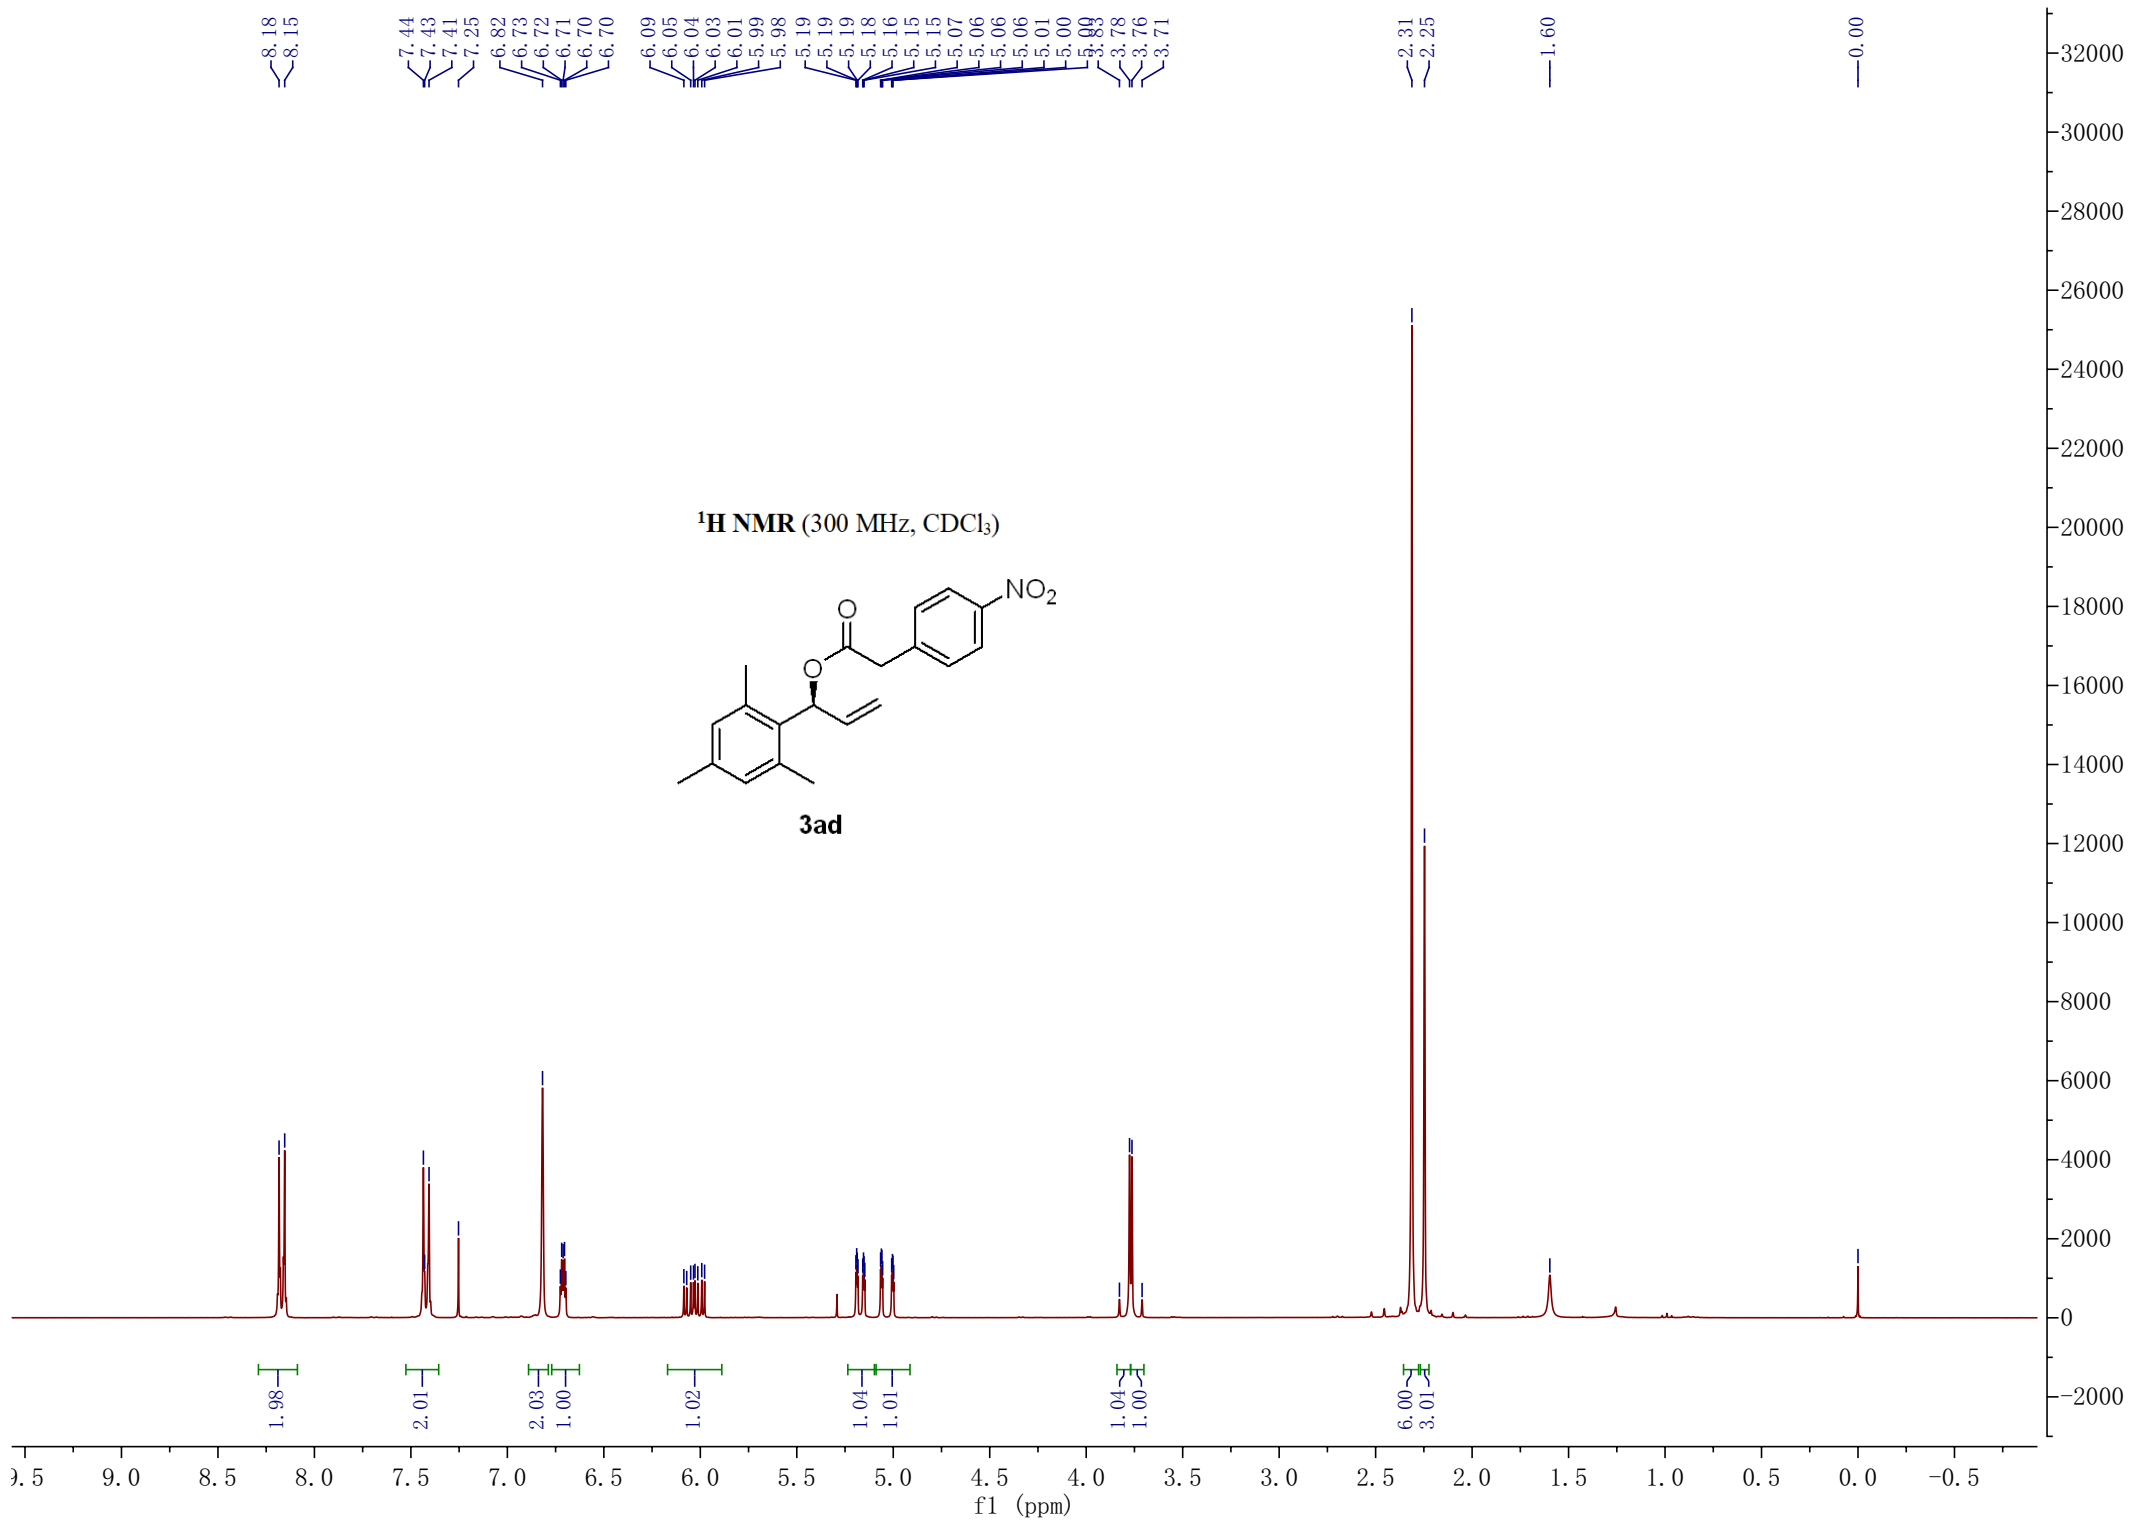



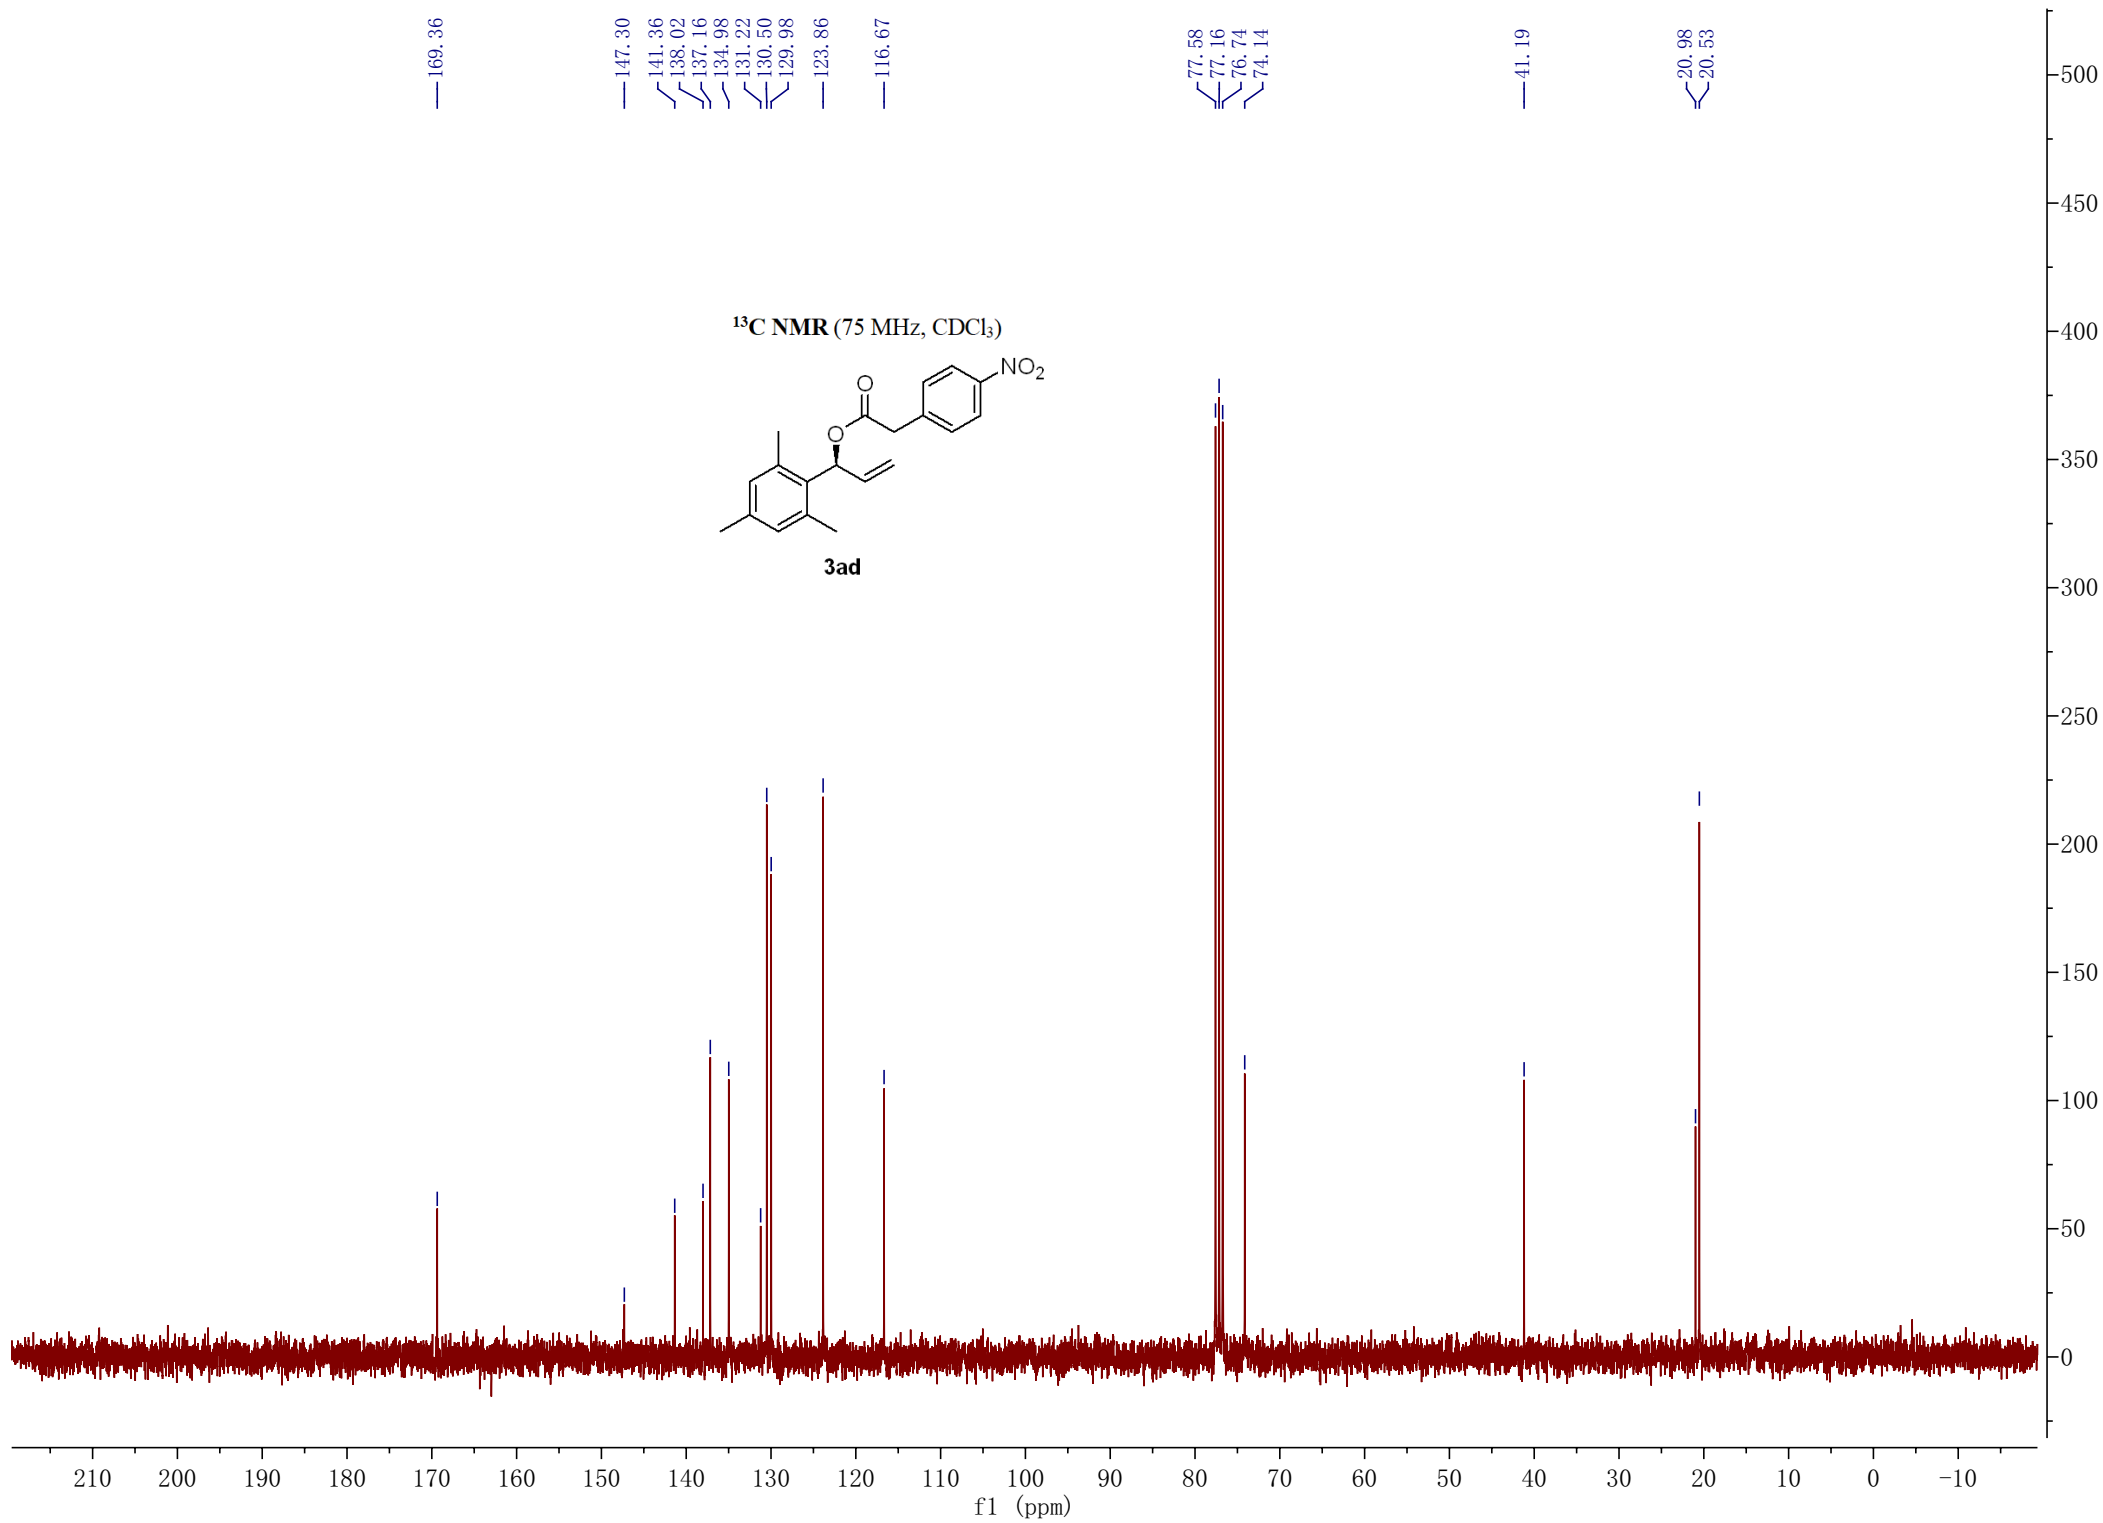

7.24  
7.18  
7.17  
7.15  
7.14  
6.85  
6.84  
6.82  
6.81  
6.68  
6.68  
6.05  
6.03  
6.02  
6.01  
6.00  
5.98  
5.97  
5.15  
5.14  
5.14  
5.12  
5.12  
5.12  
5.11  
5.04  
5.04  
5.03  
5.00  
4.99  
4.99  
4.99  
3.78  
3.64  
3.60  
3.58  
3.54  
2.32  
2.24  
0.00

<sup>1</sup>H NMR (400 MHz, CDCl<sub>3</sub>)

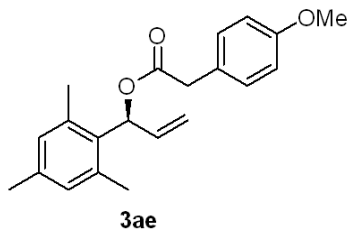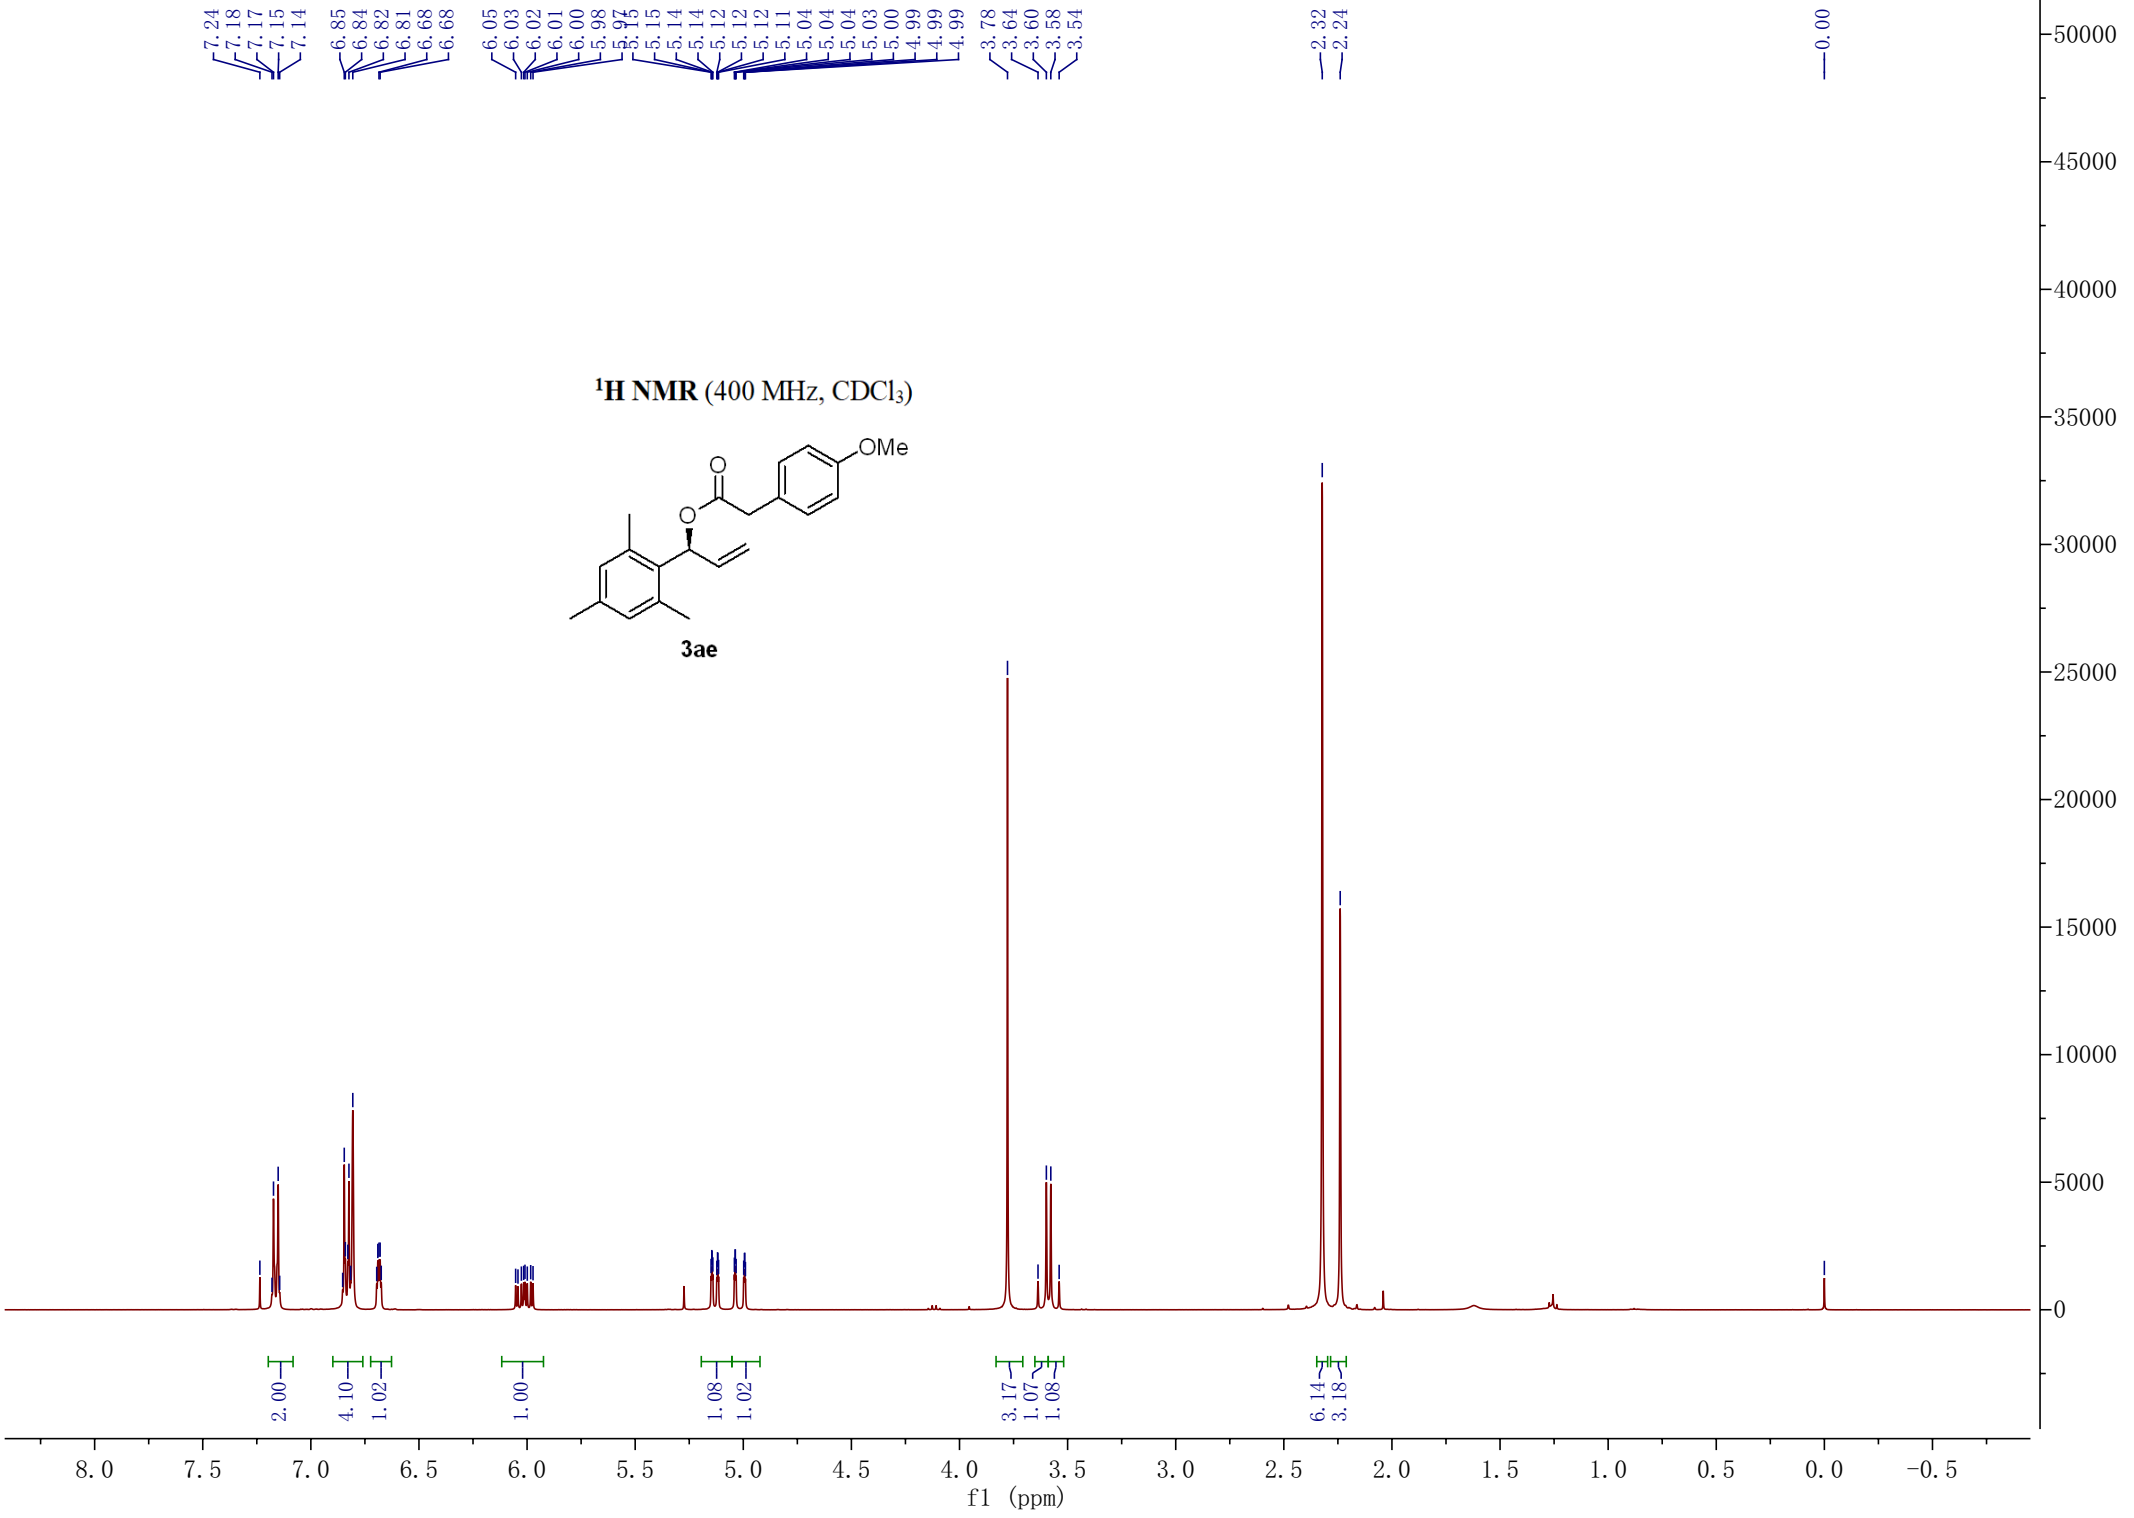

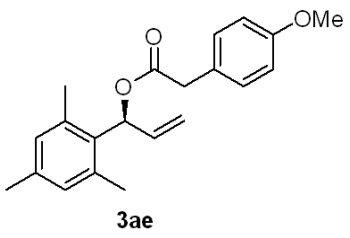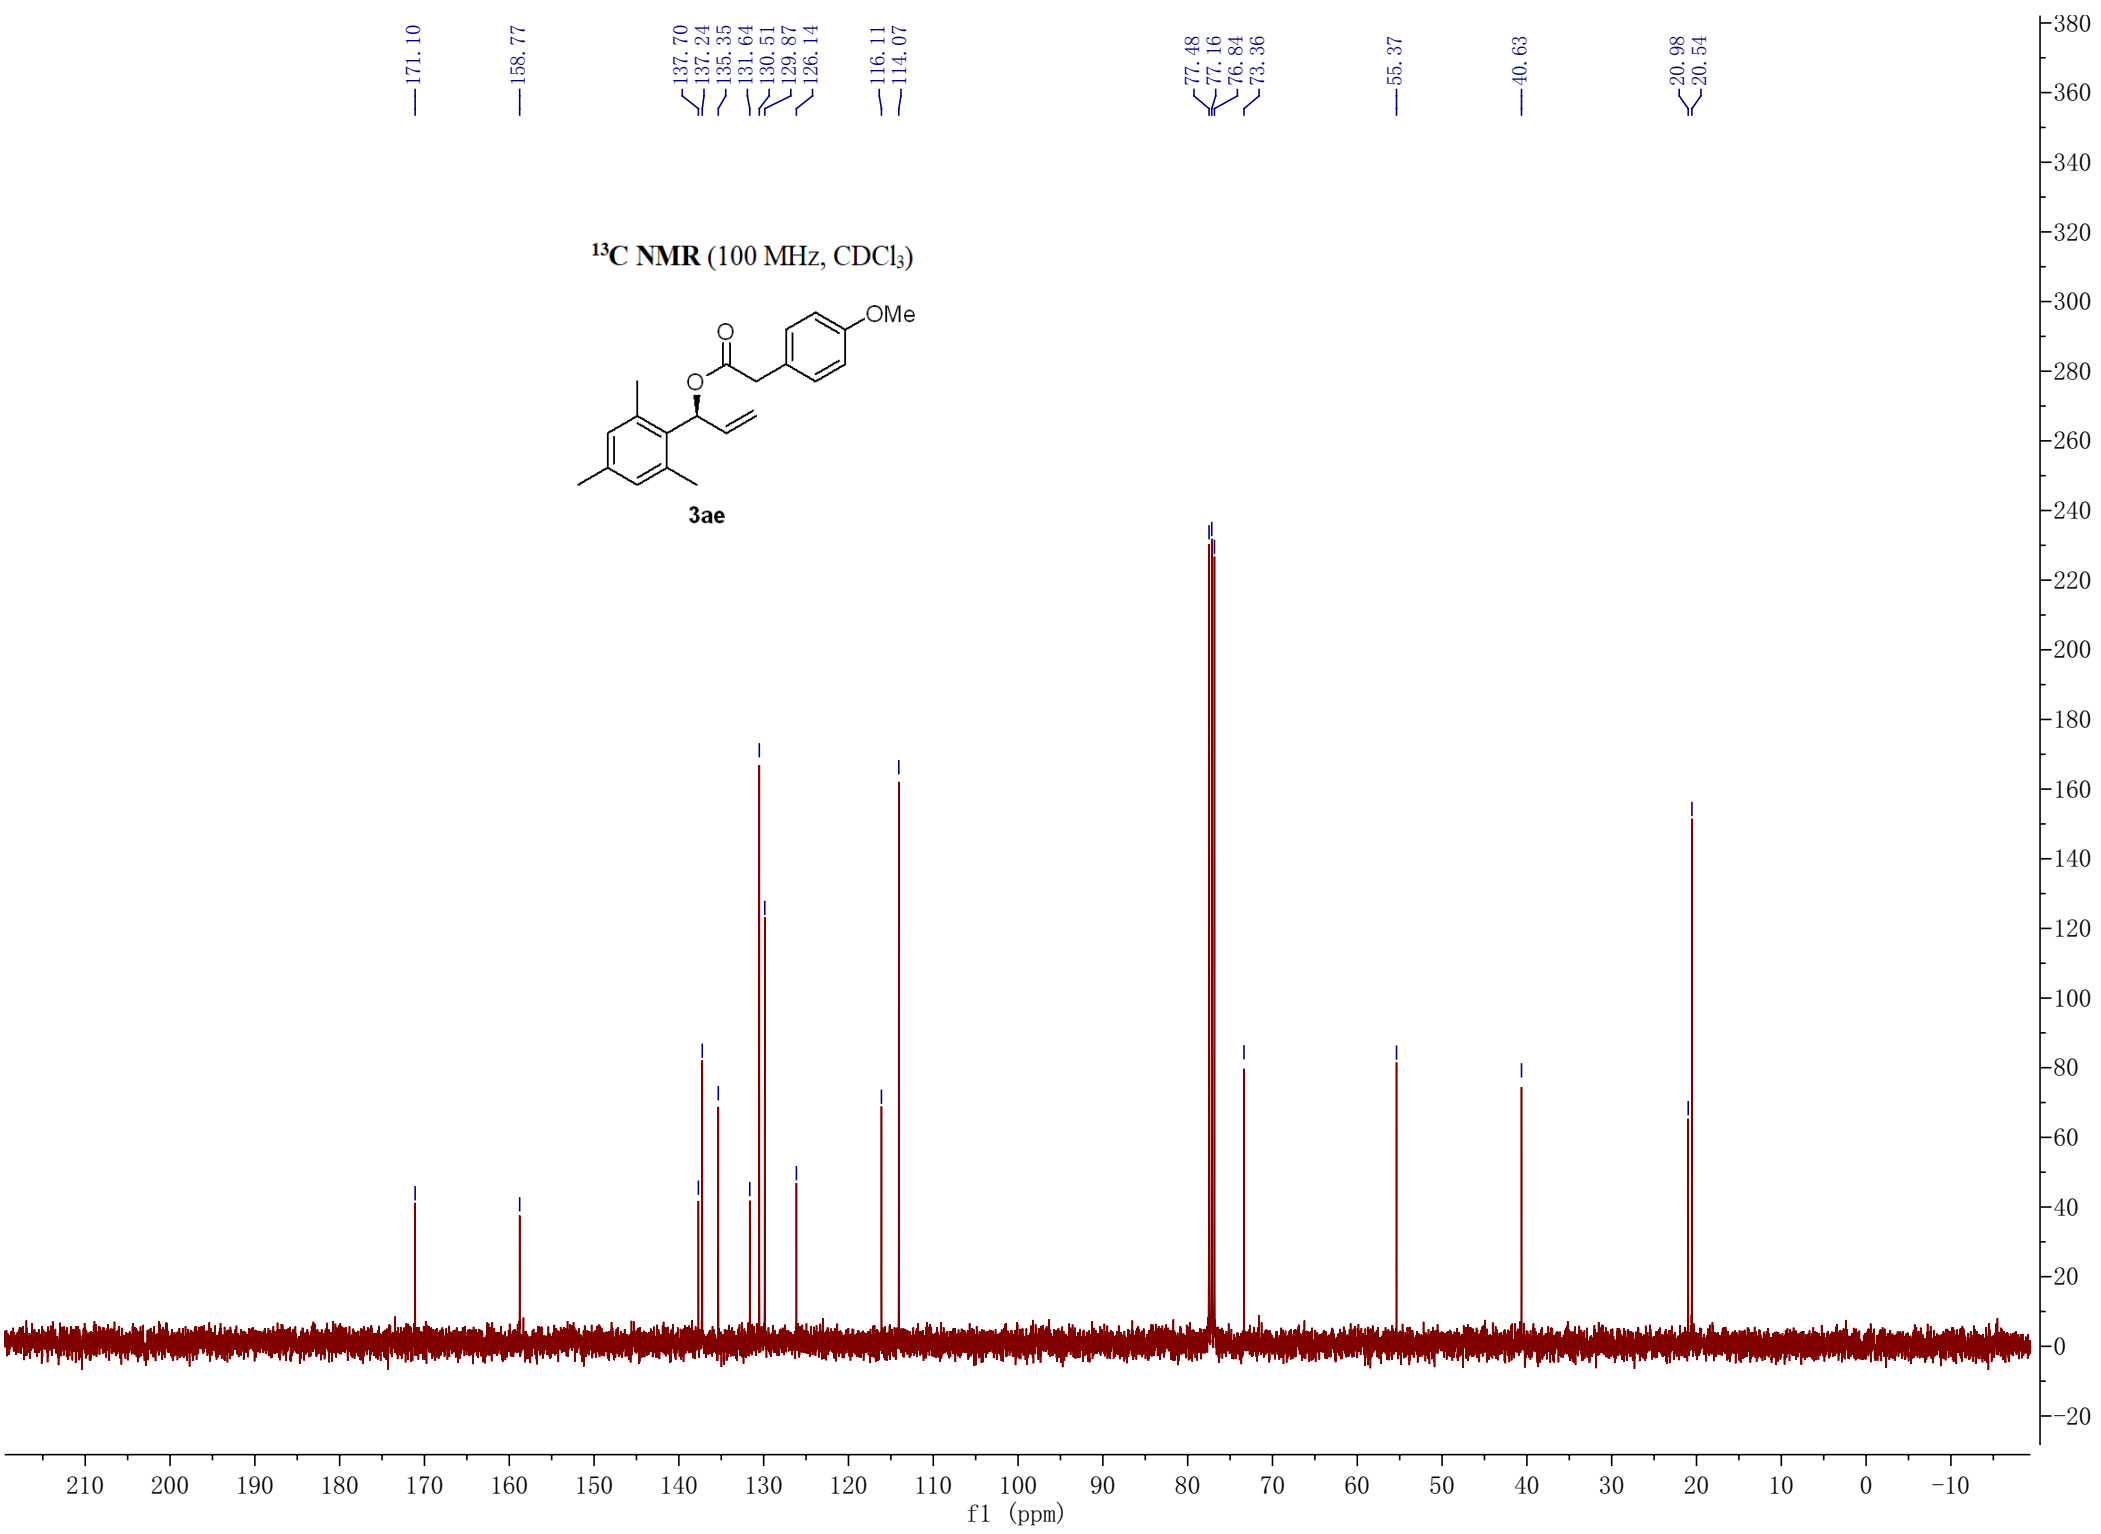

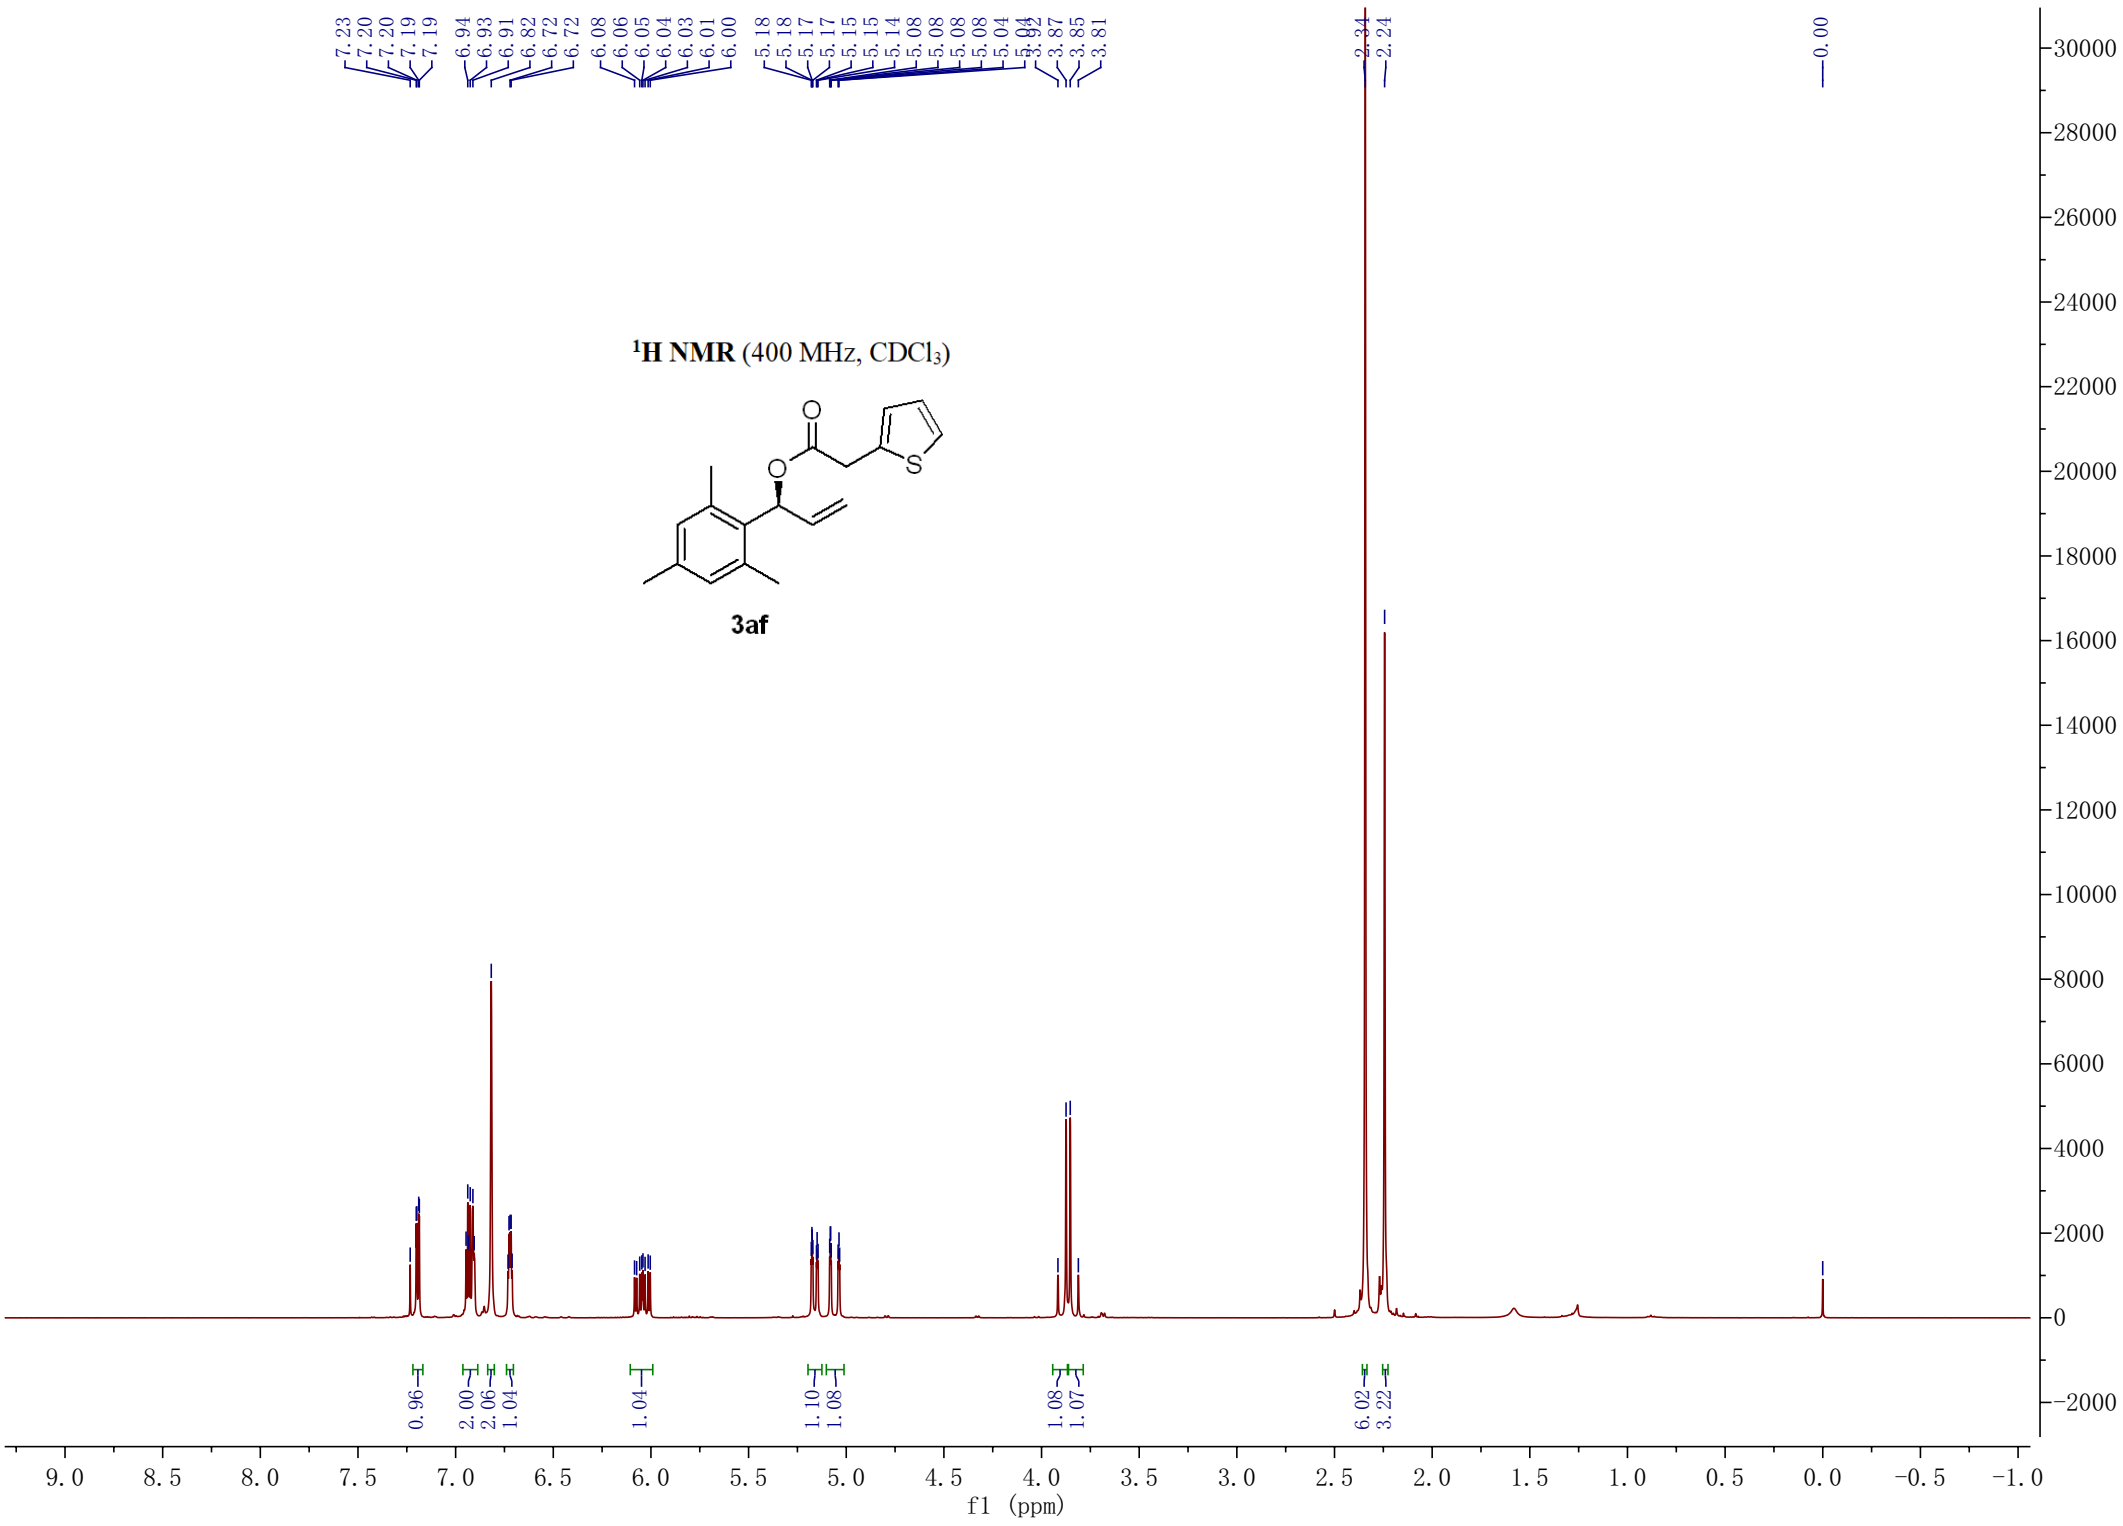

169.64

137.82  
137.28  
135.18  
135.03  
131.44  
129.91  
127.07  
126.92  
125.15  
116.36

77.58  
77.16  
76.74  
73.82

35.59

20.98  
20.55

<sup>13</sup>C NMR (100 MHz, CDCl<sub>3</sub>)

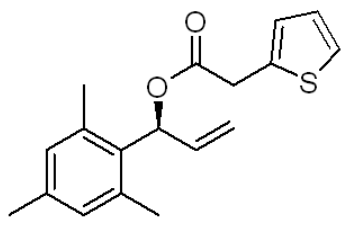

**3af**

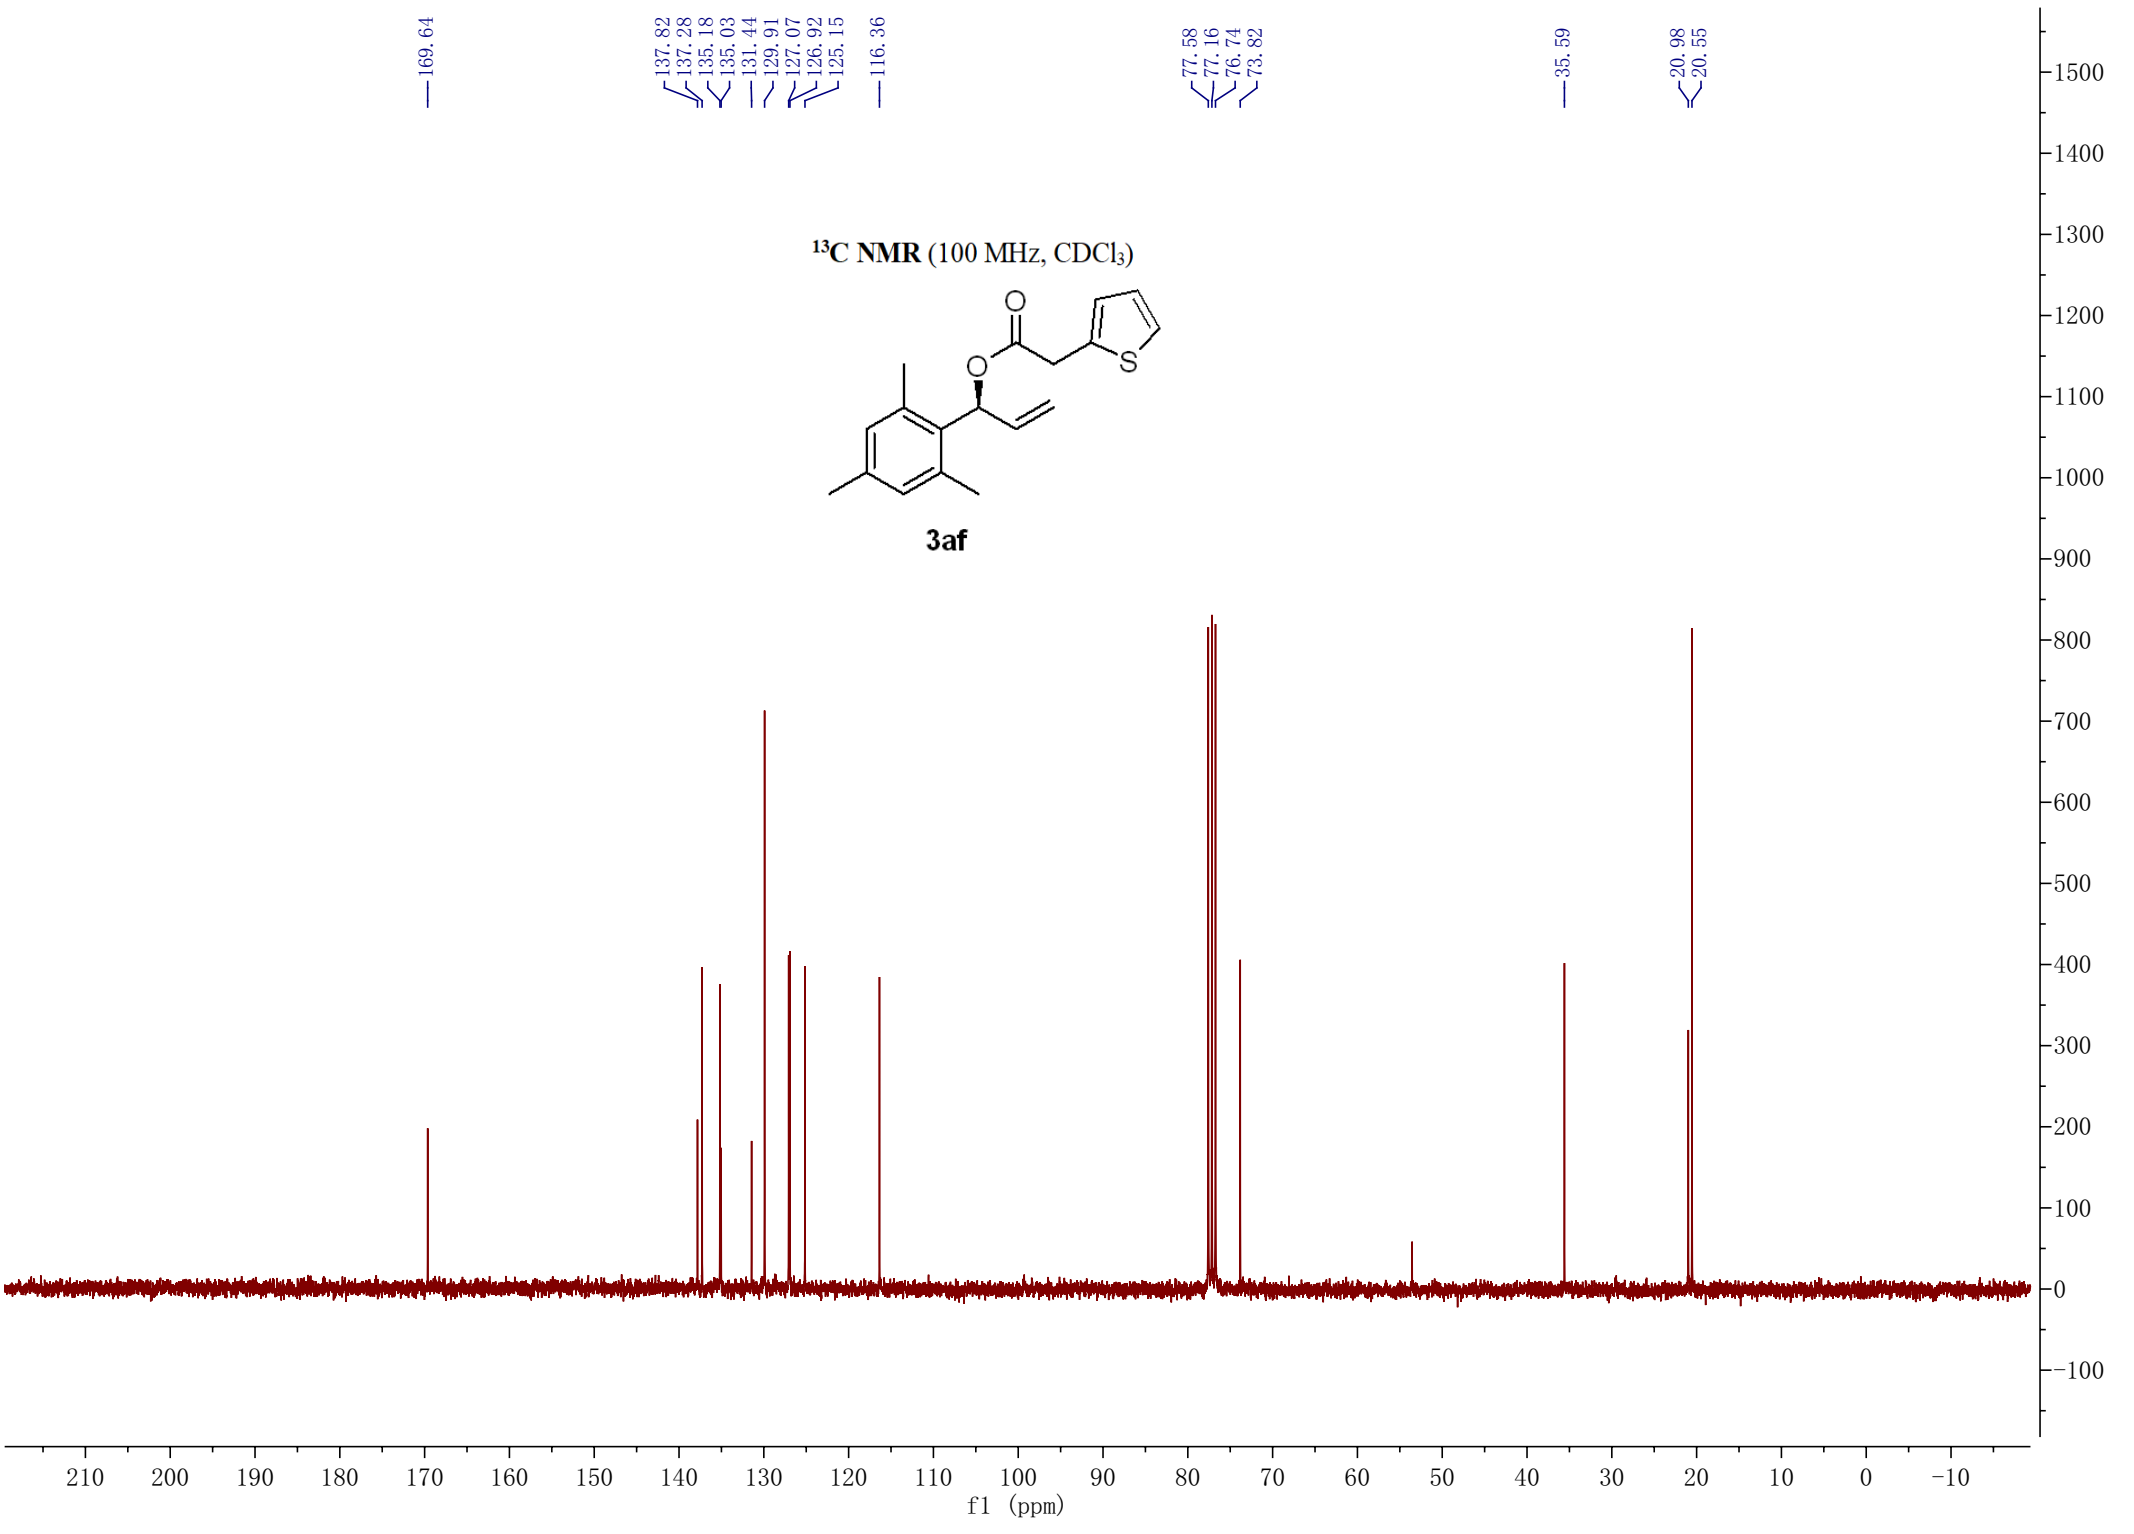

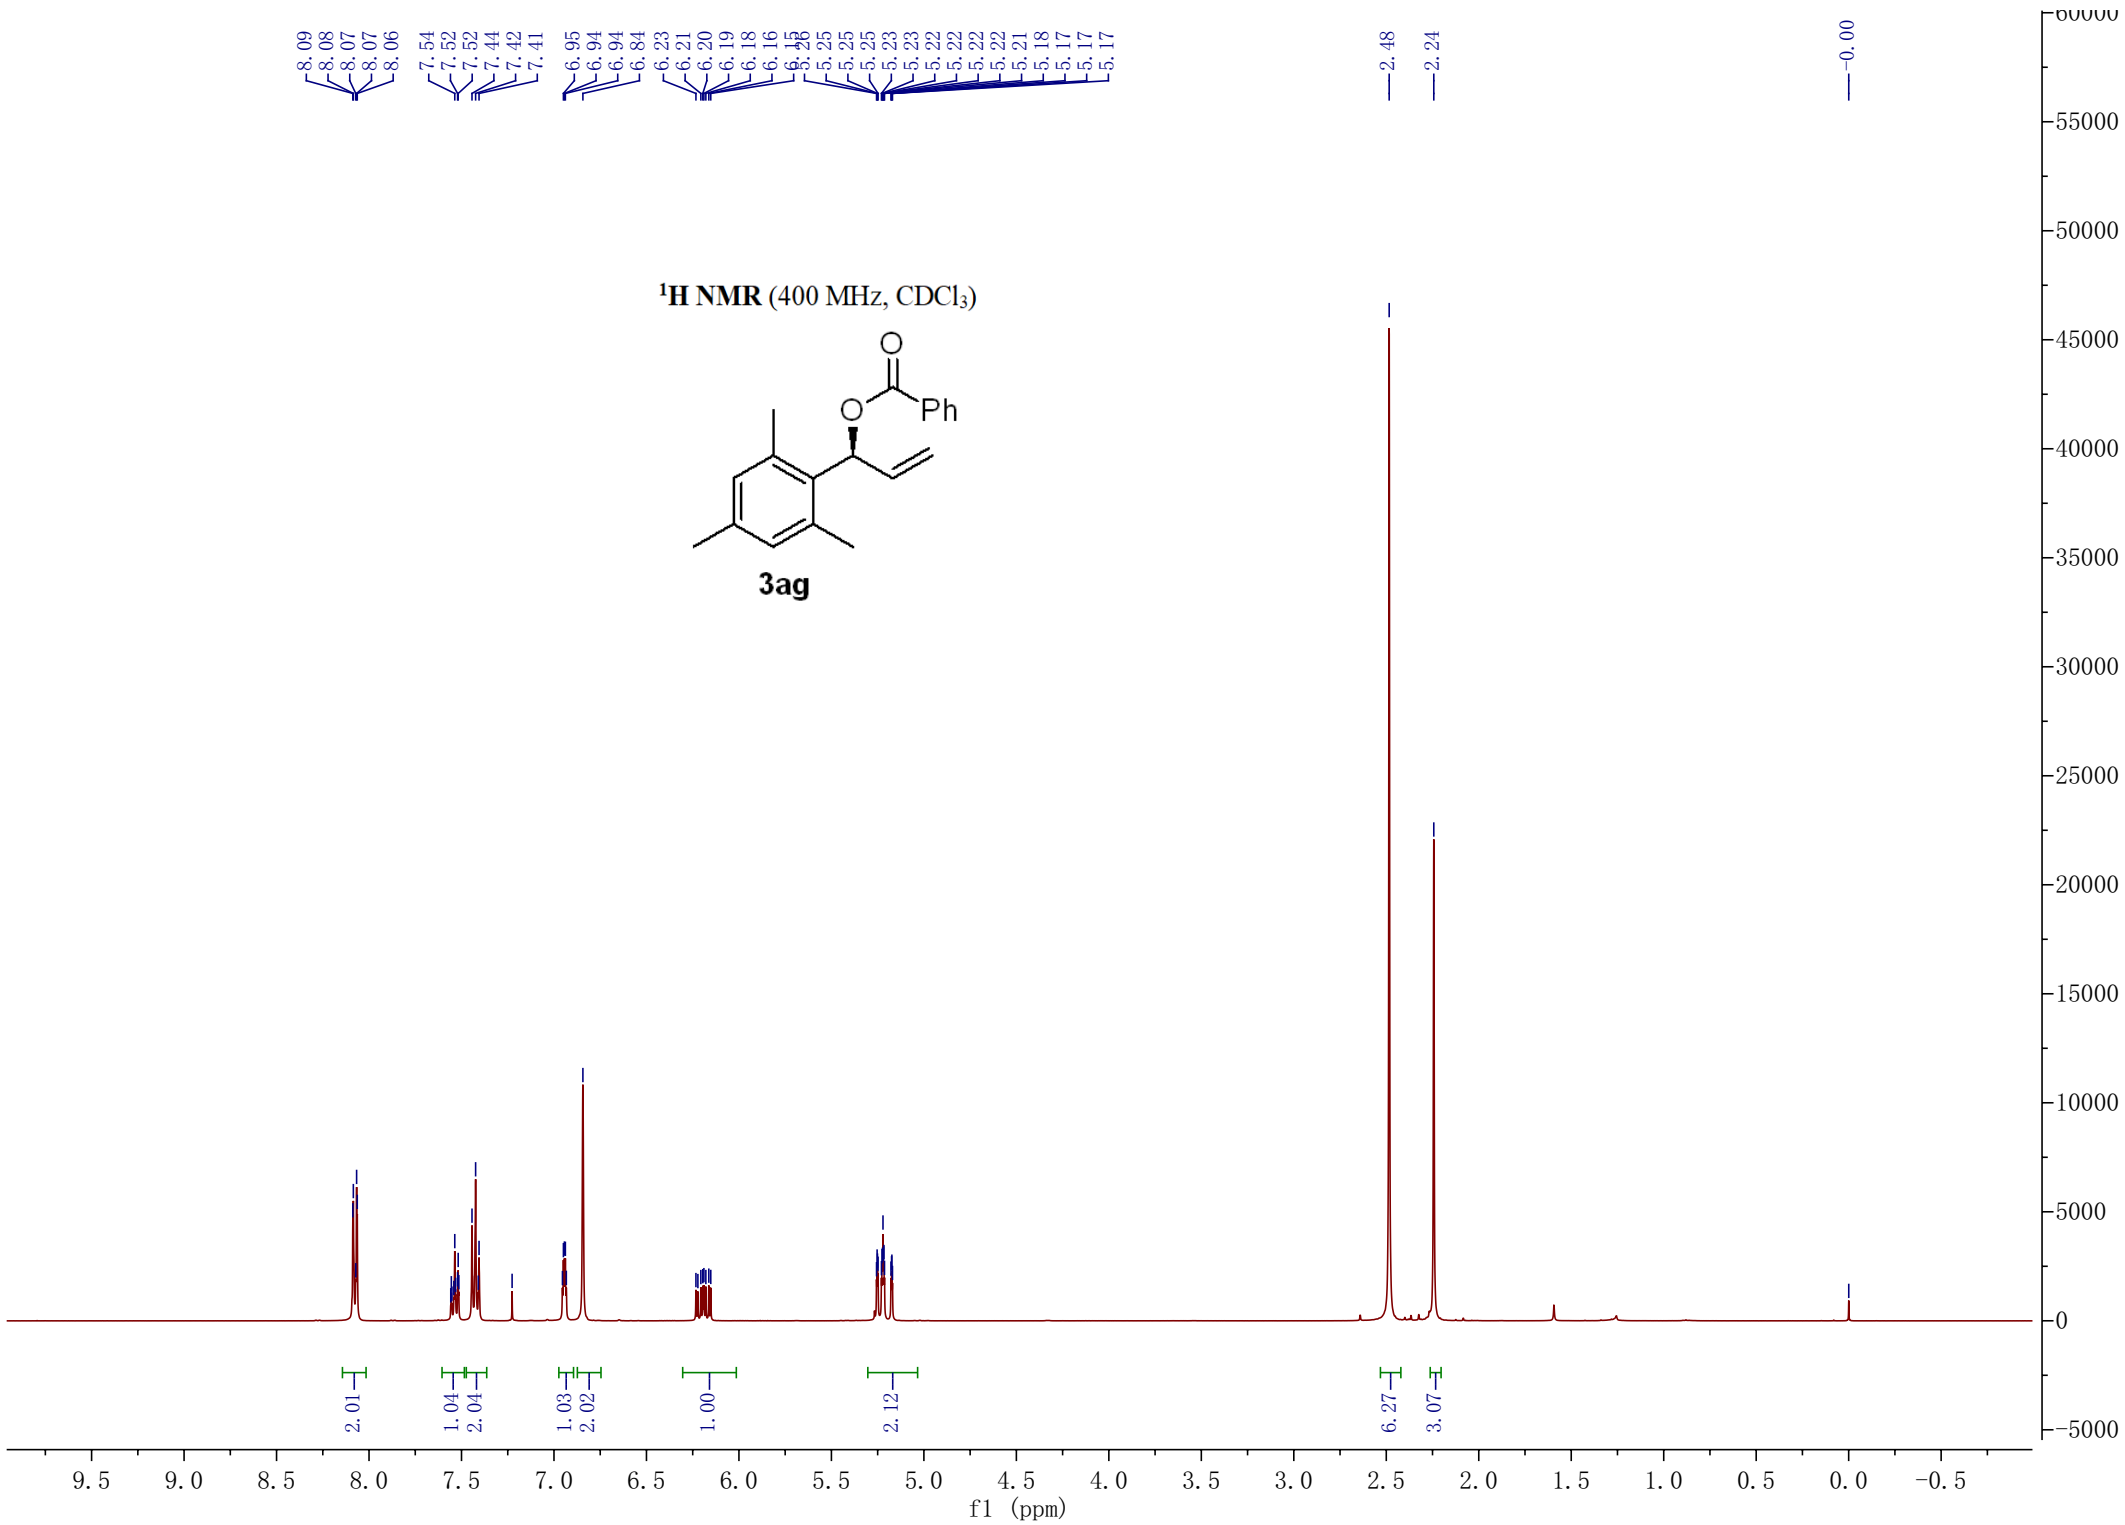

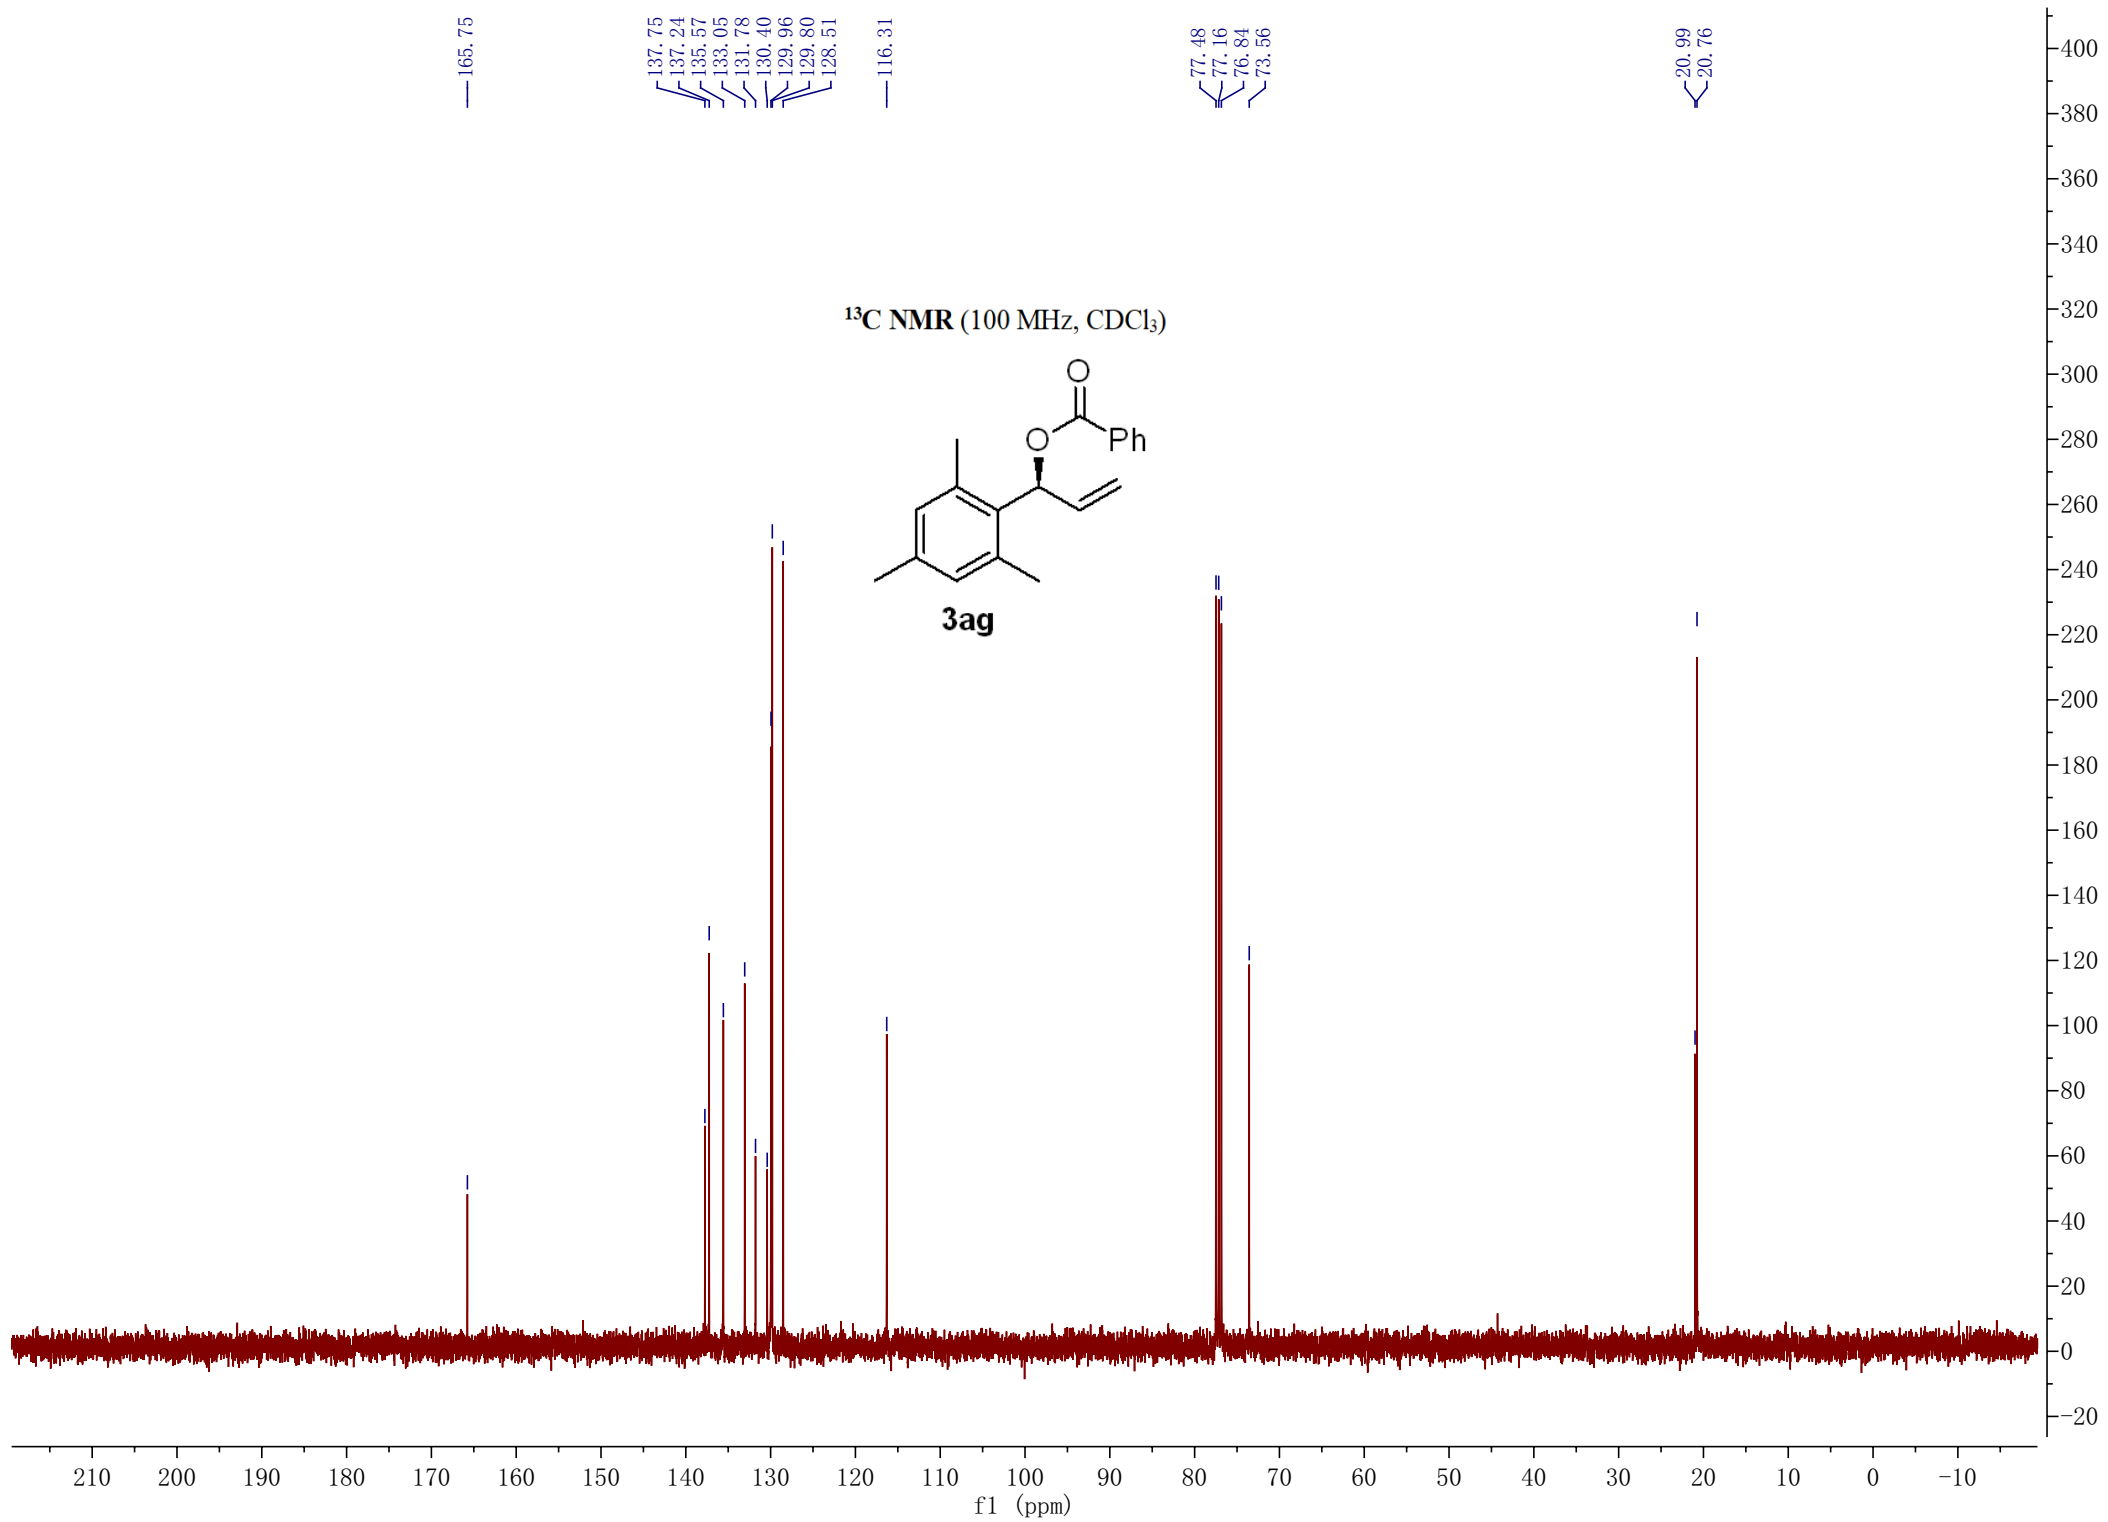

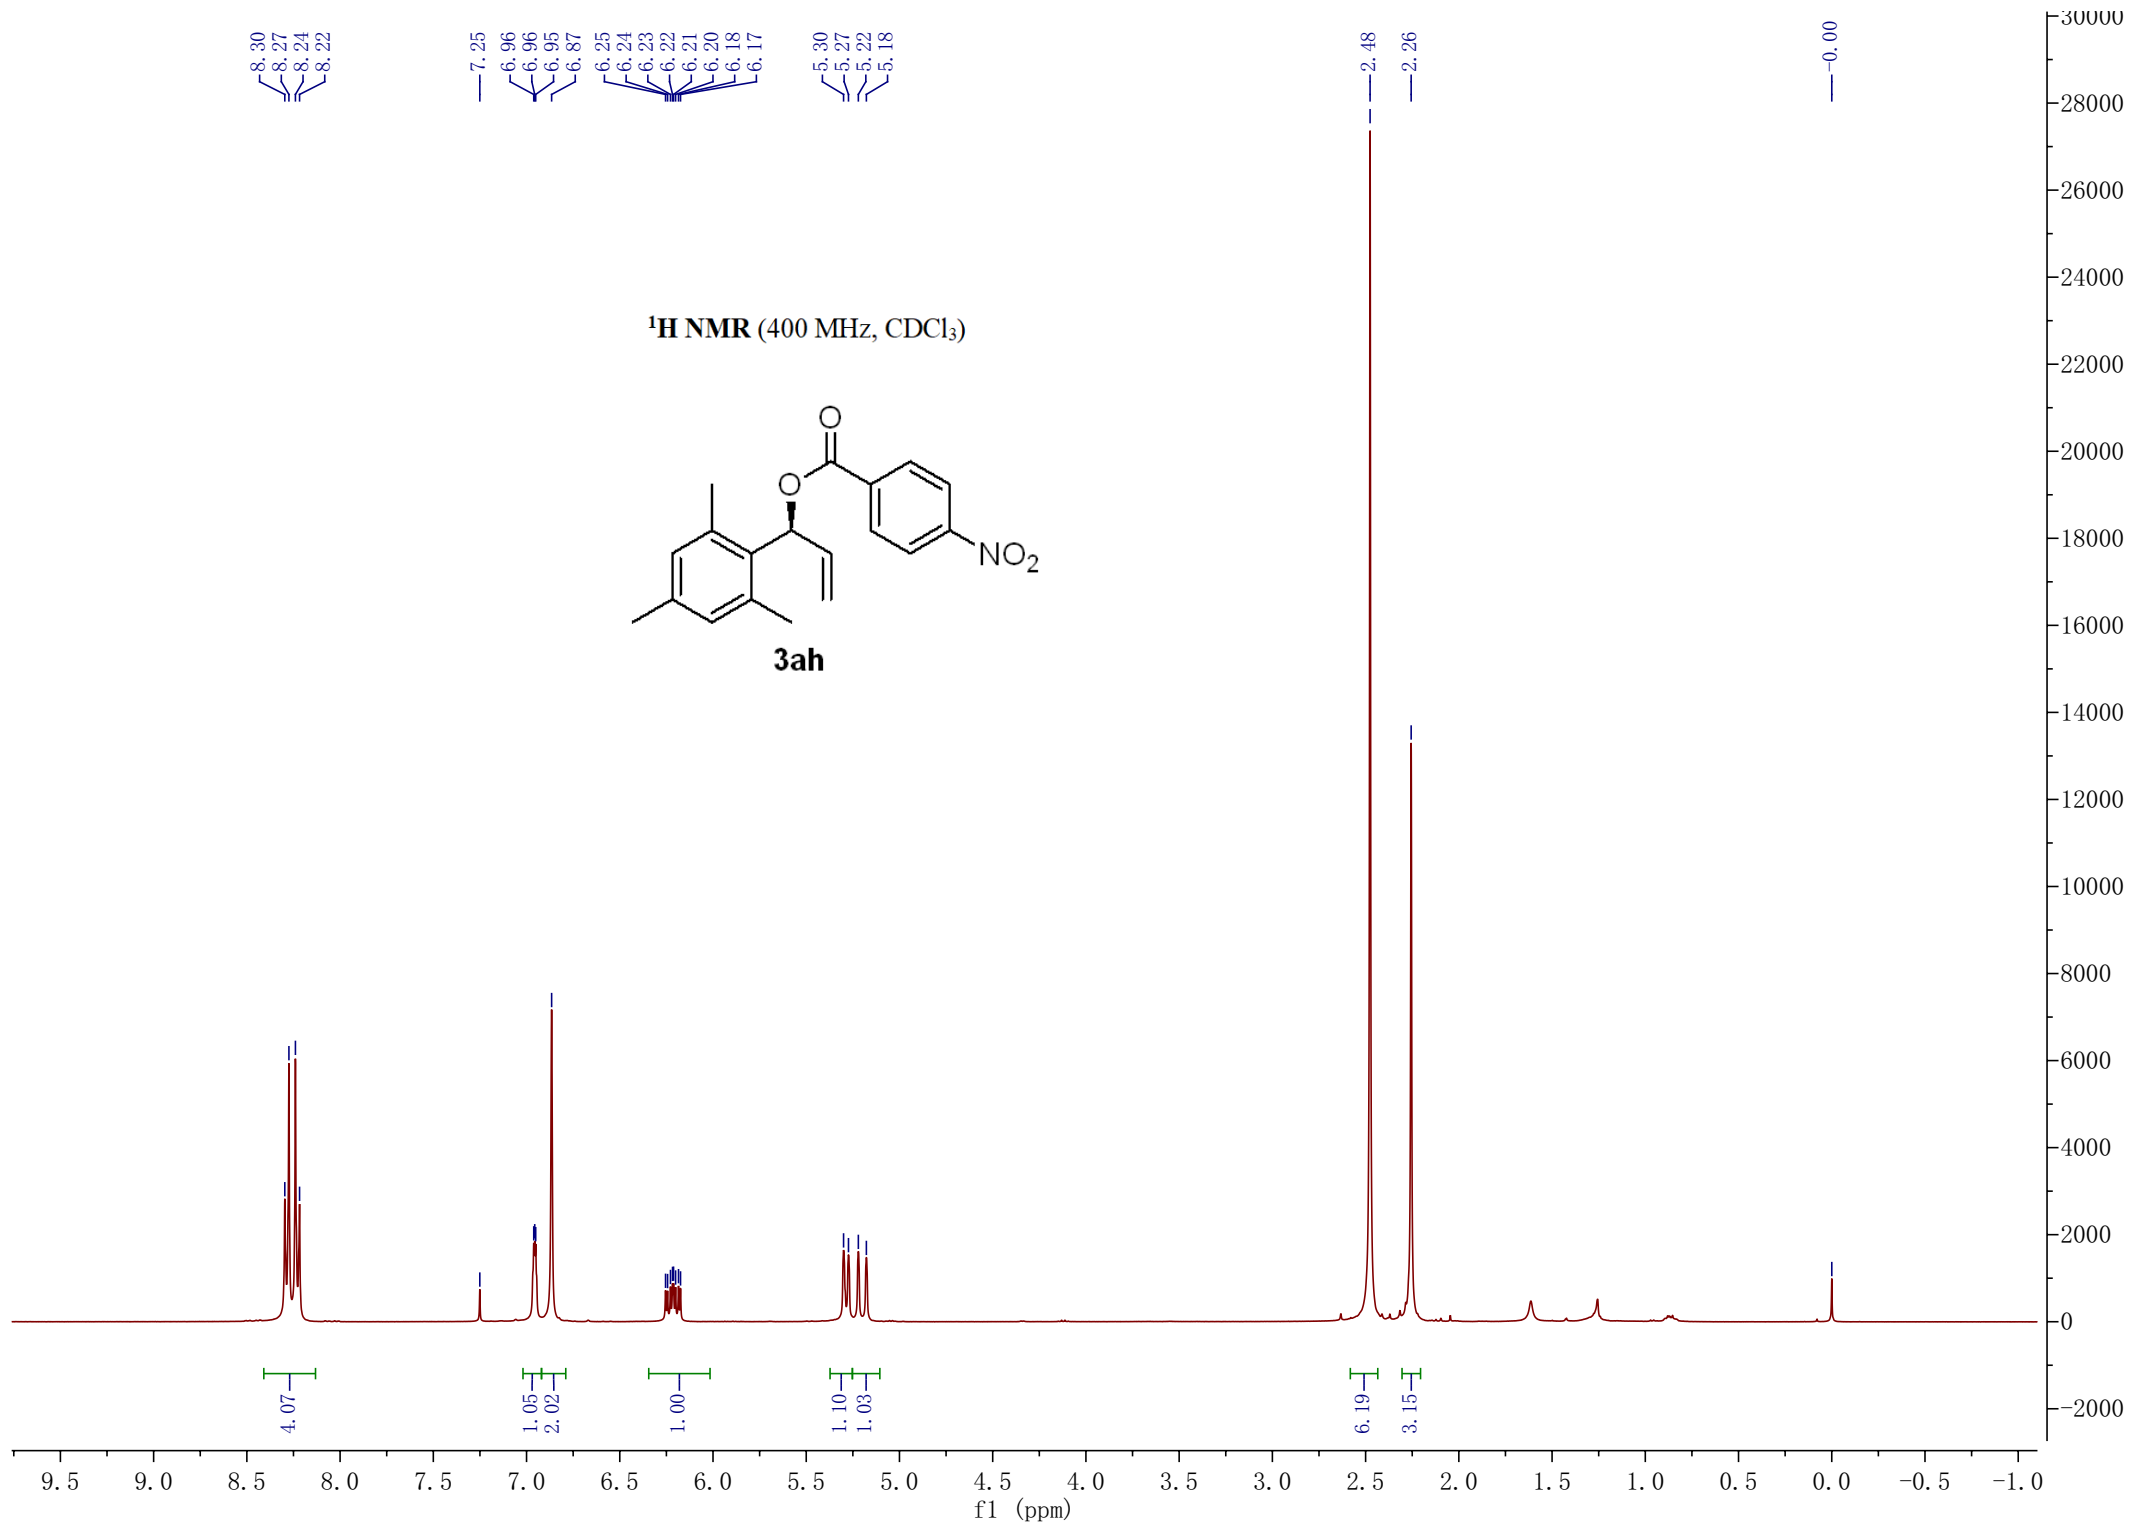



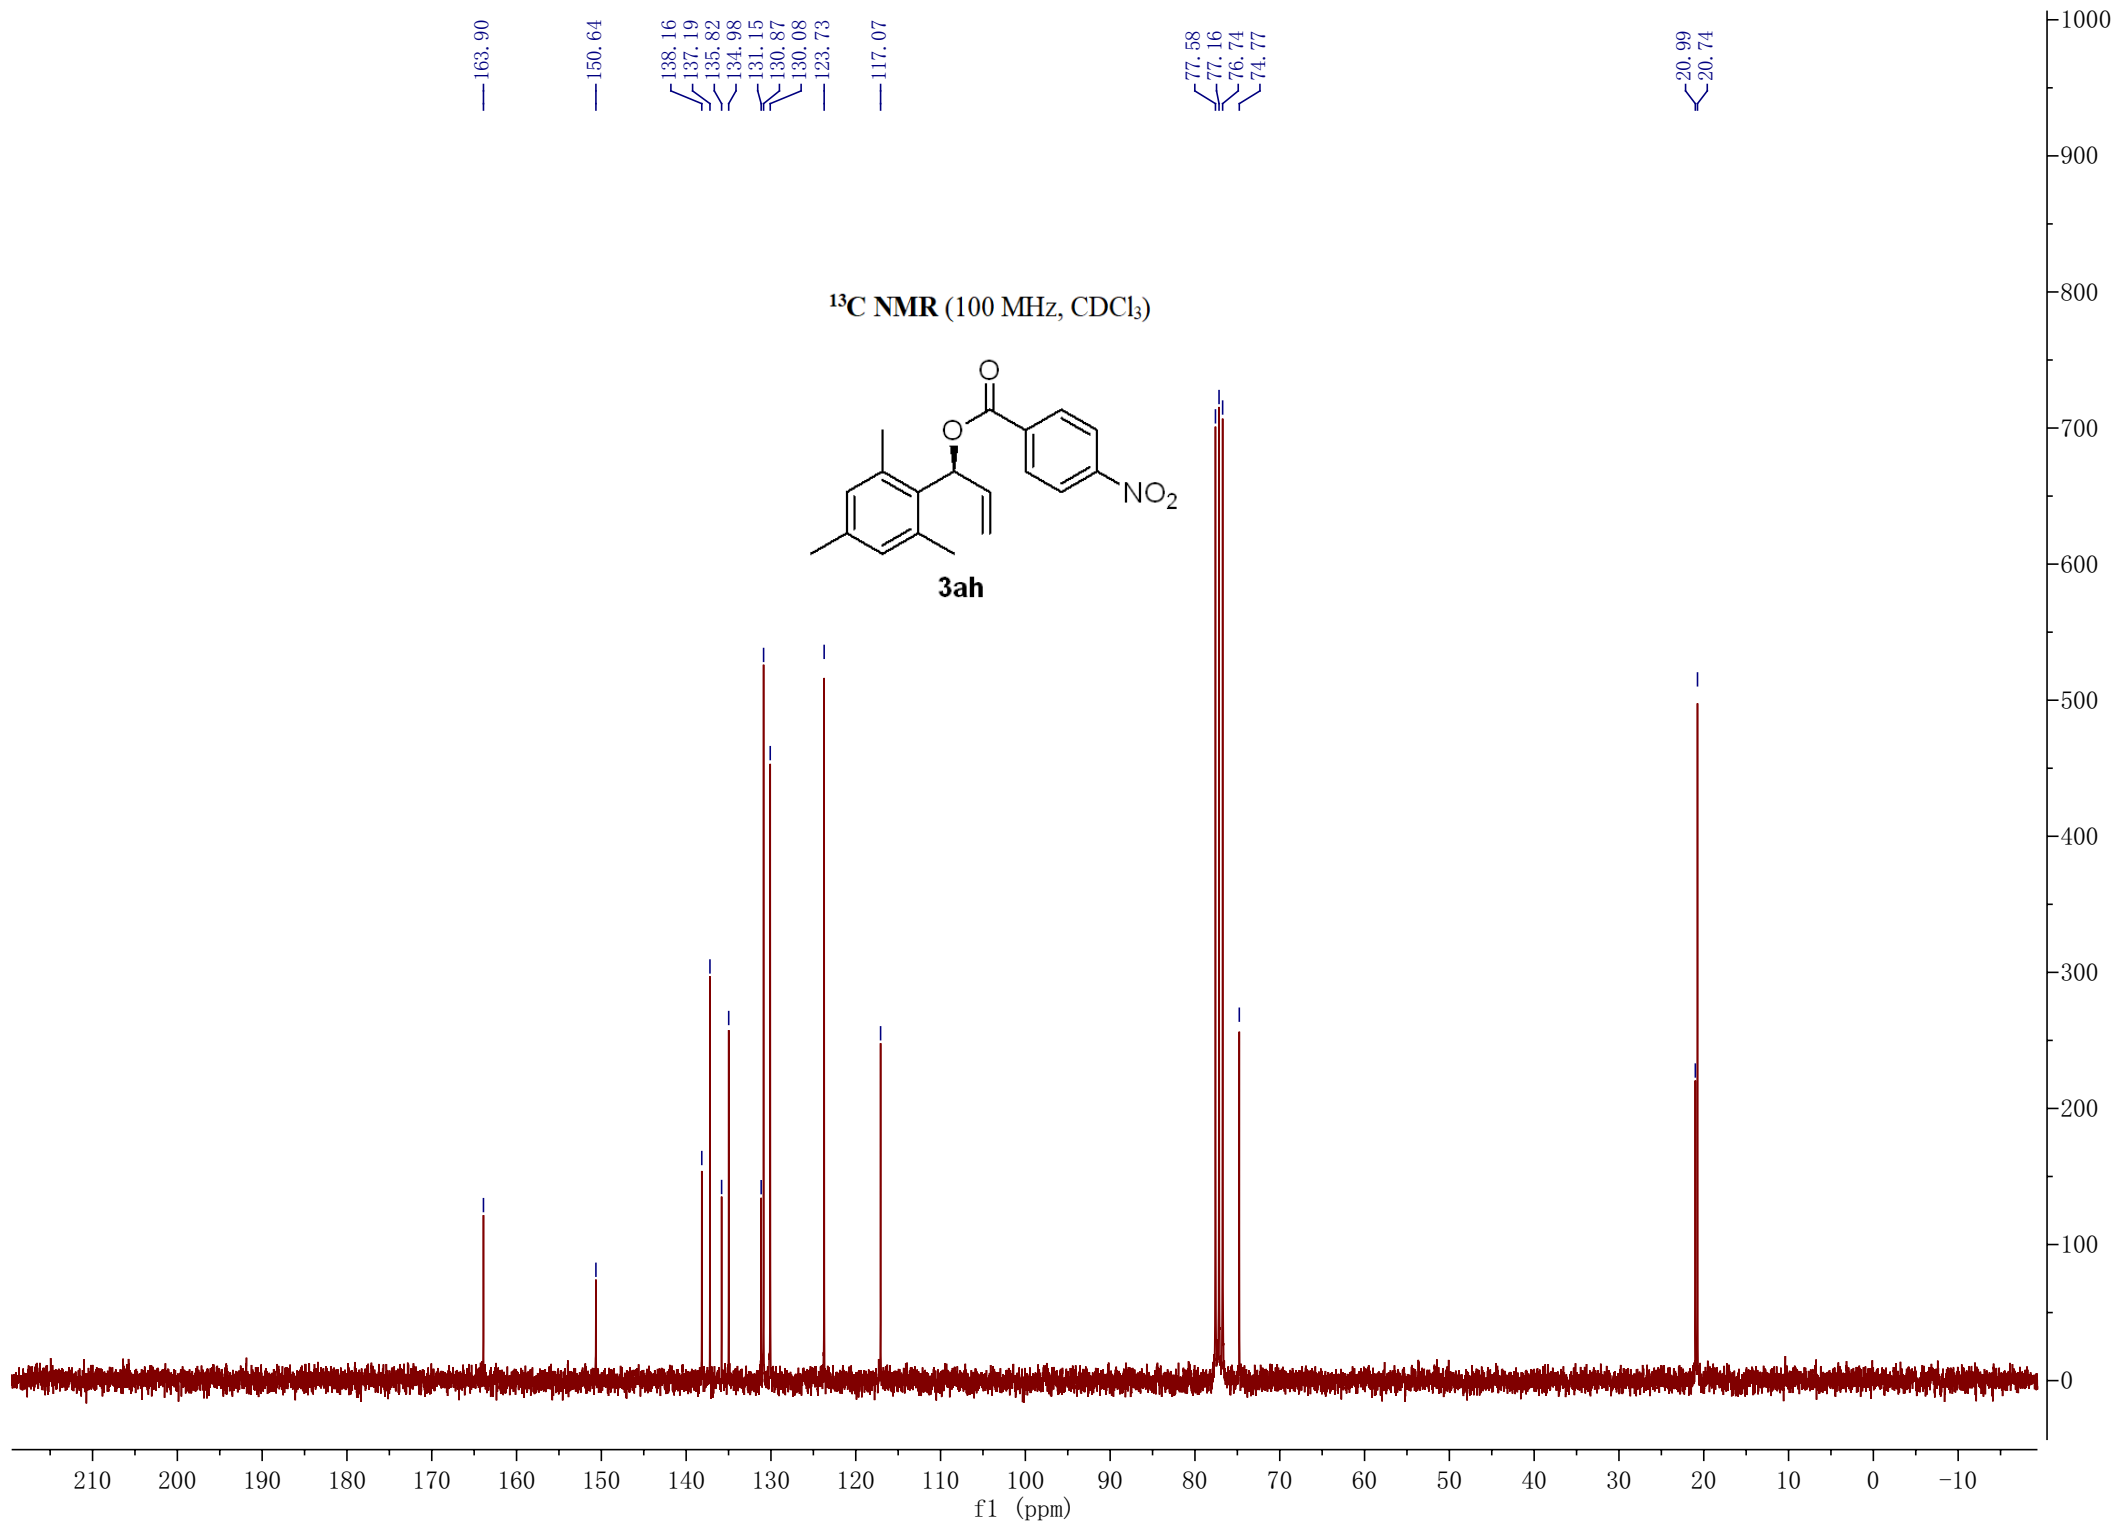

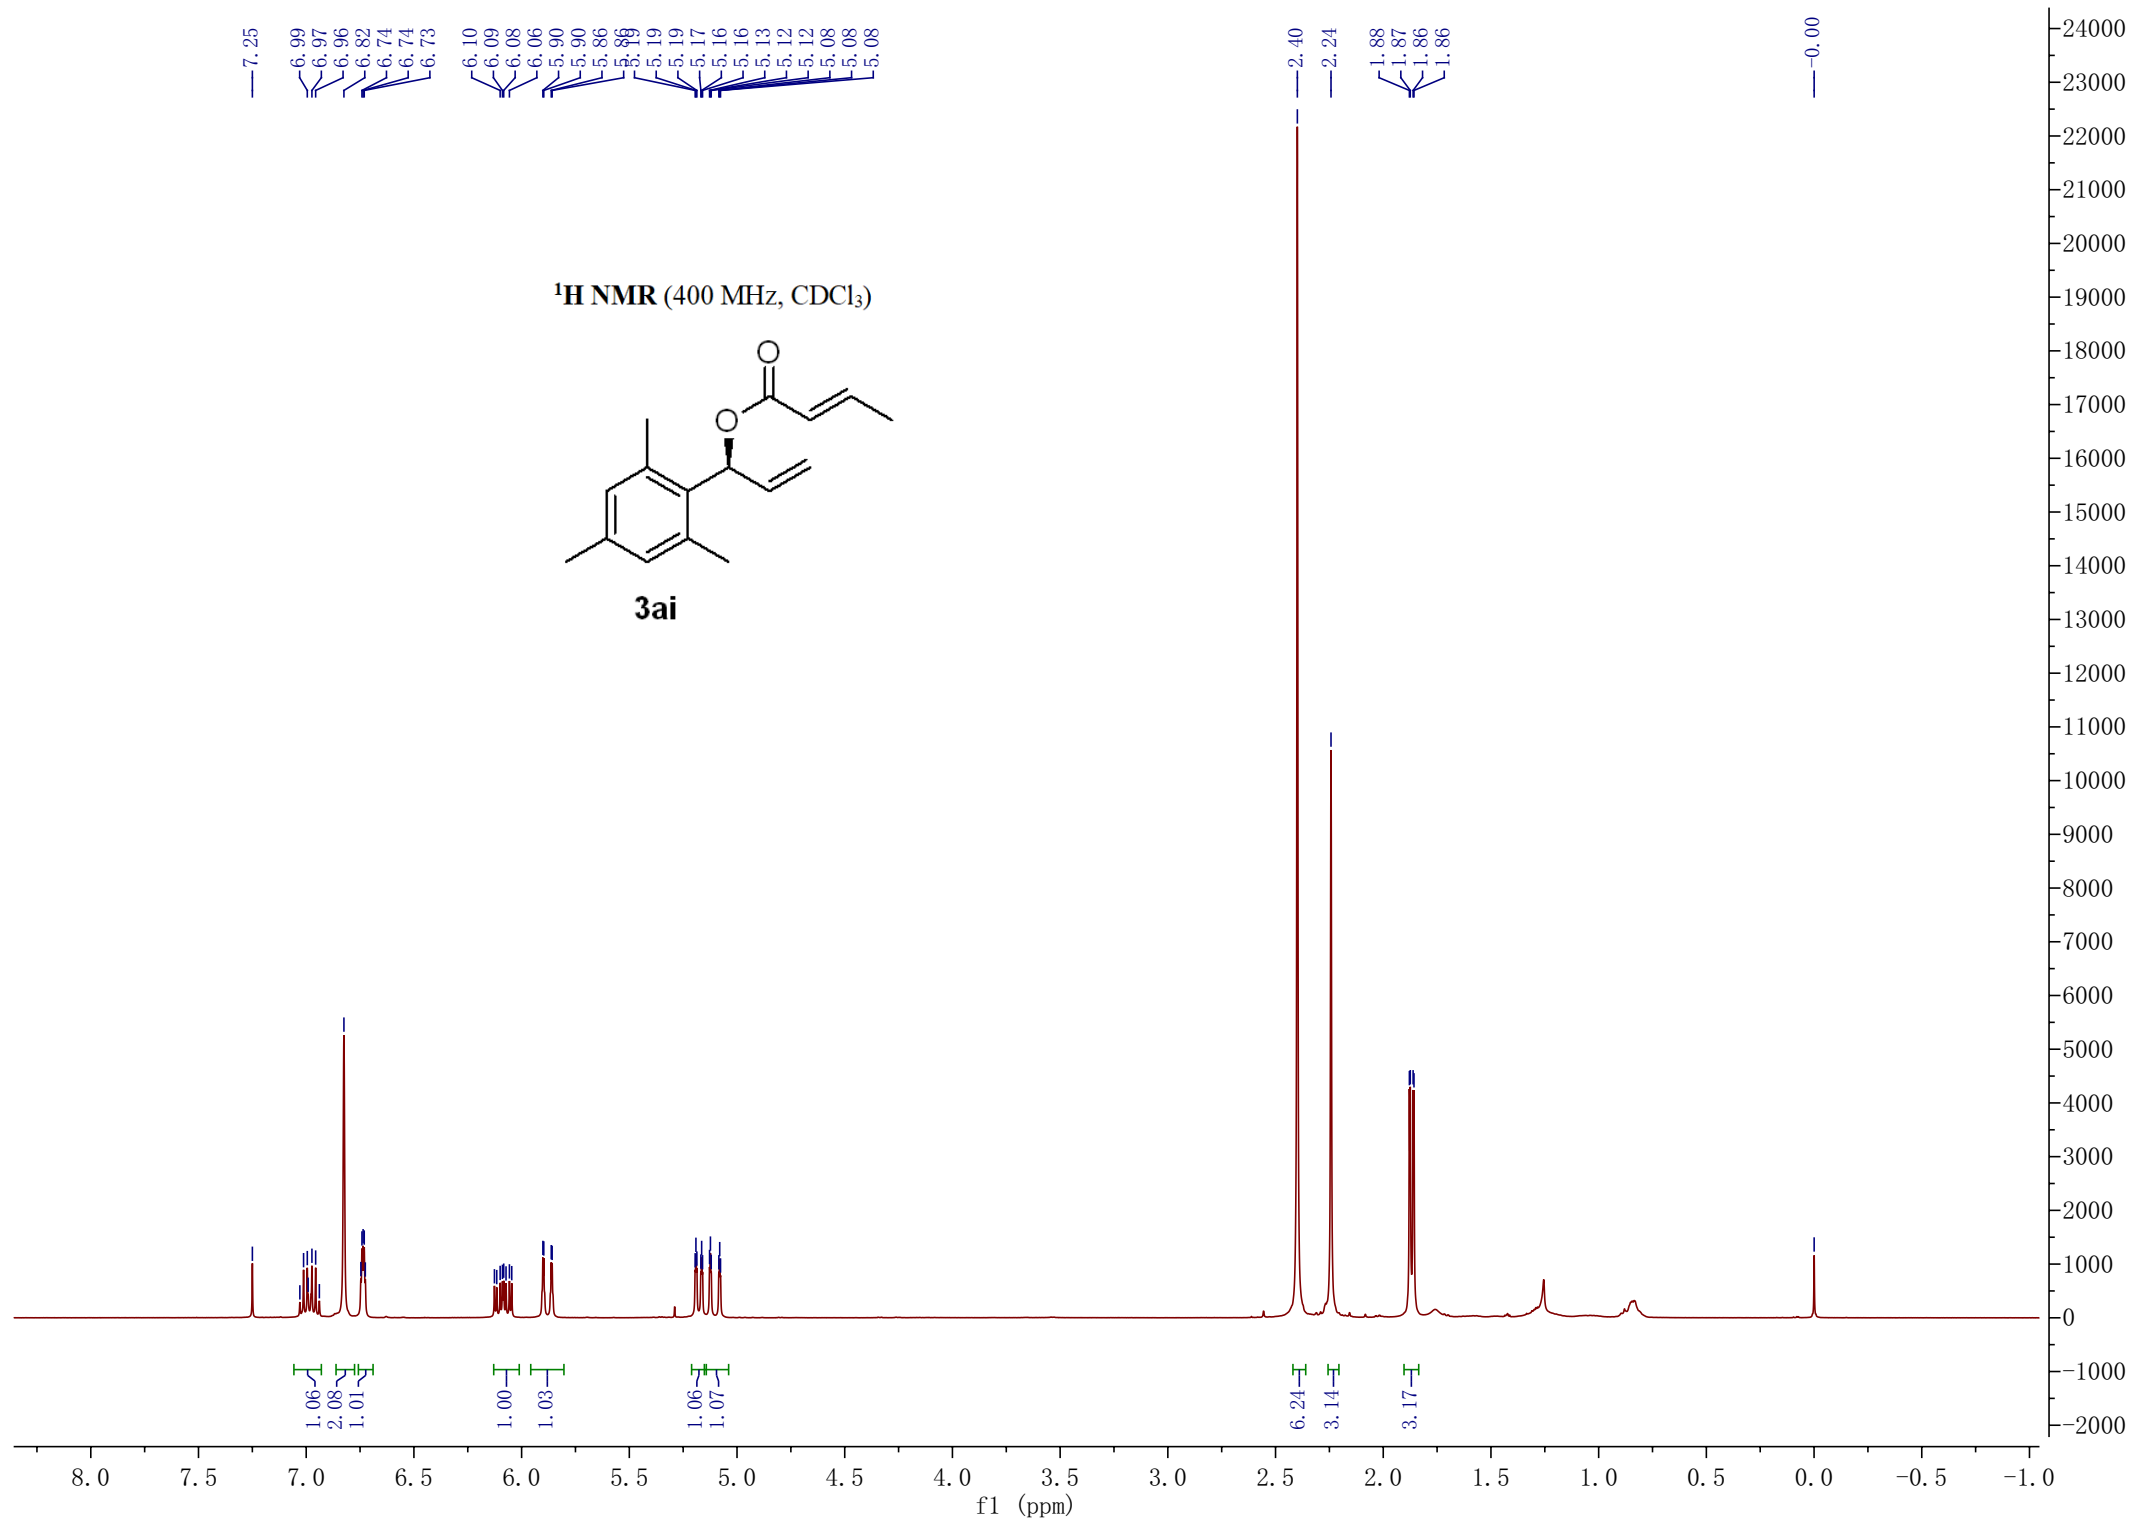

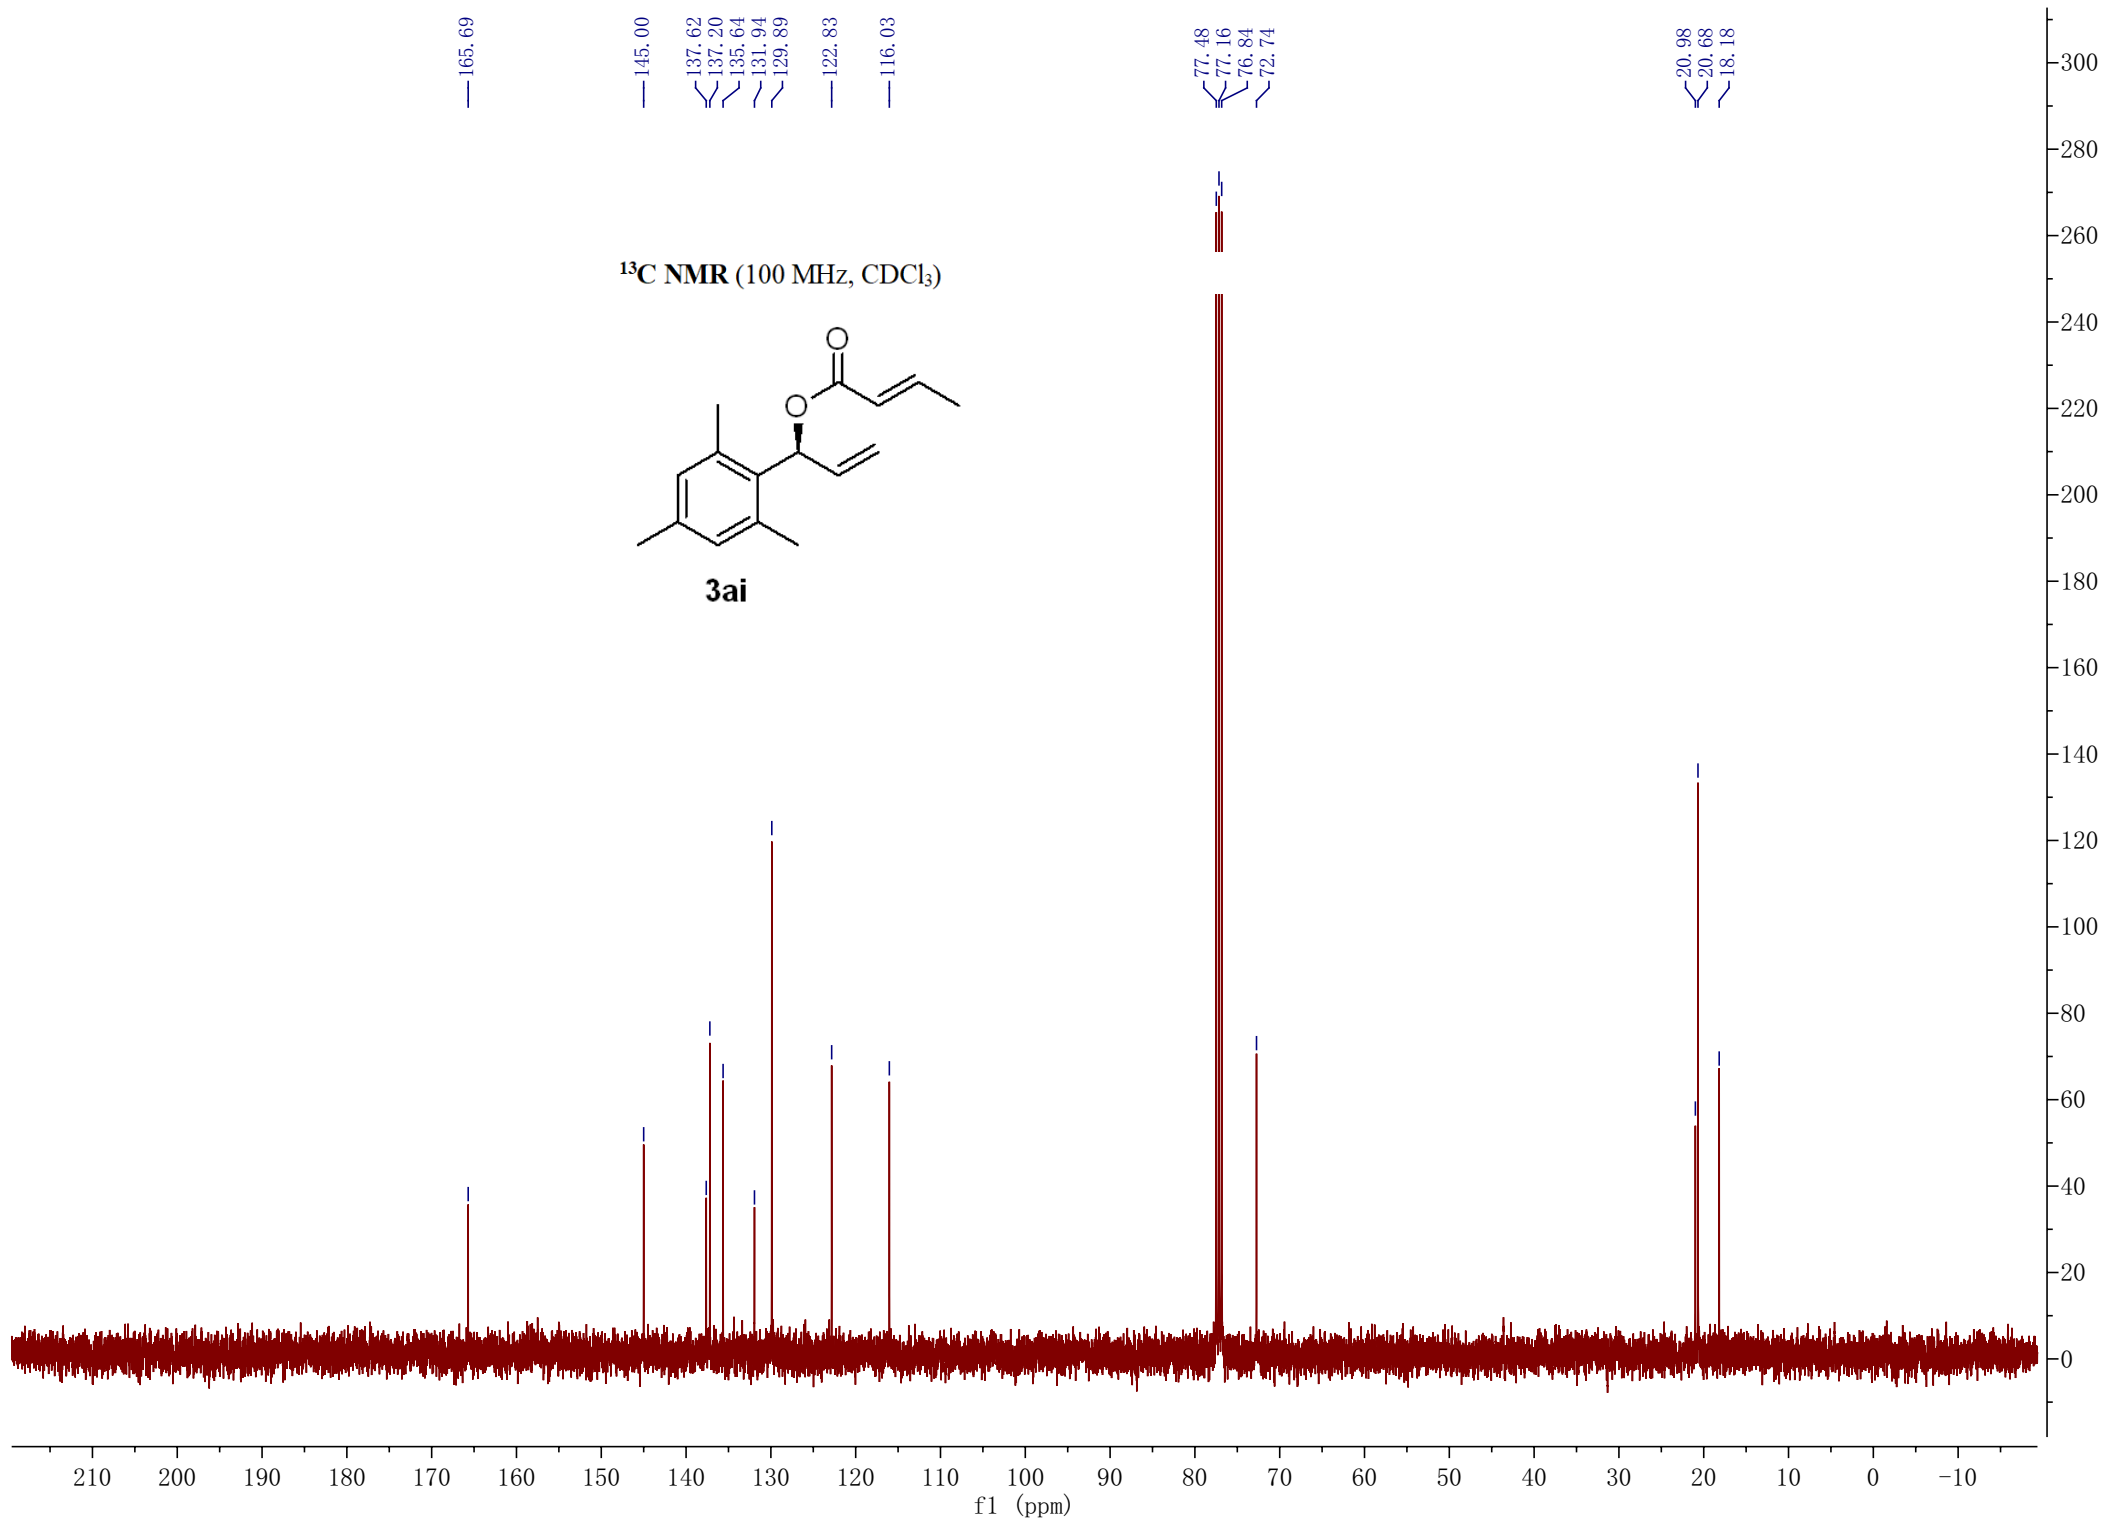

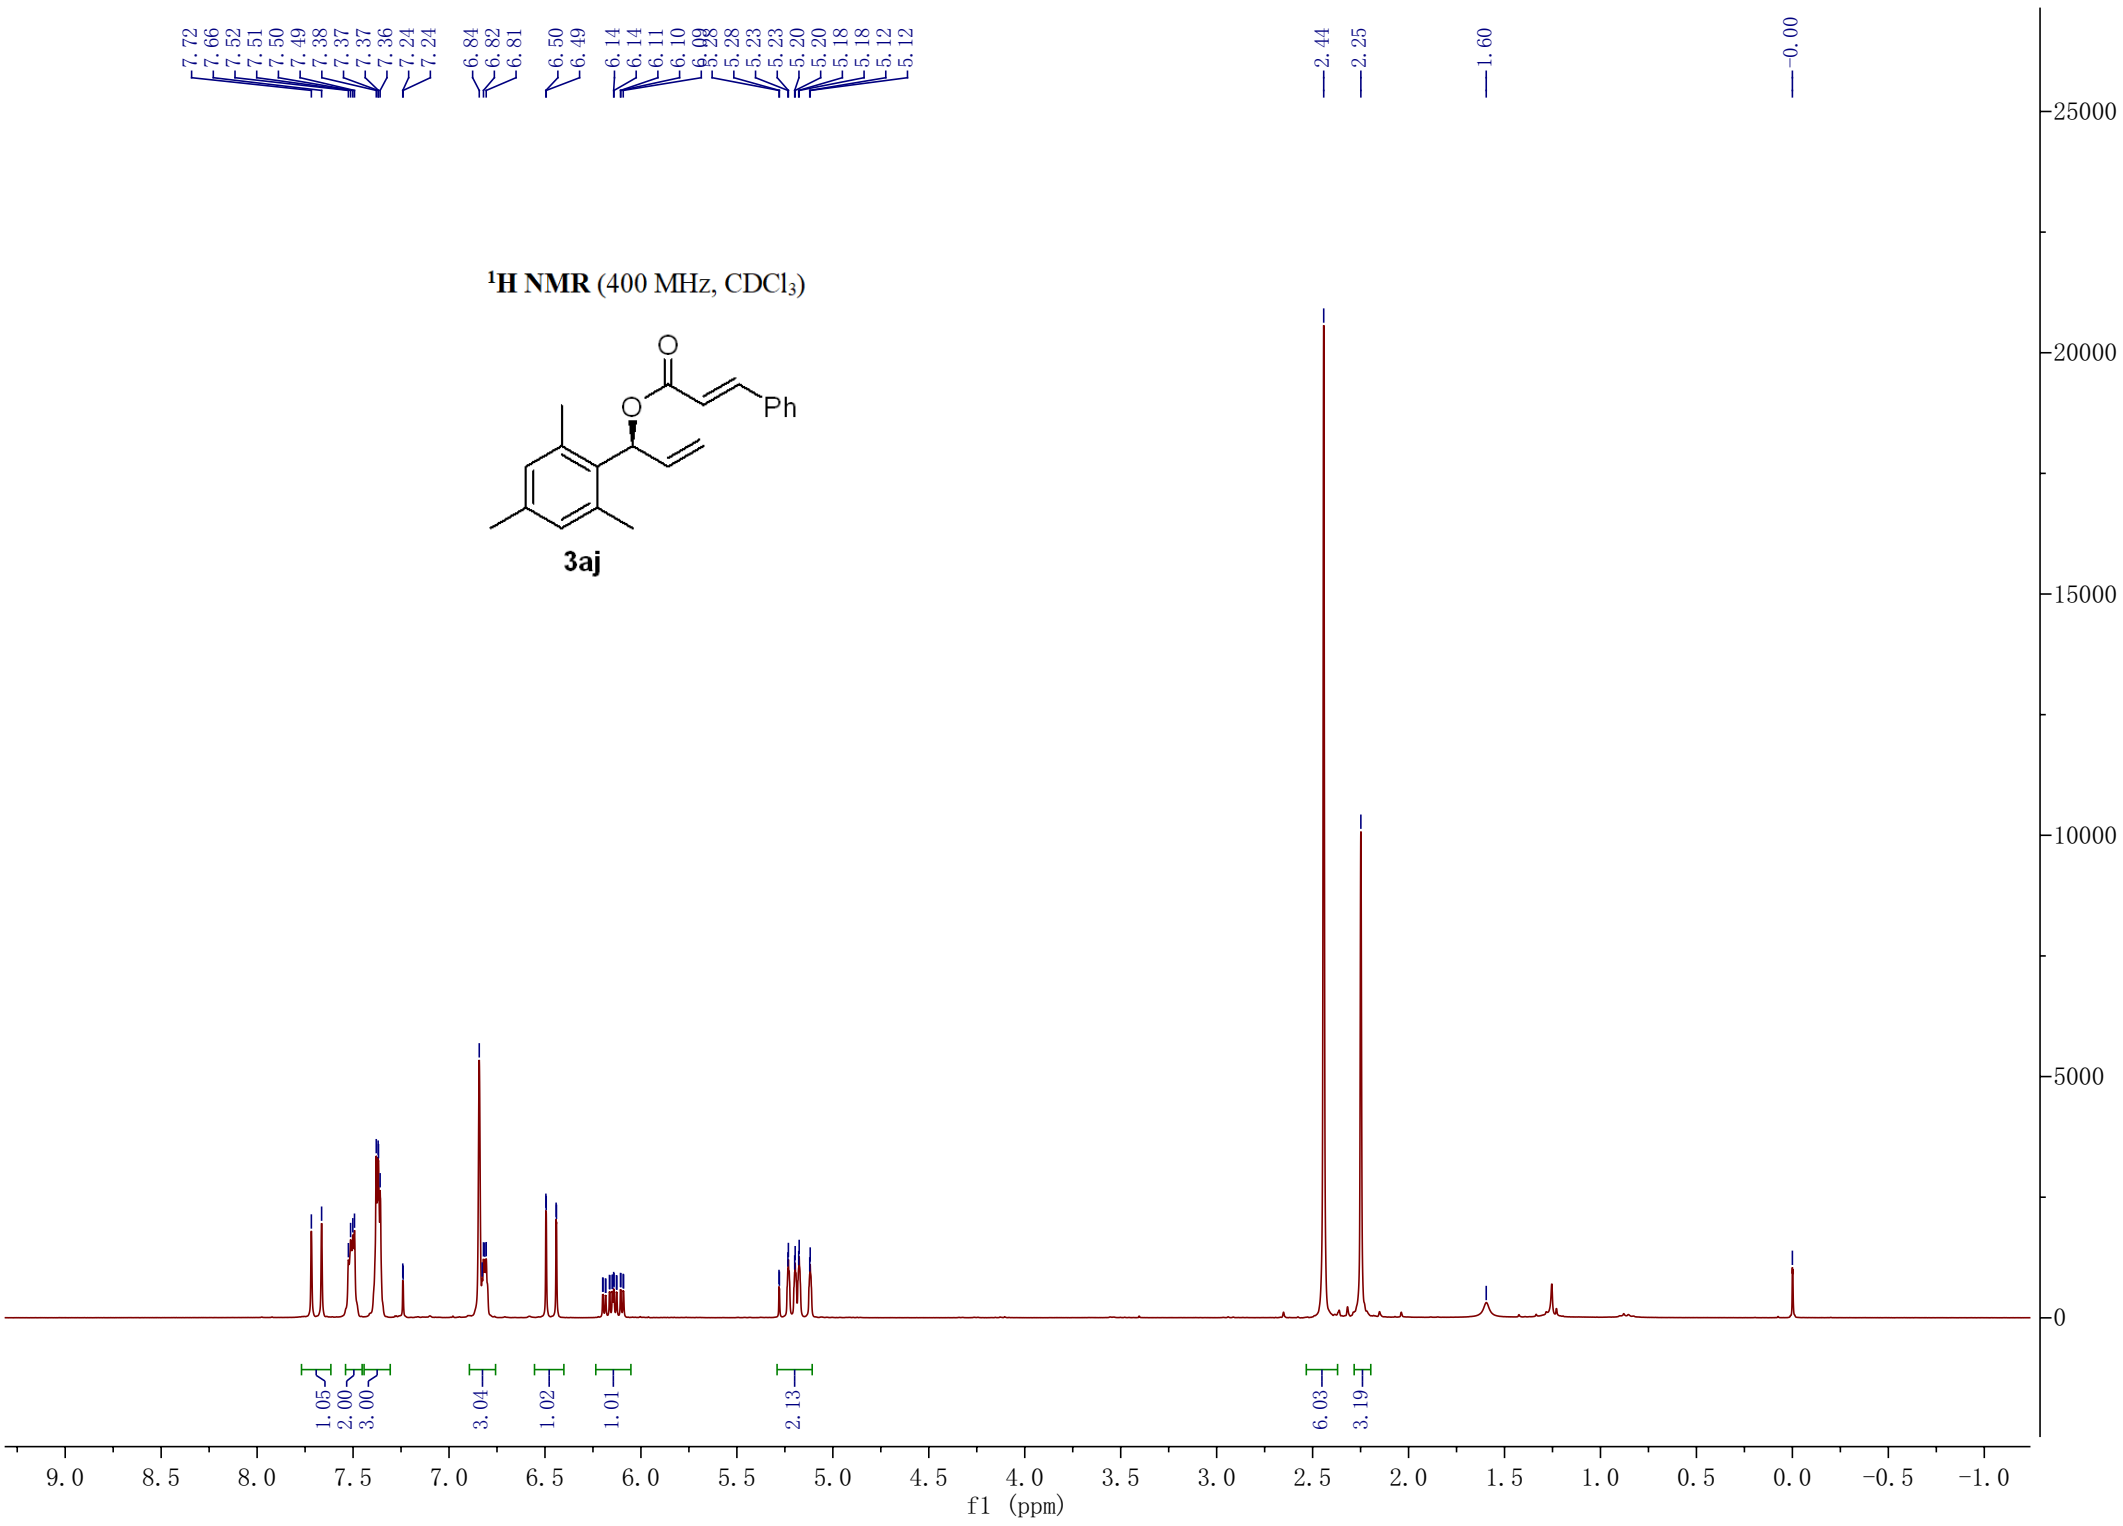

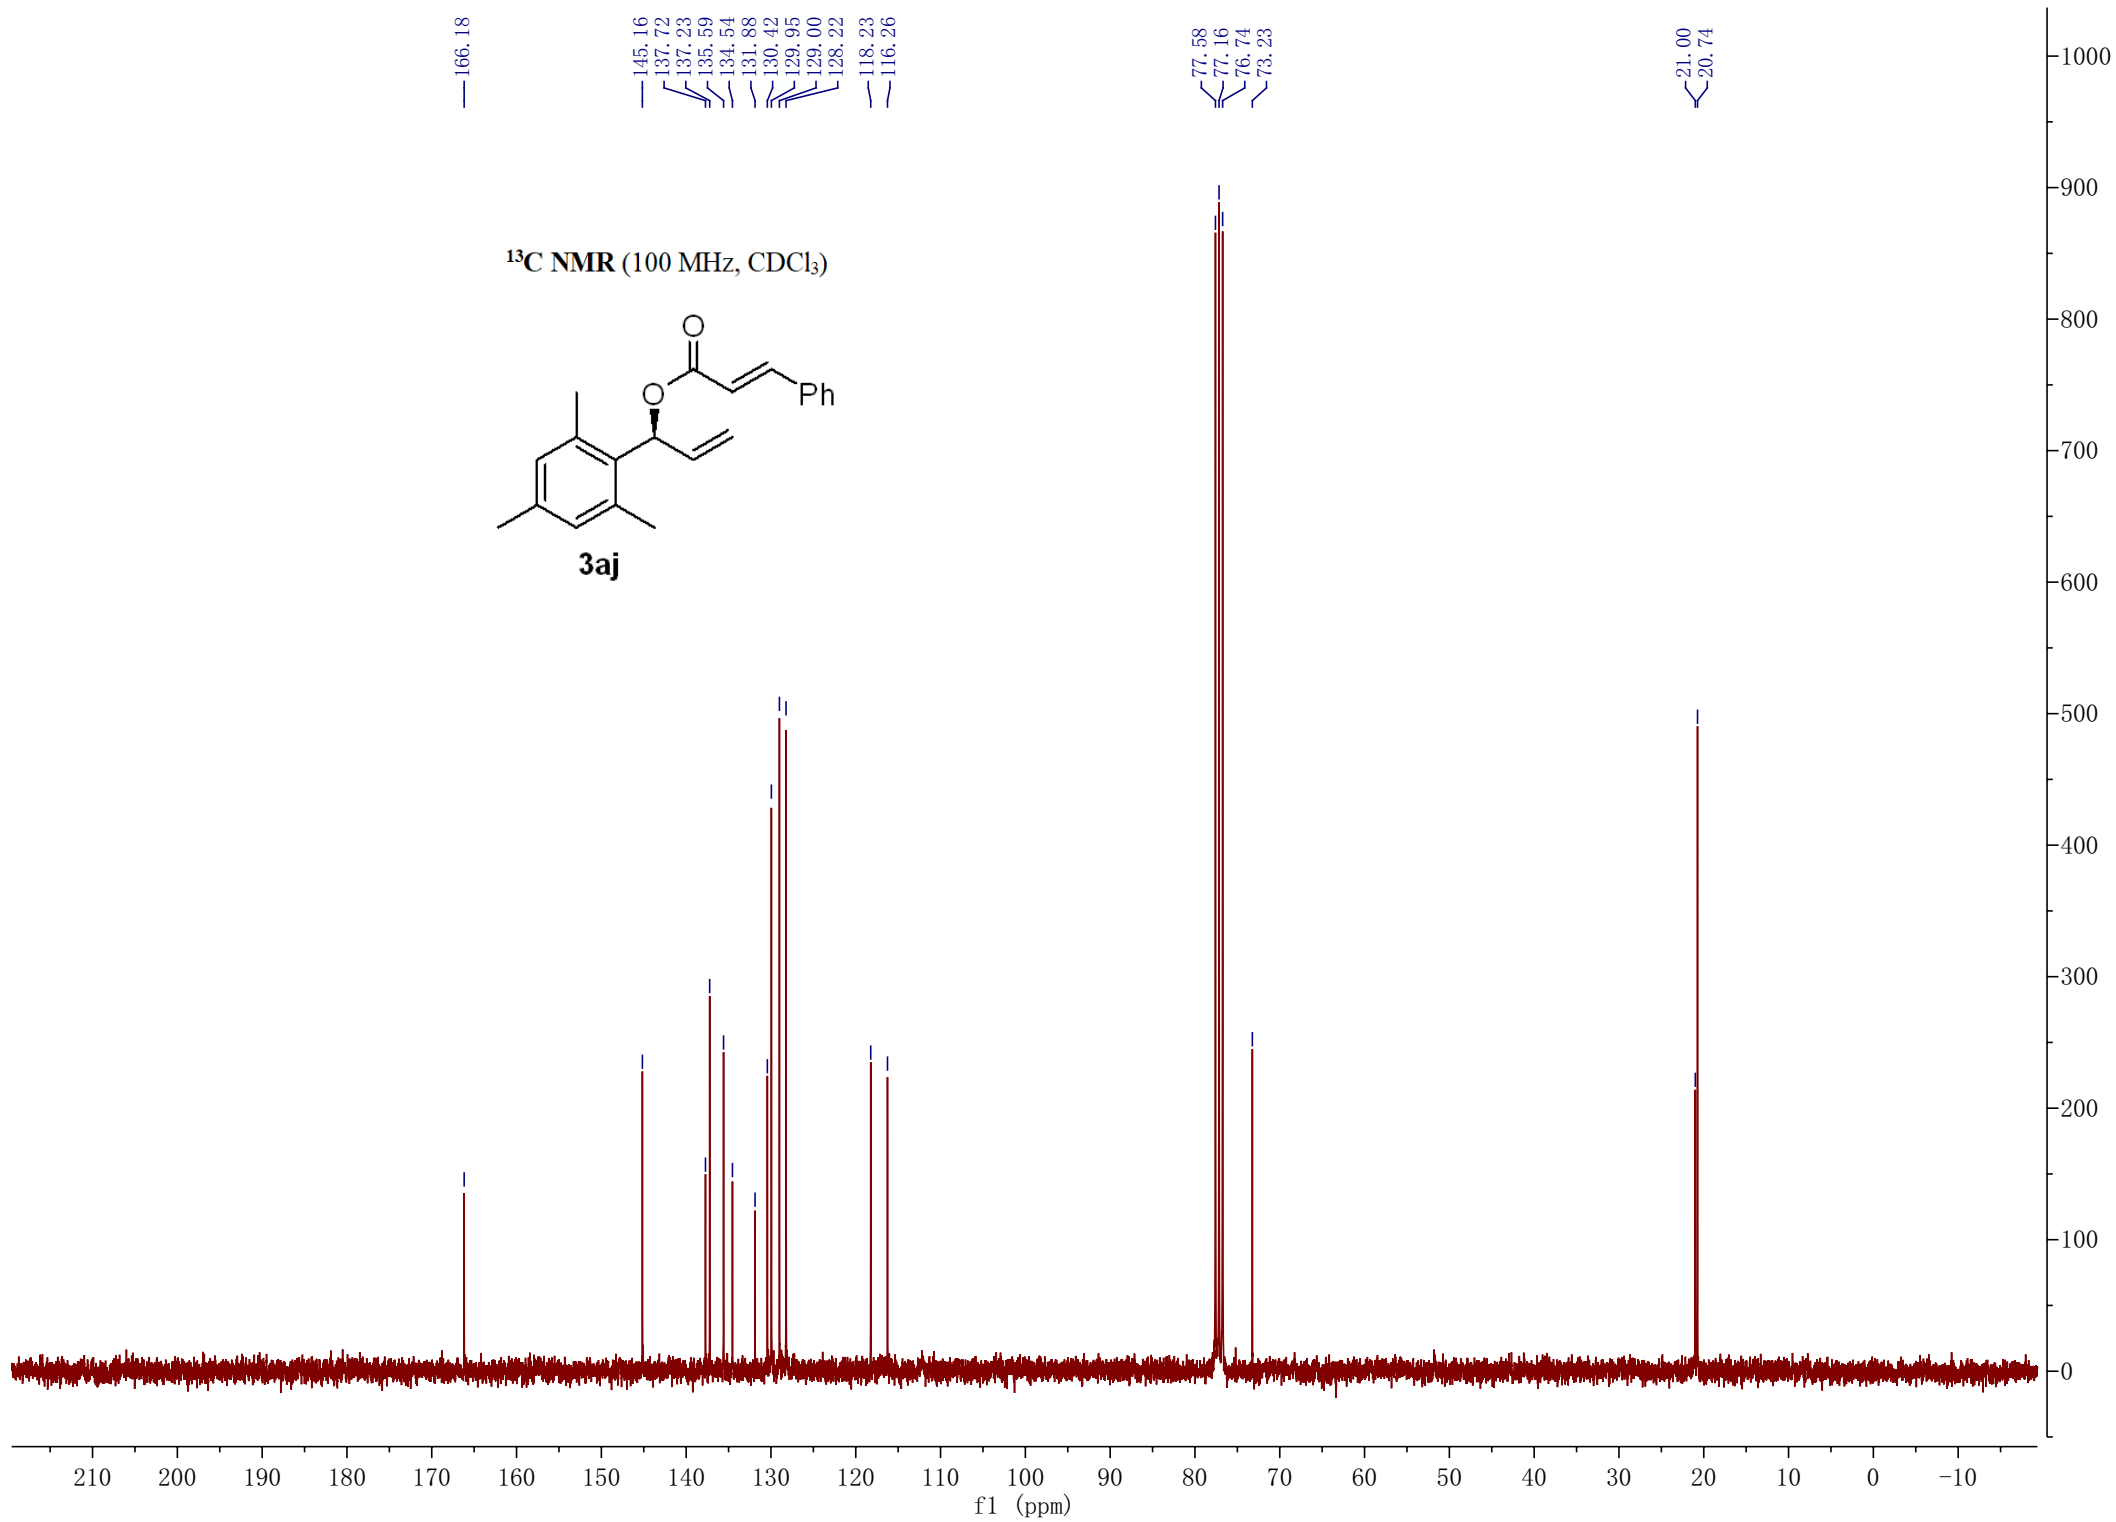

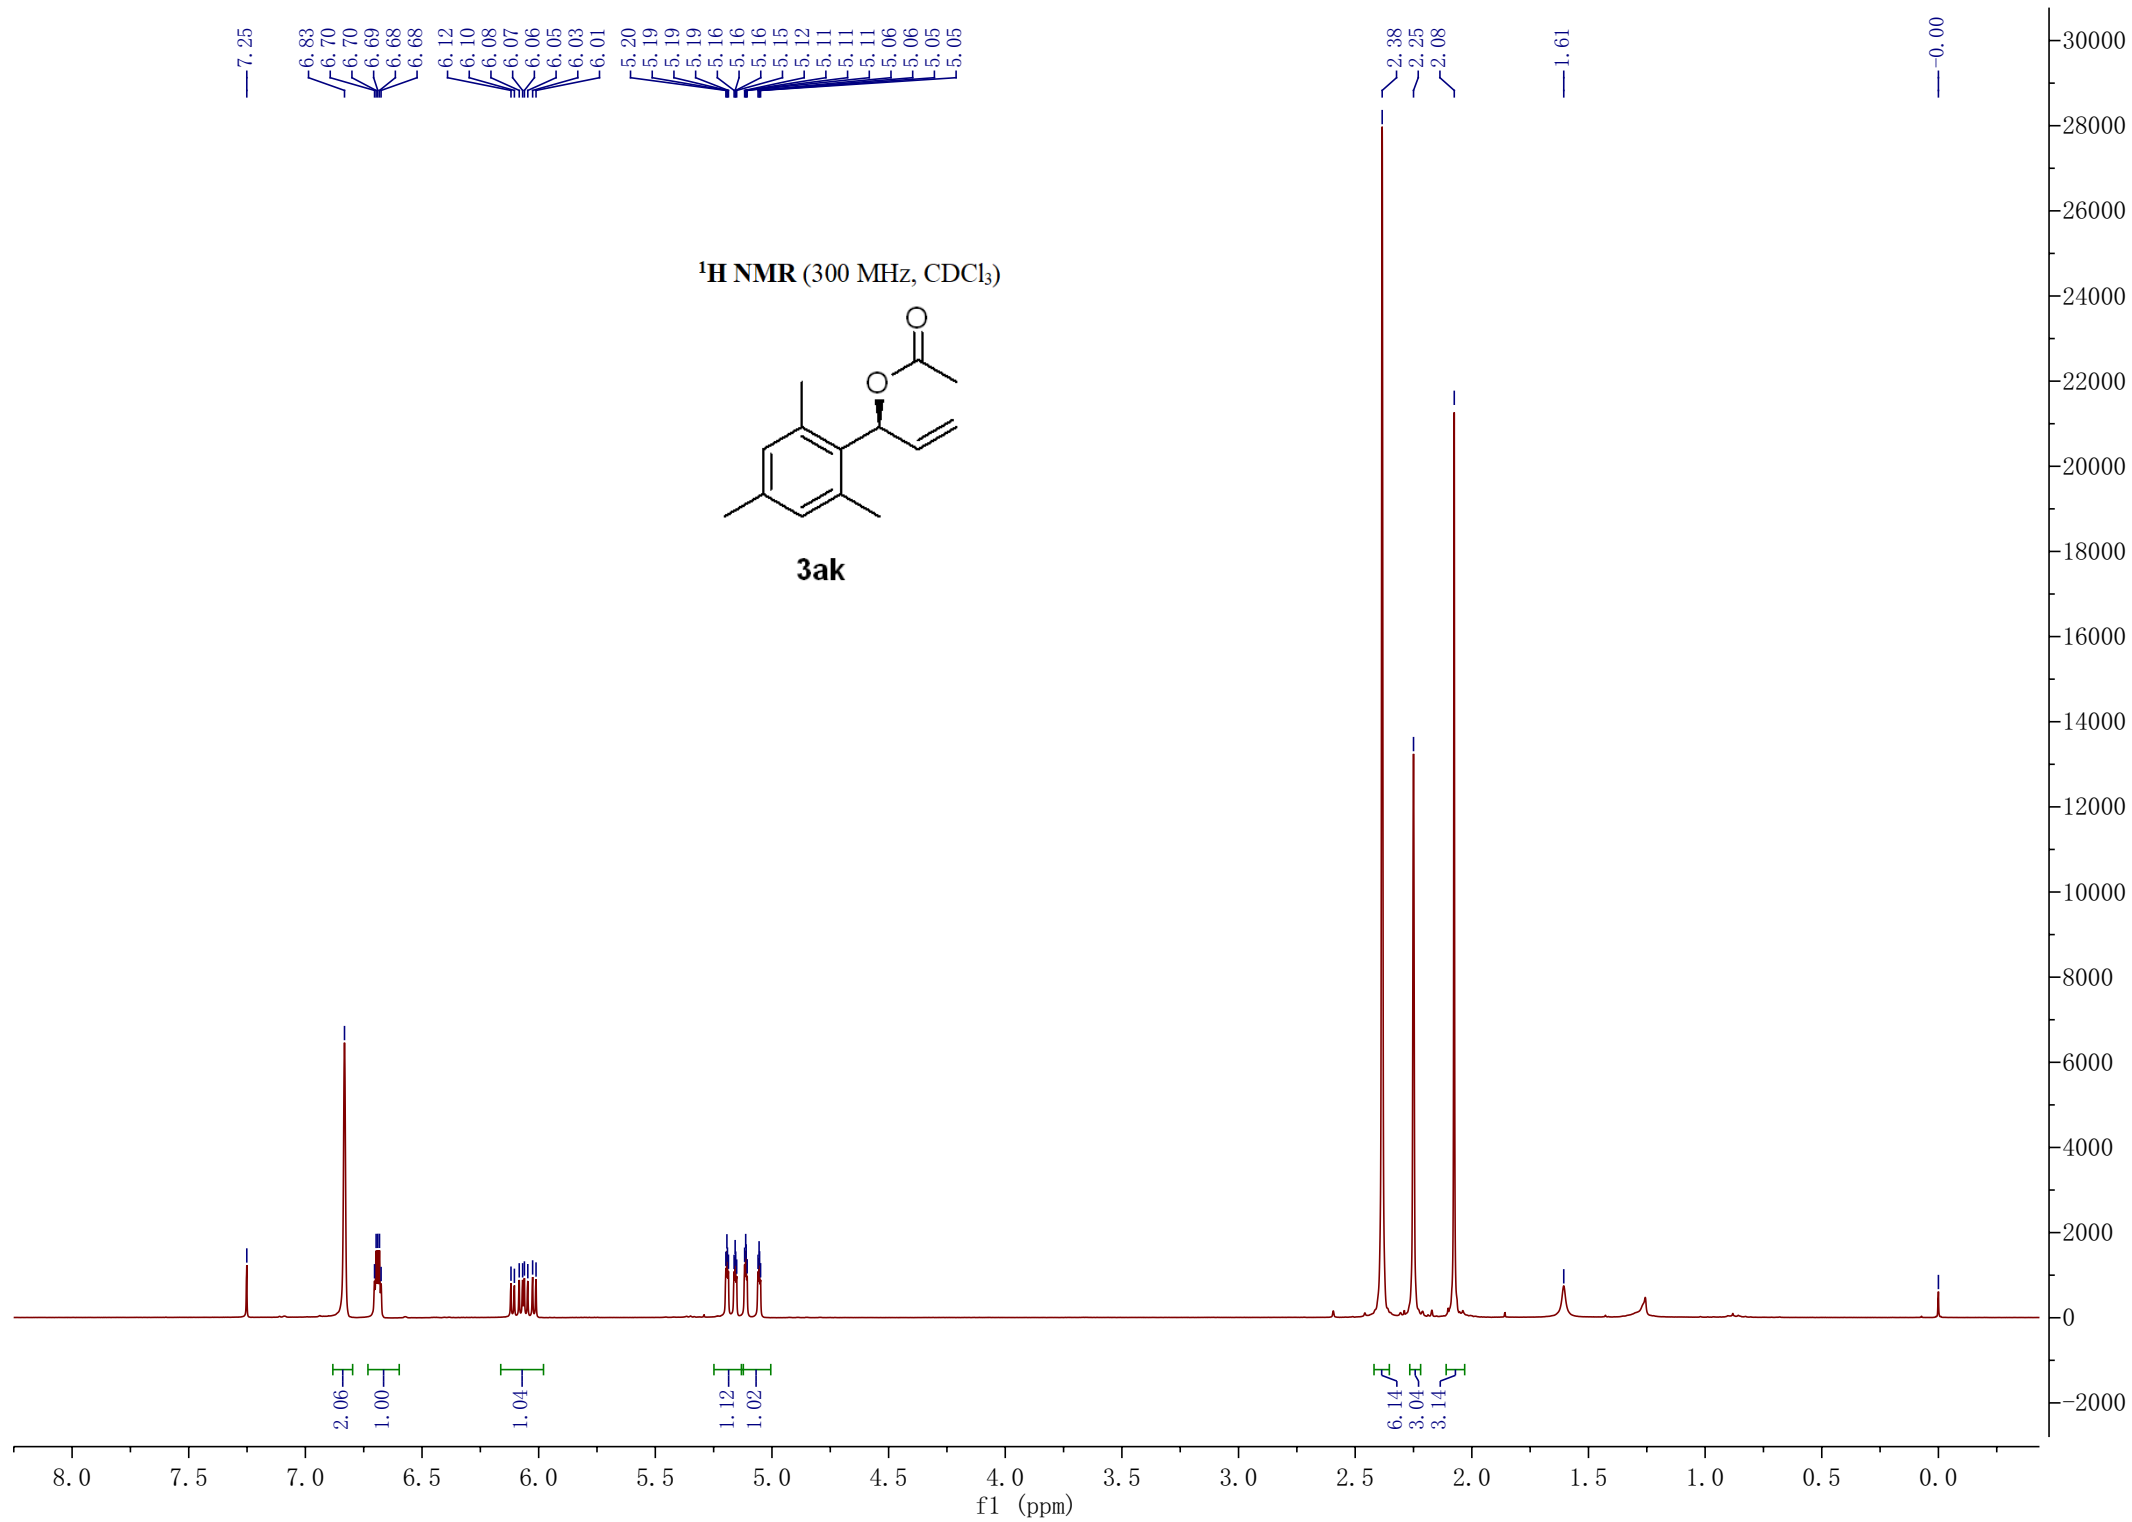

170.24

137.74  
137.24  
135.52  
131.83  
129.91

116.16

77.58  
77.16  
76.74  
73.04

21.19  
20.98  
20.64

<sup>13</sup>C NMR (75 MHz, CDCl<sub>3</sub>)

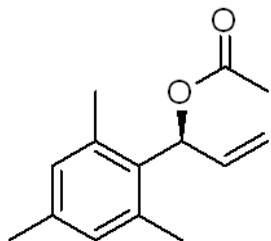

**3ak**

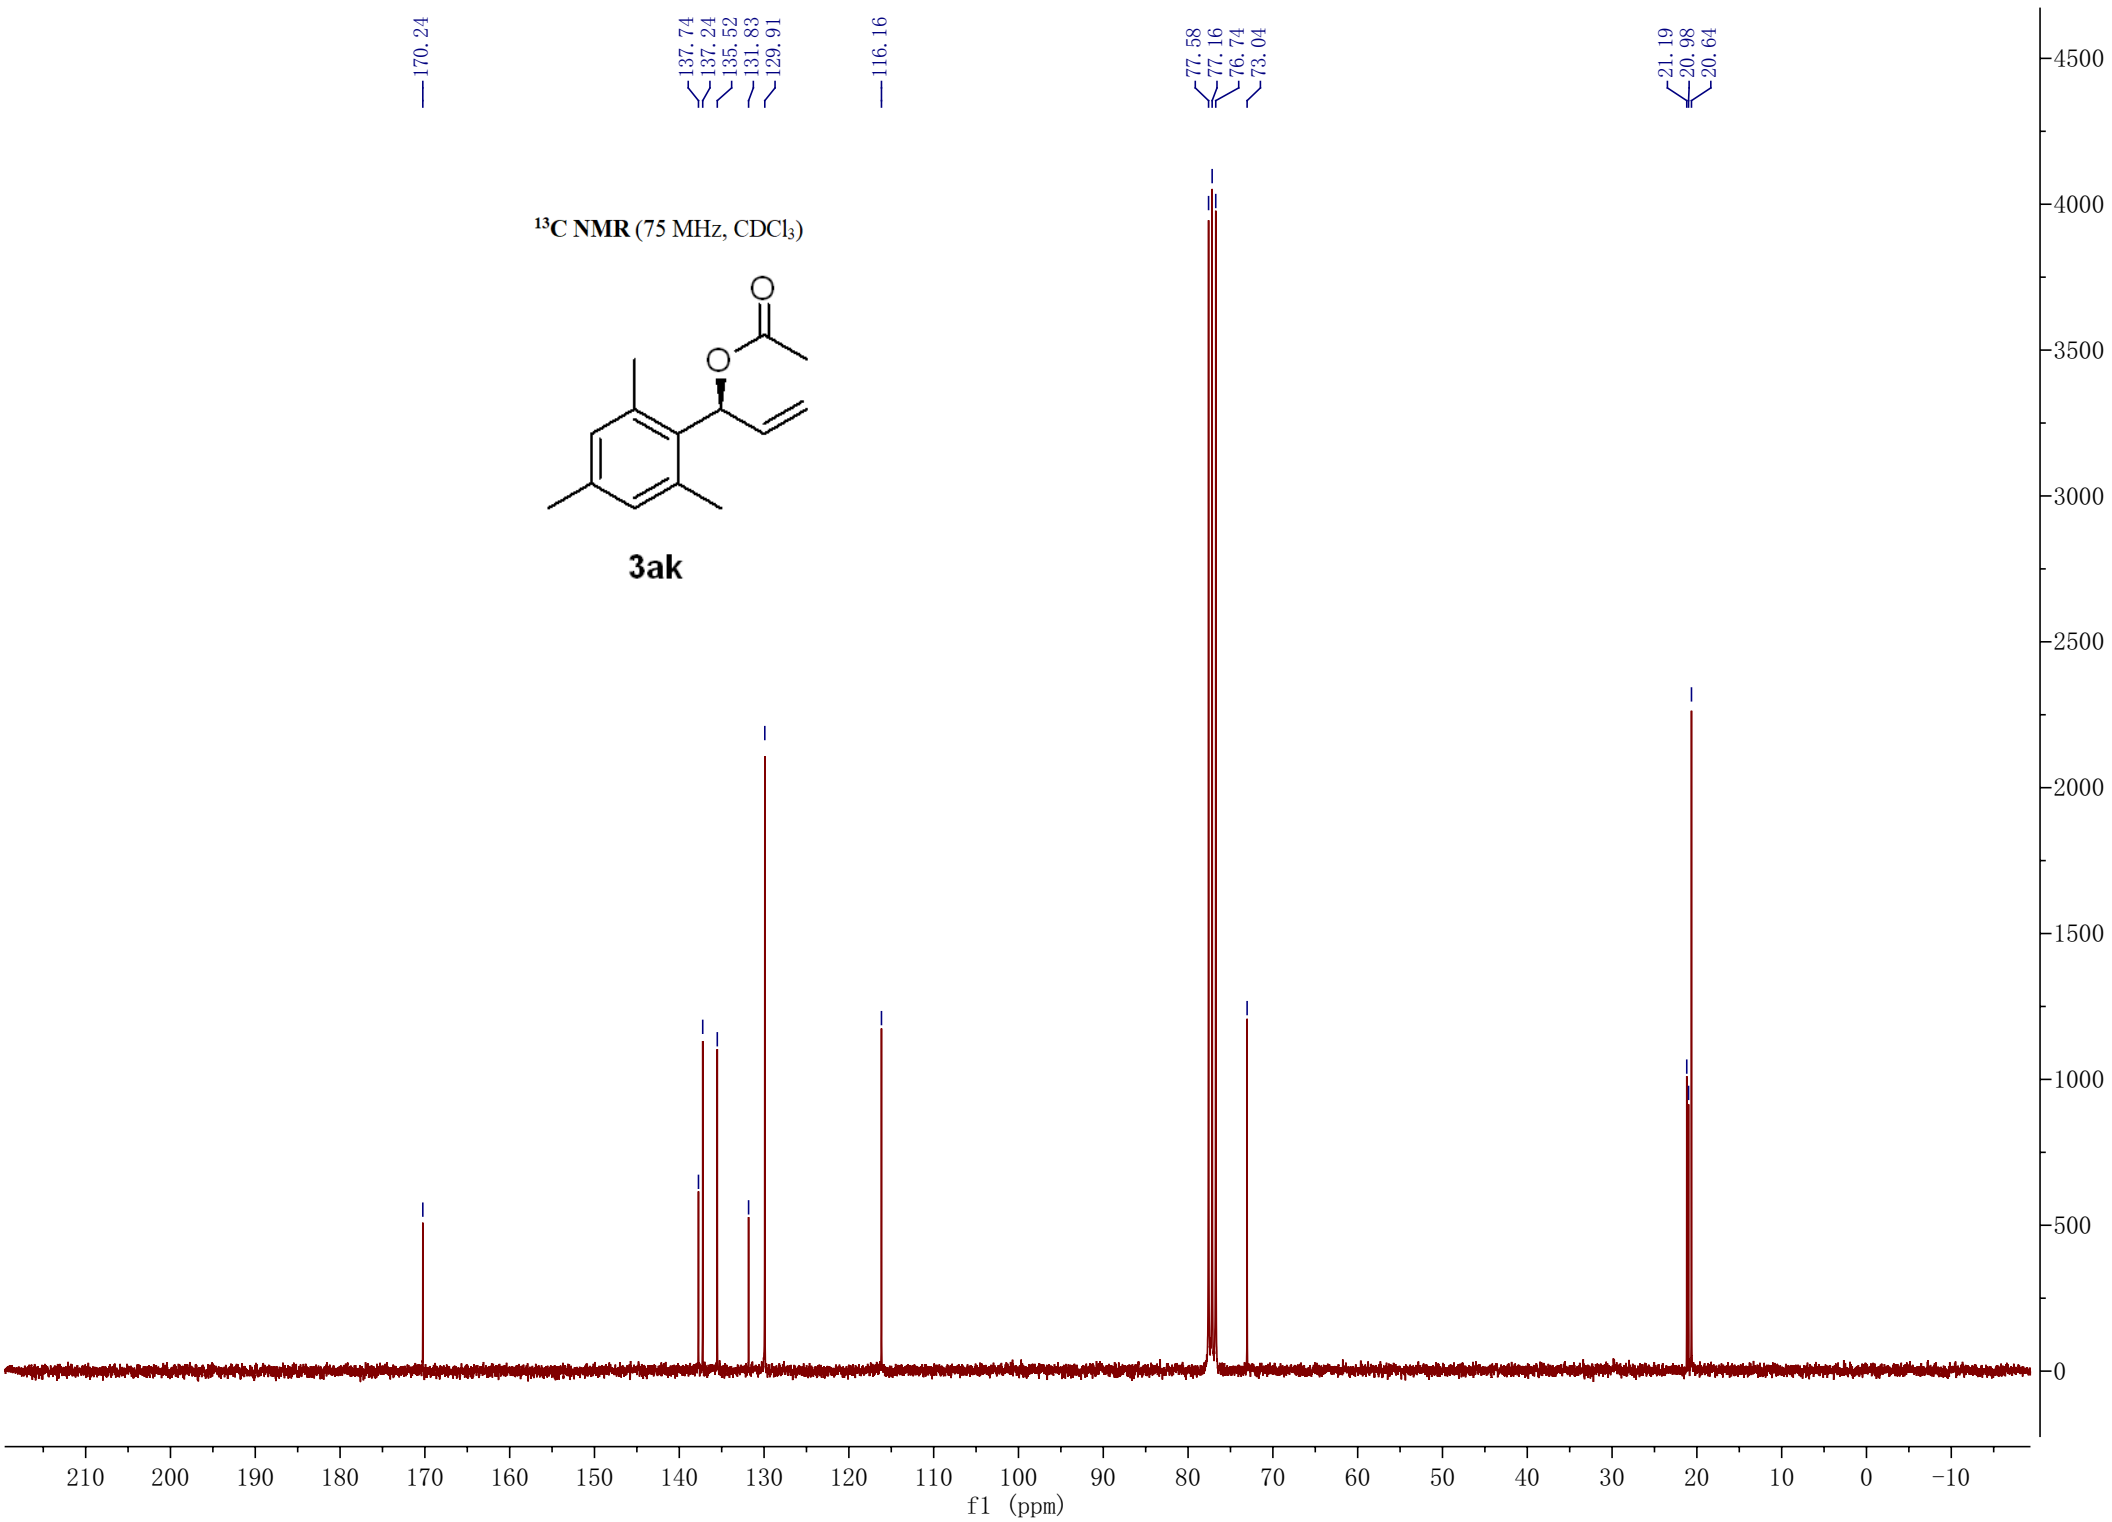

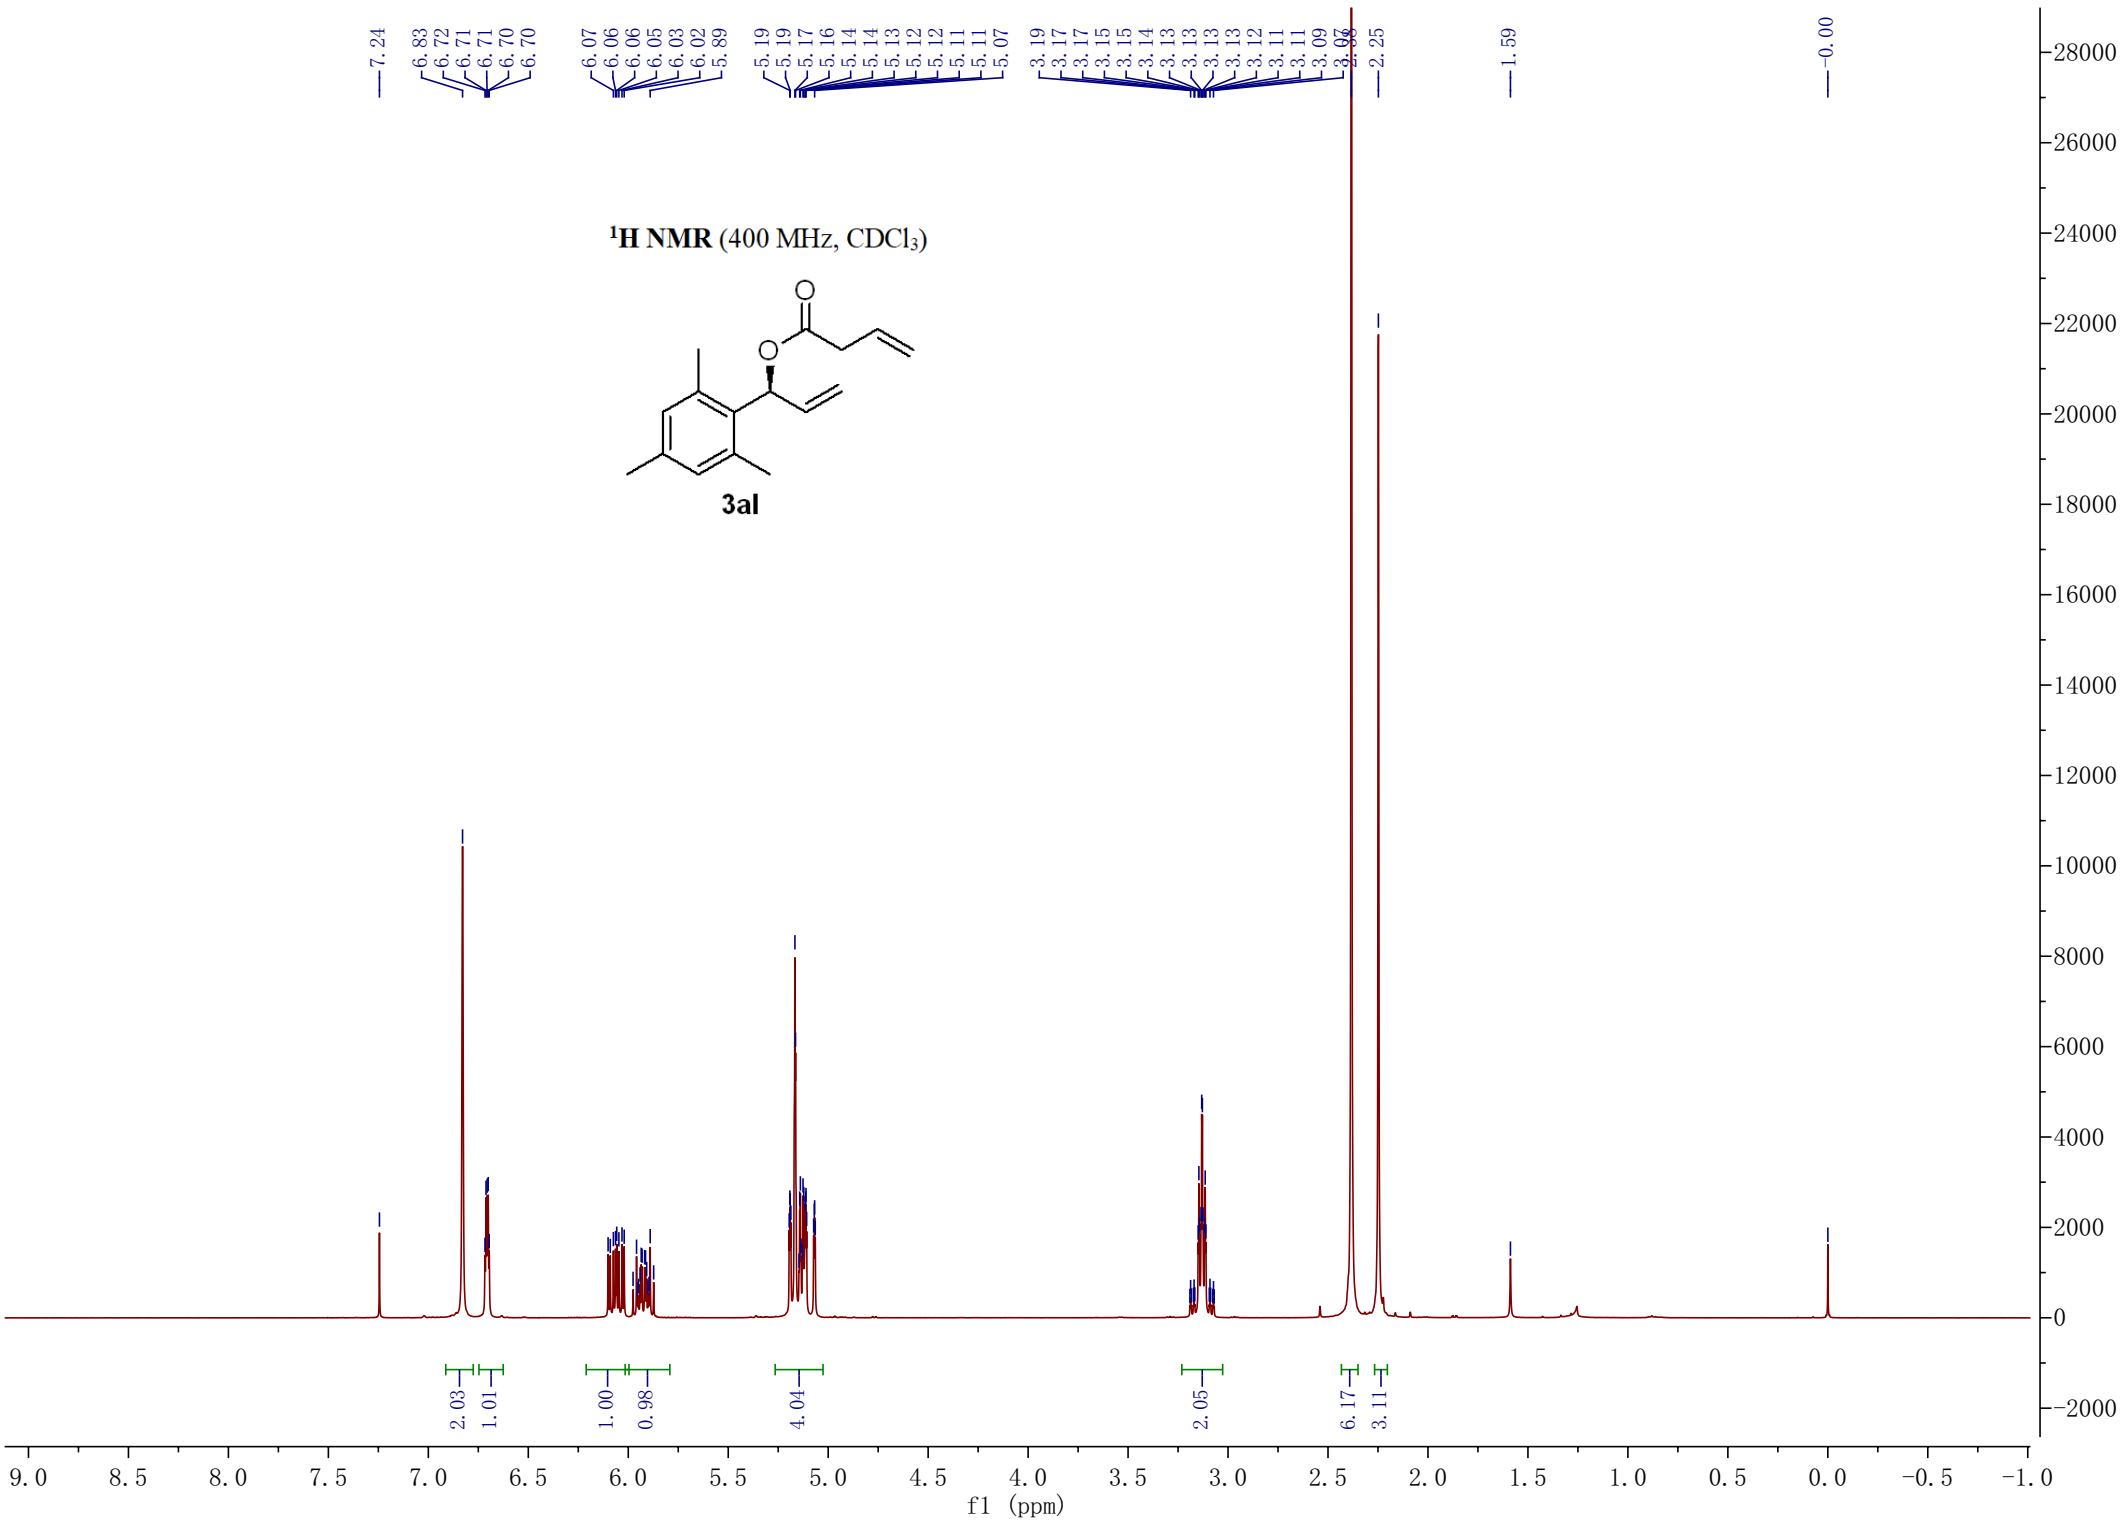



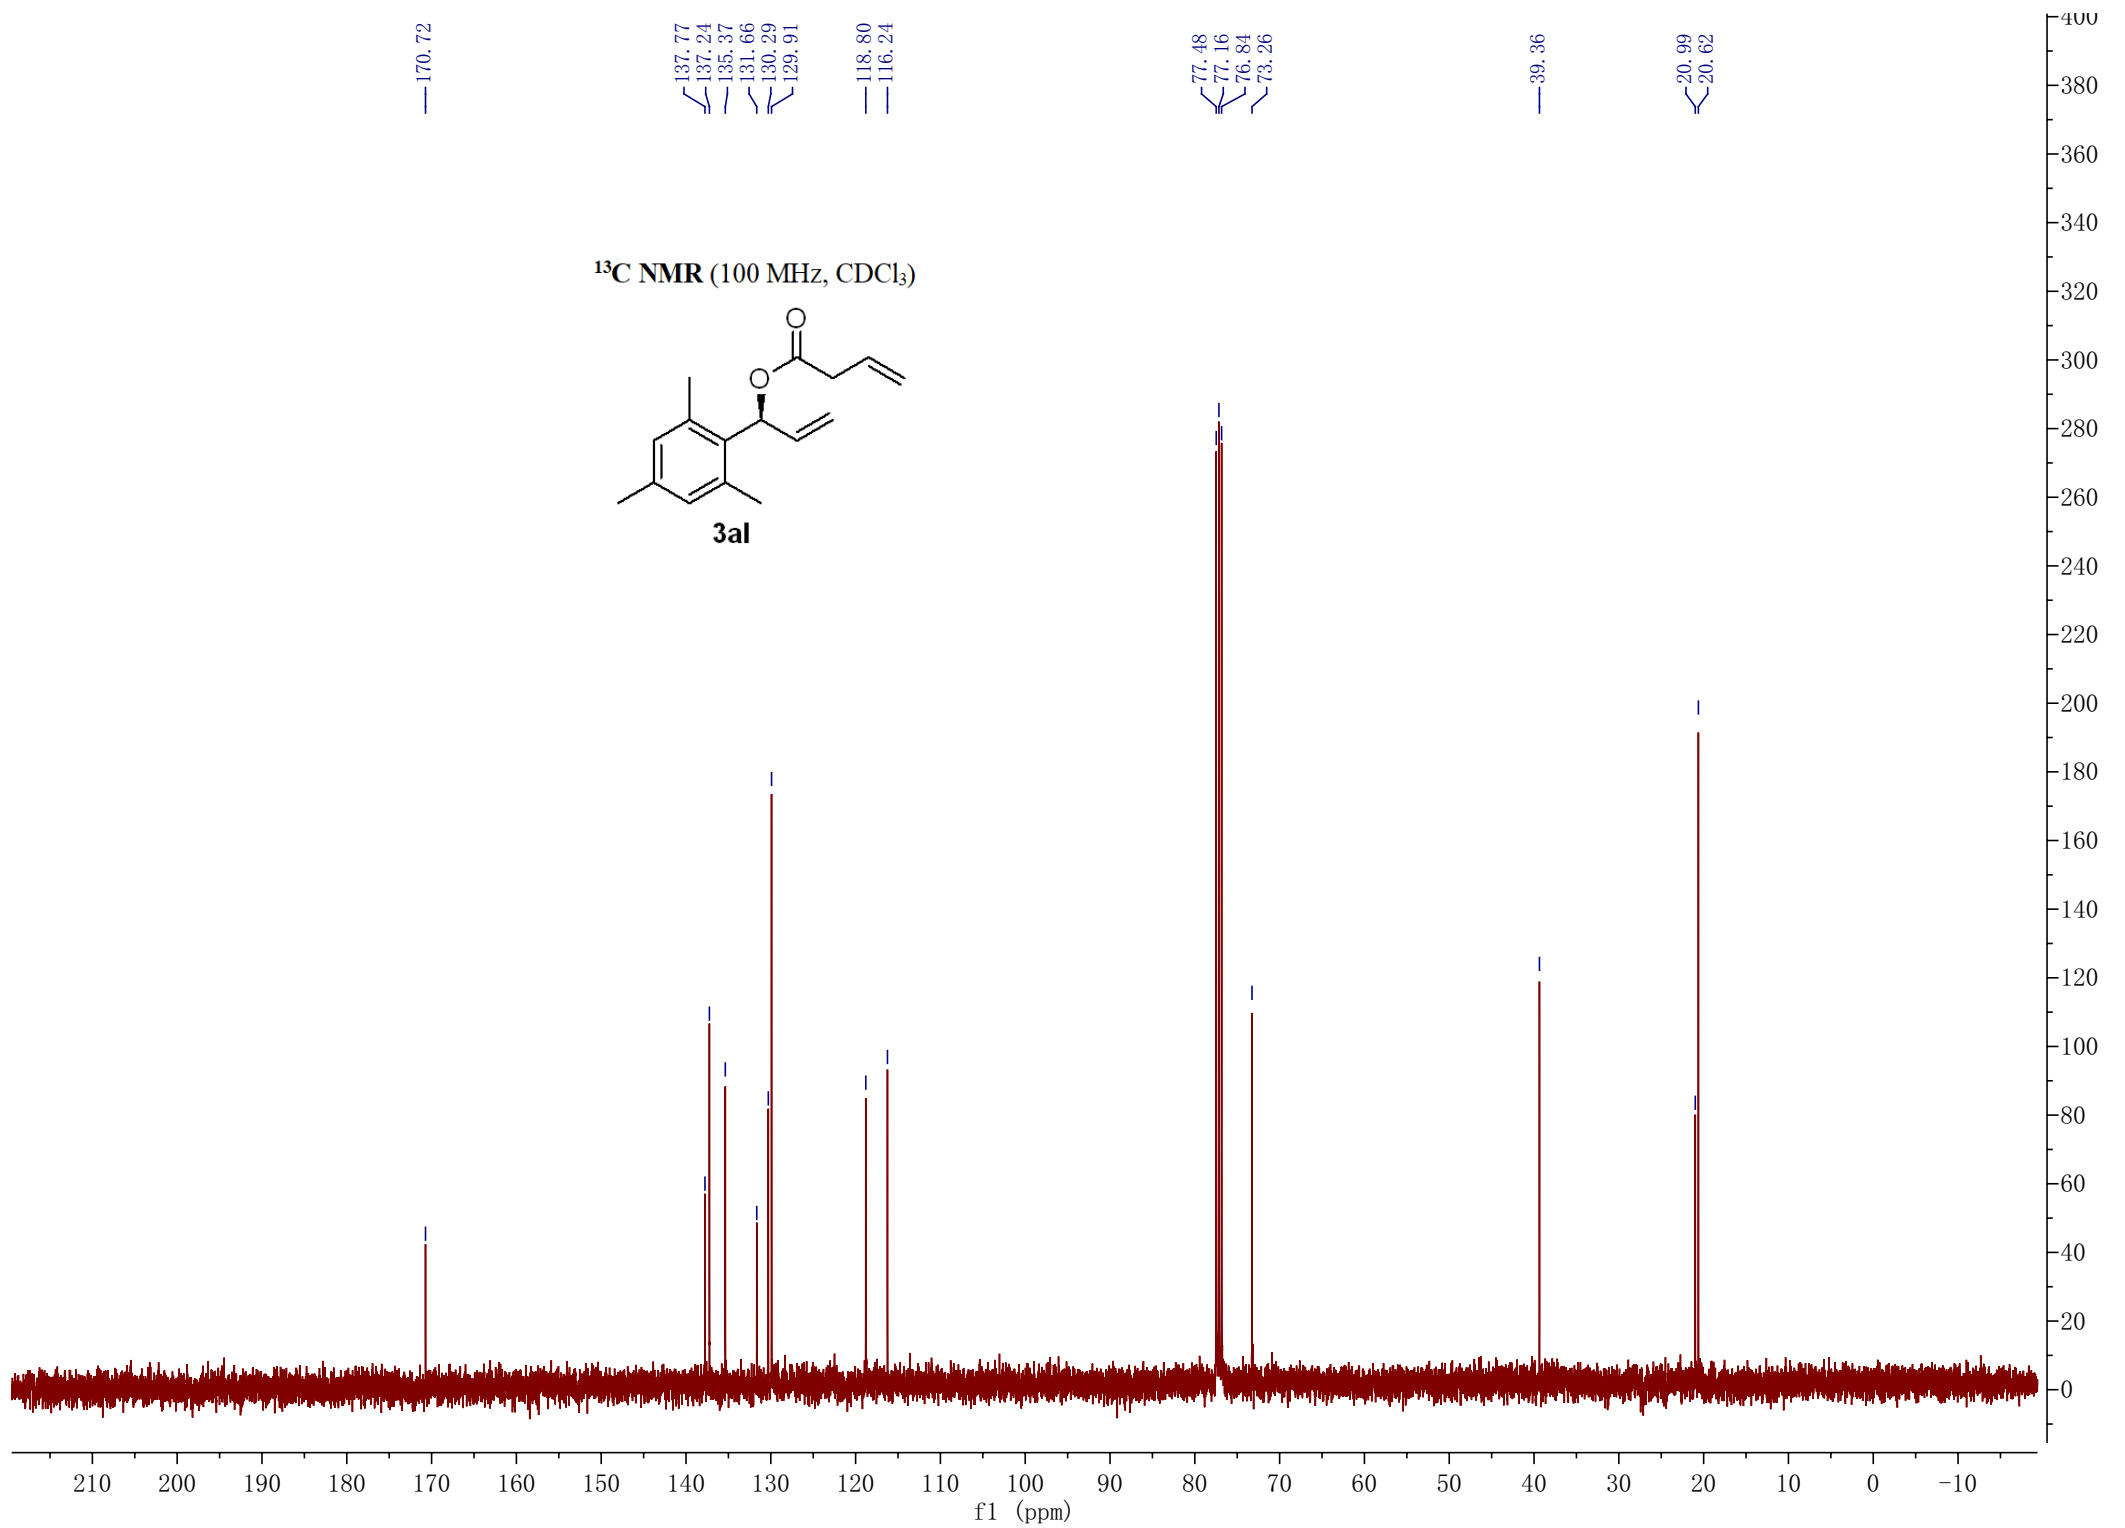

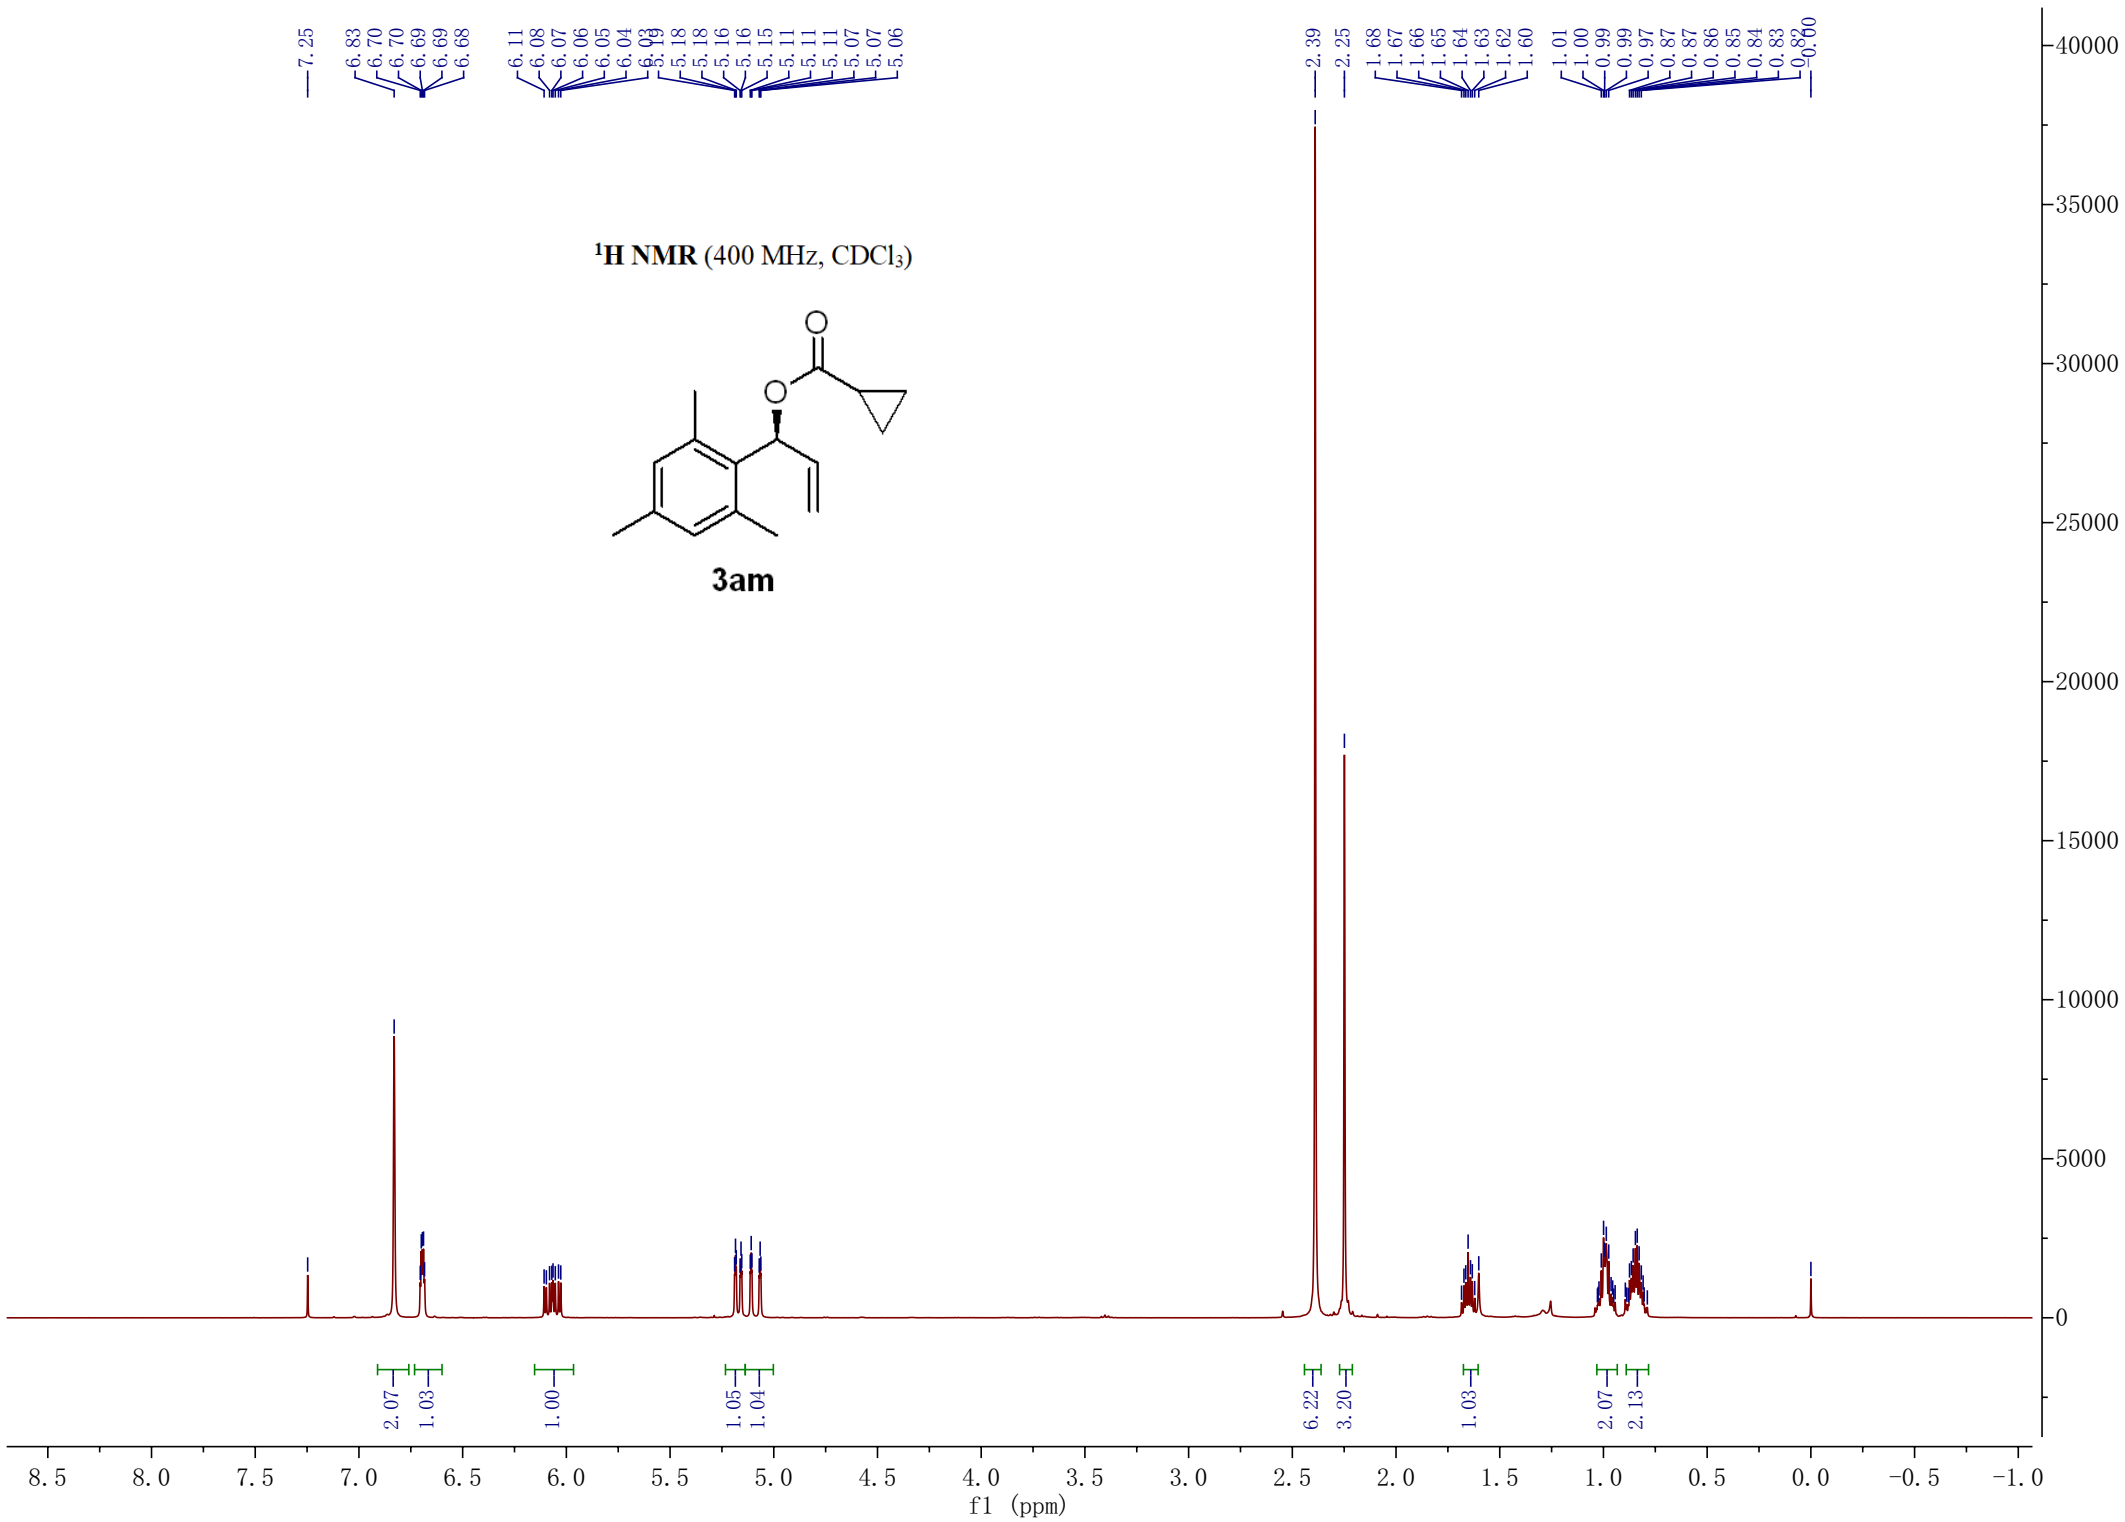

— 174.12

137.63  
137.18  
135.62  
131.88  
129.90

— 116.05

77.48  
77.16  
76.84  
72.96

20.99  
20.64

13.15  
8.62  
8.57

<sup>13</sup>C NMR (100 MHz, CDCl<sub>3</sub>)

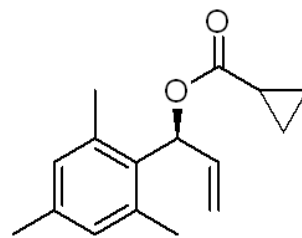

**3am**

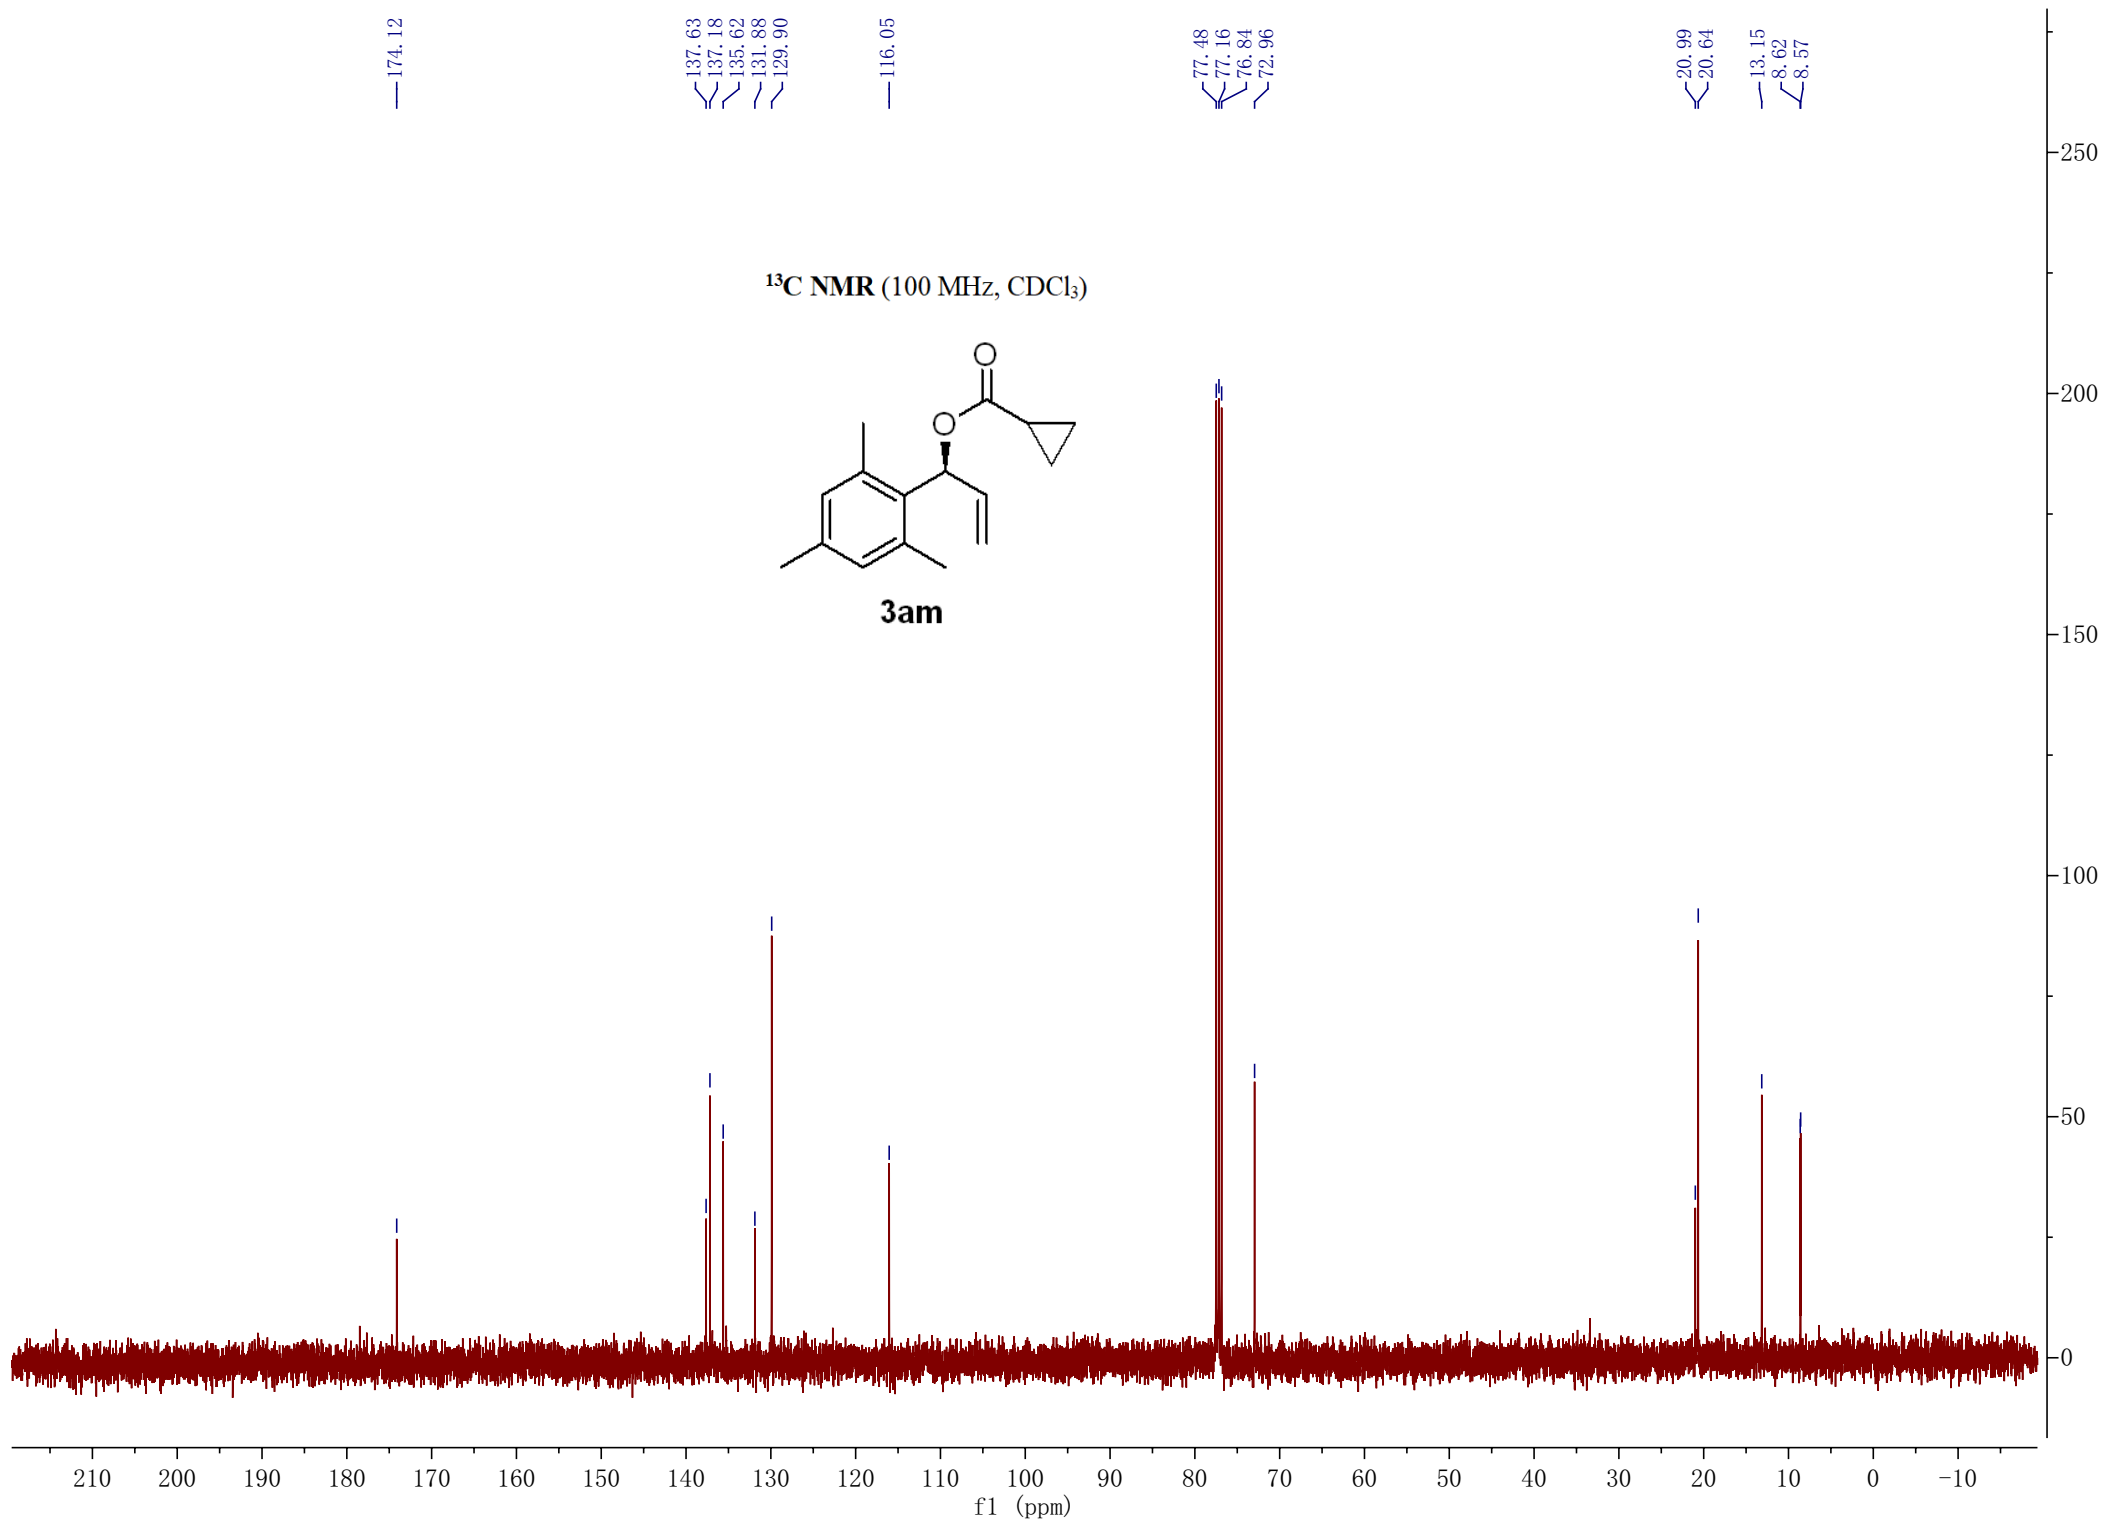

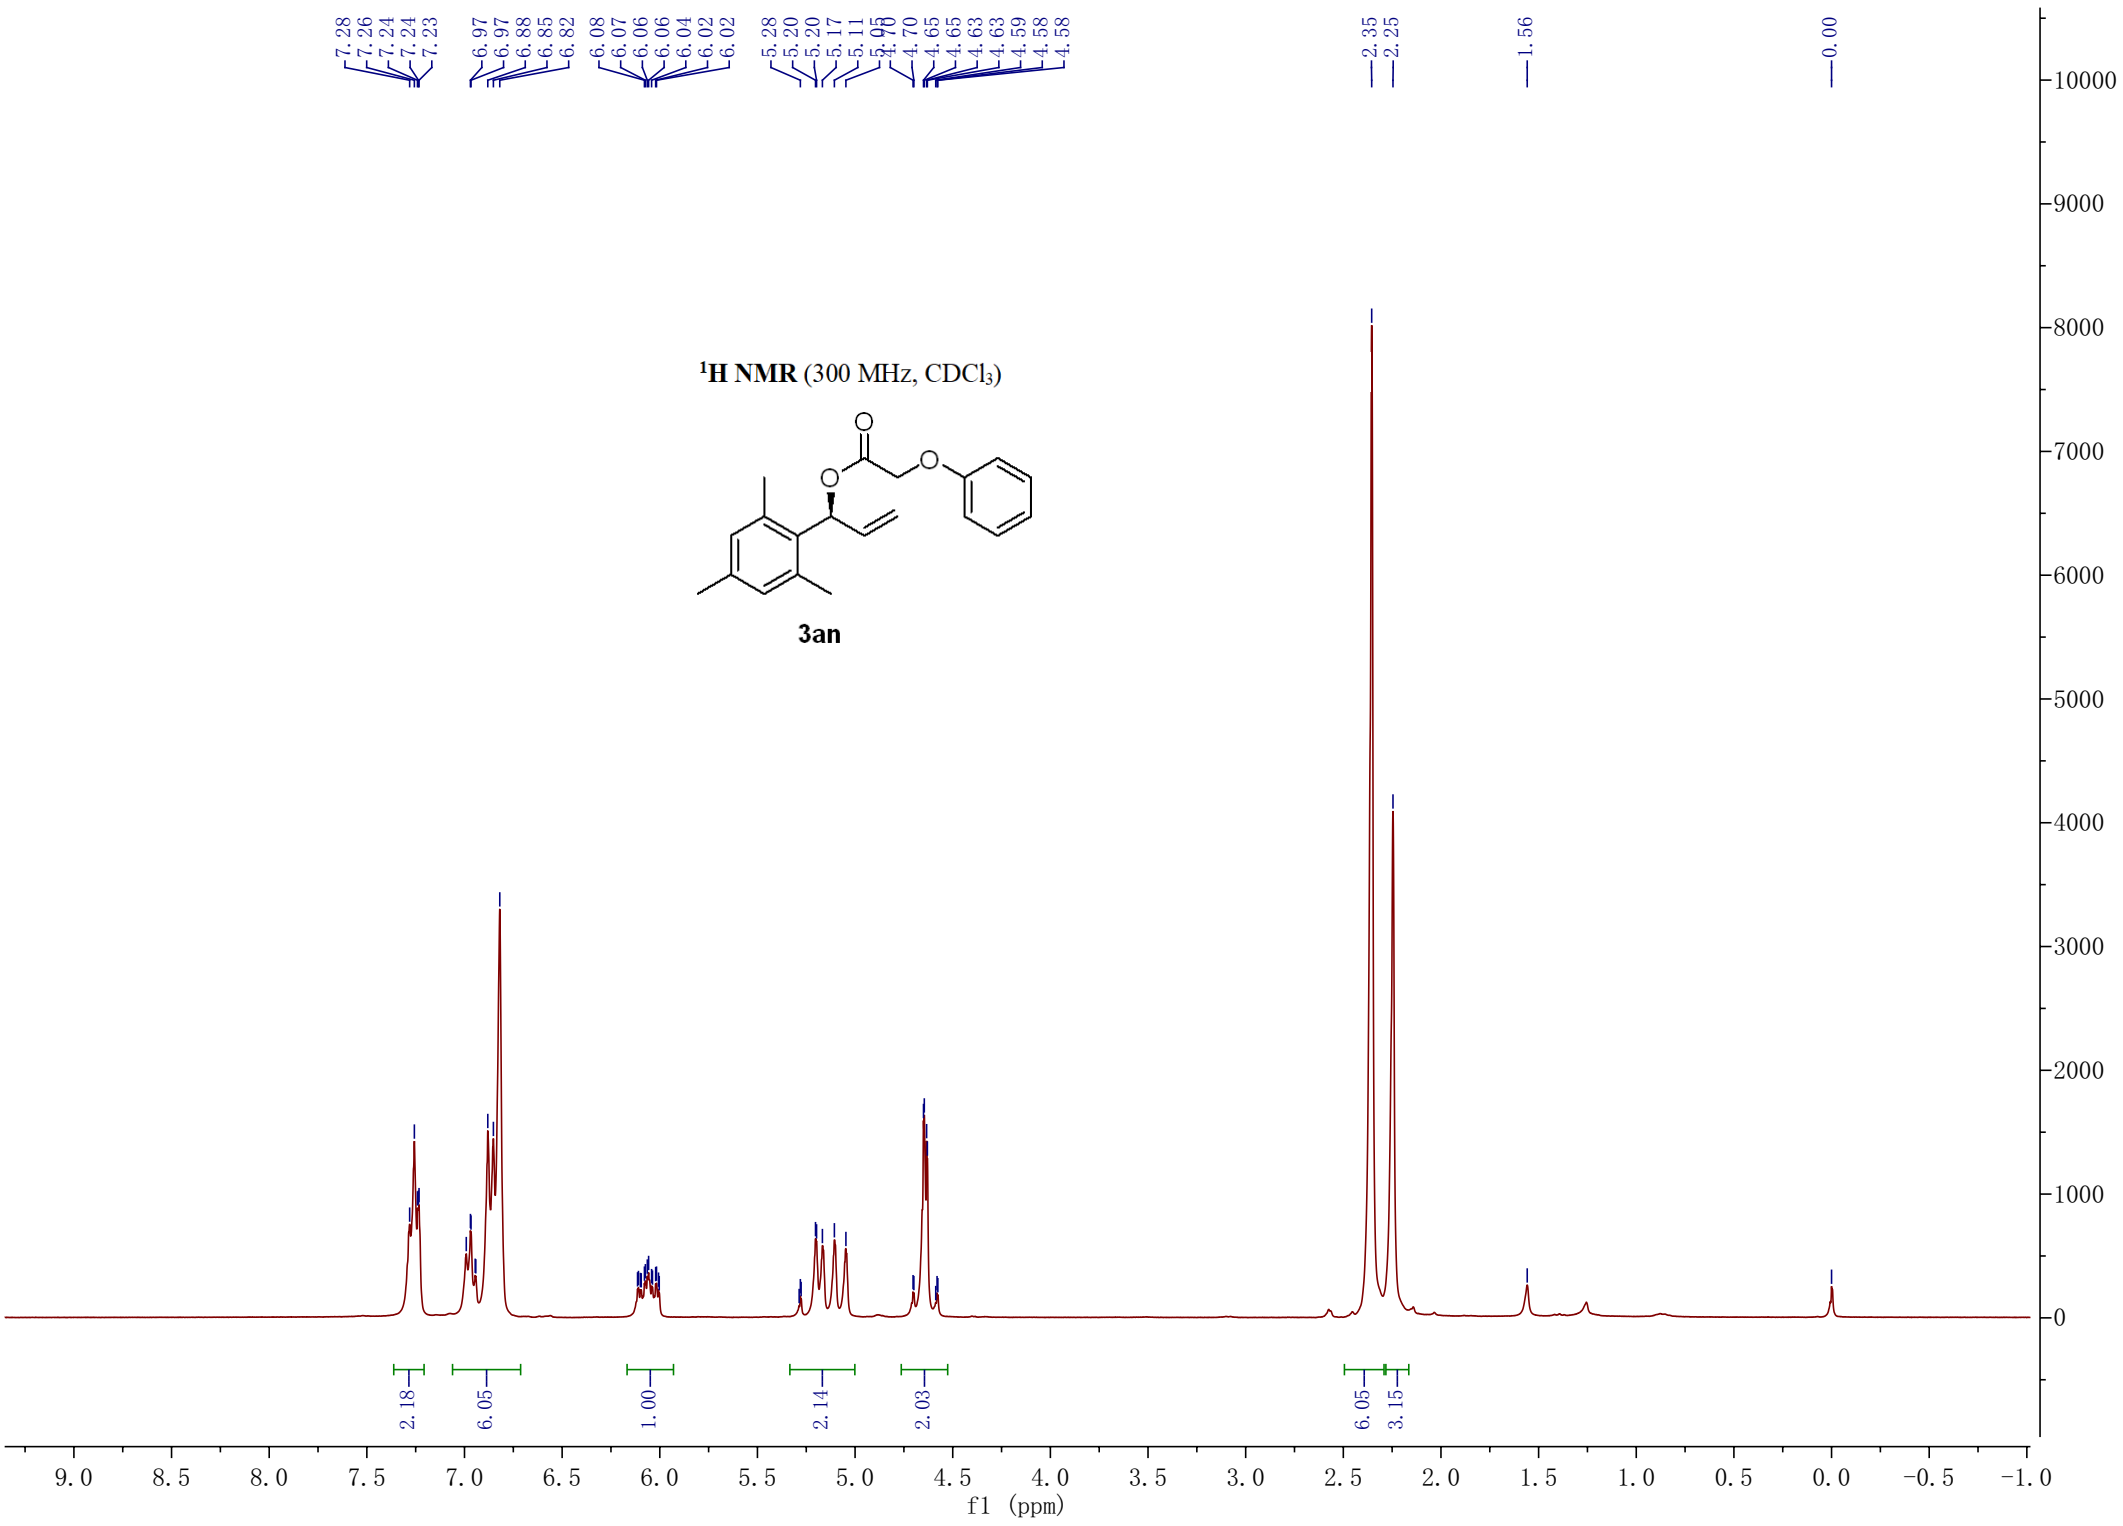

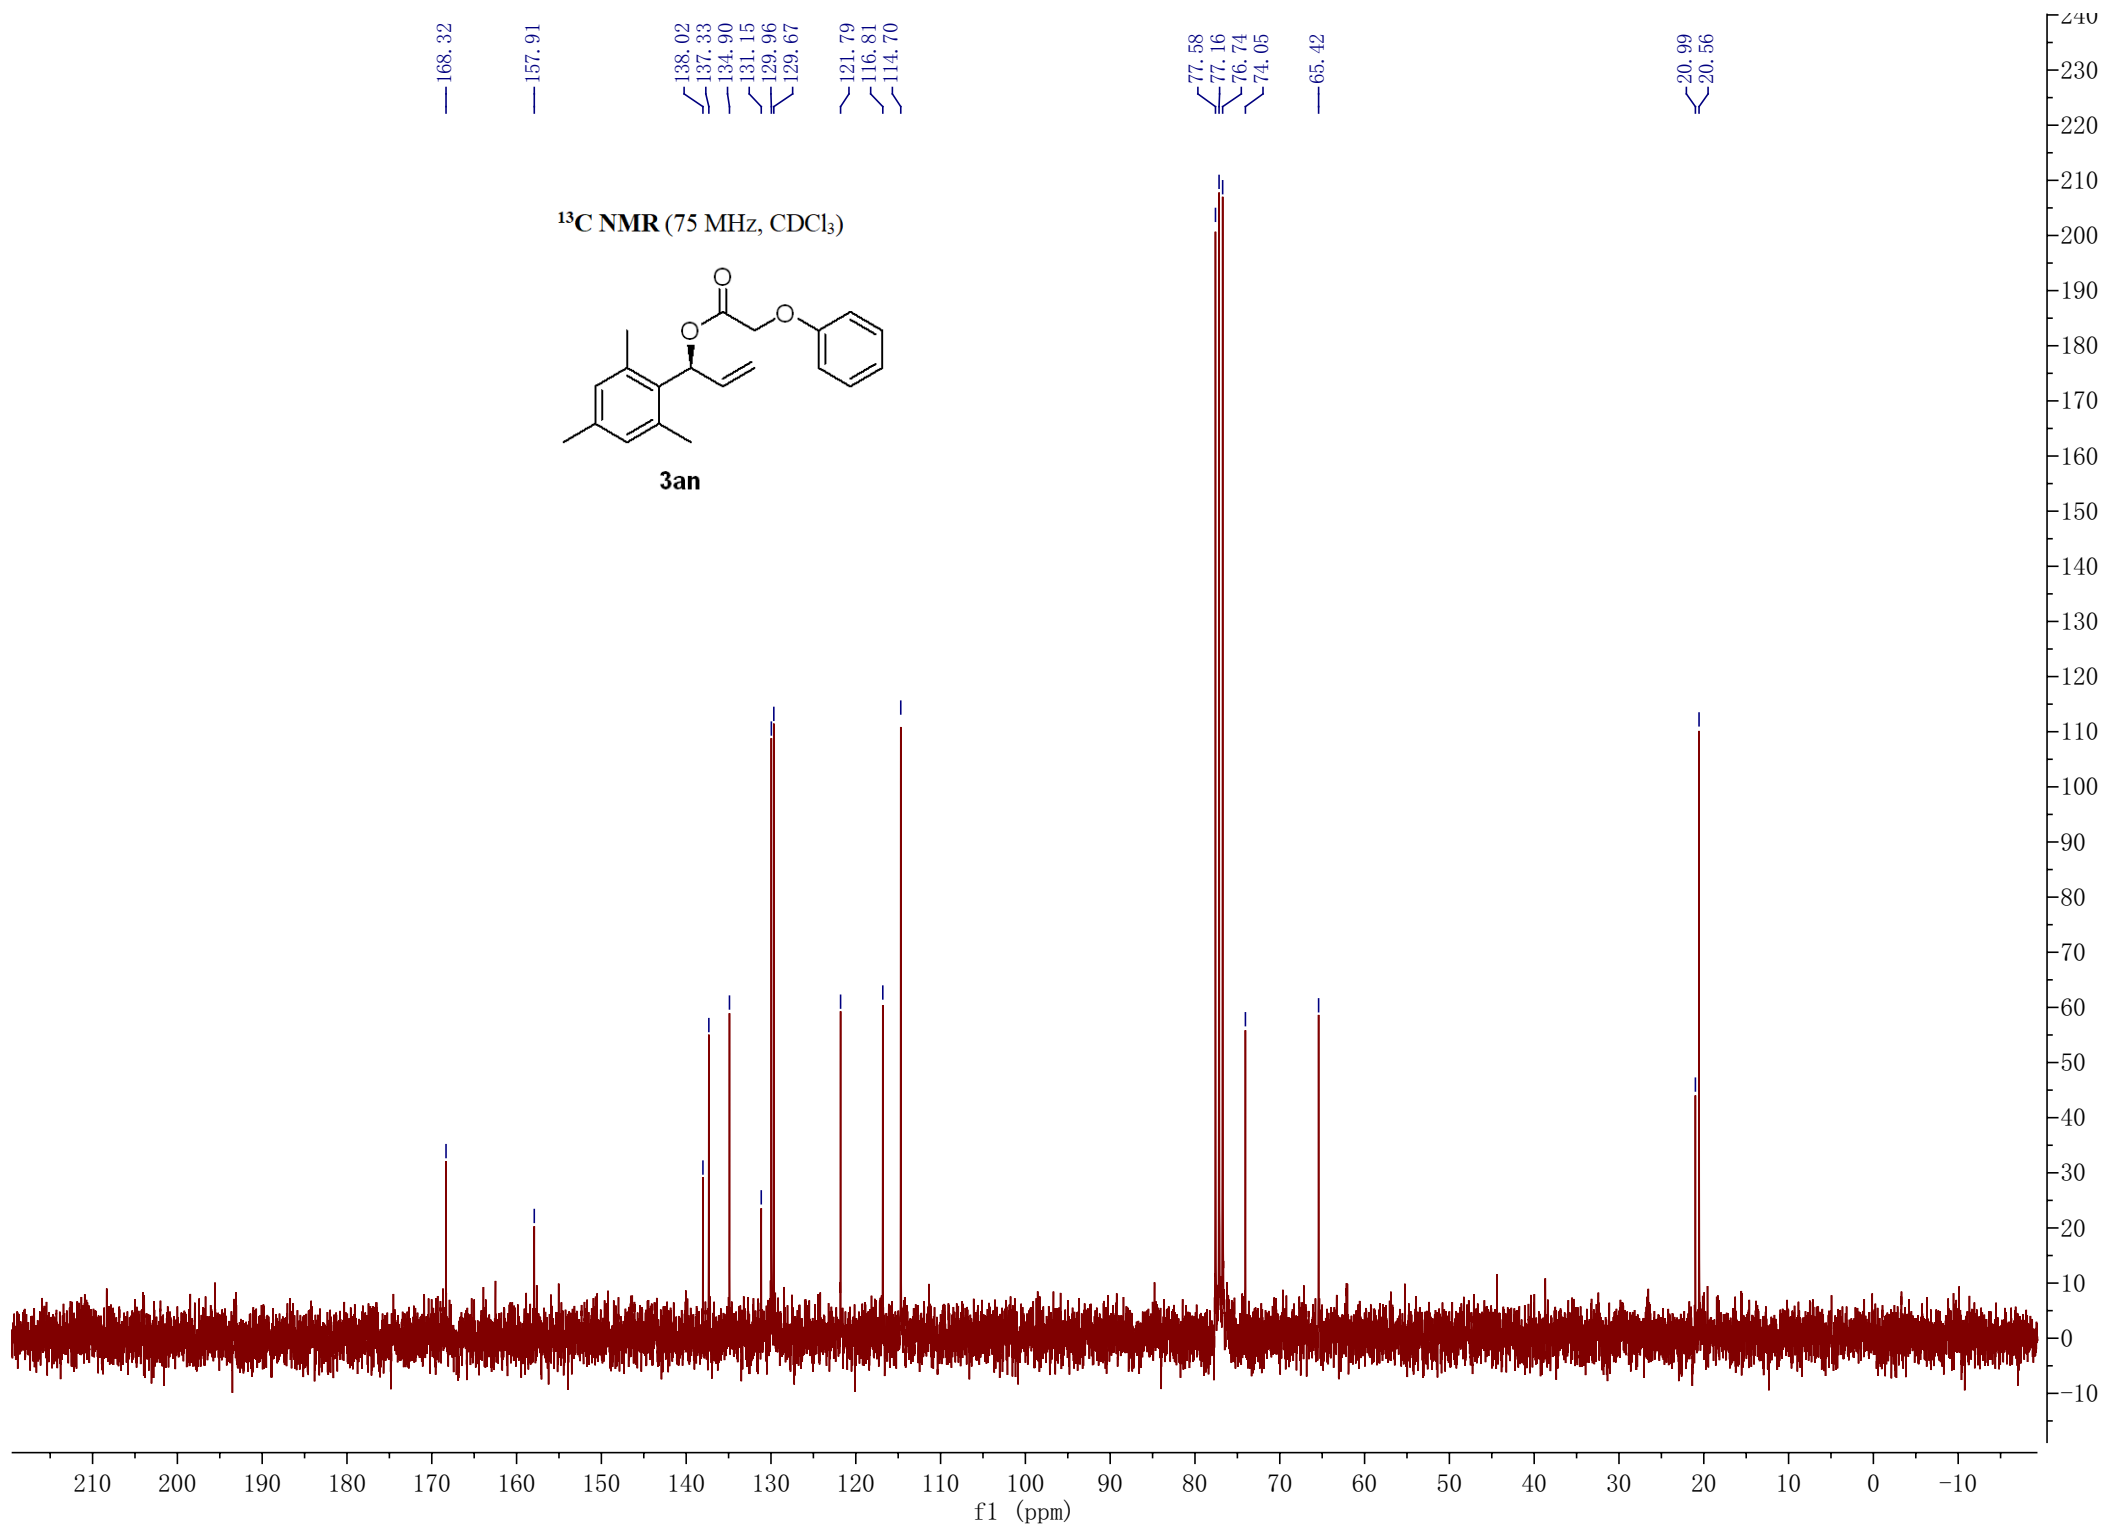

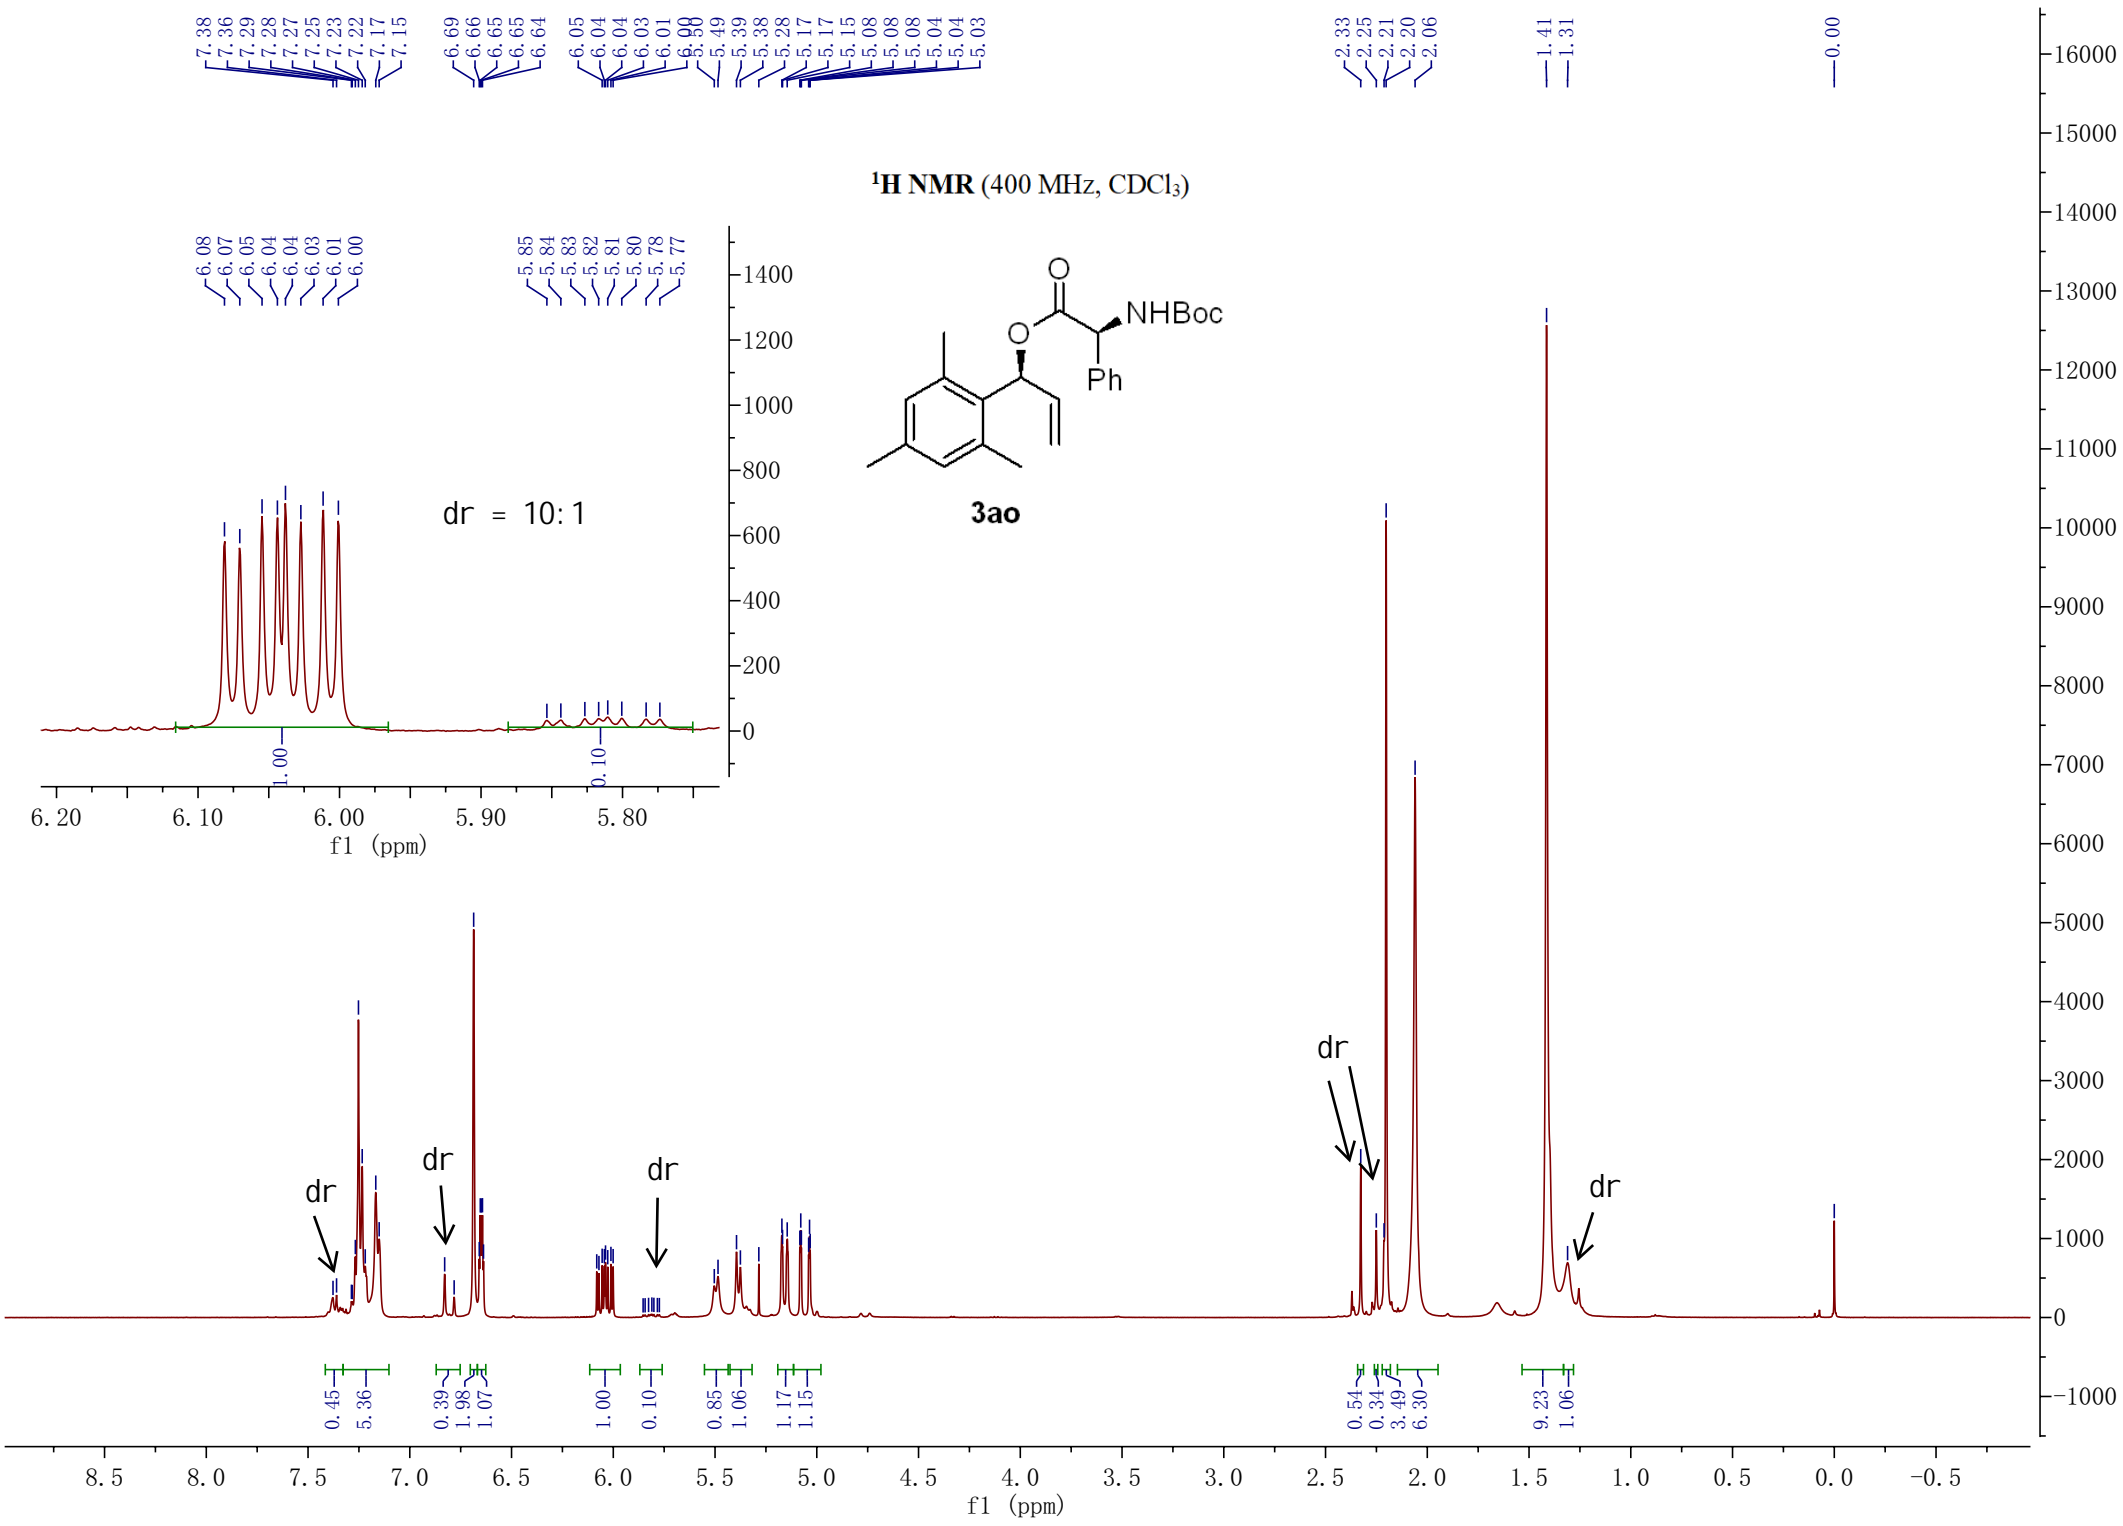

<sup>13</sup>C NMR (100 MHz, CDCl<sub>3</sub>)

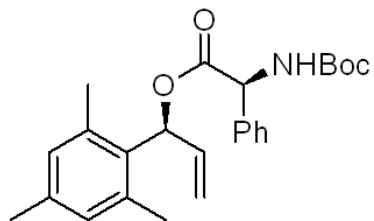

**3ao**

dr = 10:1

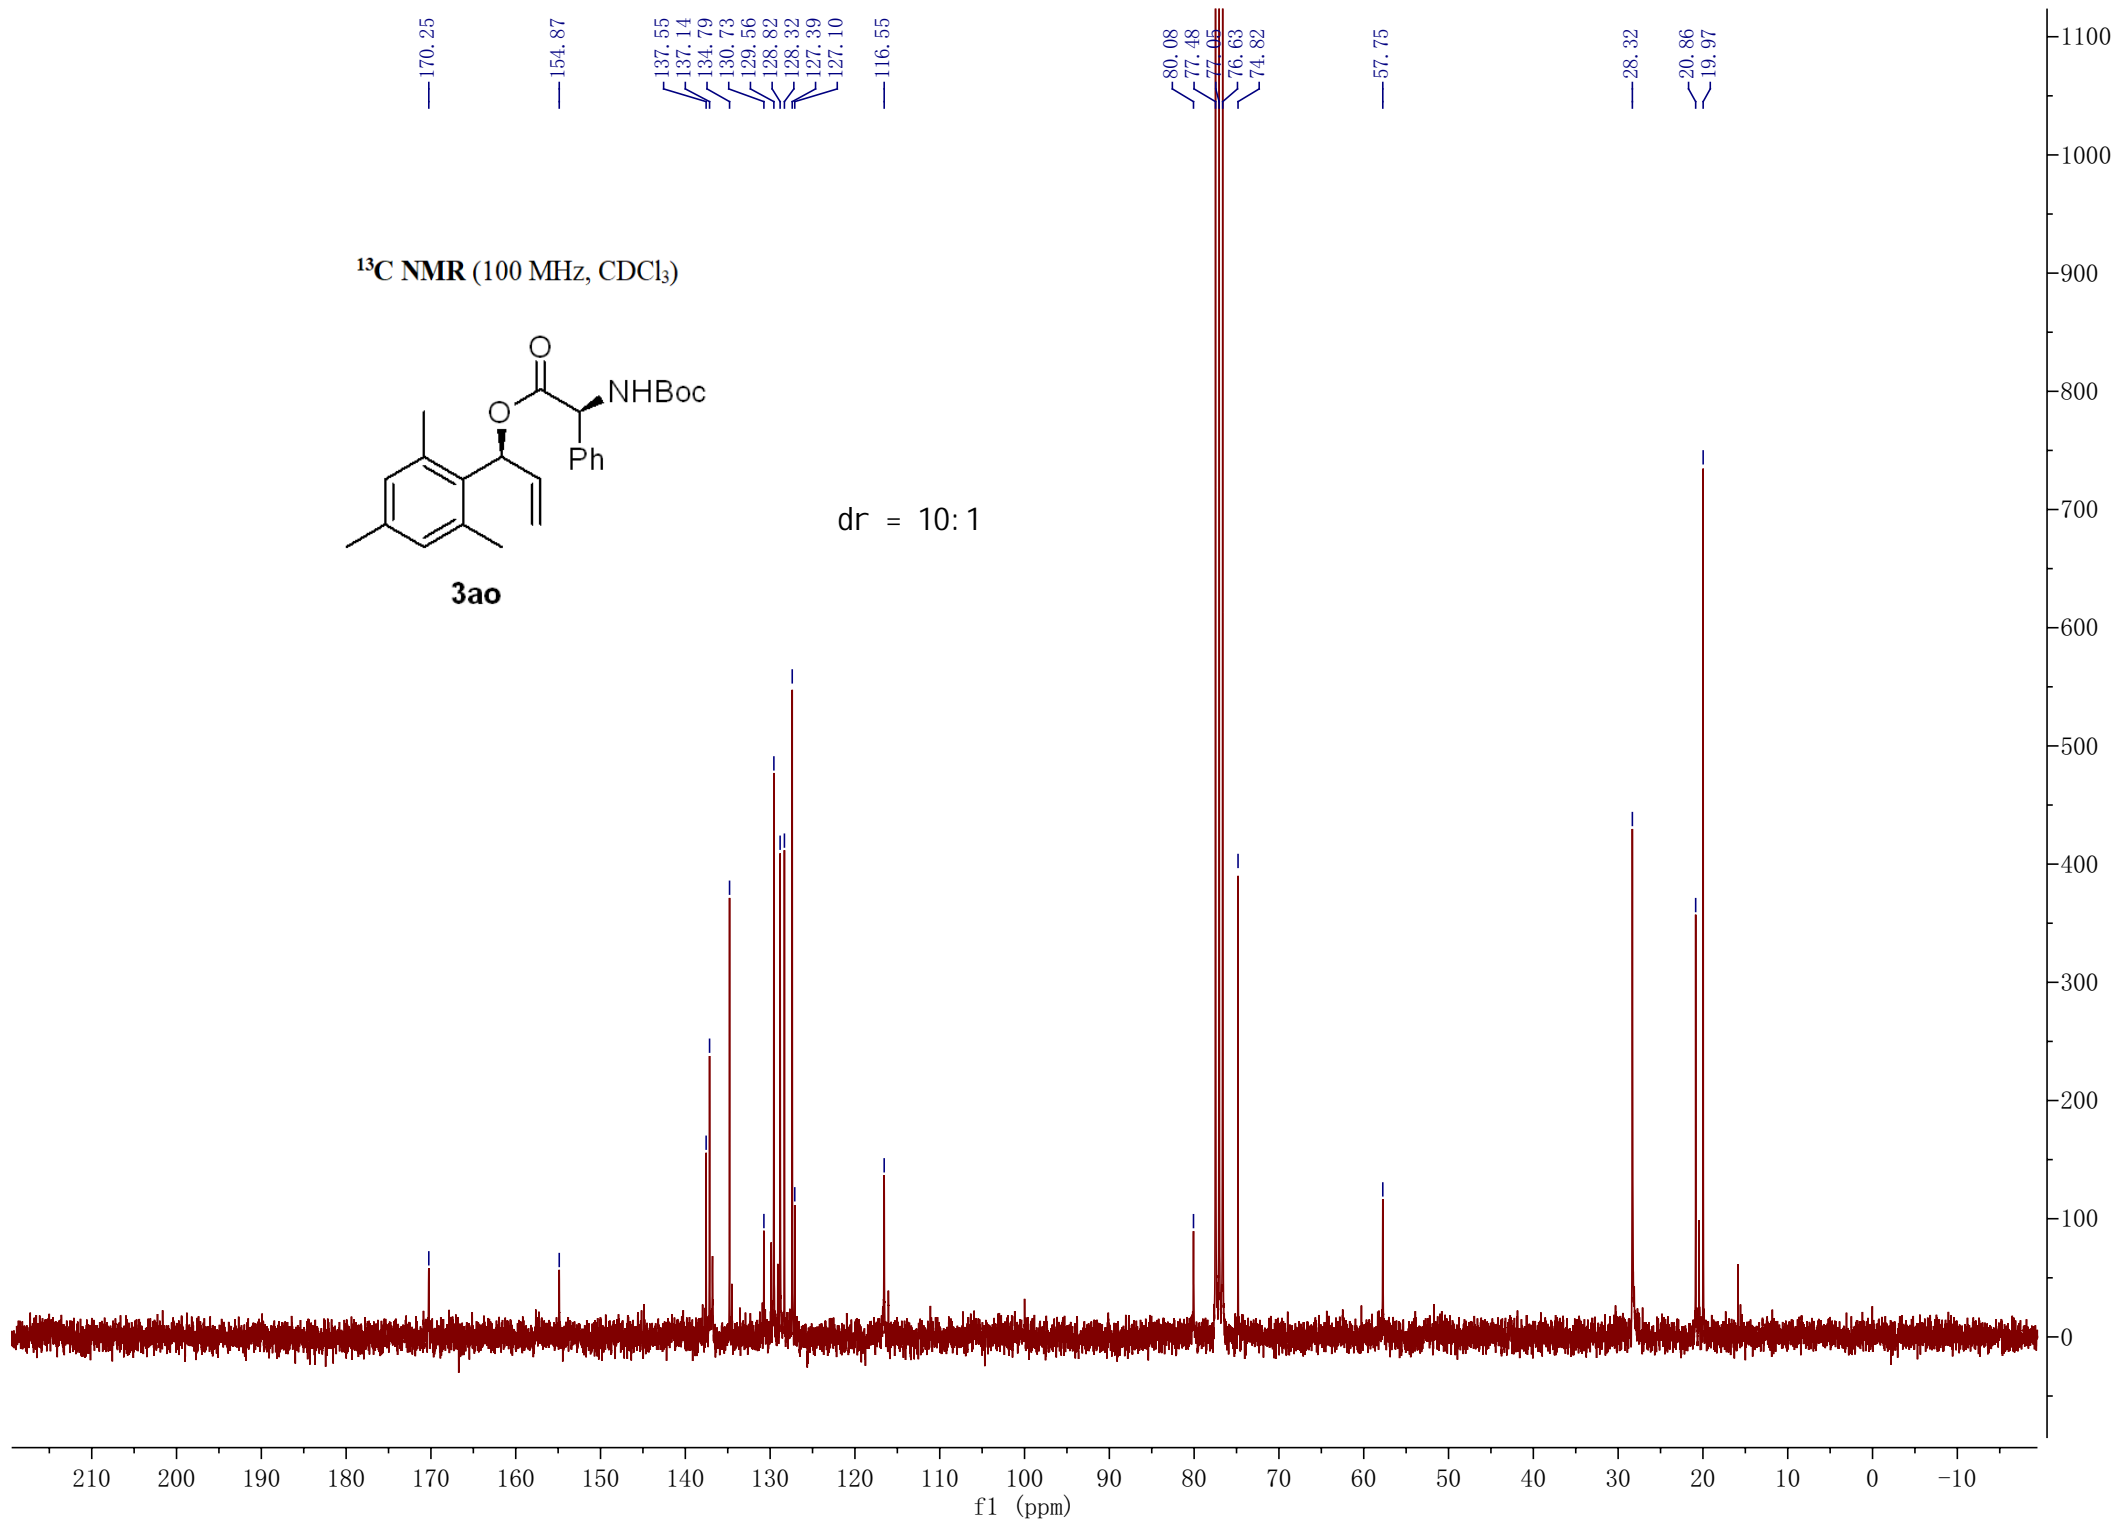

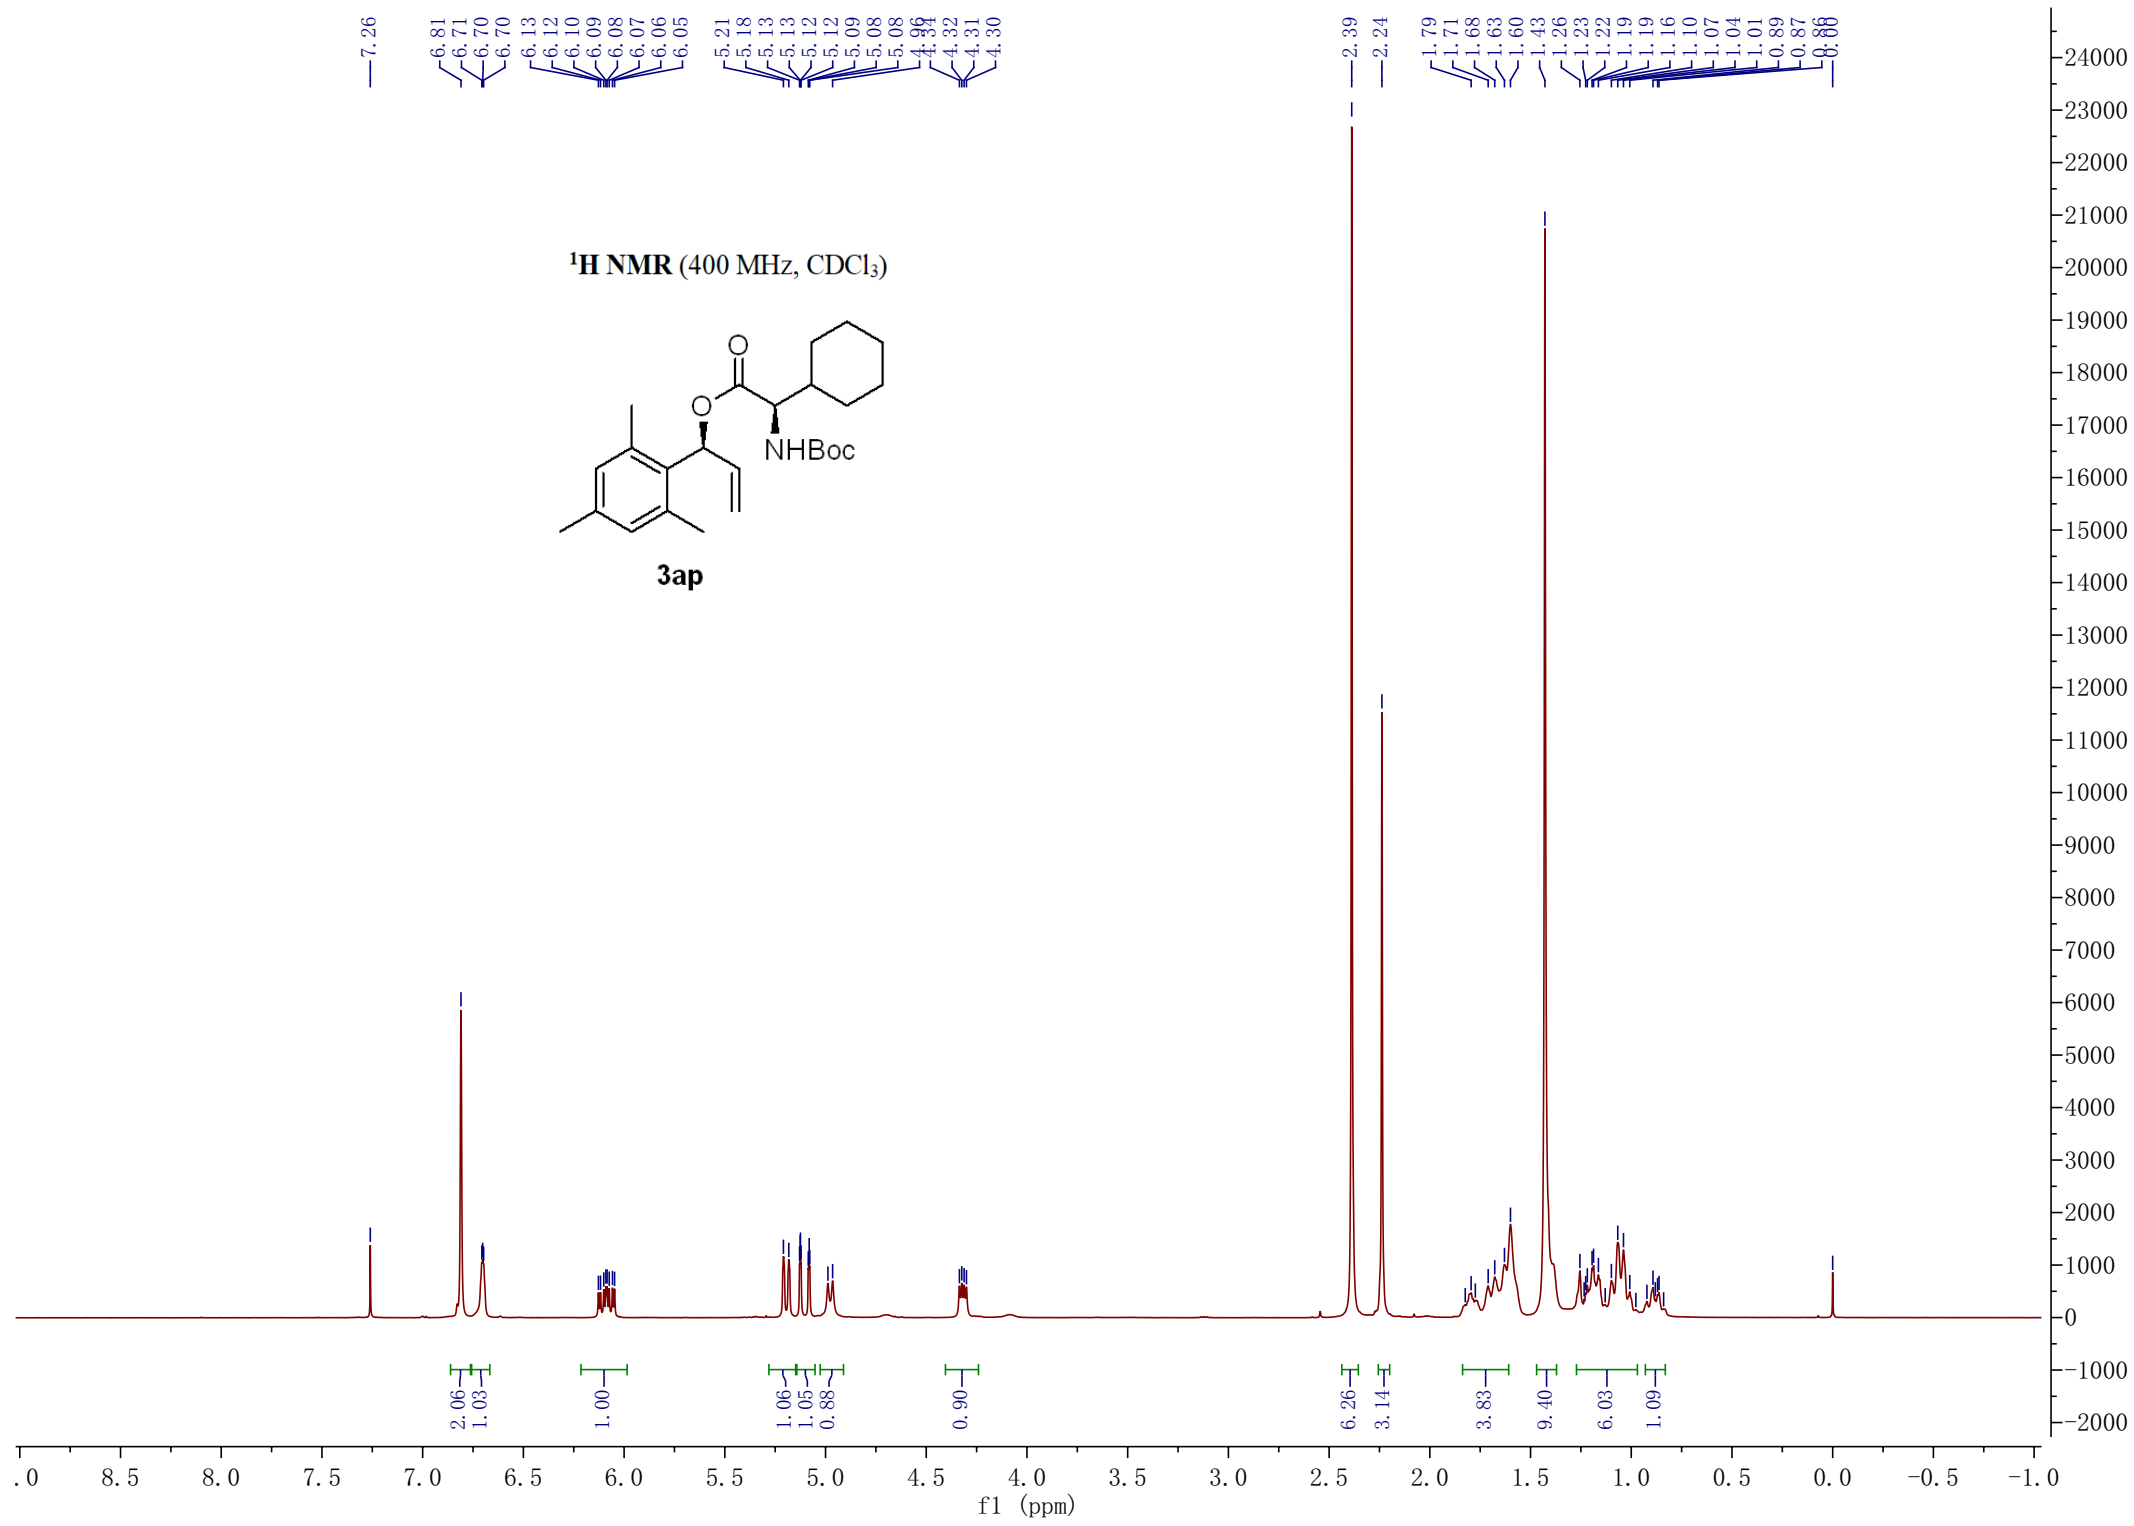



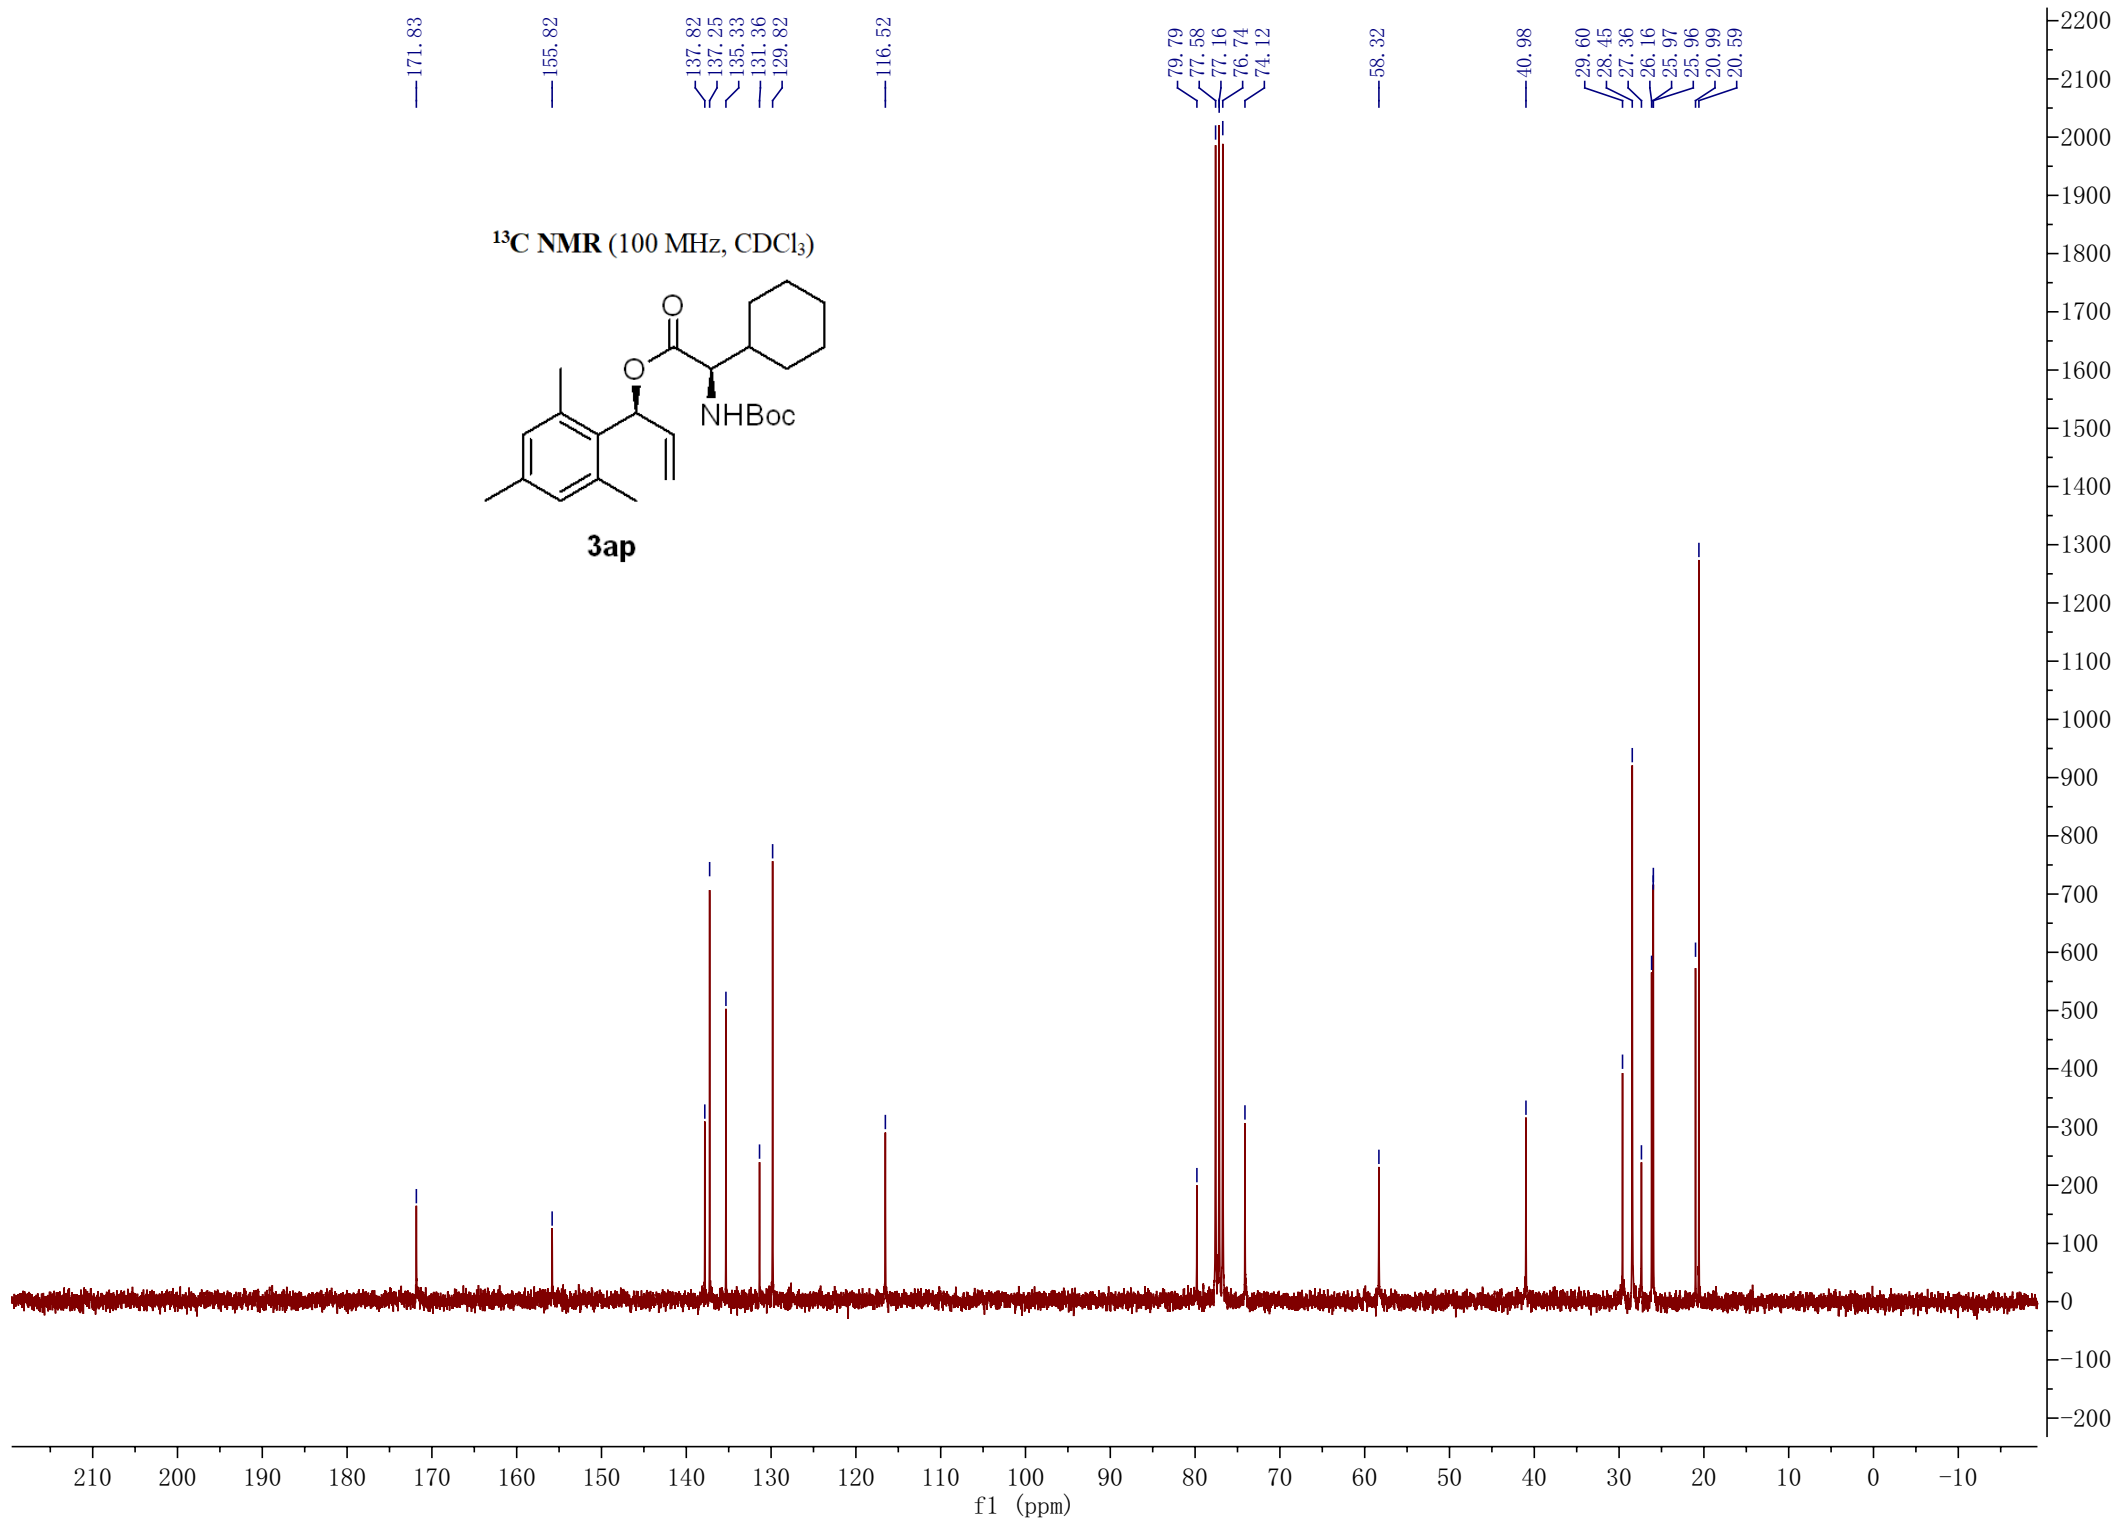

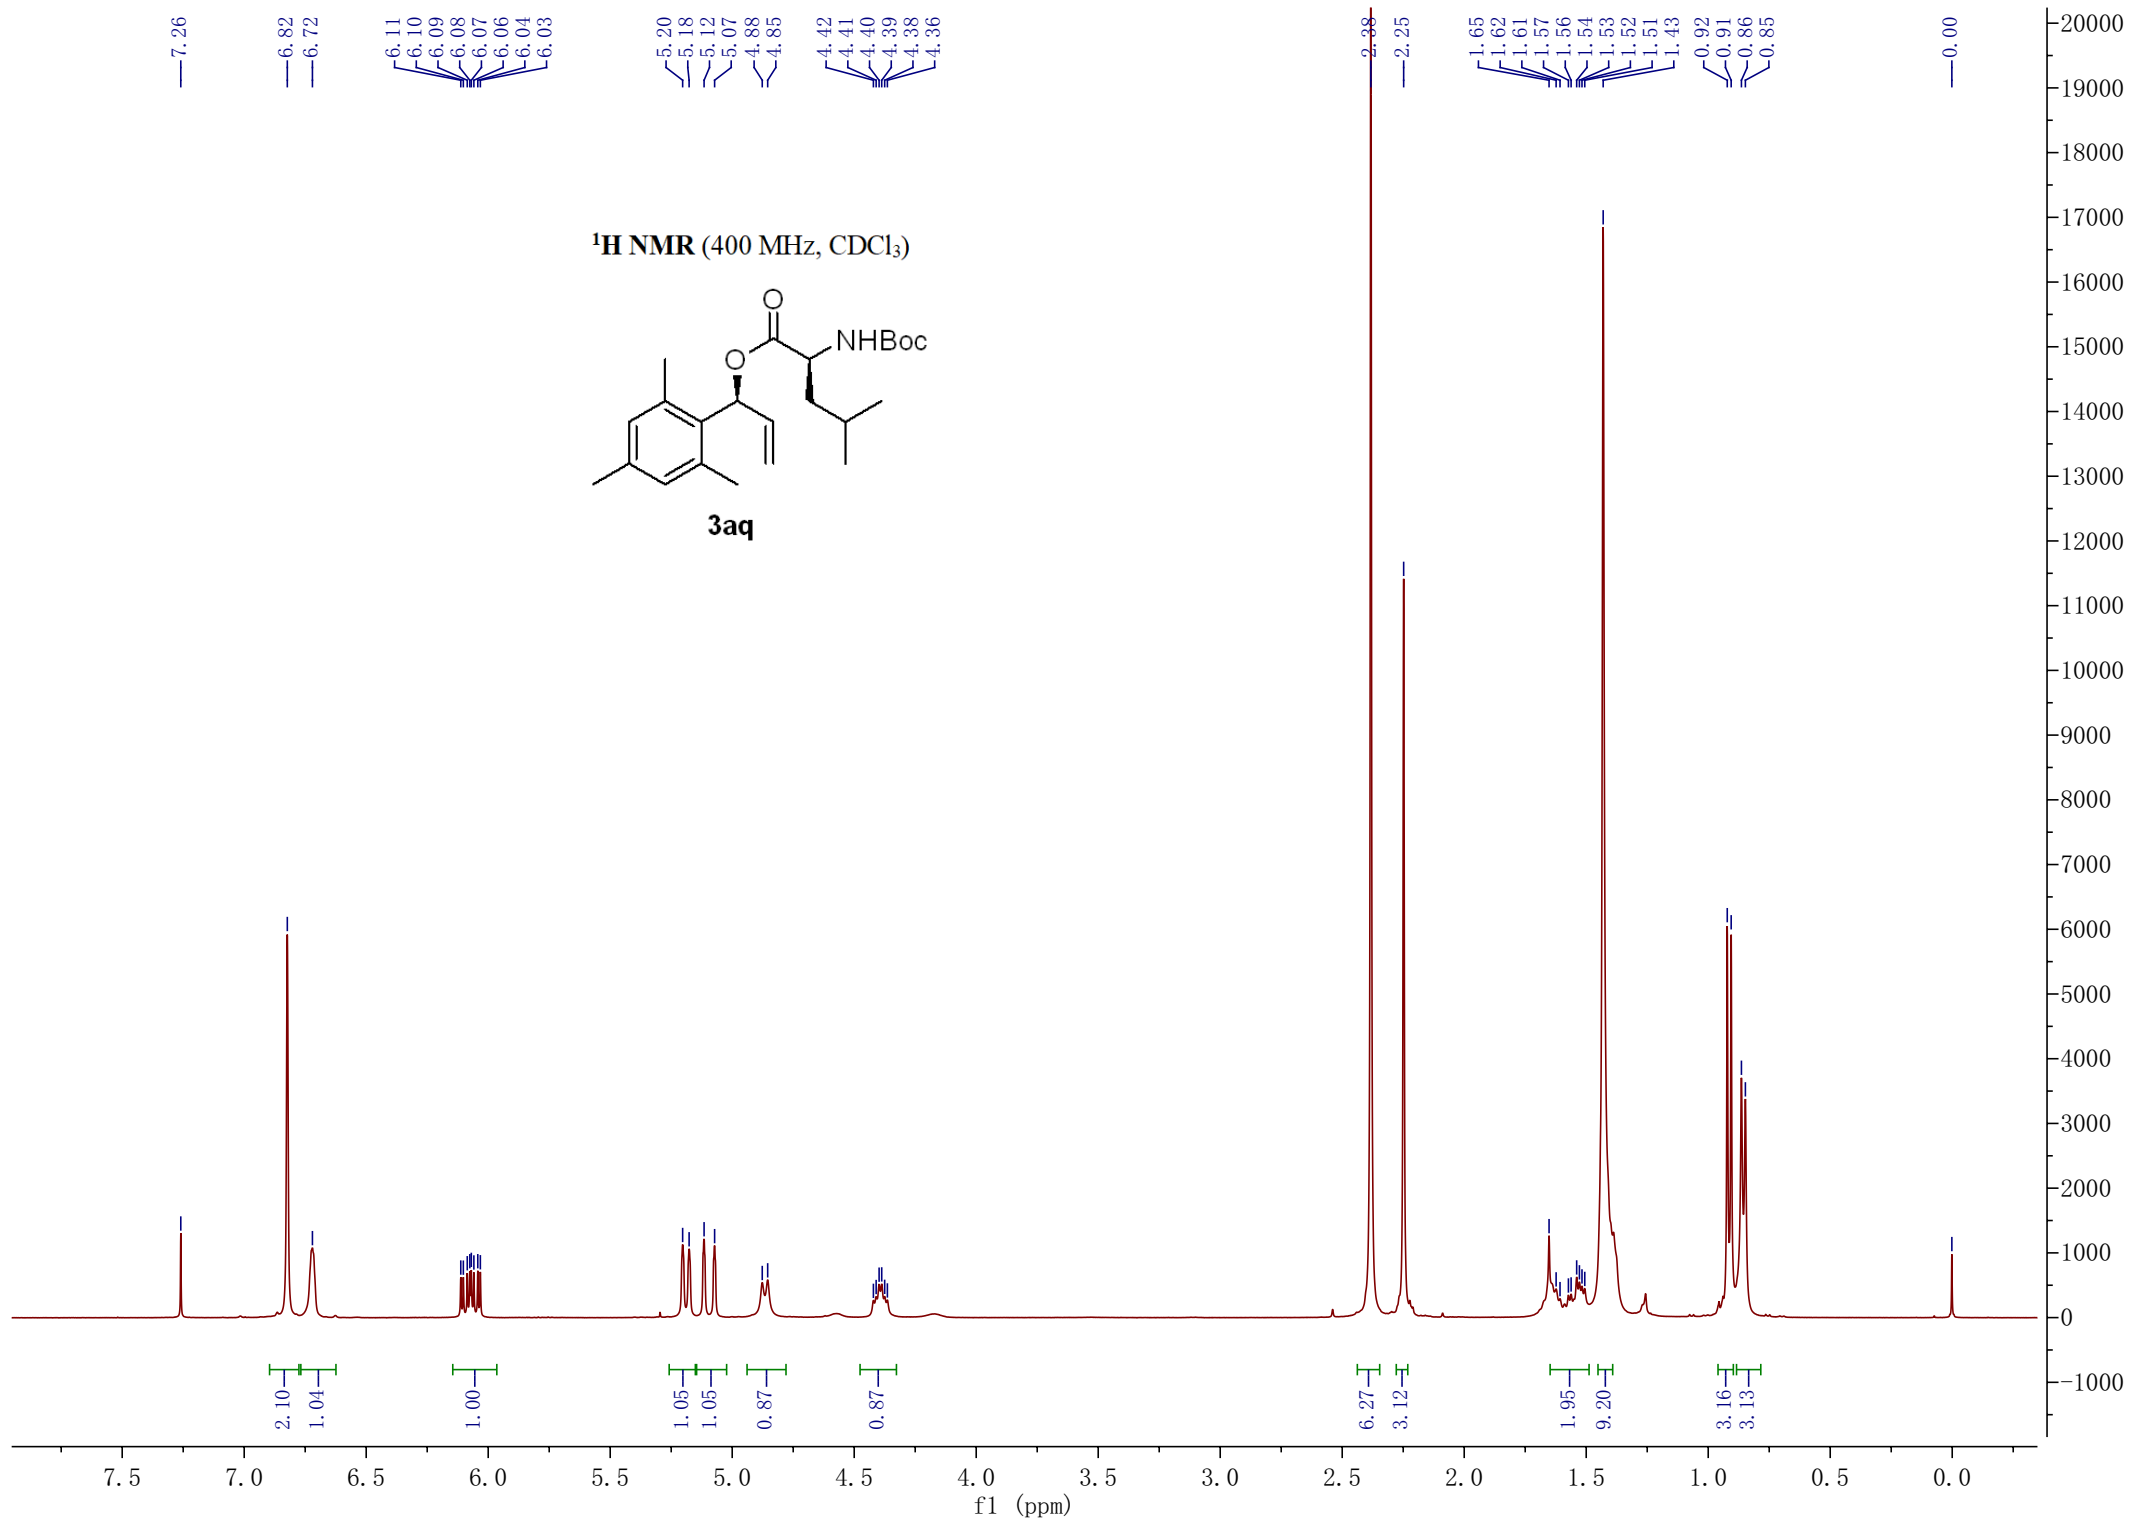

172.78

155.52

137.81

137.24

135.28

131.34

129.90

116.46

79.88

77.58

77.16

76.74

73.92

52.29

41.85

28.44

24.85

23.10

21.87

20.99

20.59

<sup>13</sup>C NMR (100 MHz, CDCl<sub>3</sub>)

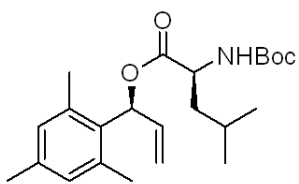

**3aq**

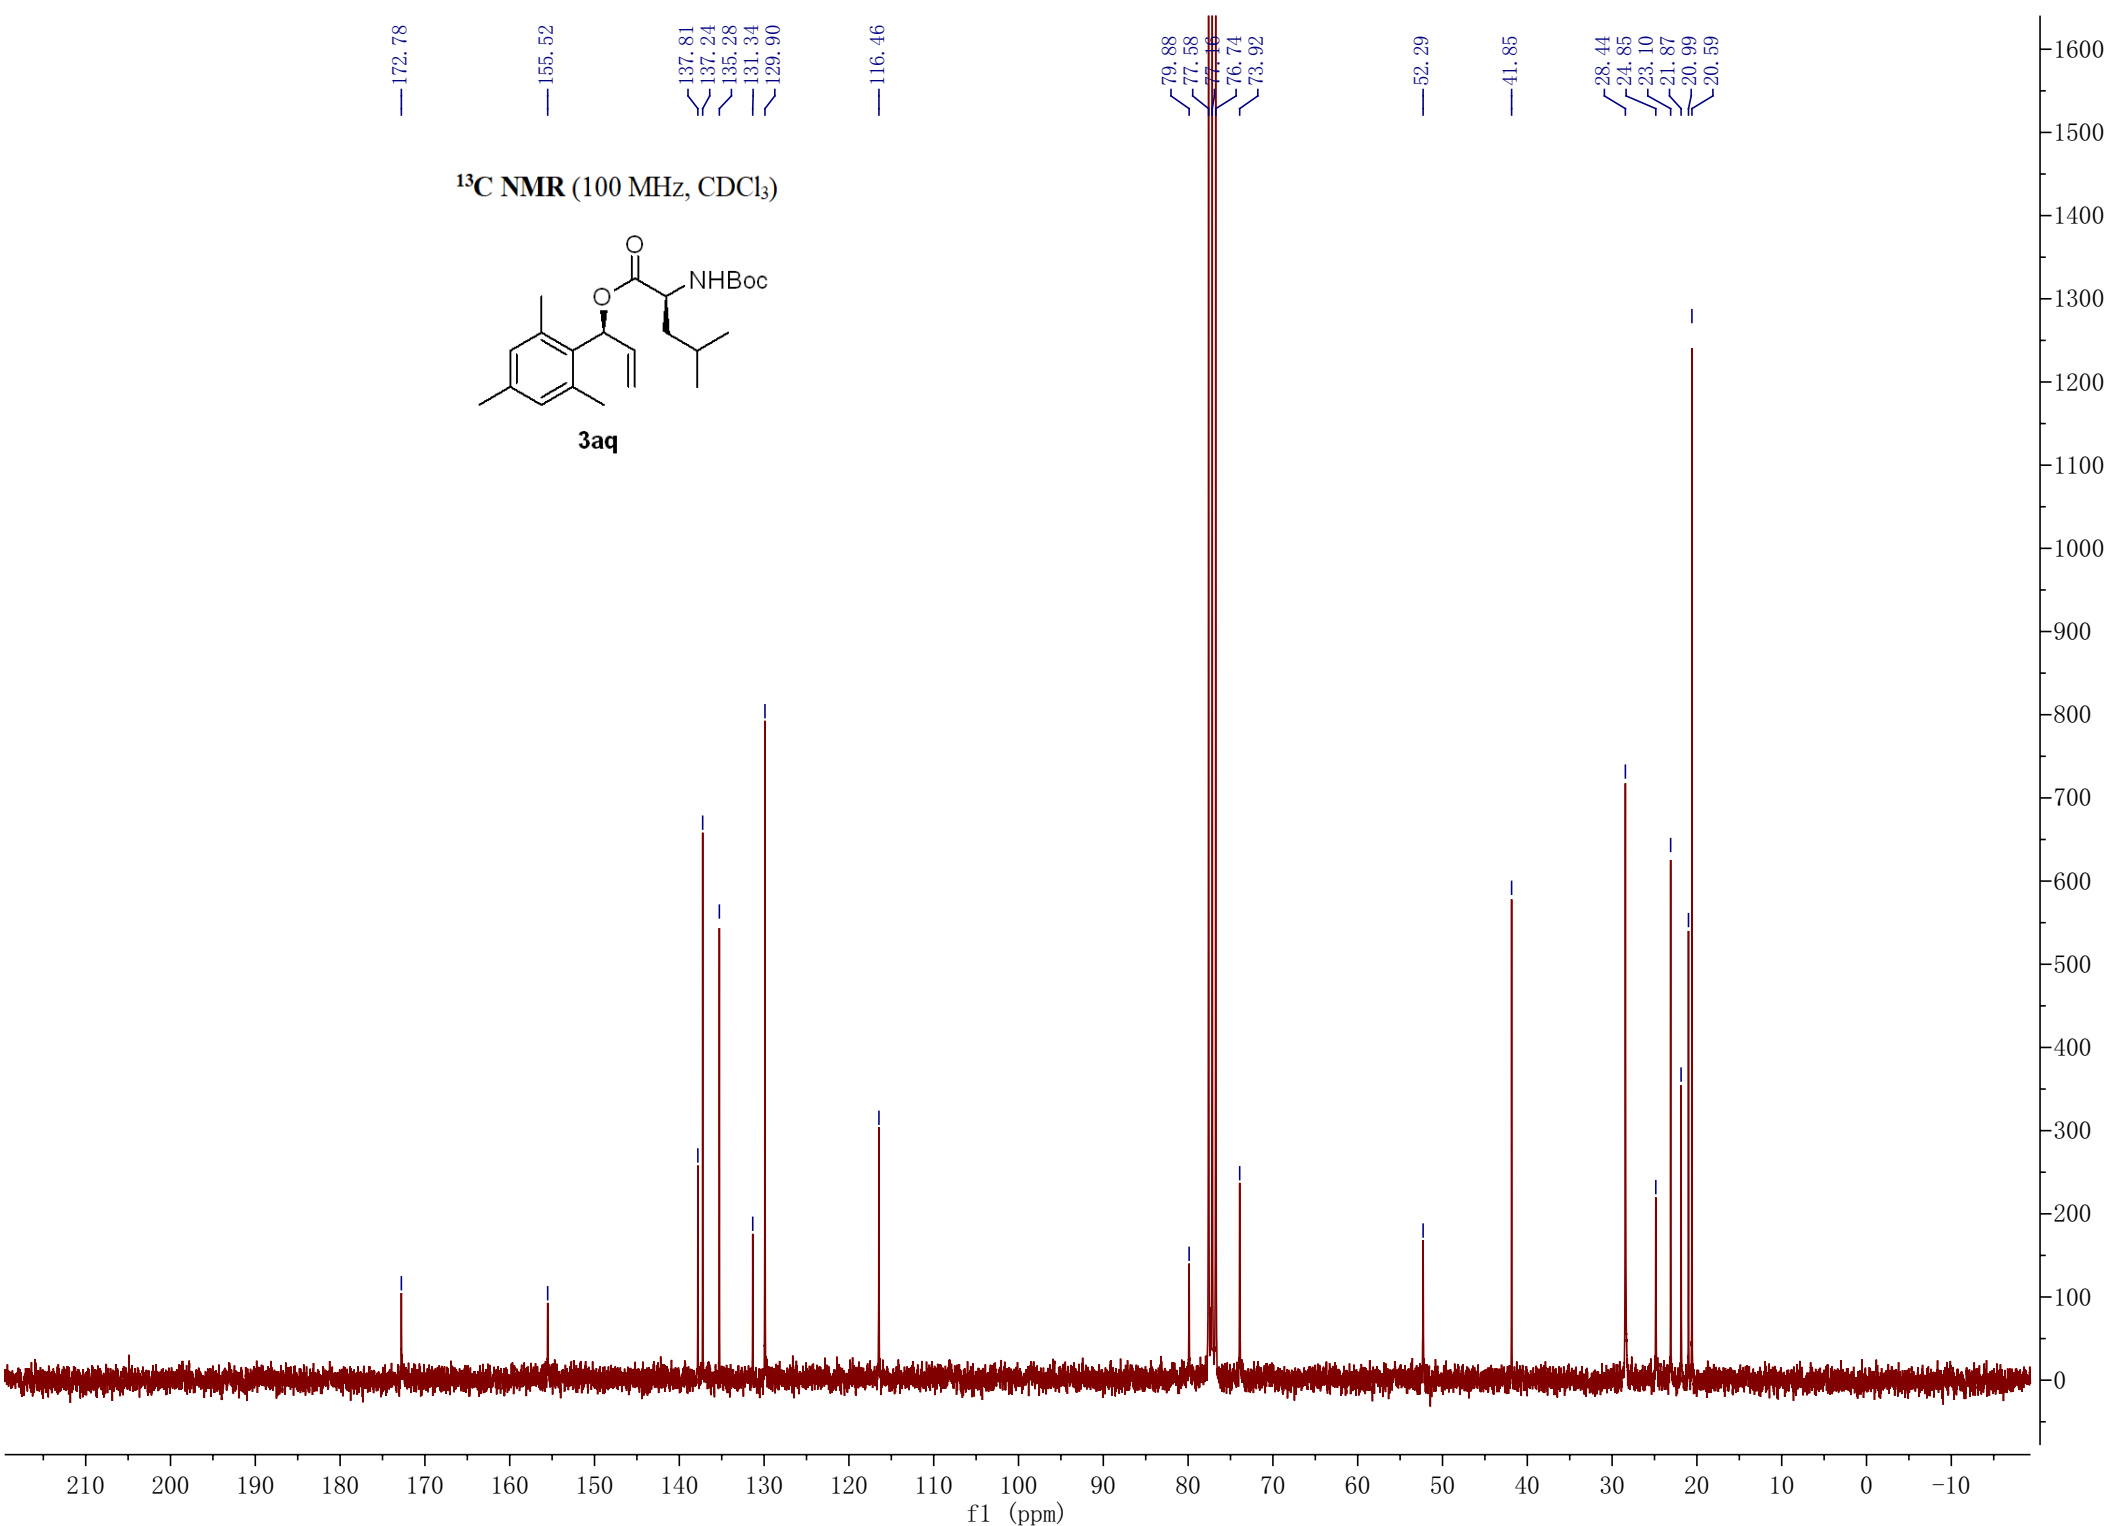

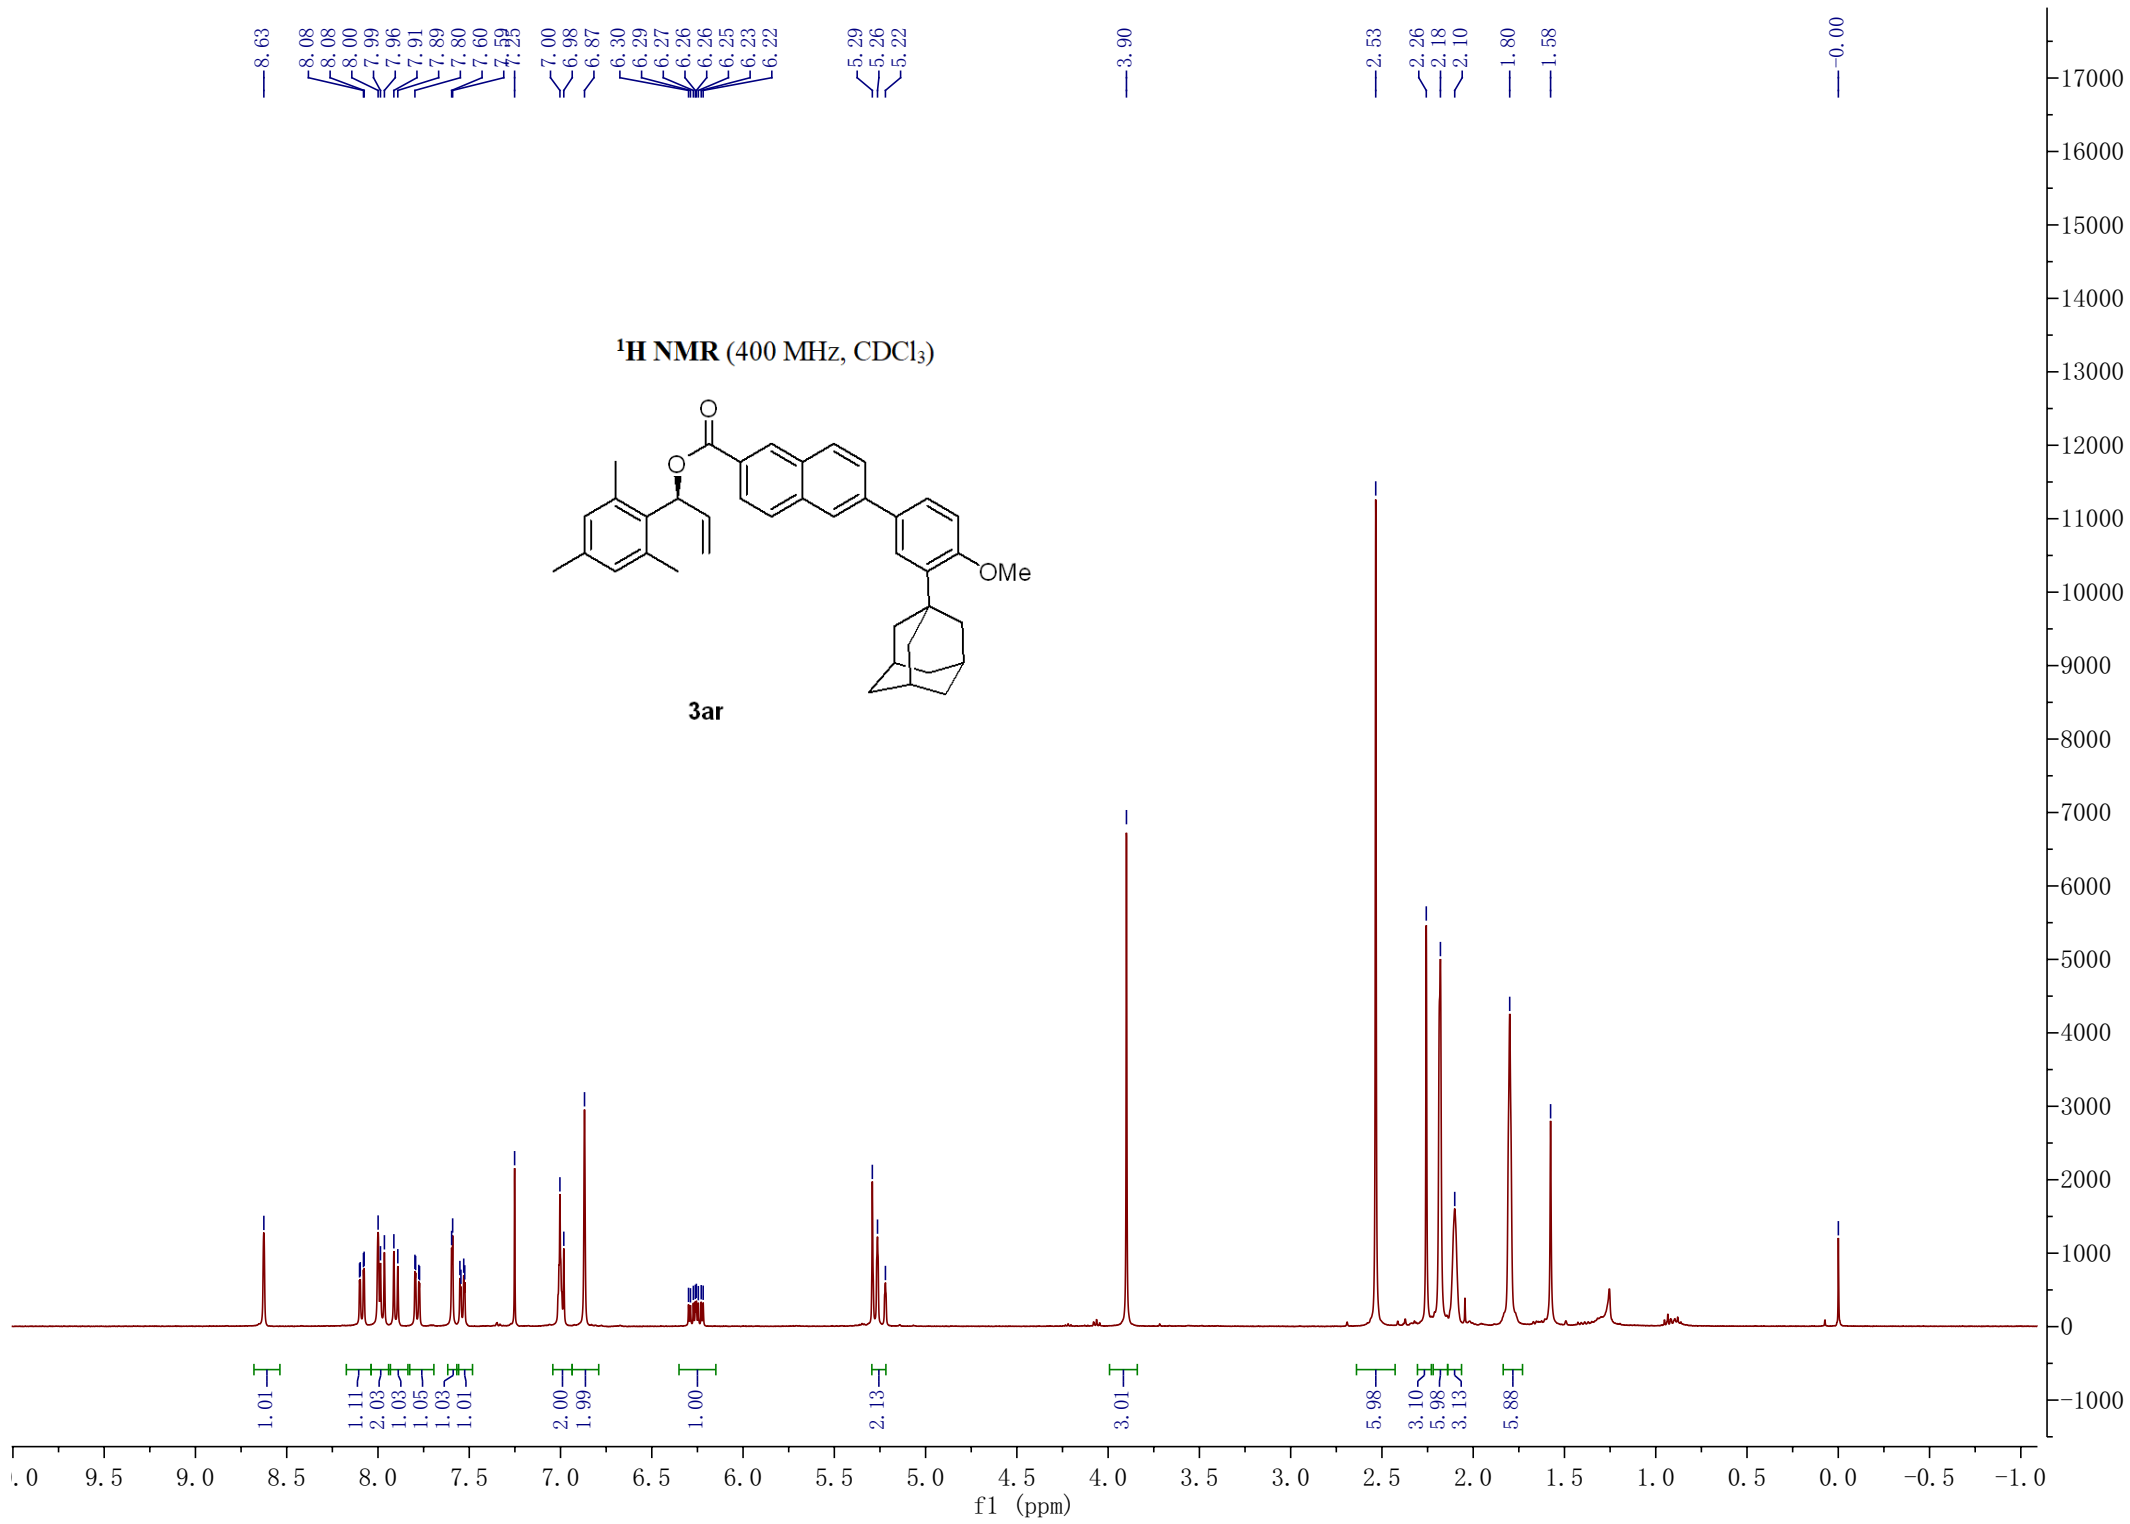

<sup>13</sup>C NMR (100 MHz, CDCl<sub>3</sub>)

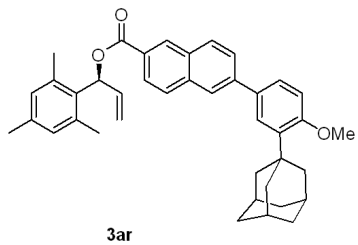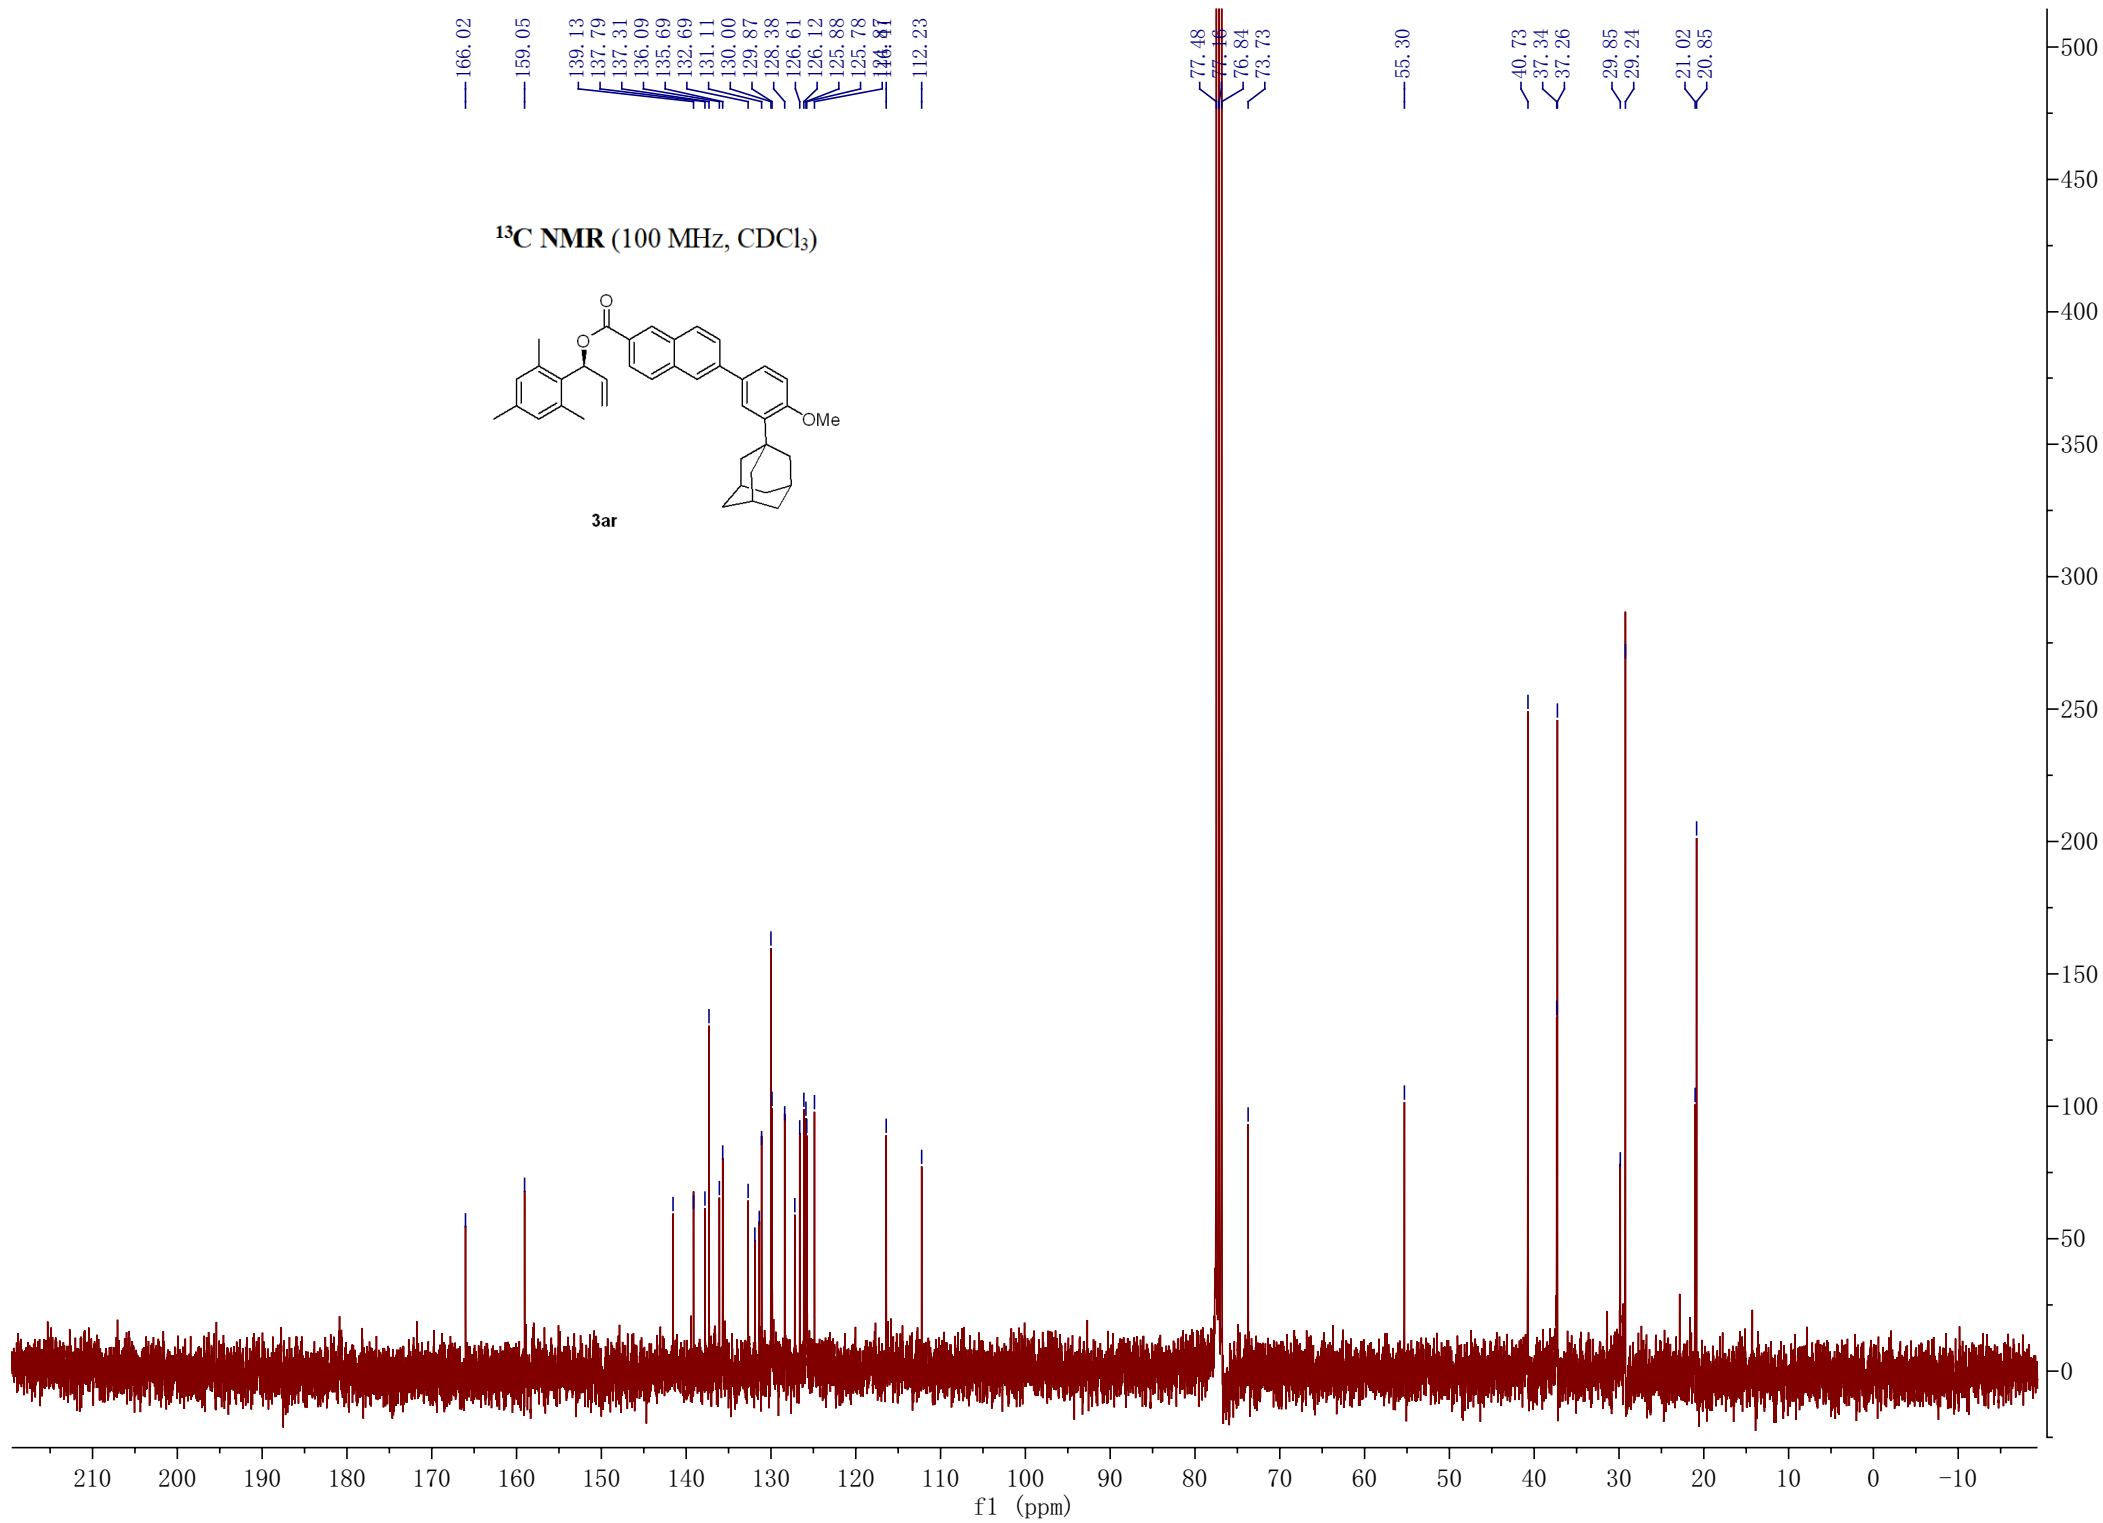

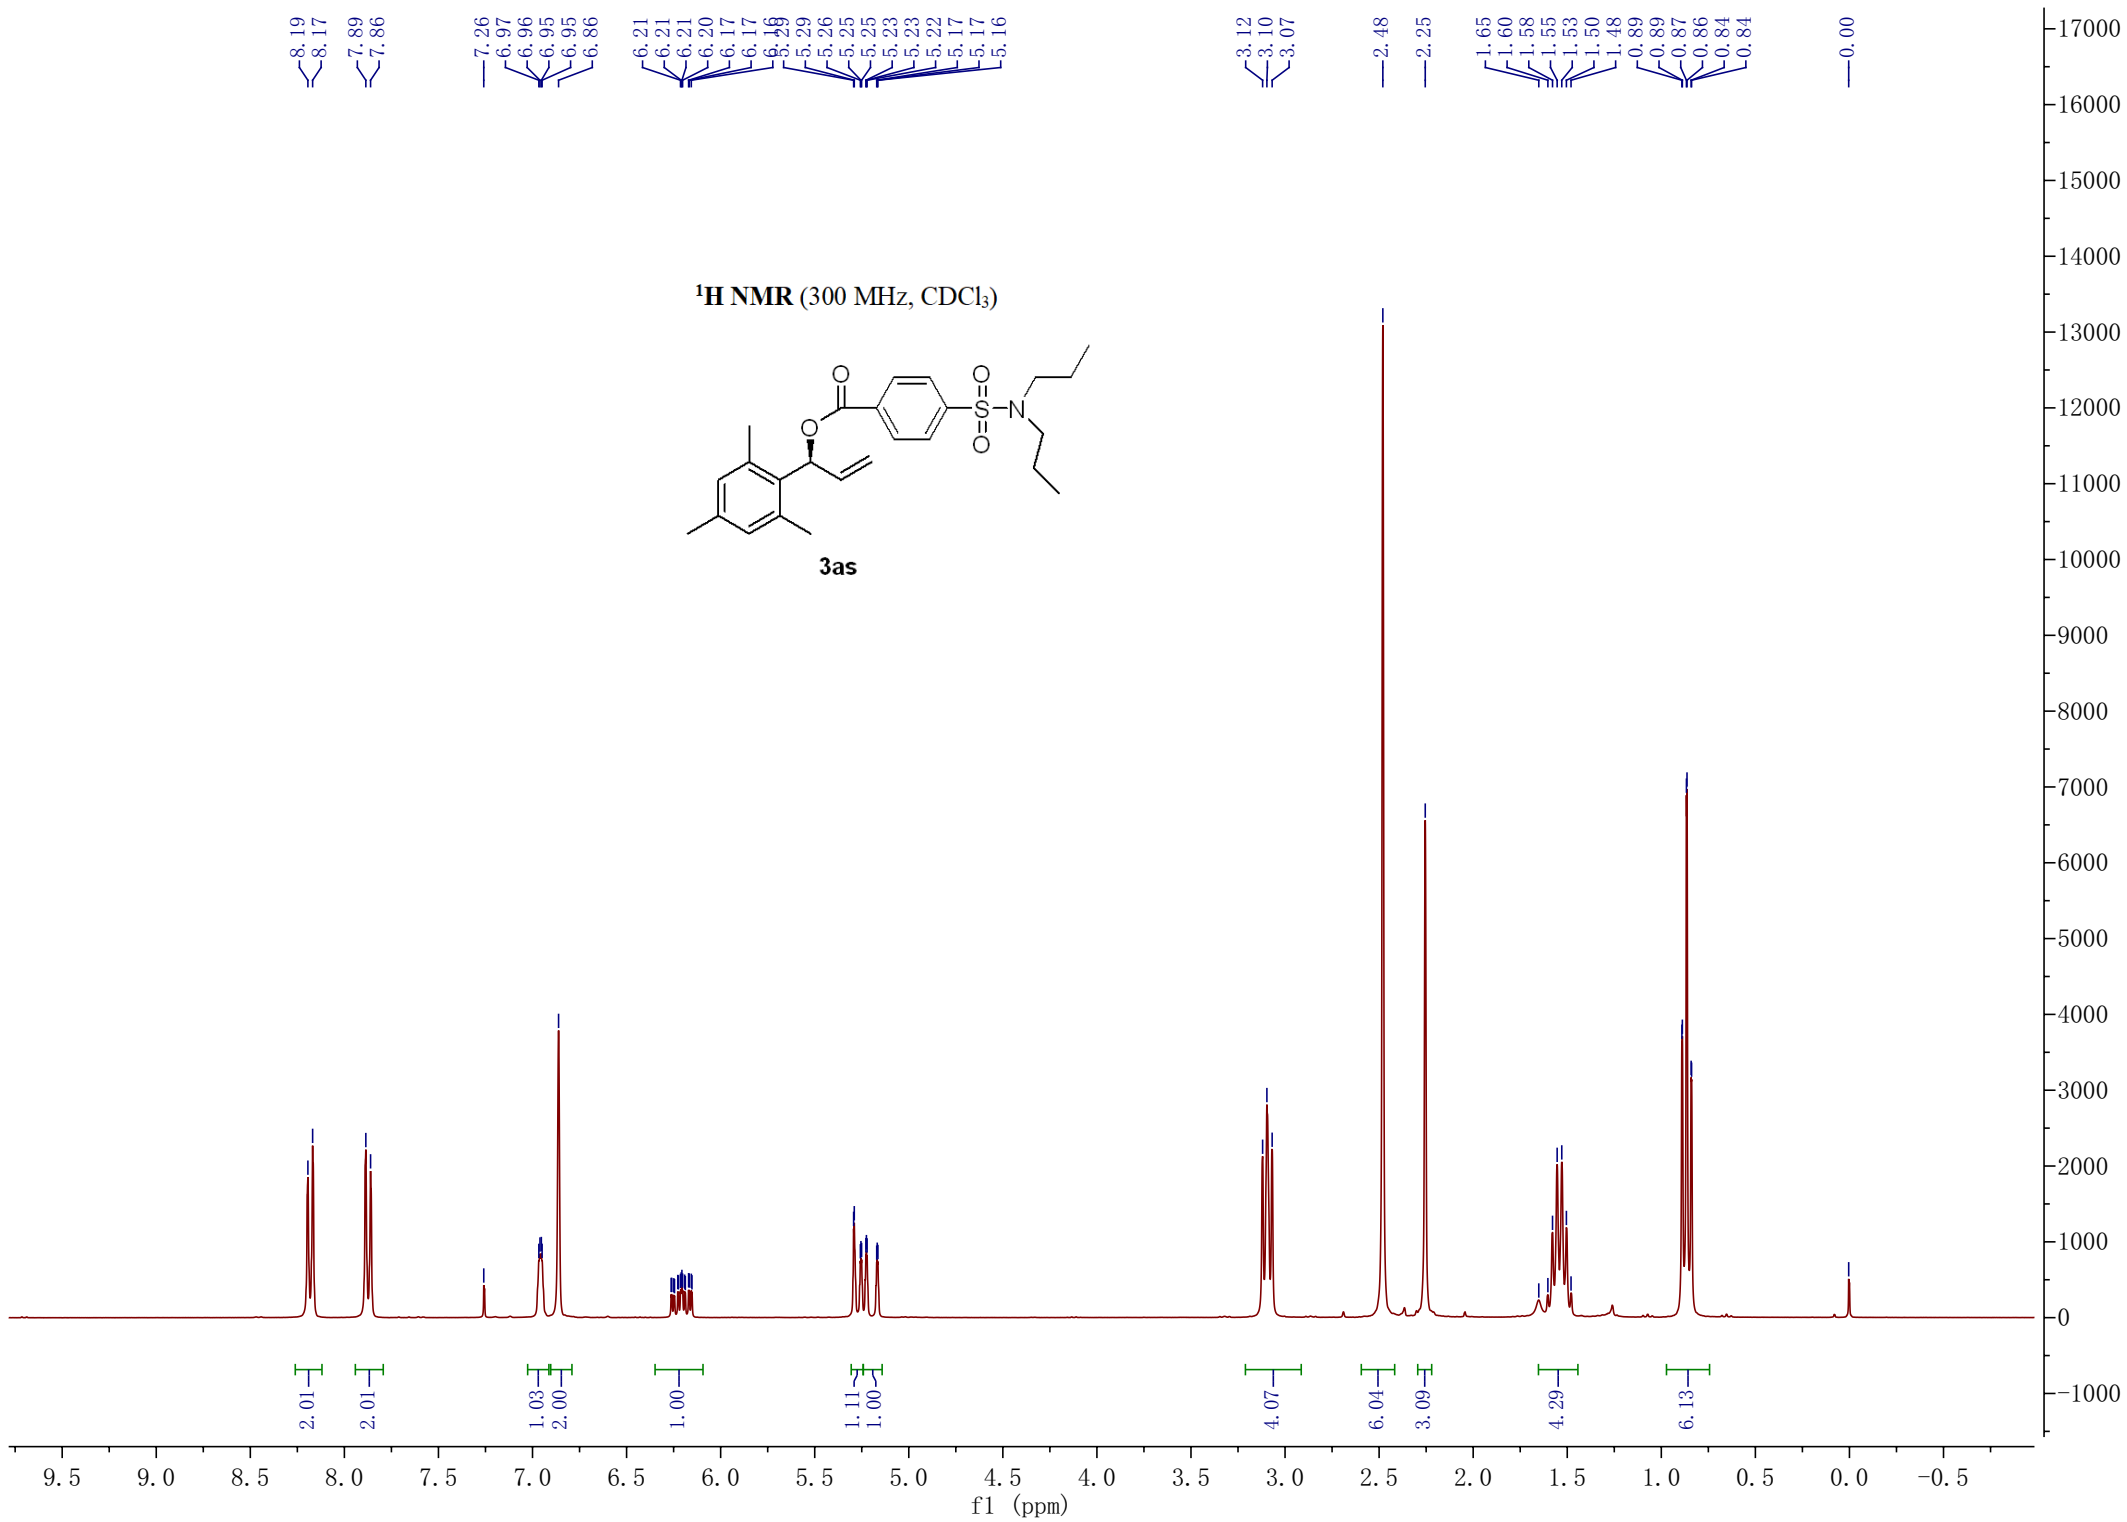

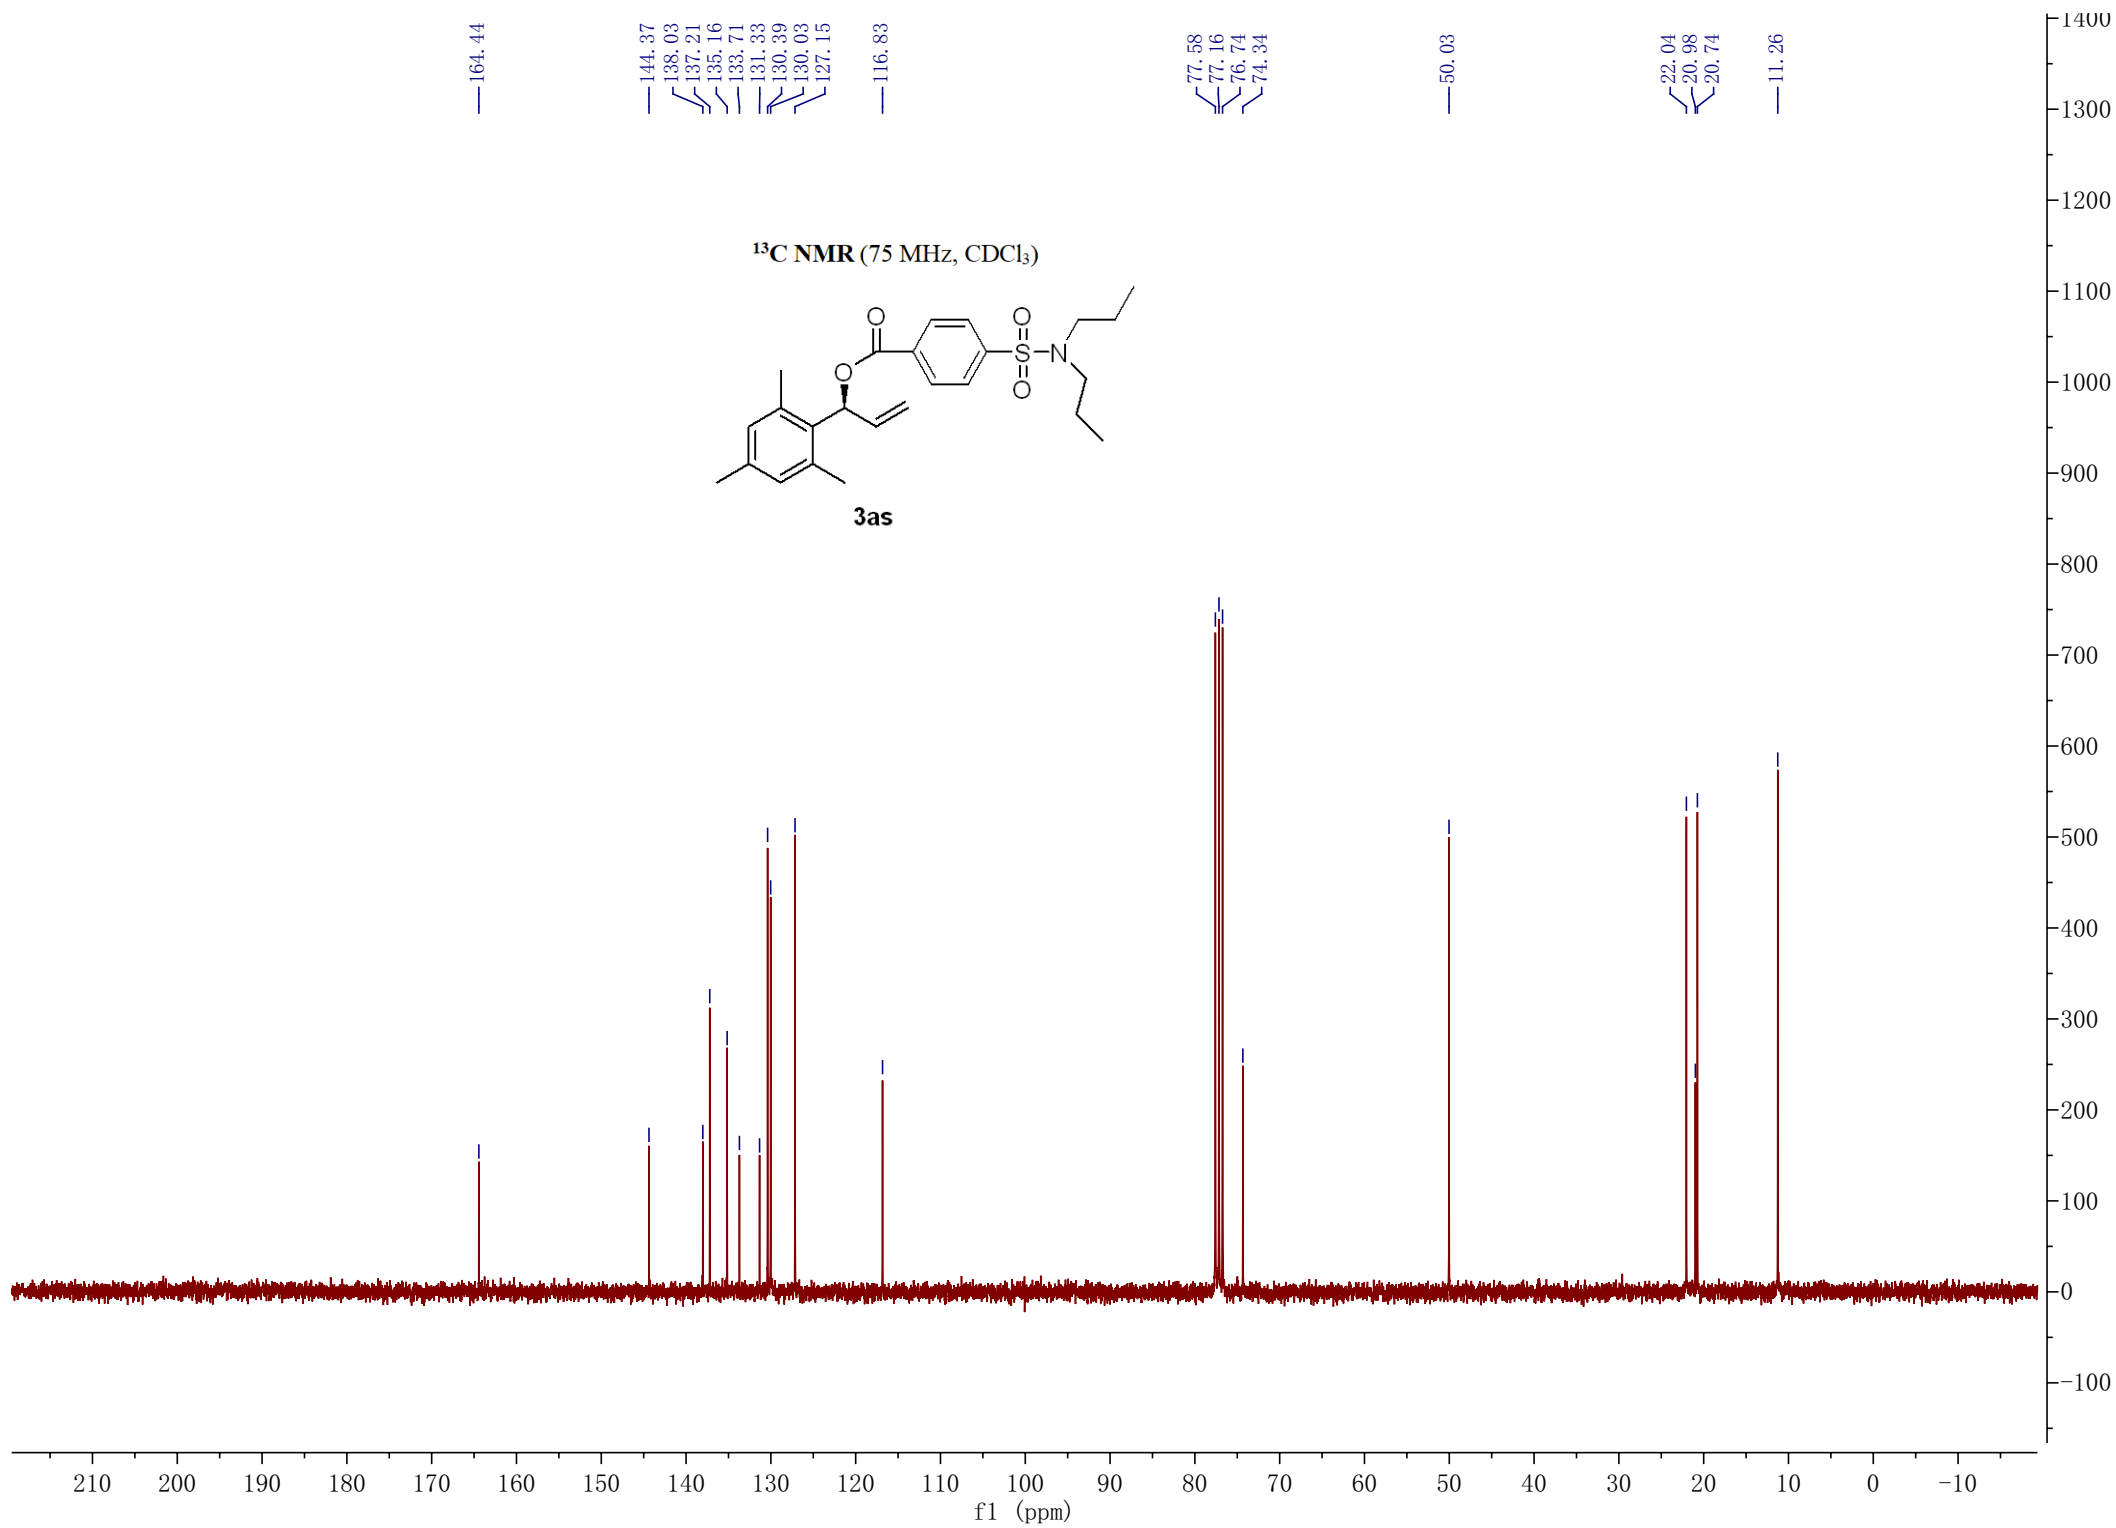

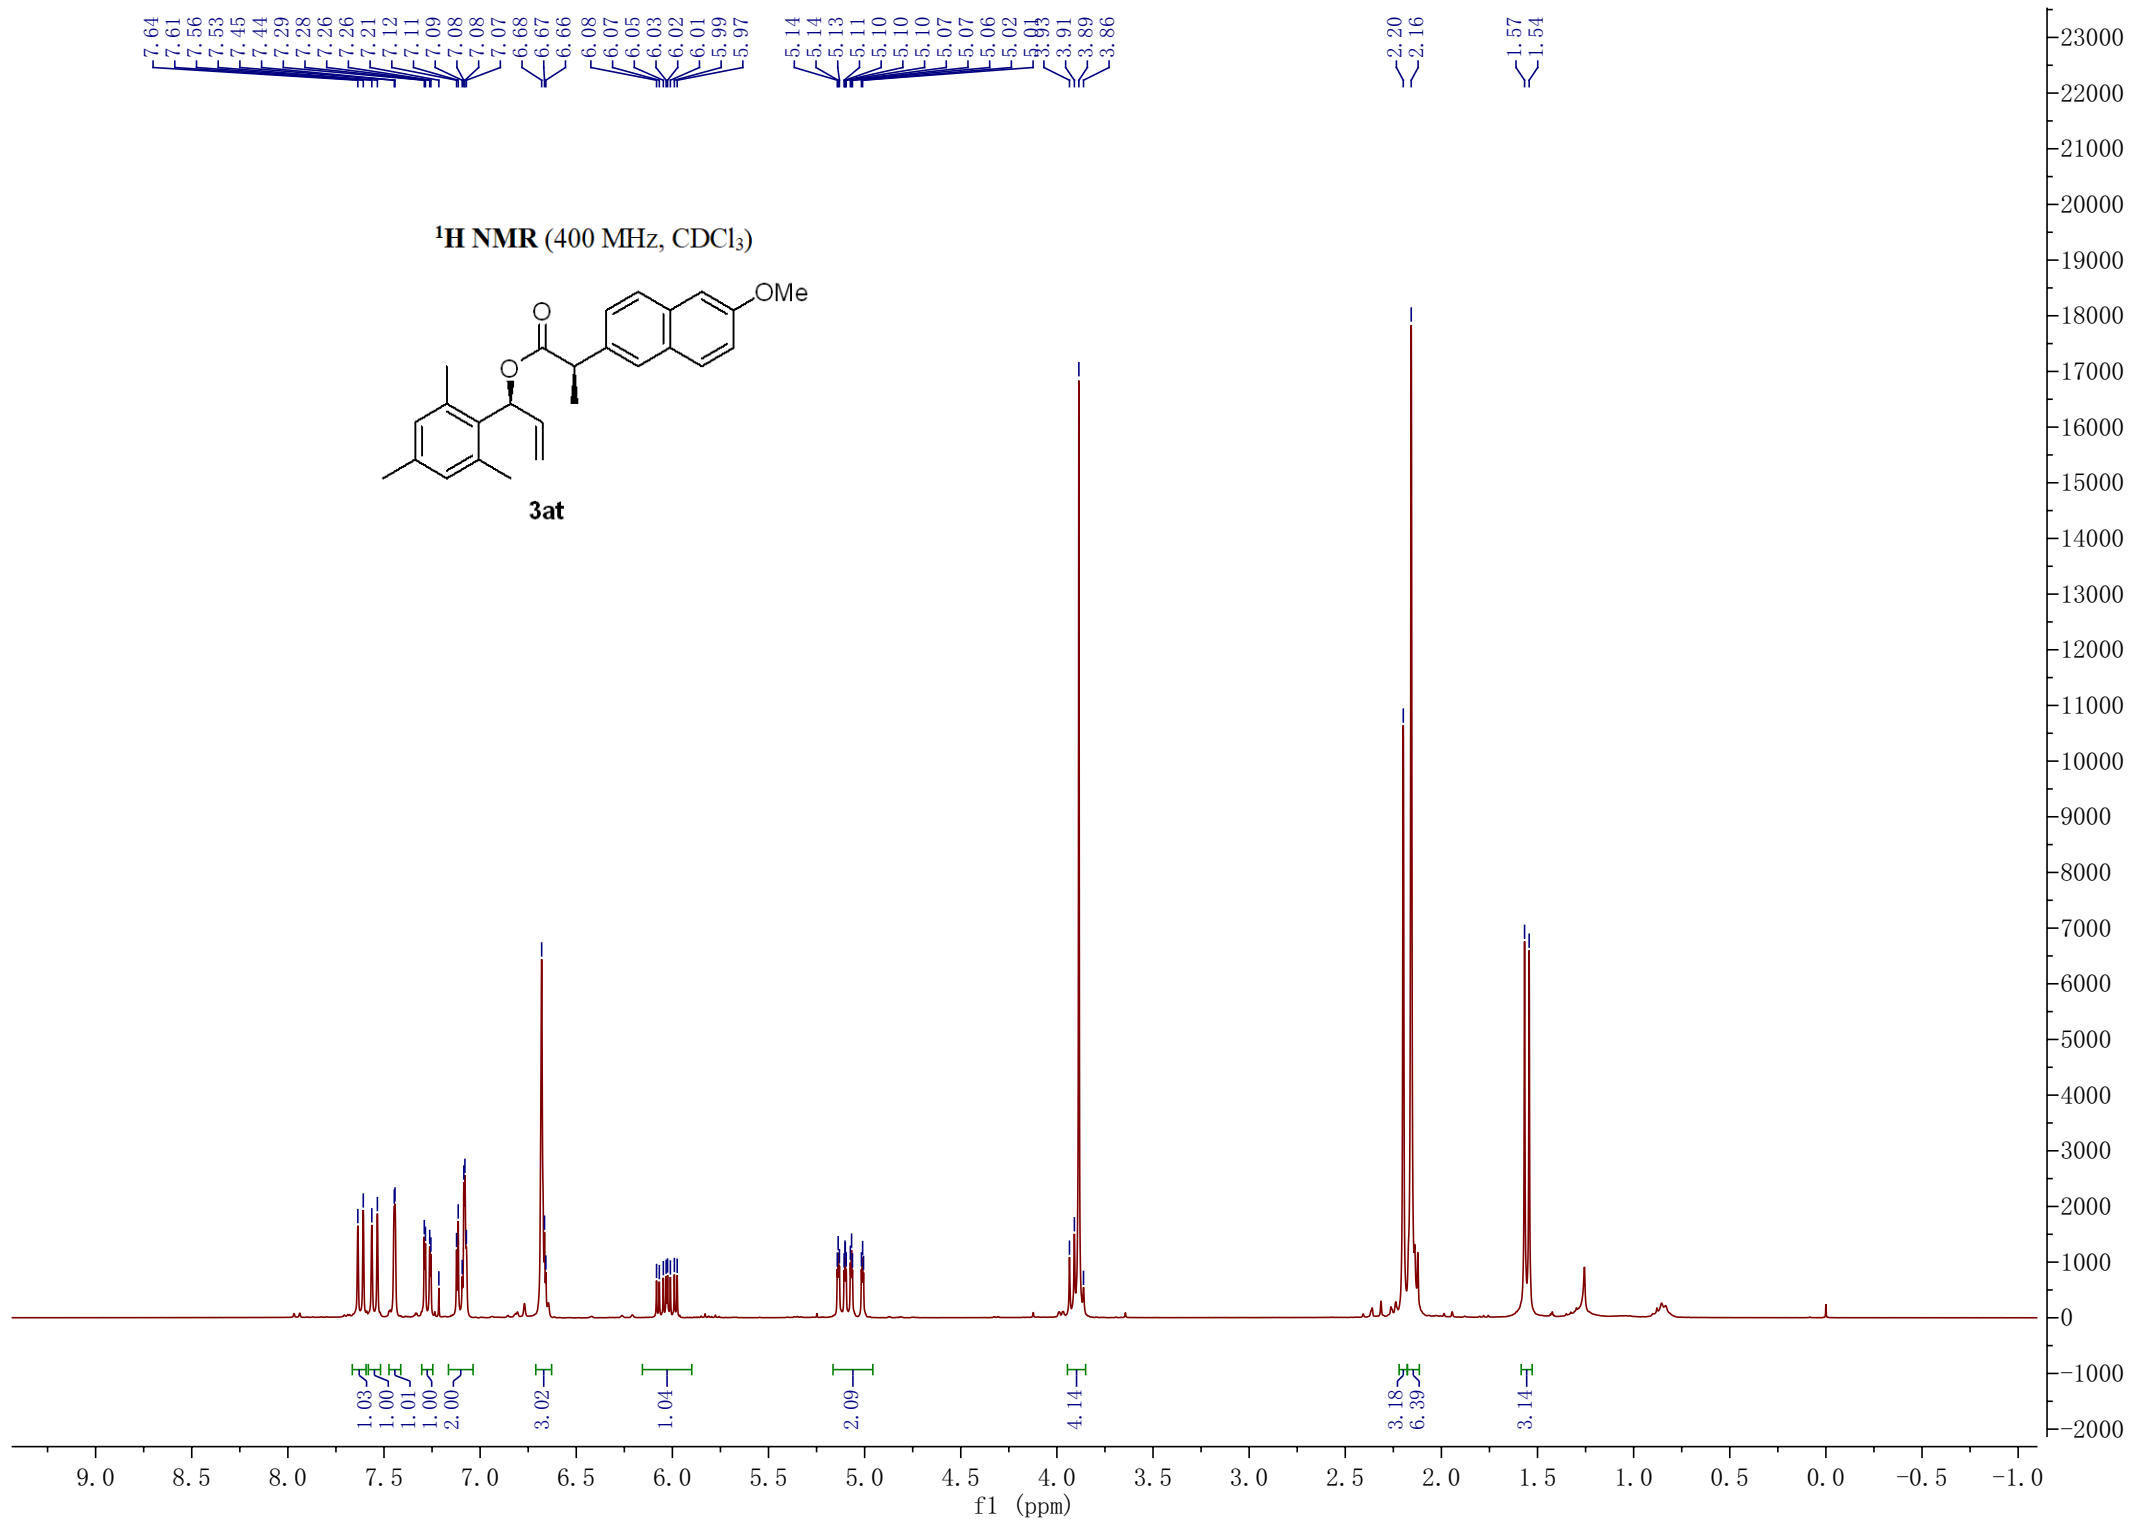



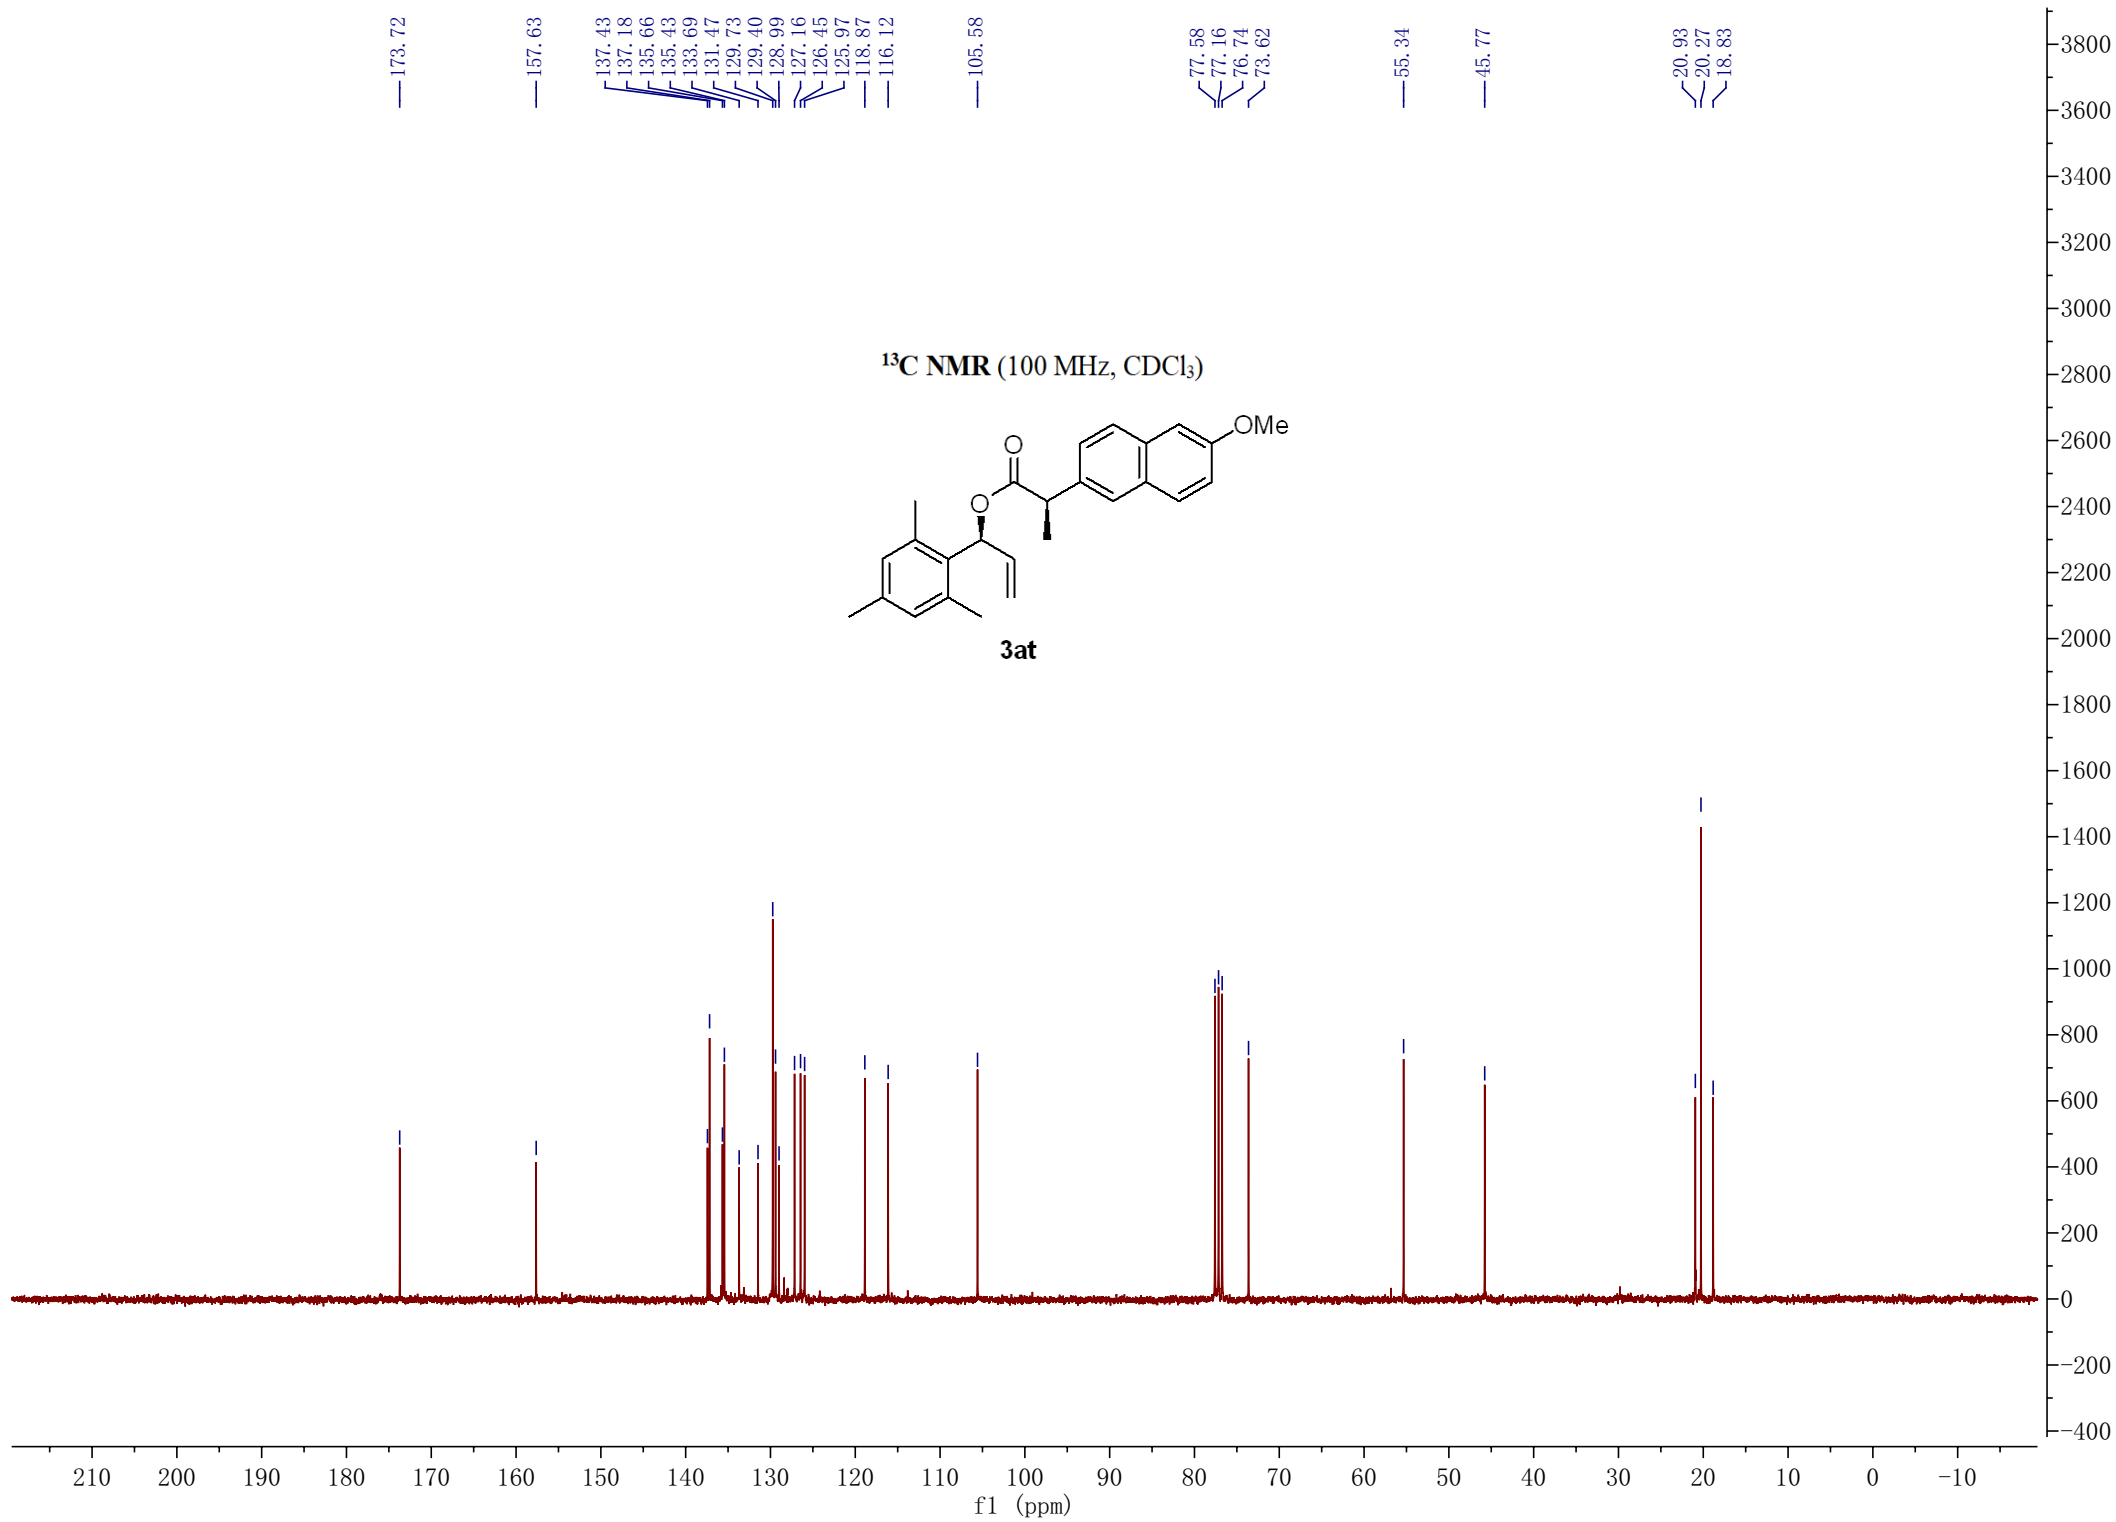

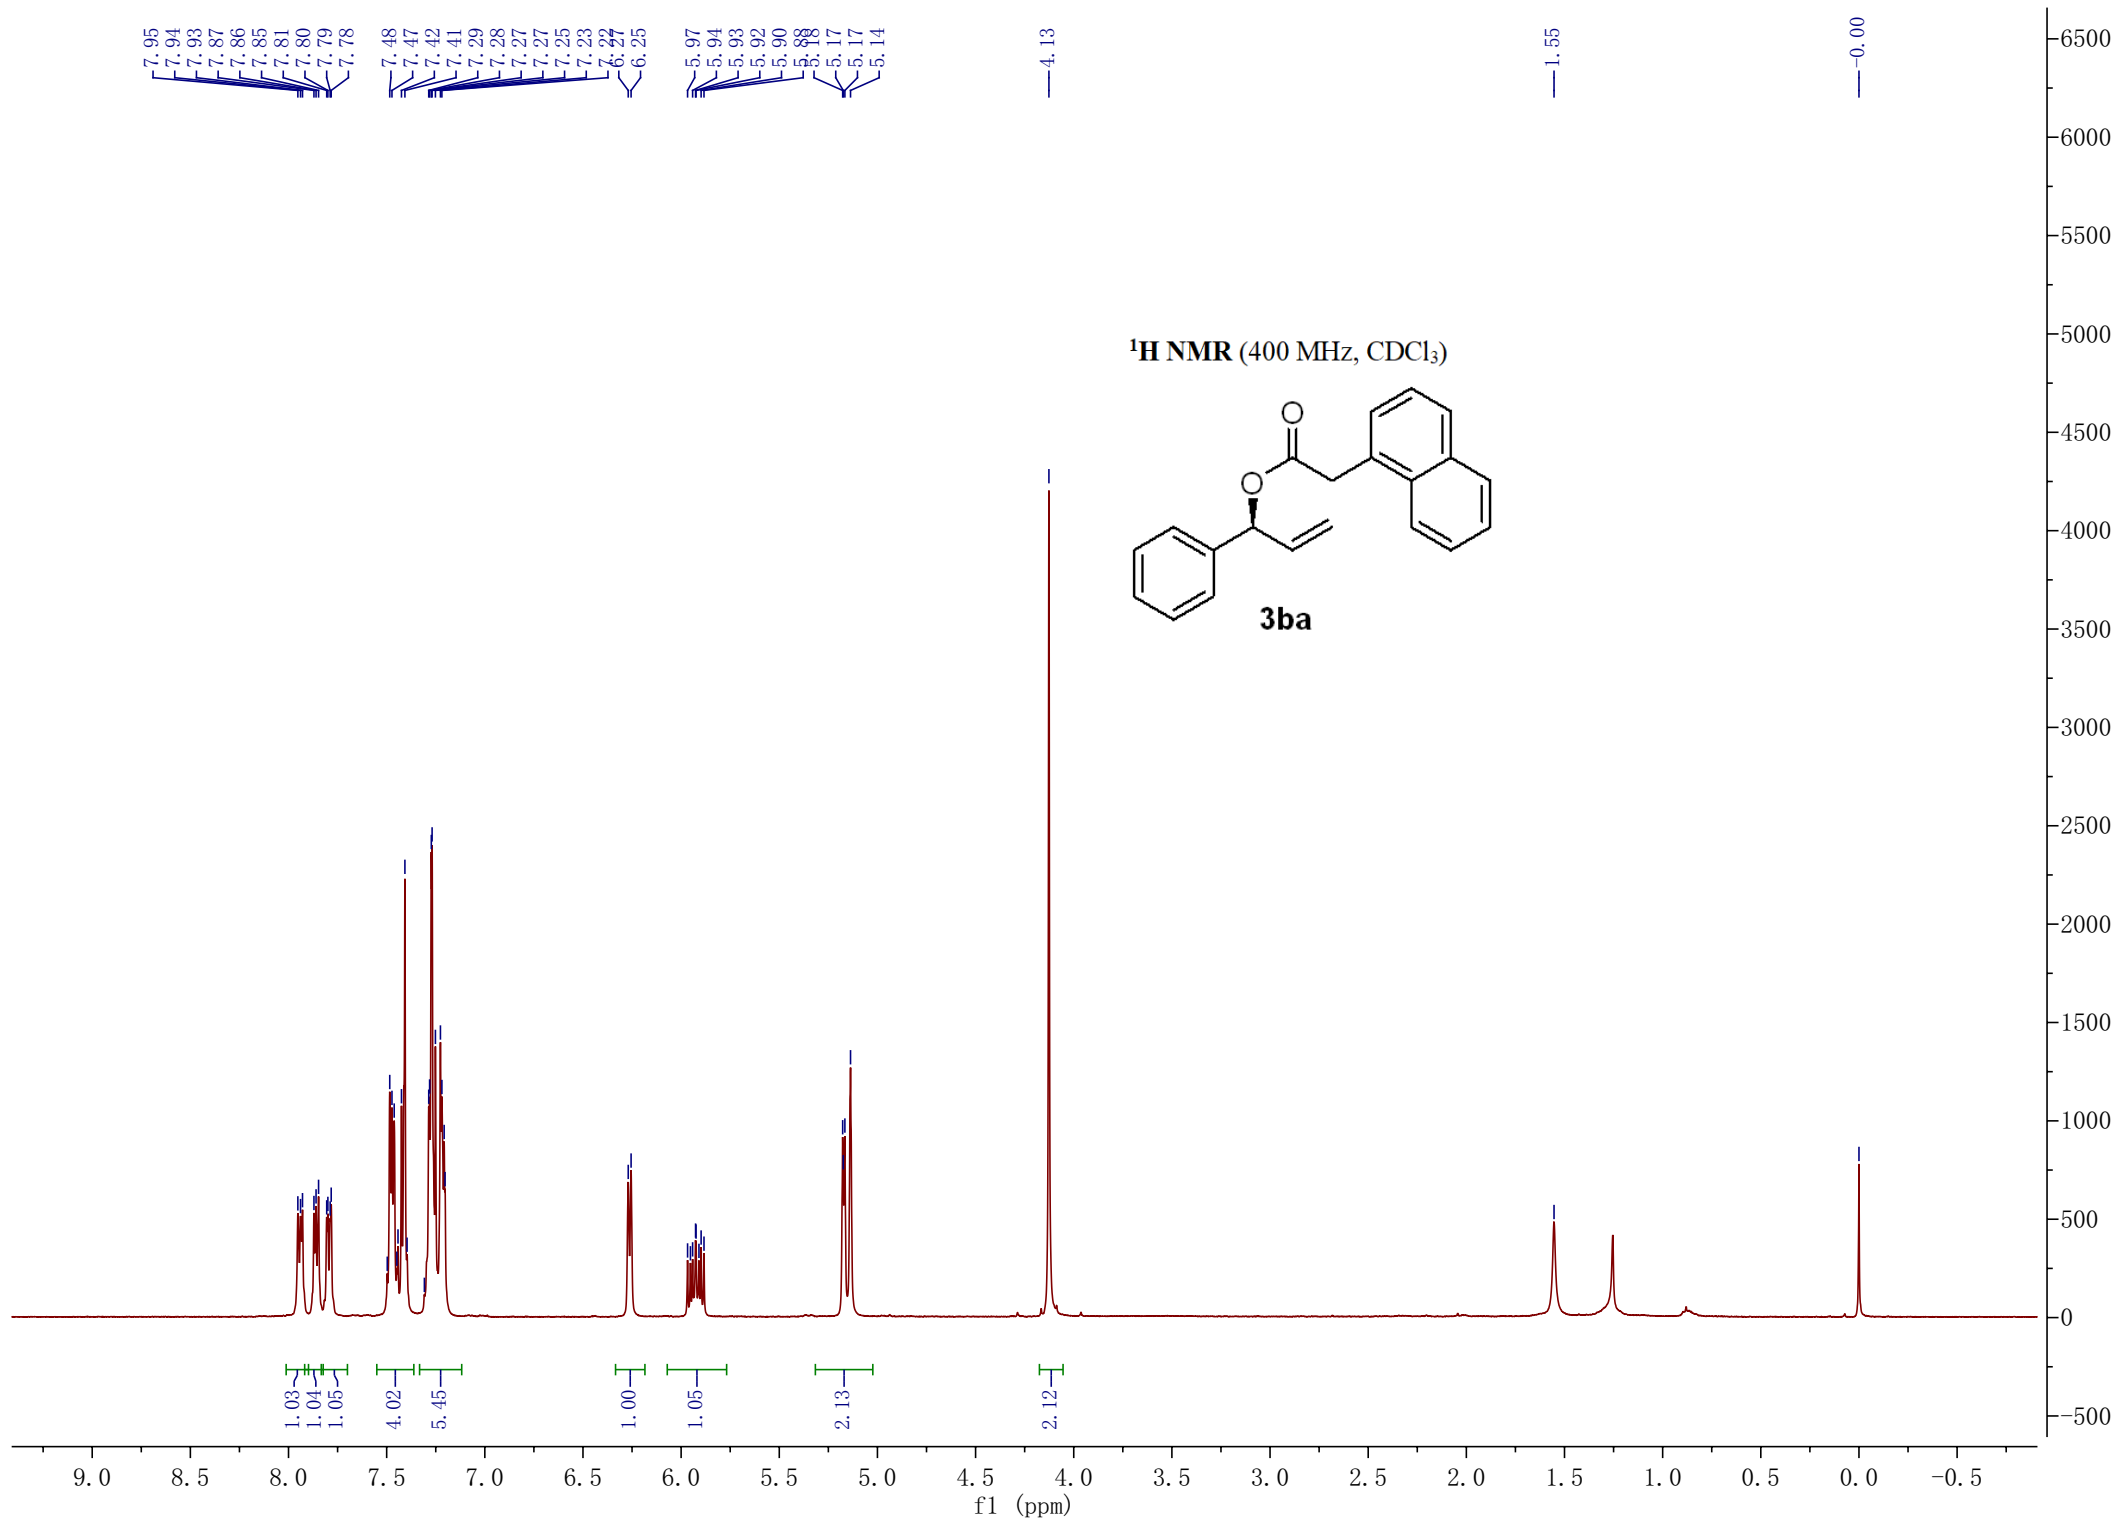

<sup>13</sup>C NMR (100 MHz, CDCl<sub>3</sub>)

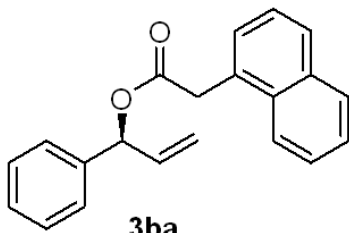

170.61  
138.82  
136.13  
133.95  
132.22  
130.60  
128.81  
128.59  
128.23  
128.14  
127.17  
126.43  
125.89  
125.58  
123.99  
117.08

77.58  
77.16  
76.74

39.54

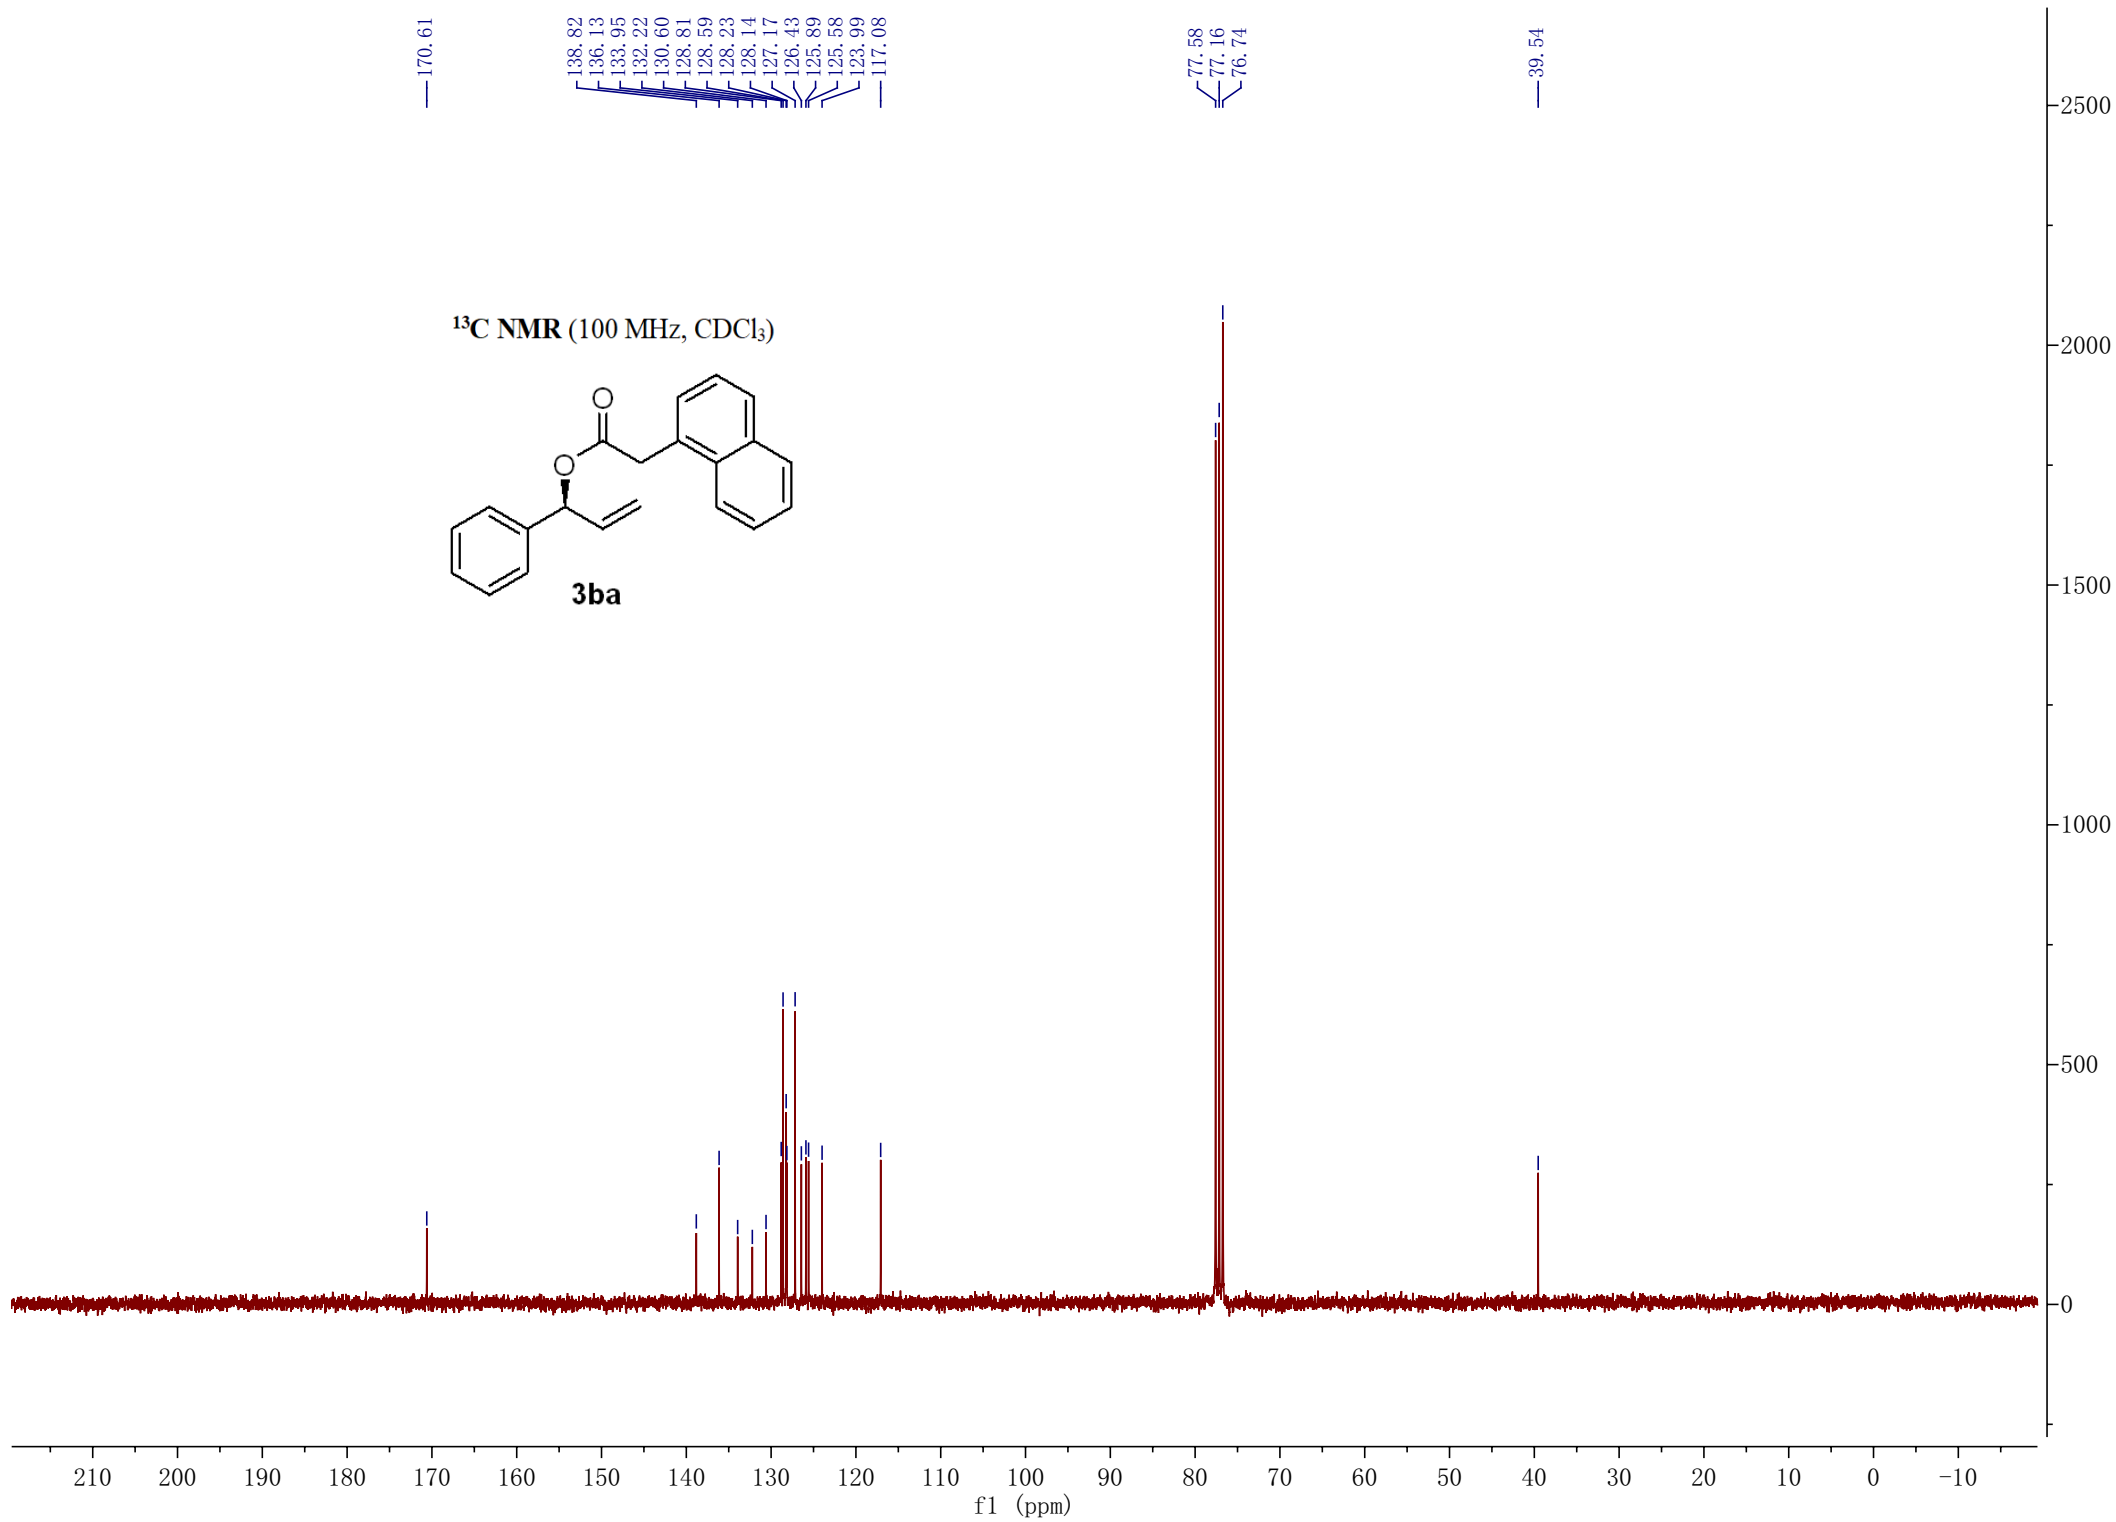

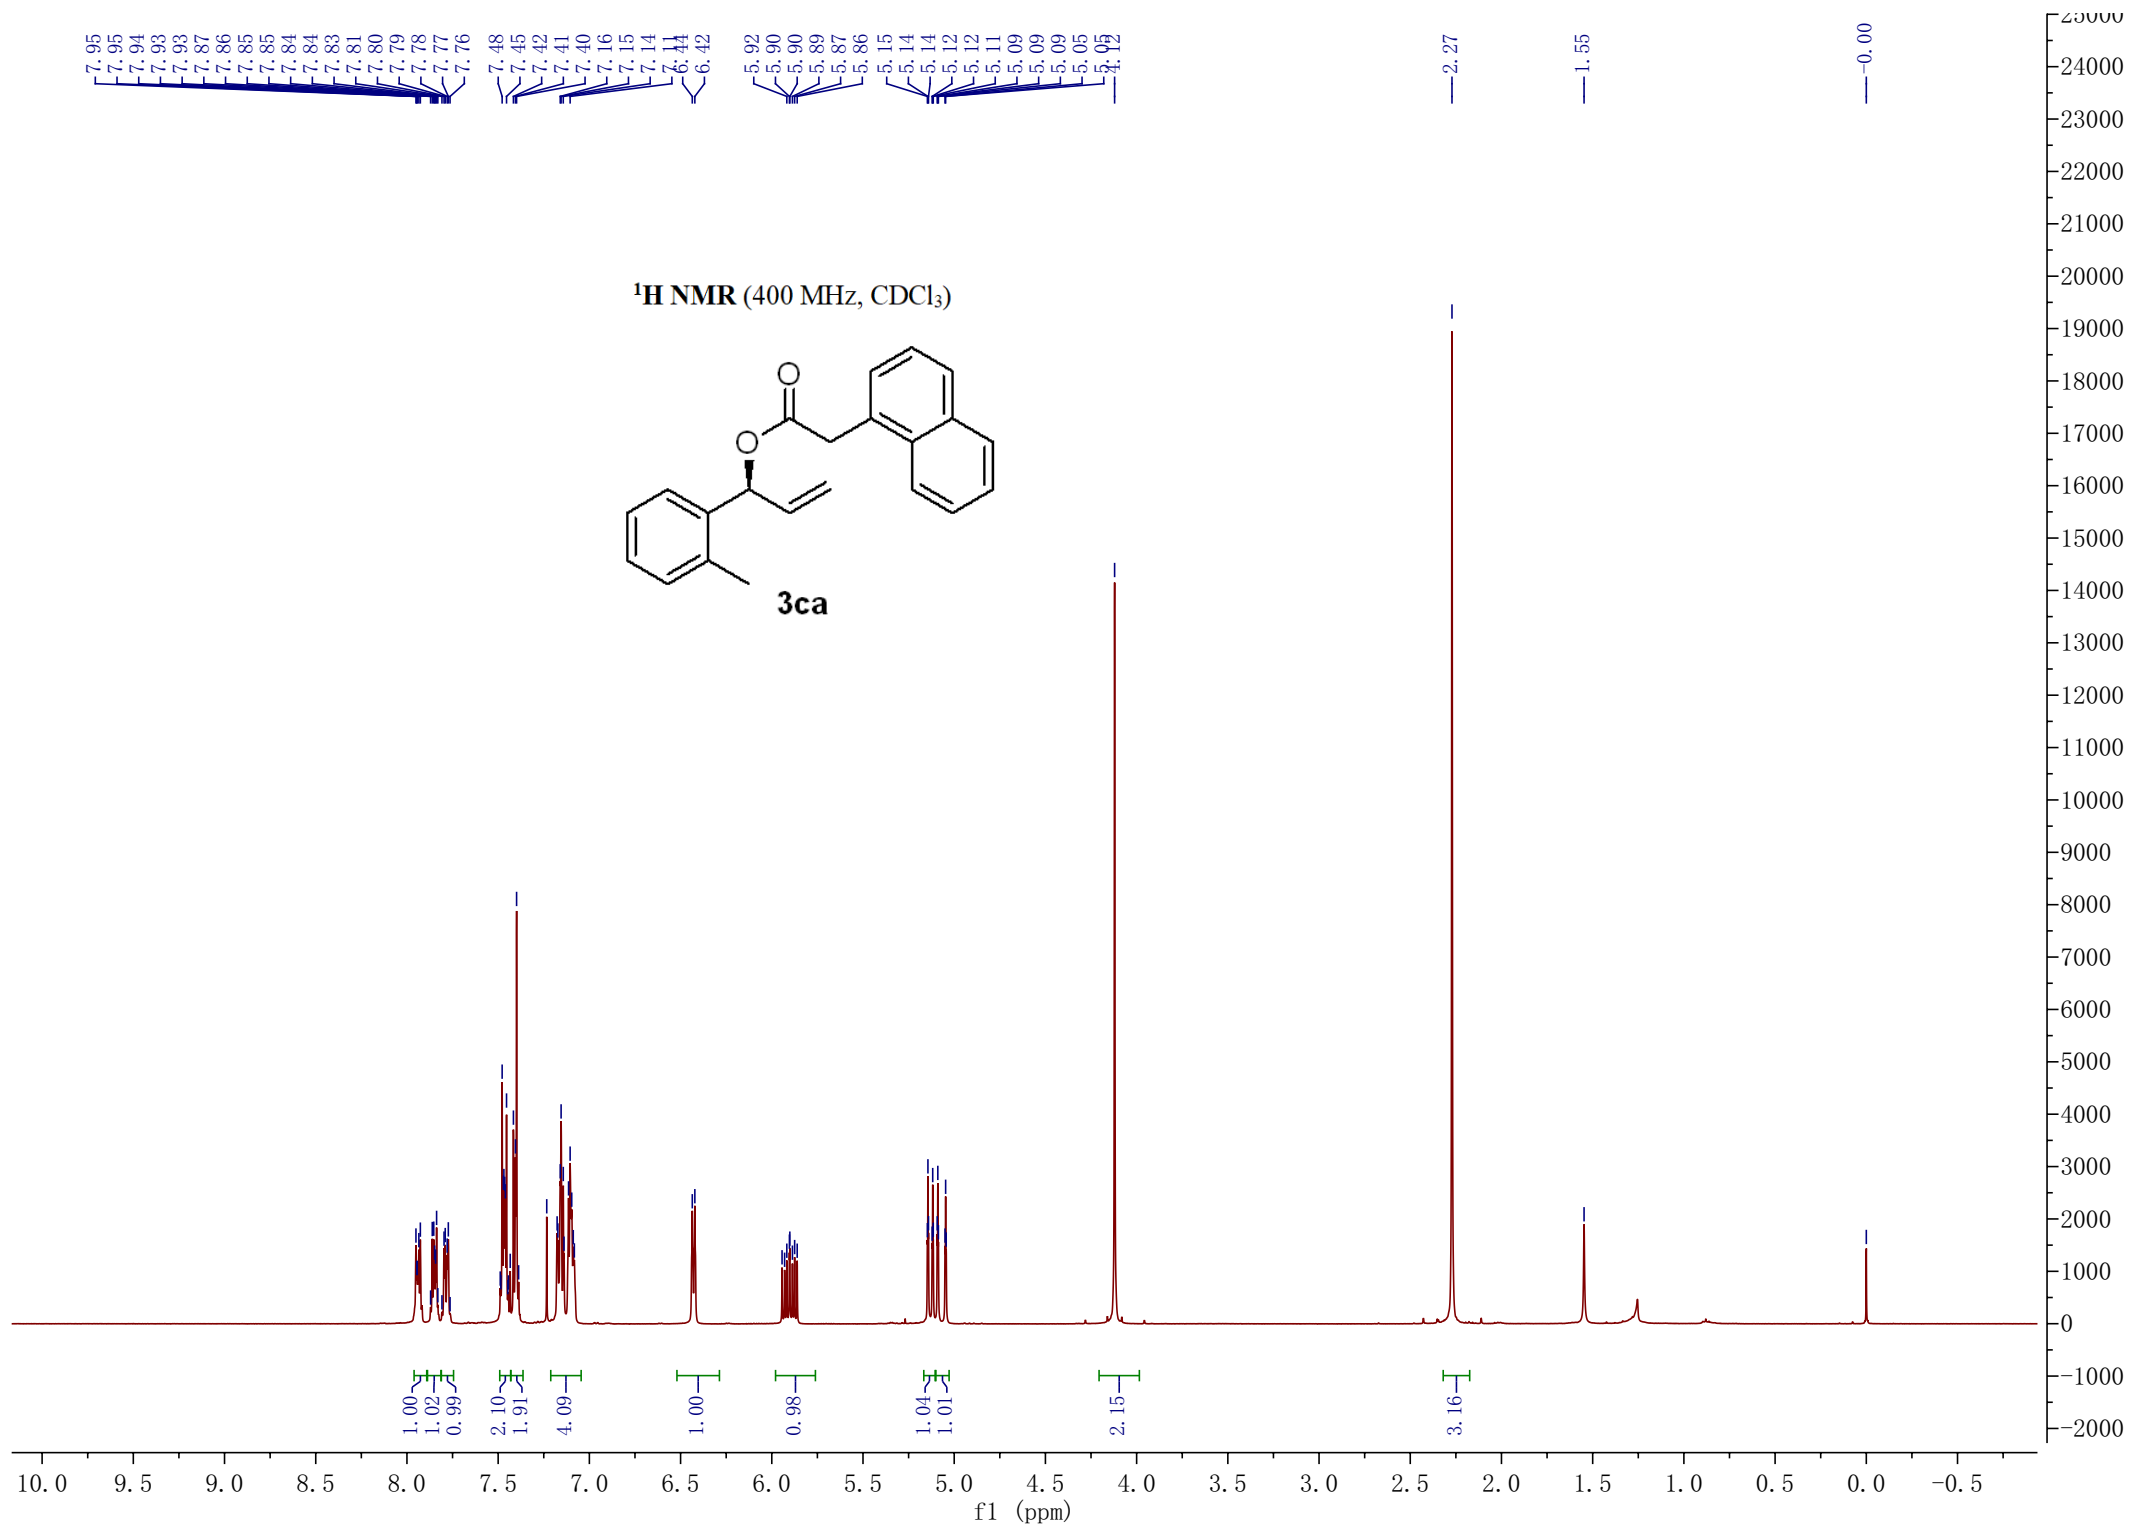

170.60  
136.94  
135.78  
135.55  
133.92  
132.20  
130.57  
128.79  
128.20  
128.16  
128.07  
126.88  
126.43  
126.21  
125.89  
125.57  
123.98  
117.06

<sup>13</sup>C NMR (100 MHz, CDCl<sub>3</sub>)

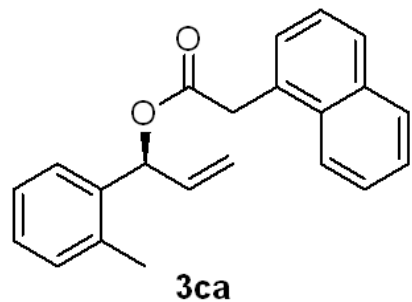

77.48  
77.16  
76.84  
74.08

39.47

19.24

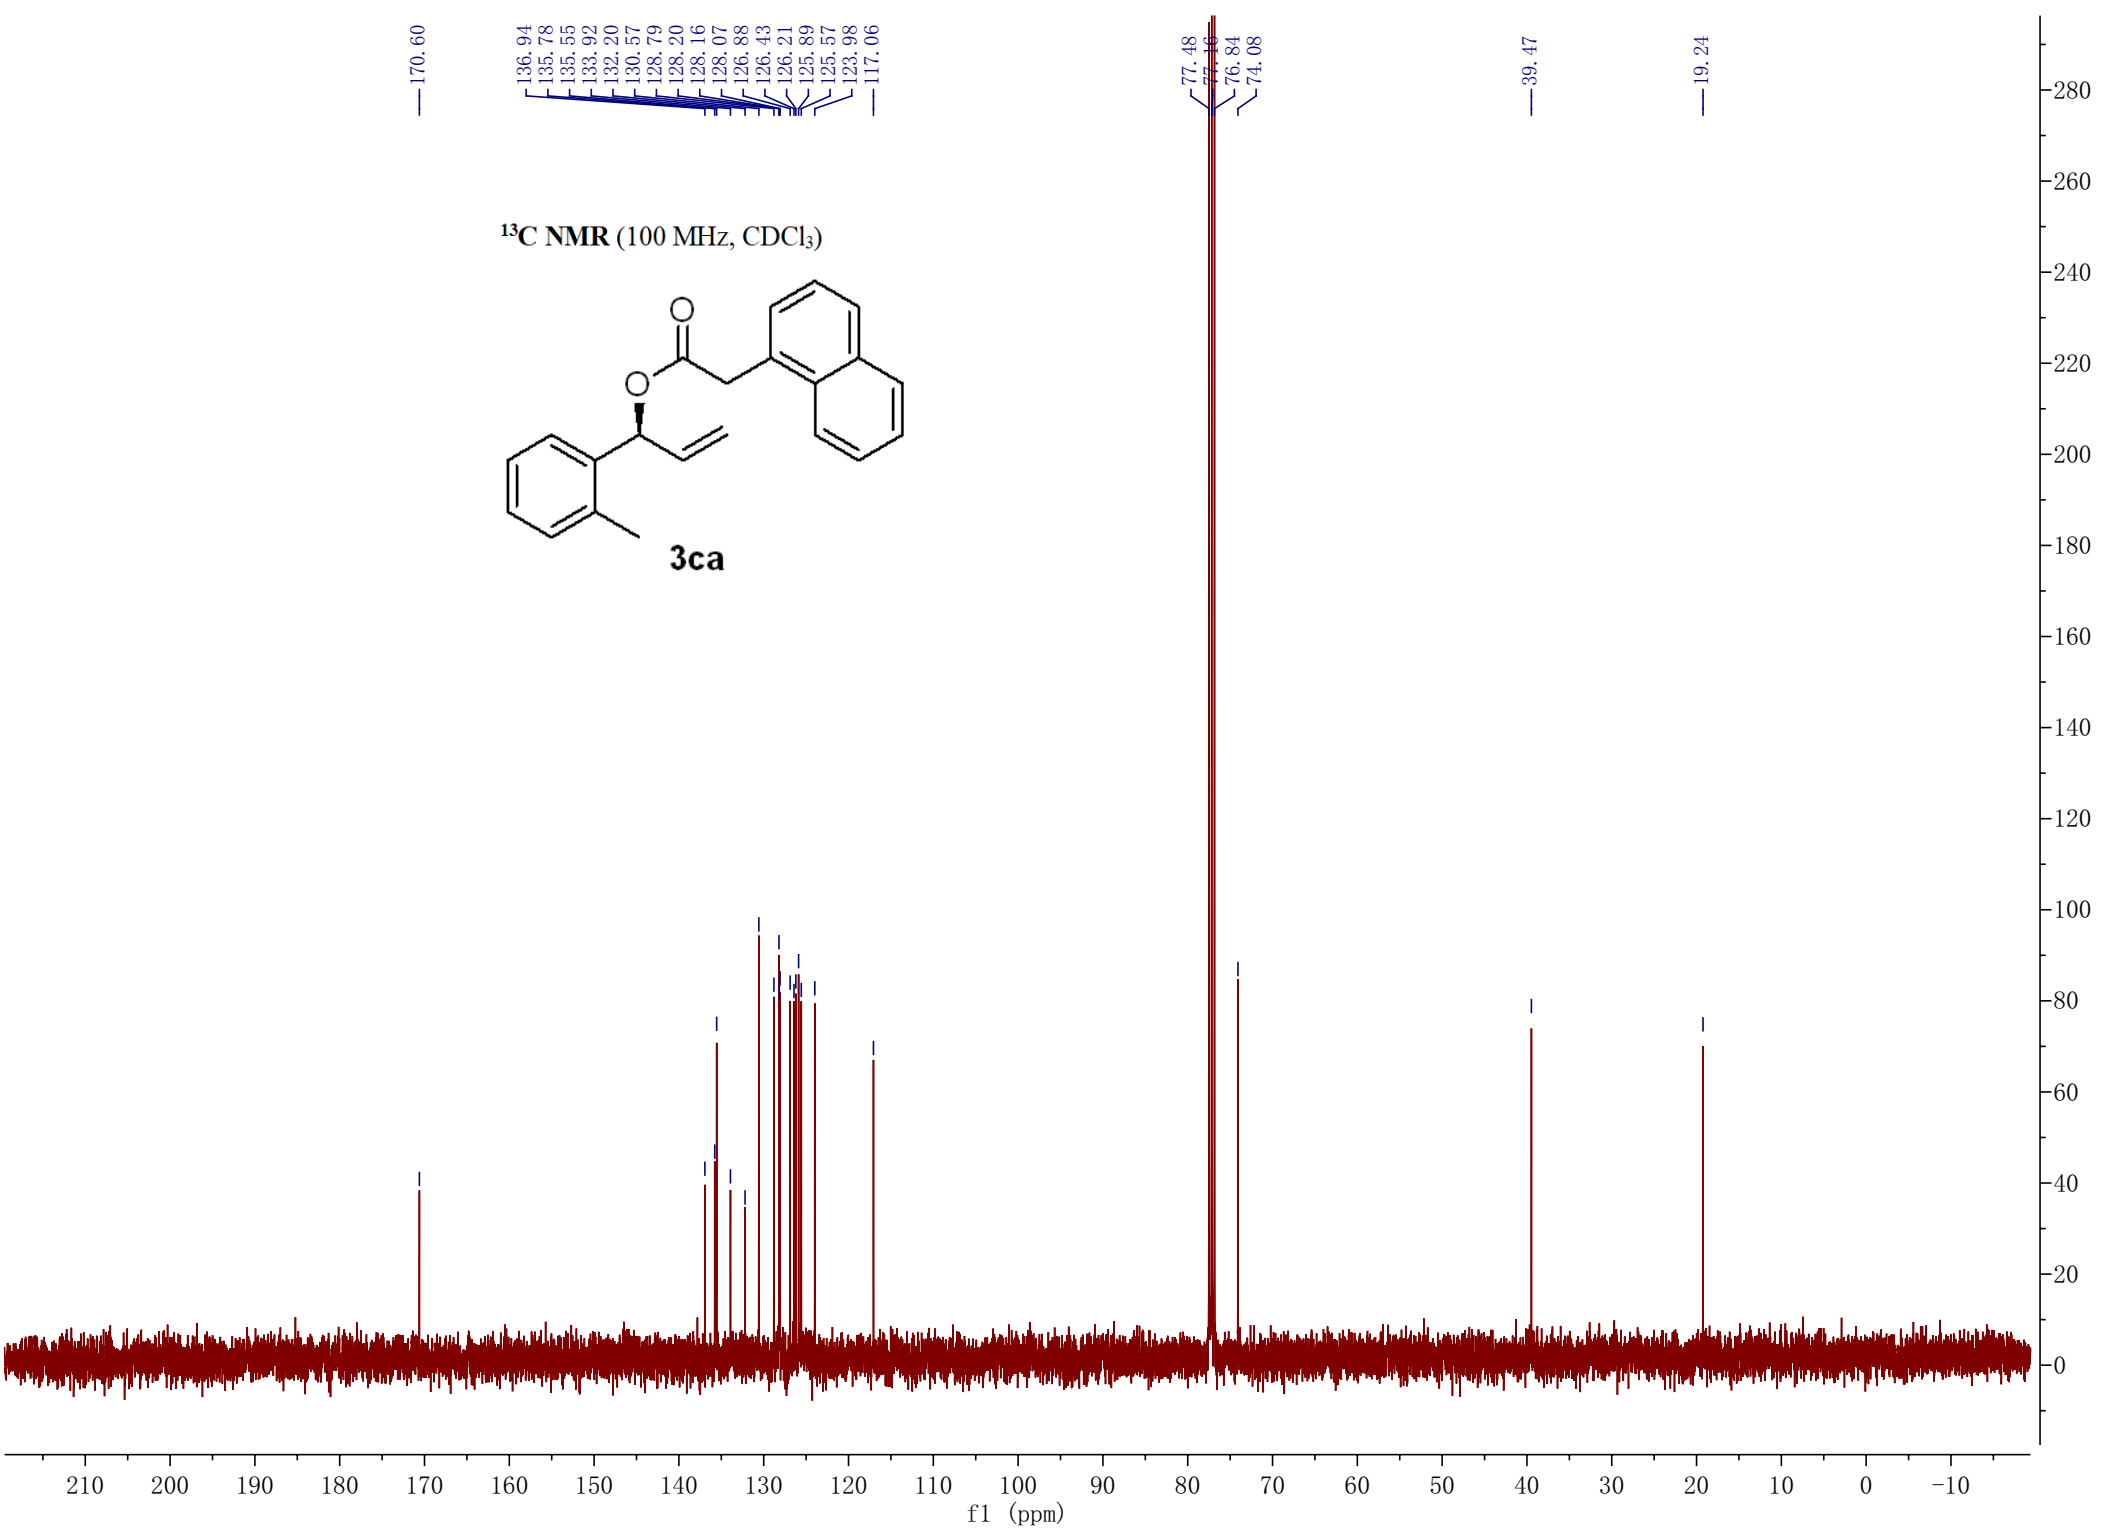

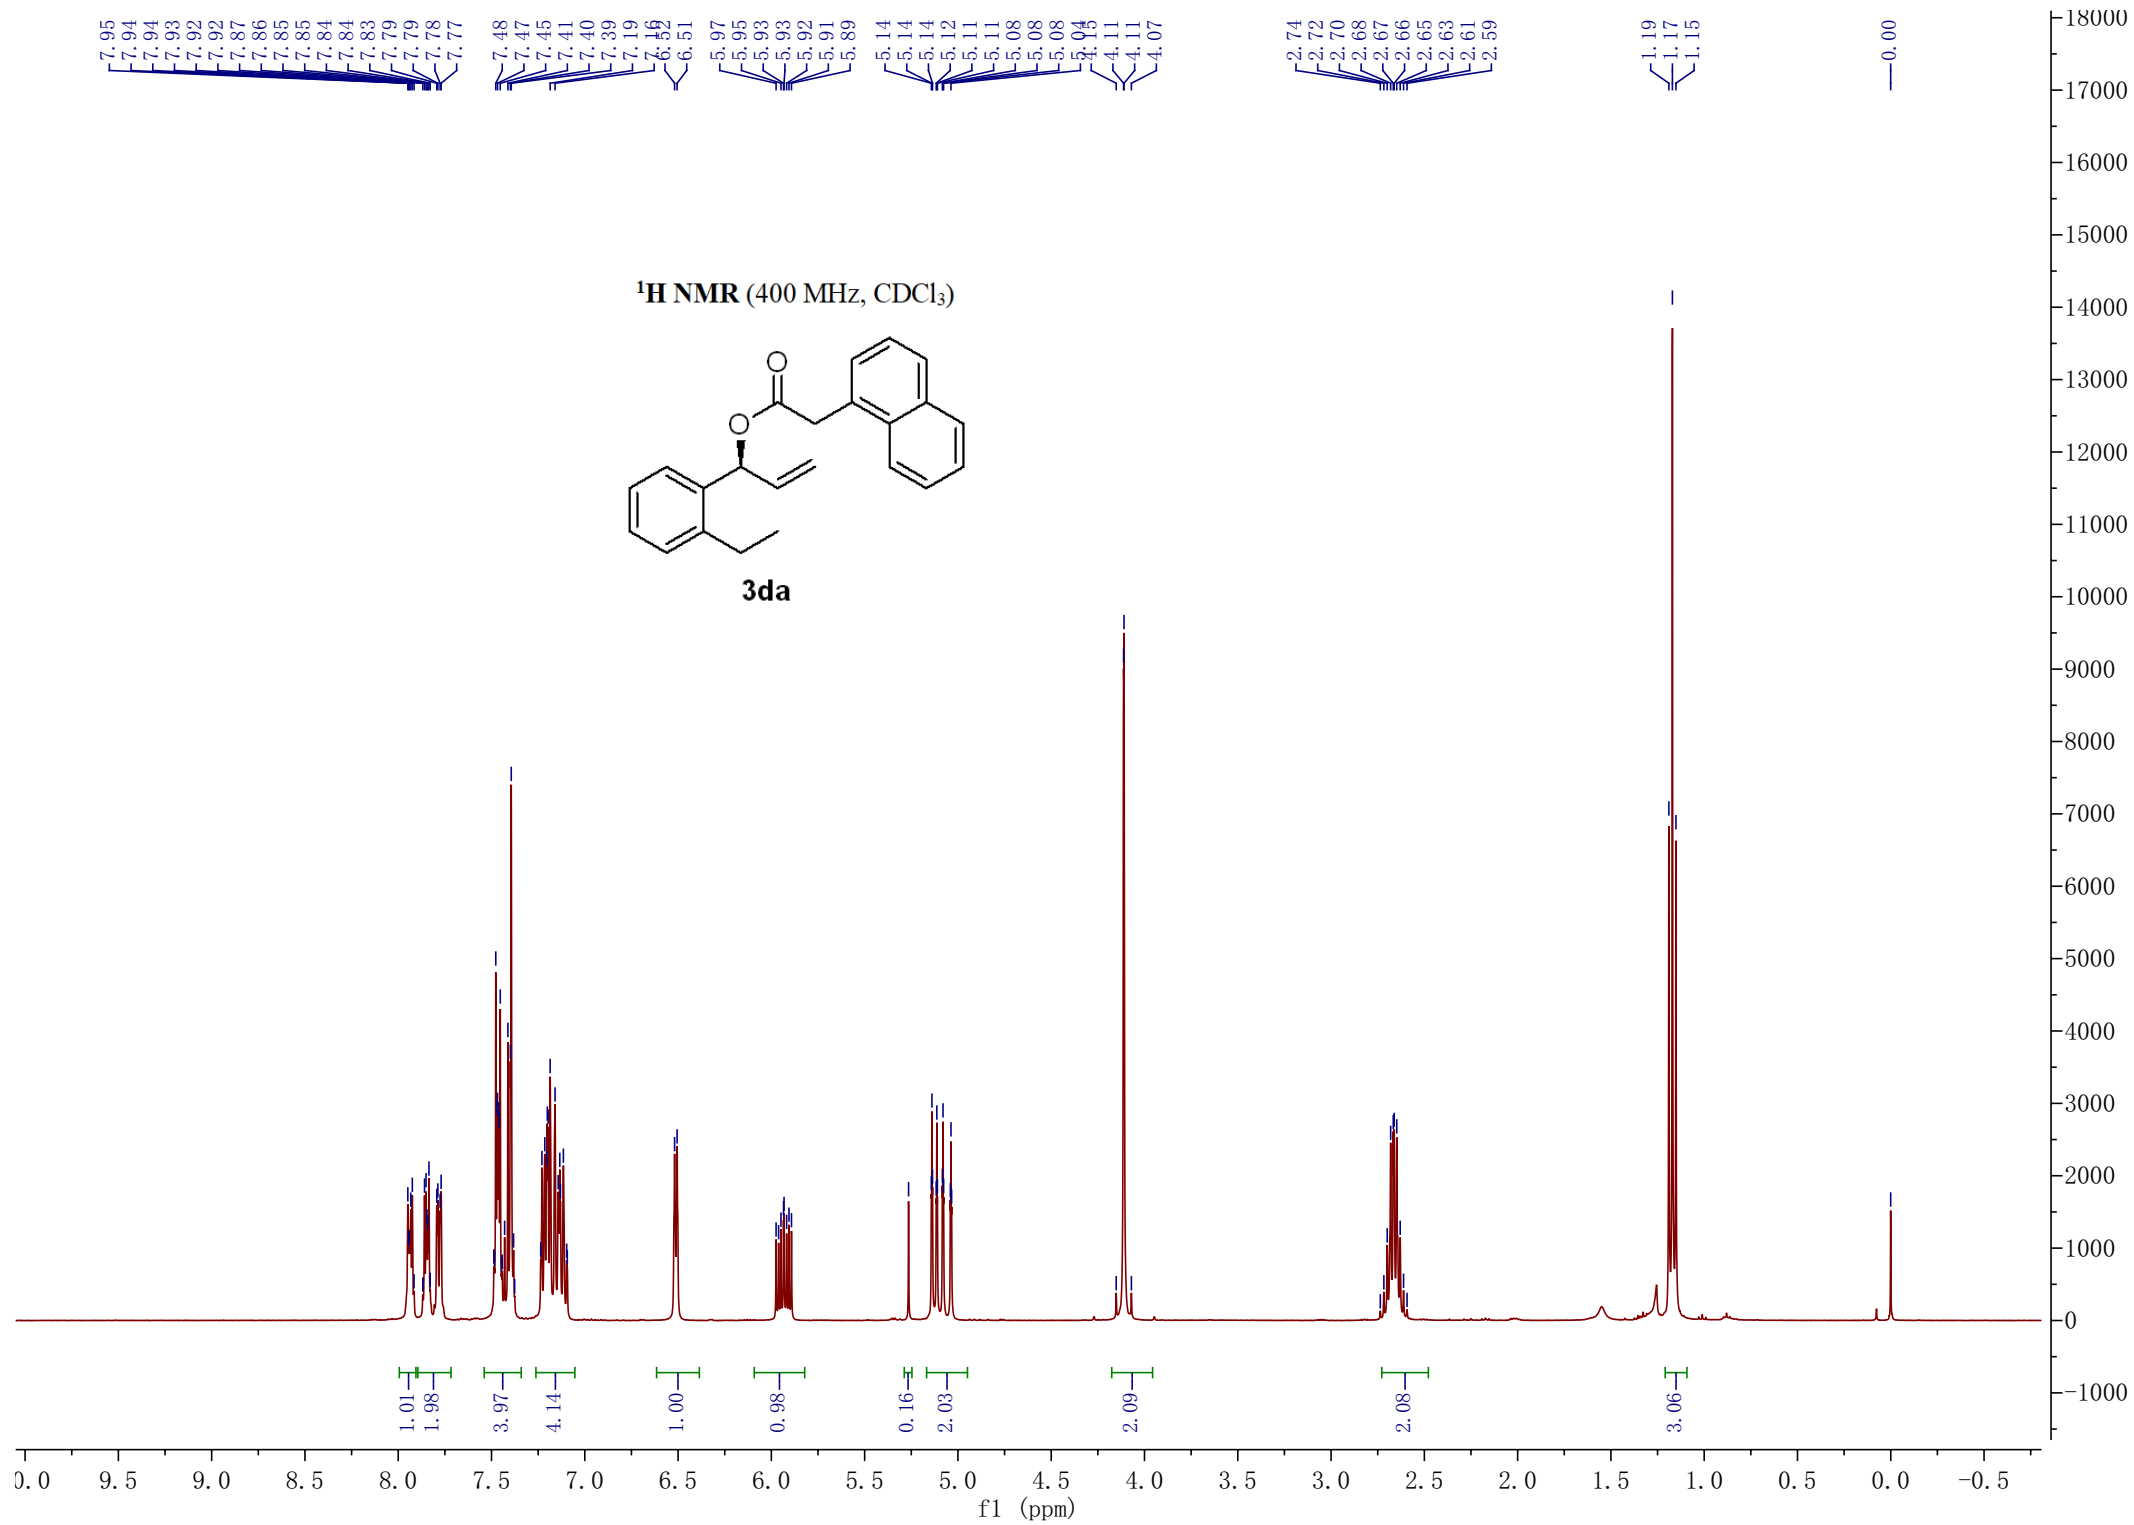

170.62

141.81

128.79

128.75

128.32

128.19

128.16

127.32

126.18

116.99

77.48

77.16

76.84

73.41

39.49

25.48

15.40

<sup>13</sup>C NMR (100 MHz, CDCl<sub>3</sub>)

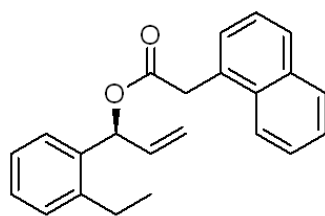

**3da**

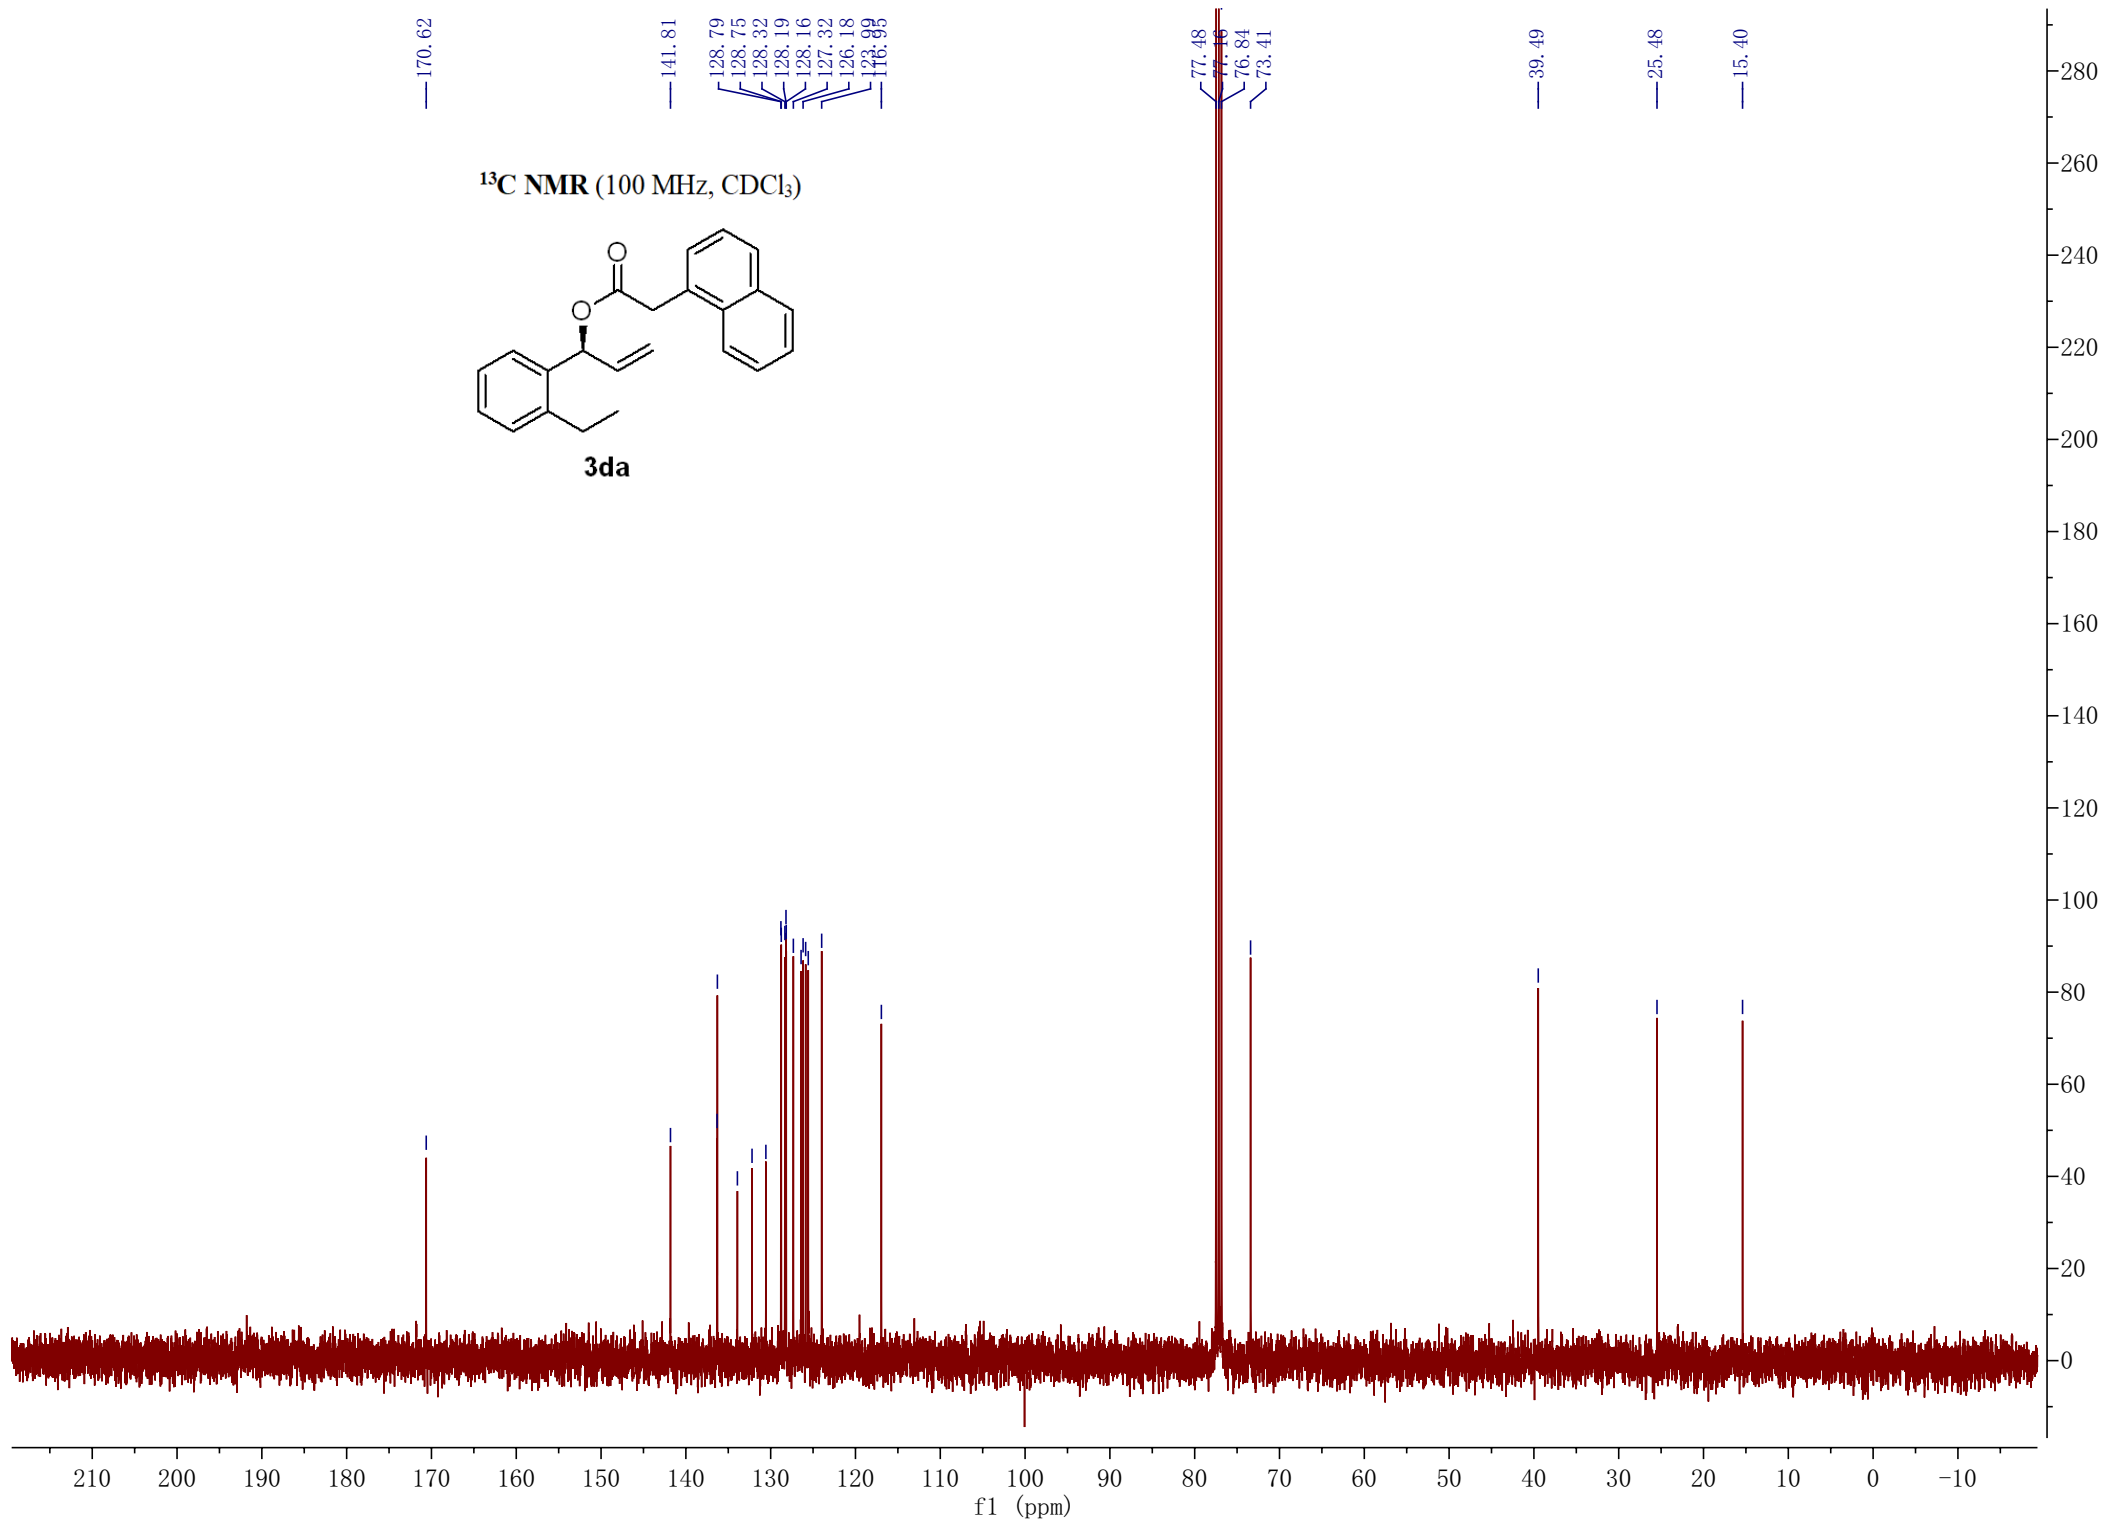

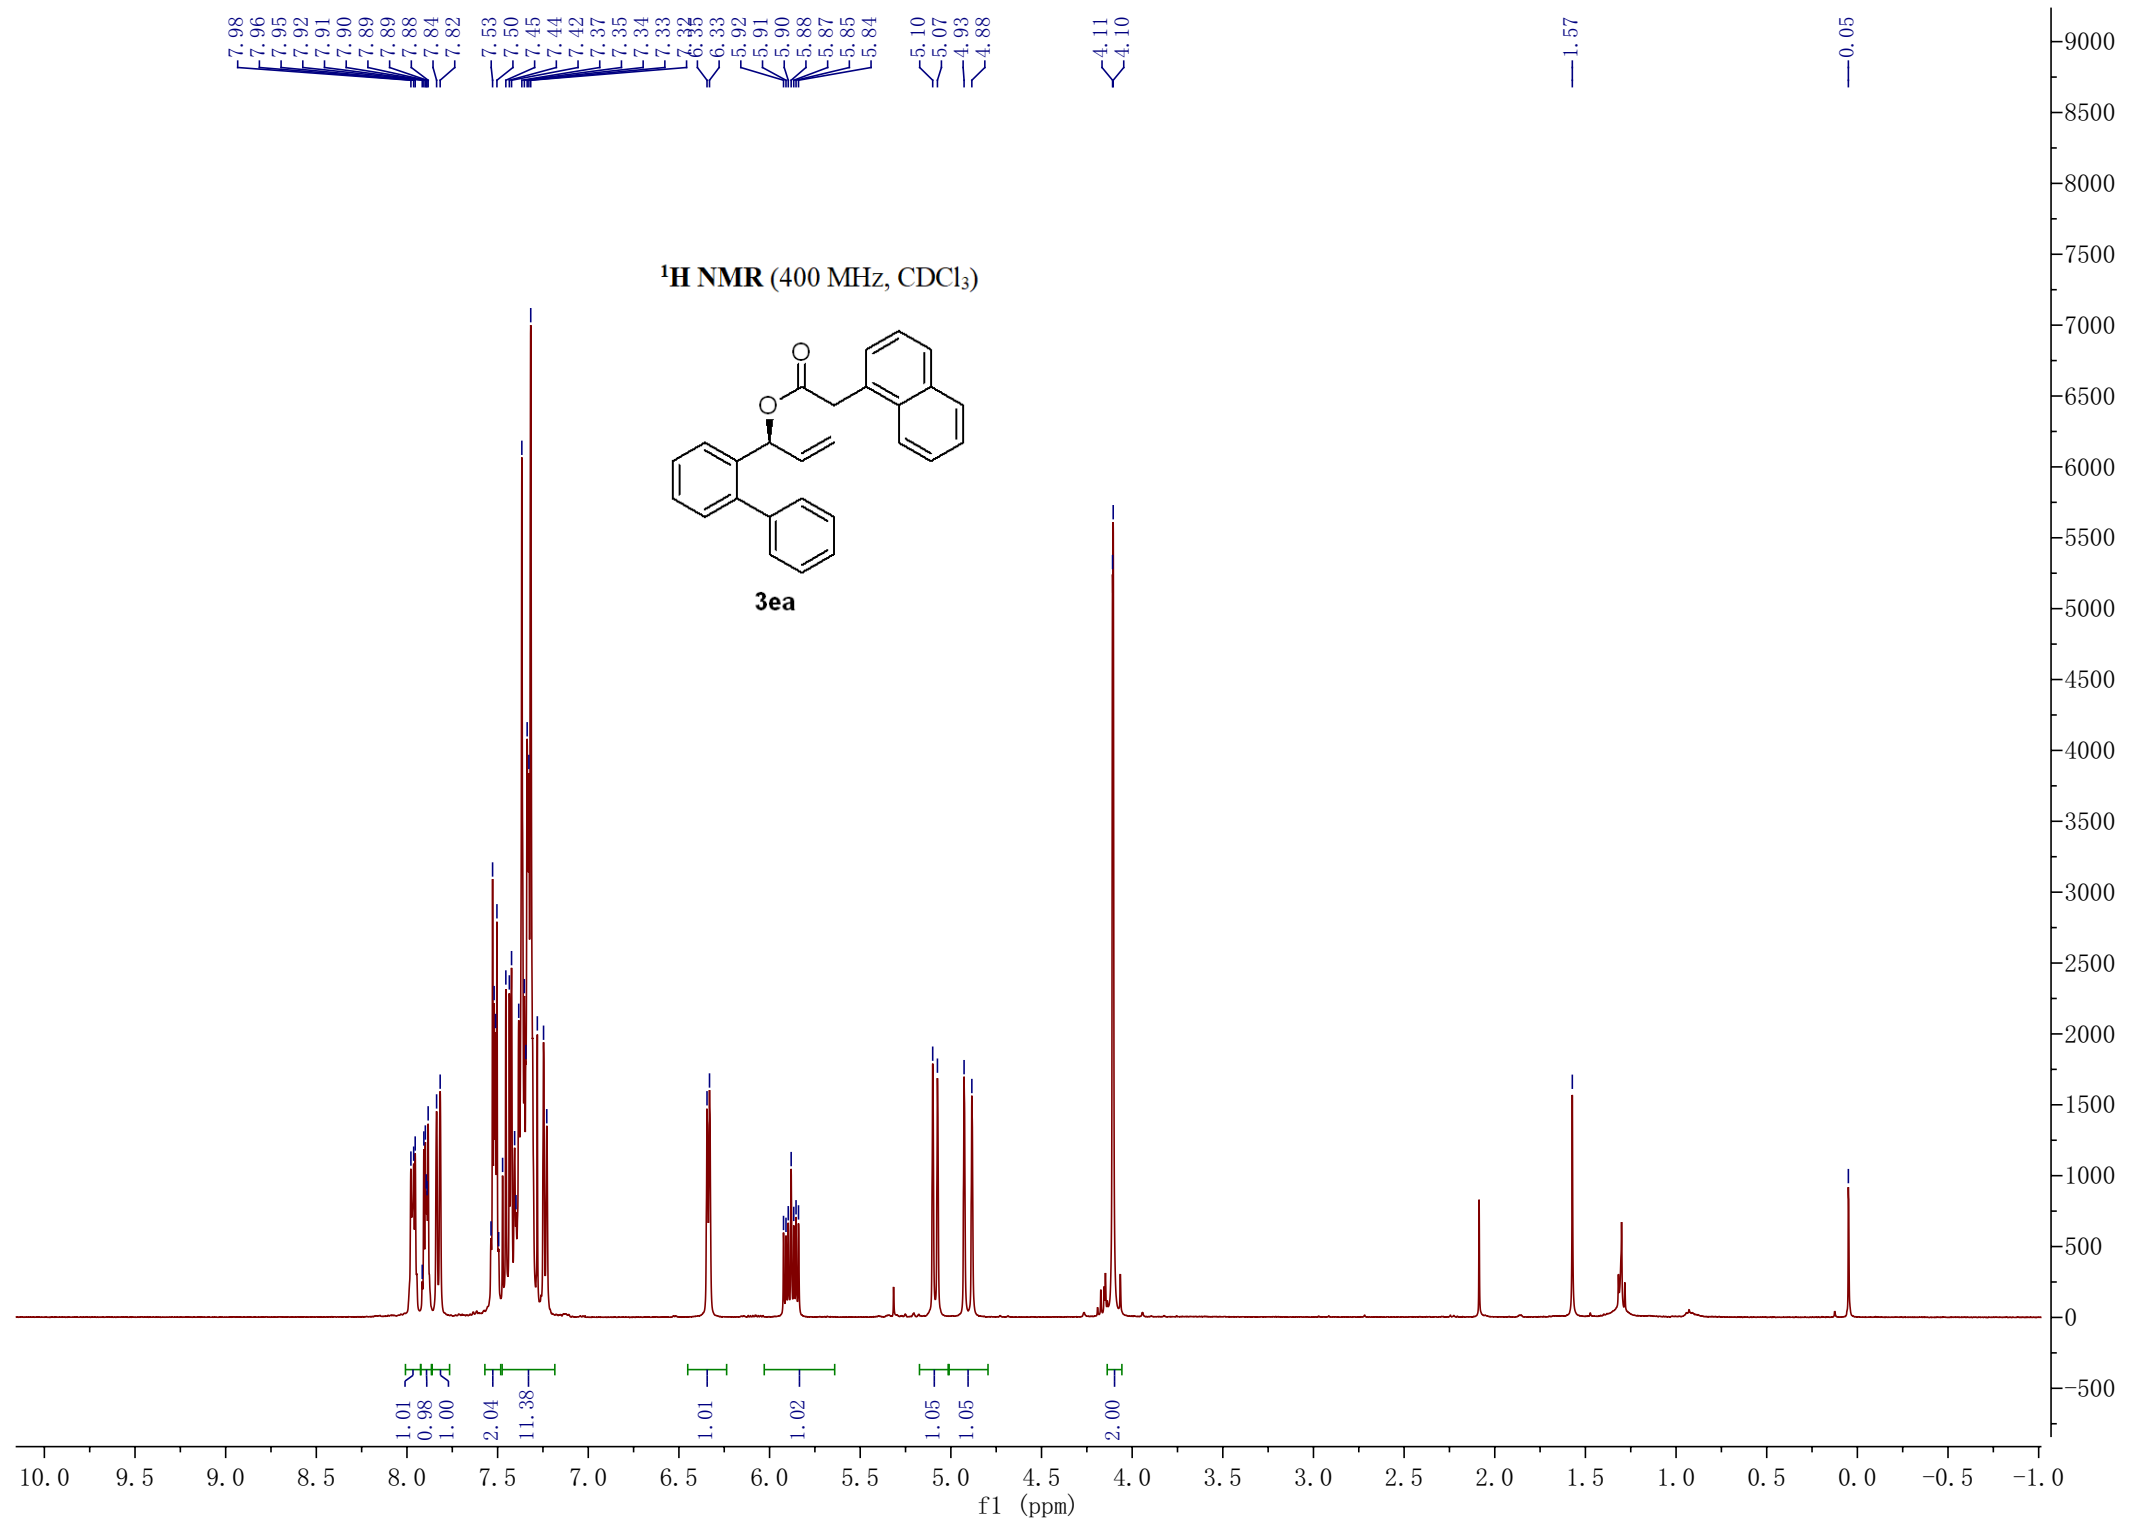



<sup>13</sup>C NMR (100 MHz, CDCl<sub>3</sub>)

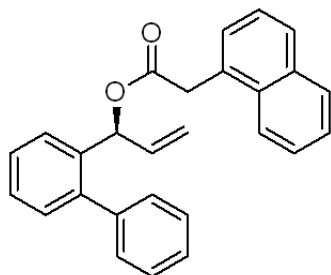

**3ea**

170.19  
141.52  
140.47  
136.46  
136.35  
133.92  
130.56  
130.14  
129.30  
128.79  
128.26  
128.17  
127.86  
127.72  
127.40  
126.95  
126.39  
125.88  
125.58  
124.94

77.48  
77.16  
76.84  
74.08

39.43

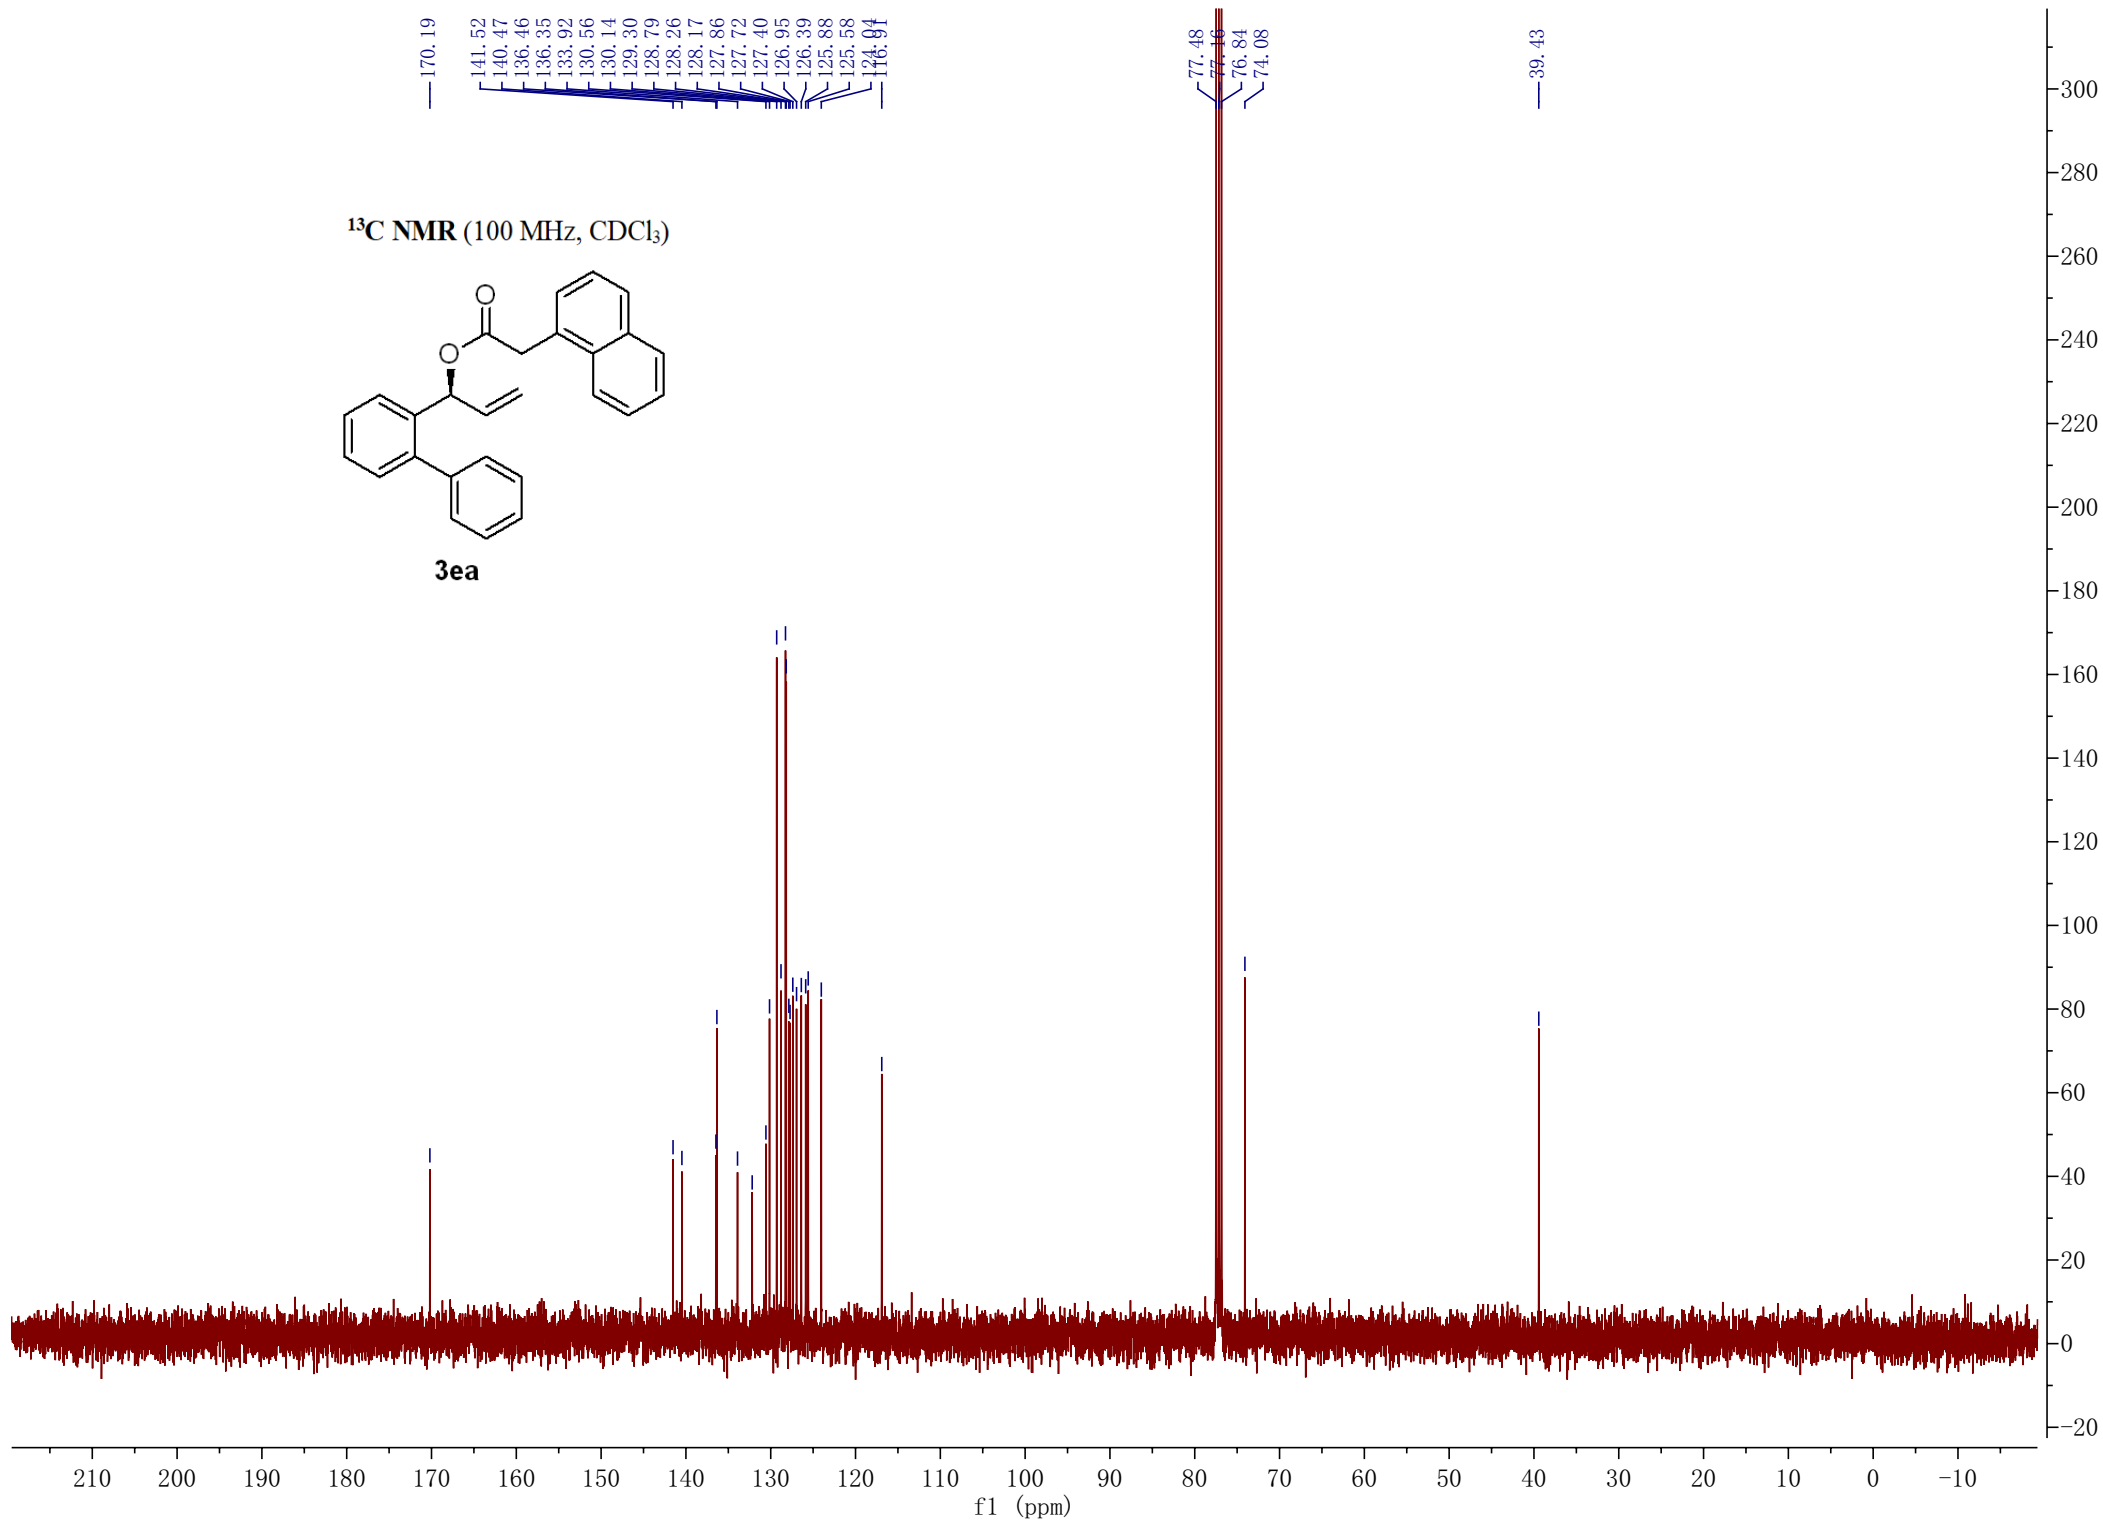

<sup>1</sup>H NMR (400 MHz, CDCl<sub>3</sub>)

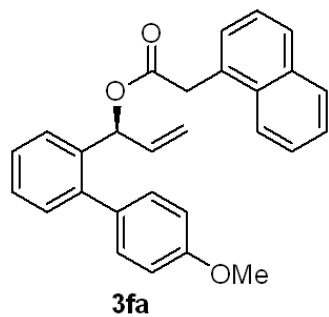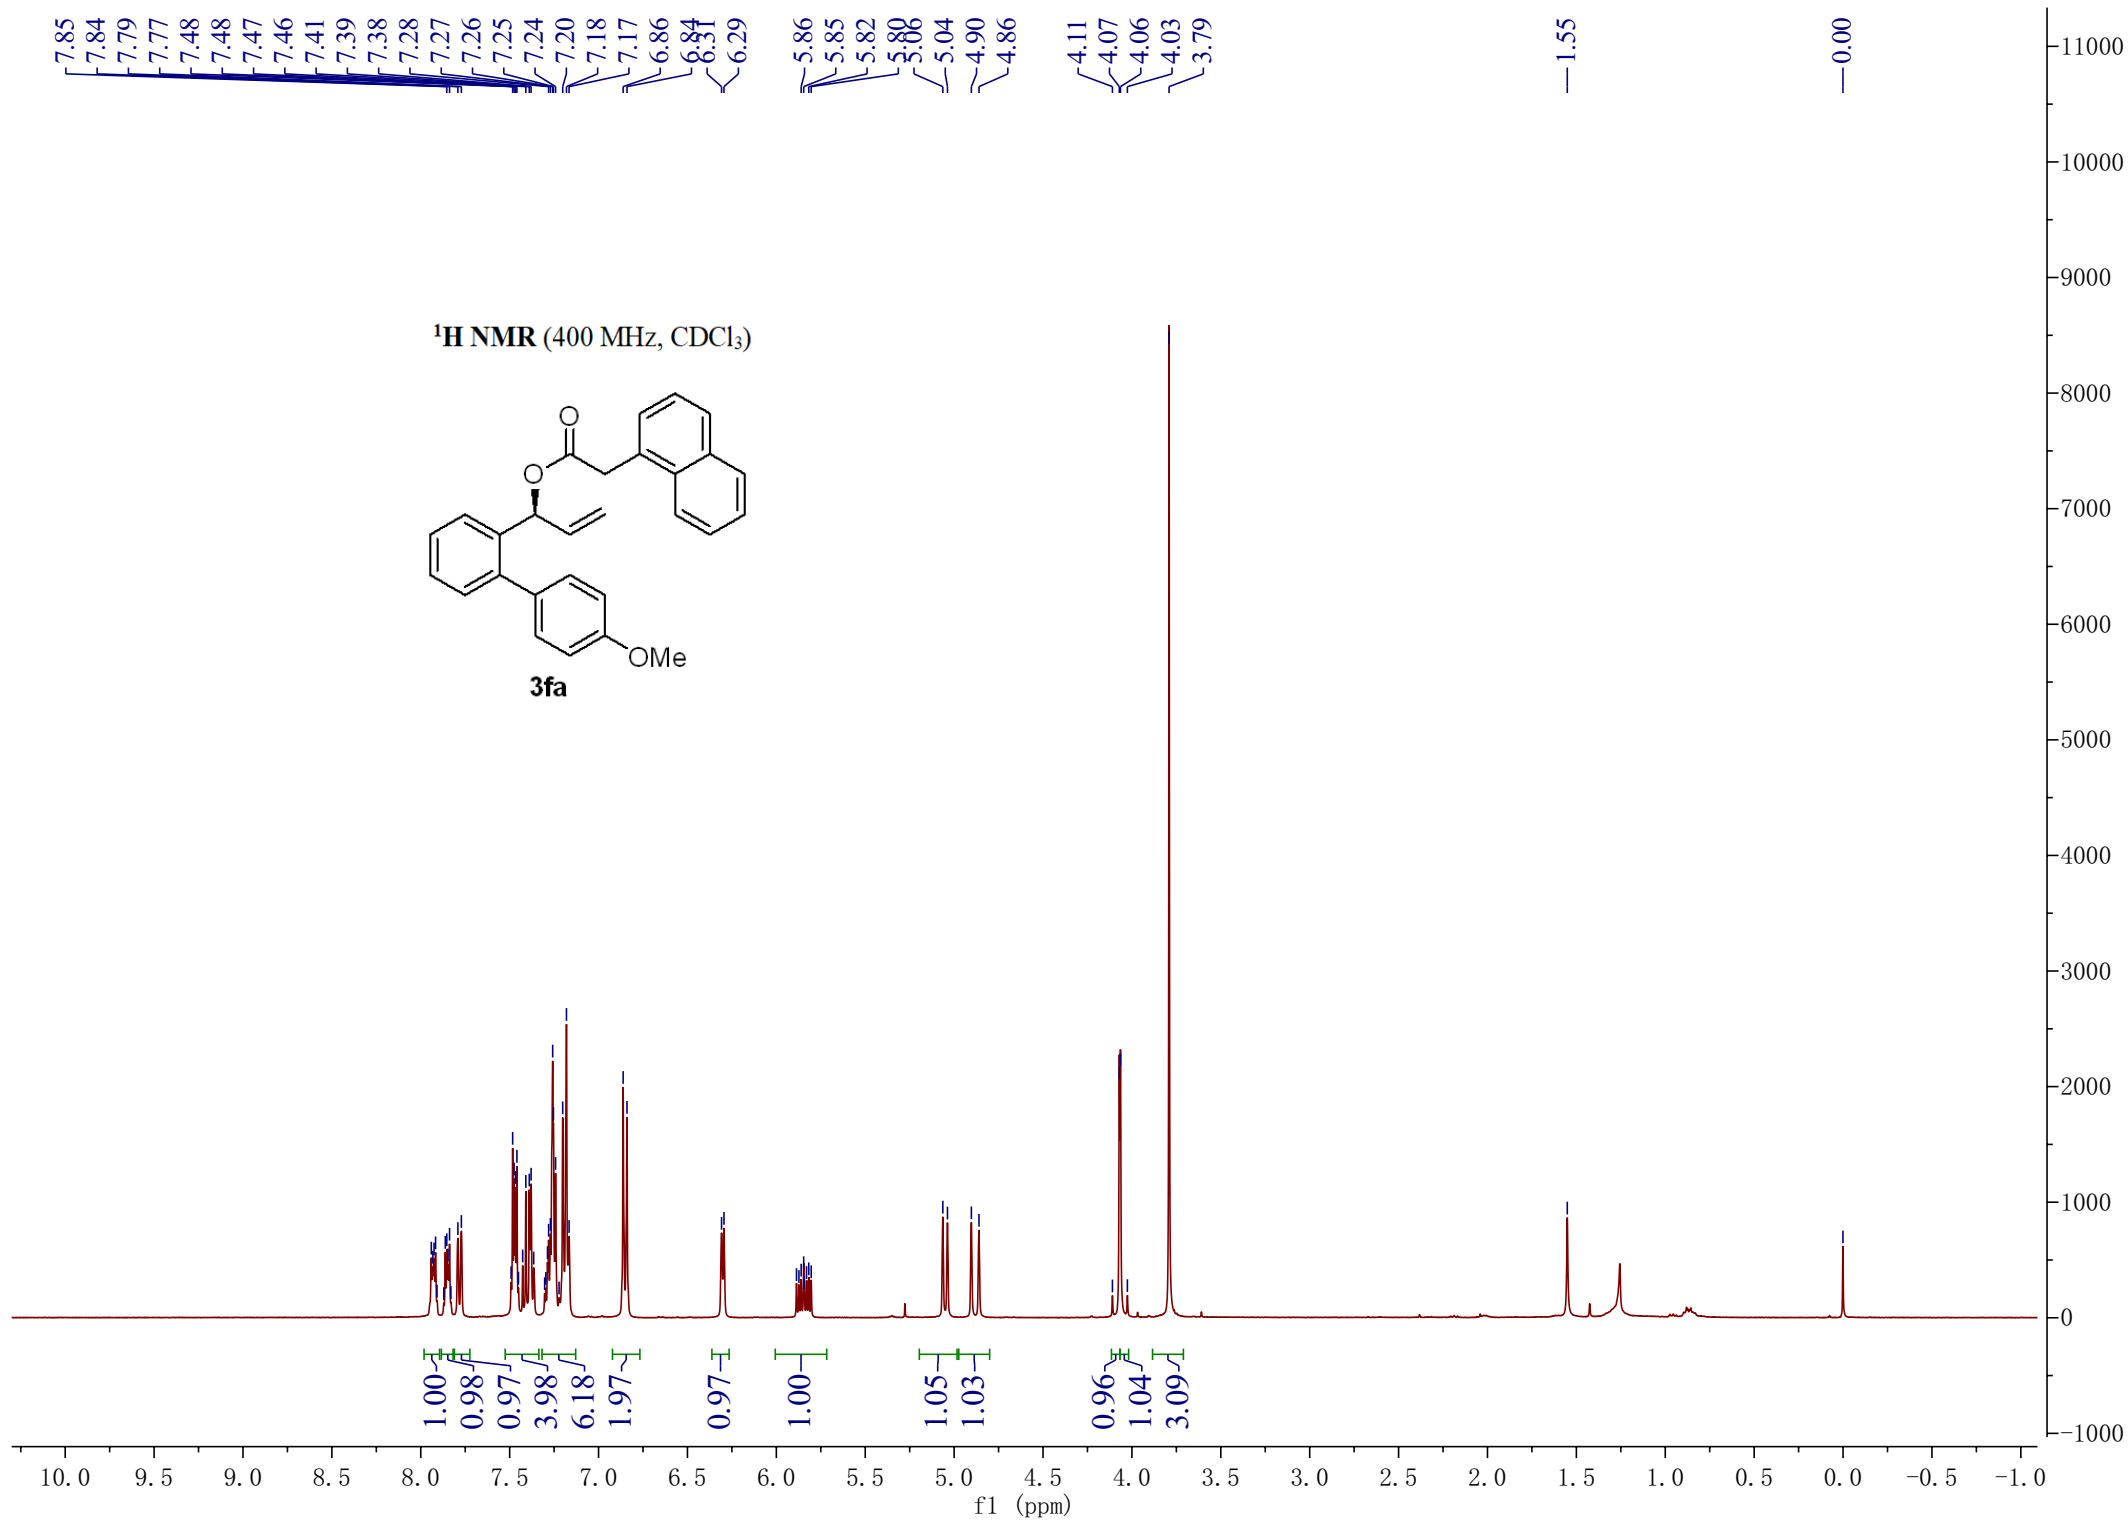

<sup>13</sup>C NMR (100 MHz, CDCl<sub>3</sub>)

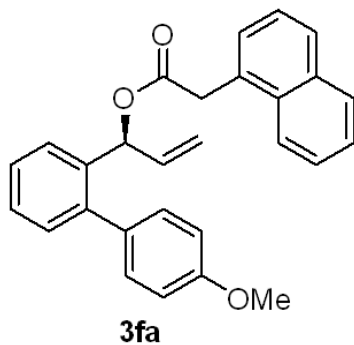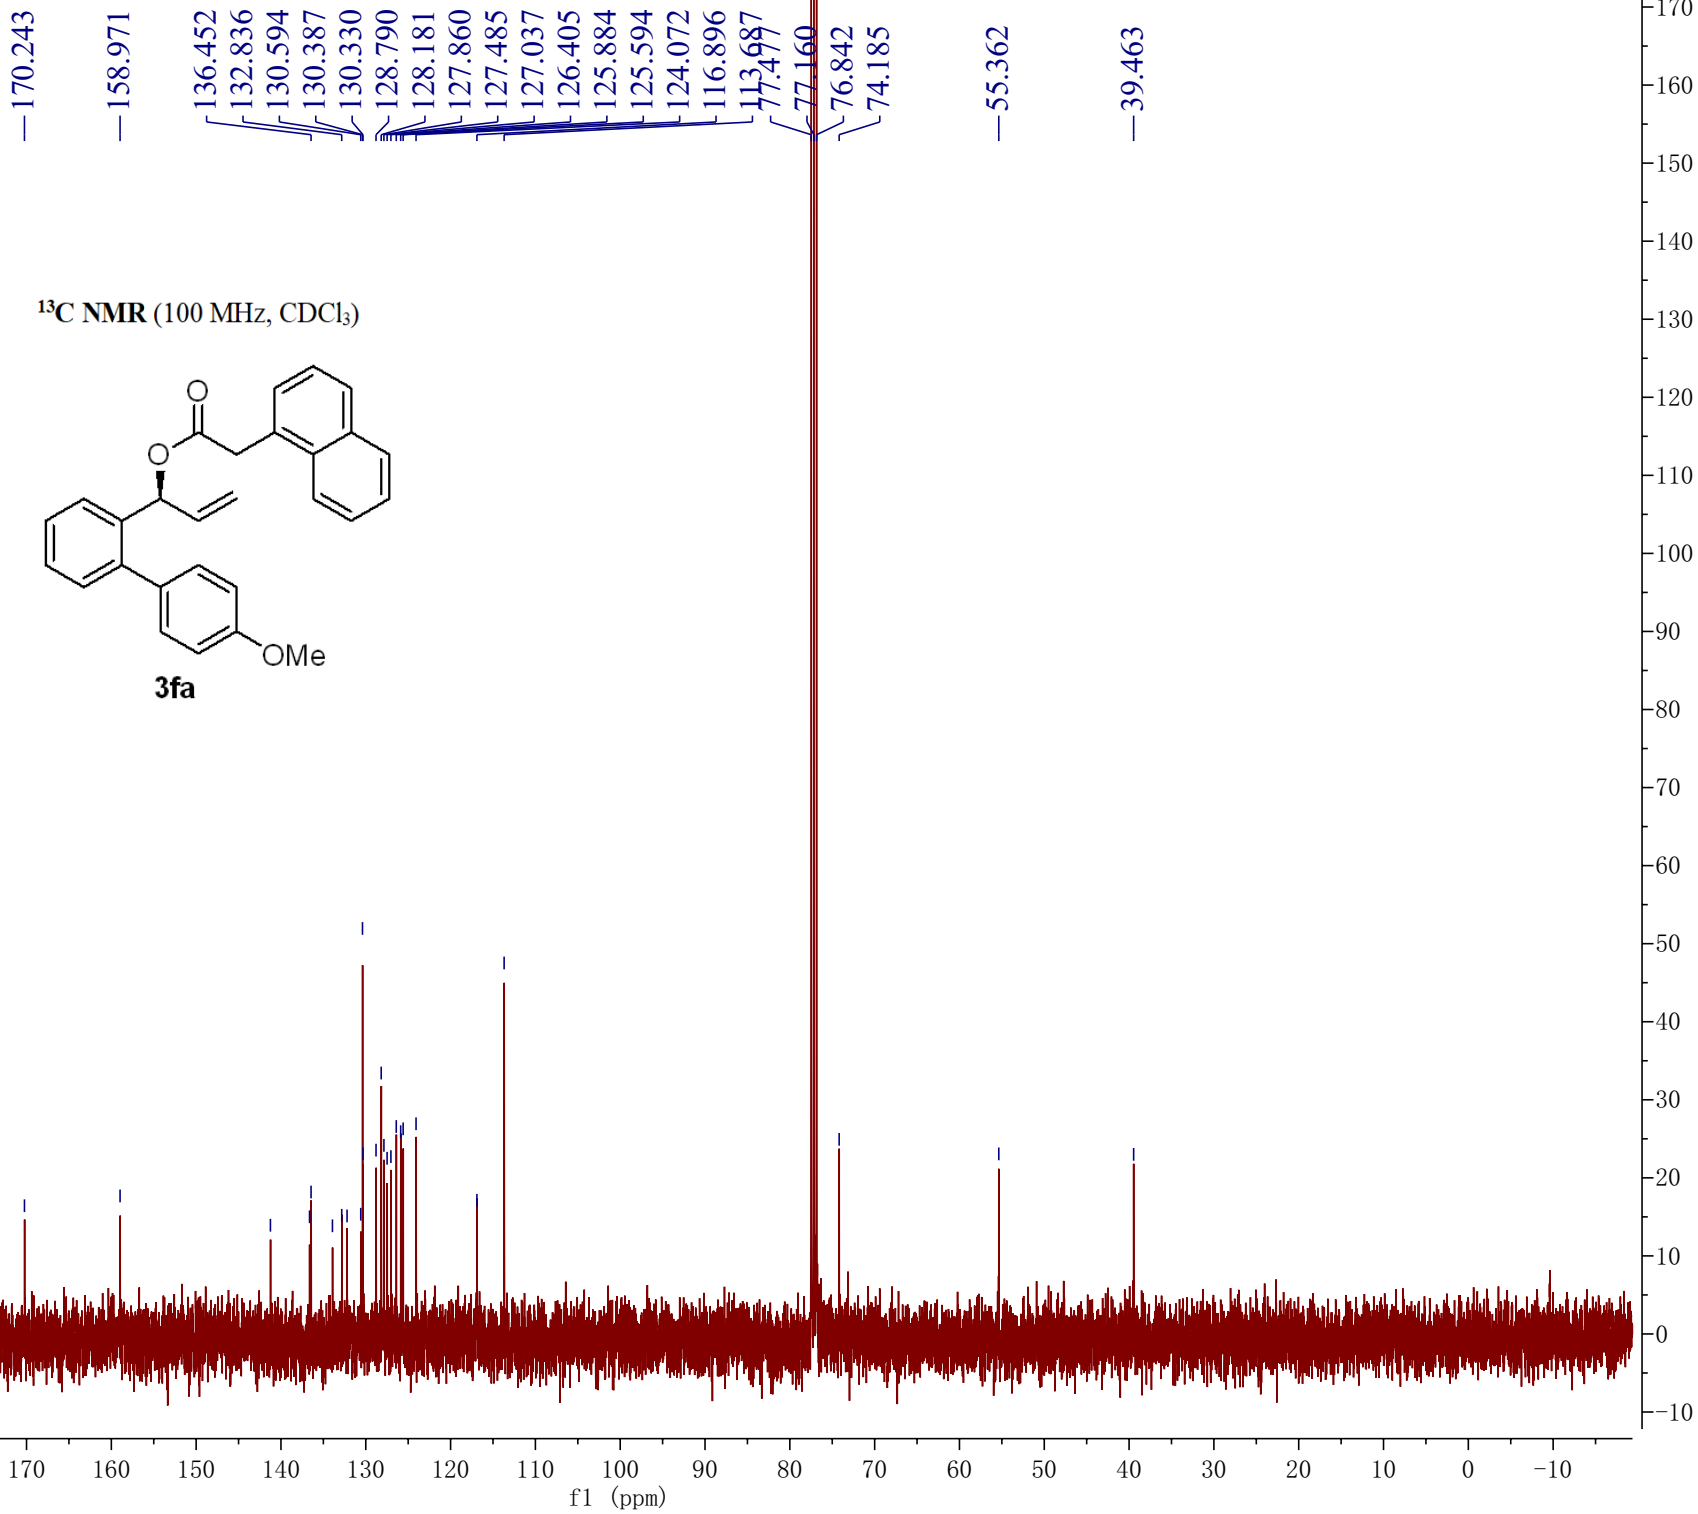

<sup>1</sup>H NMR (400 MHz, CDCl<sub>3</sub>)

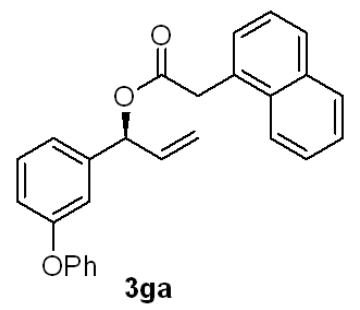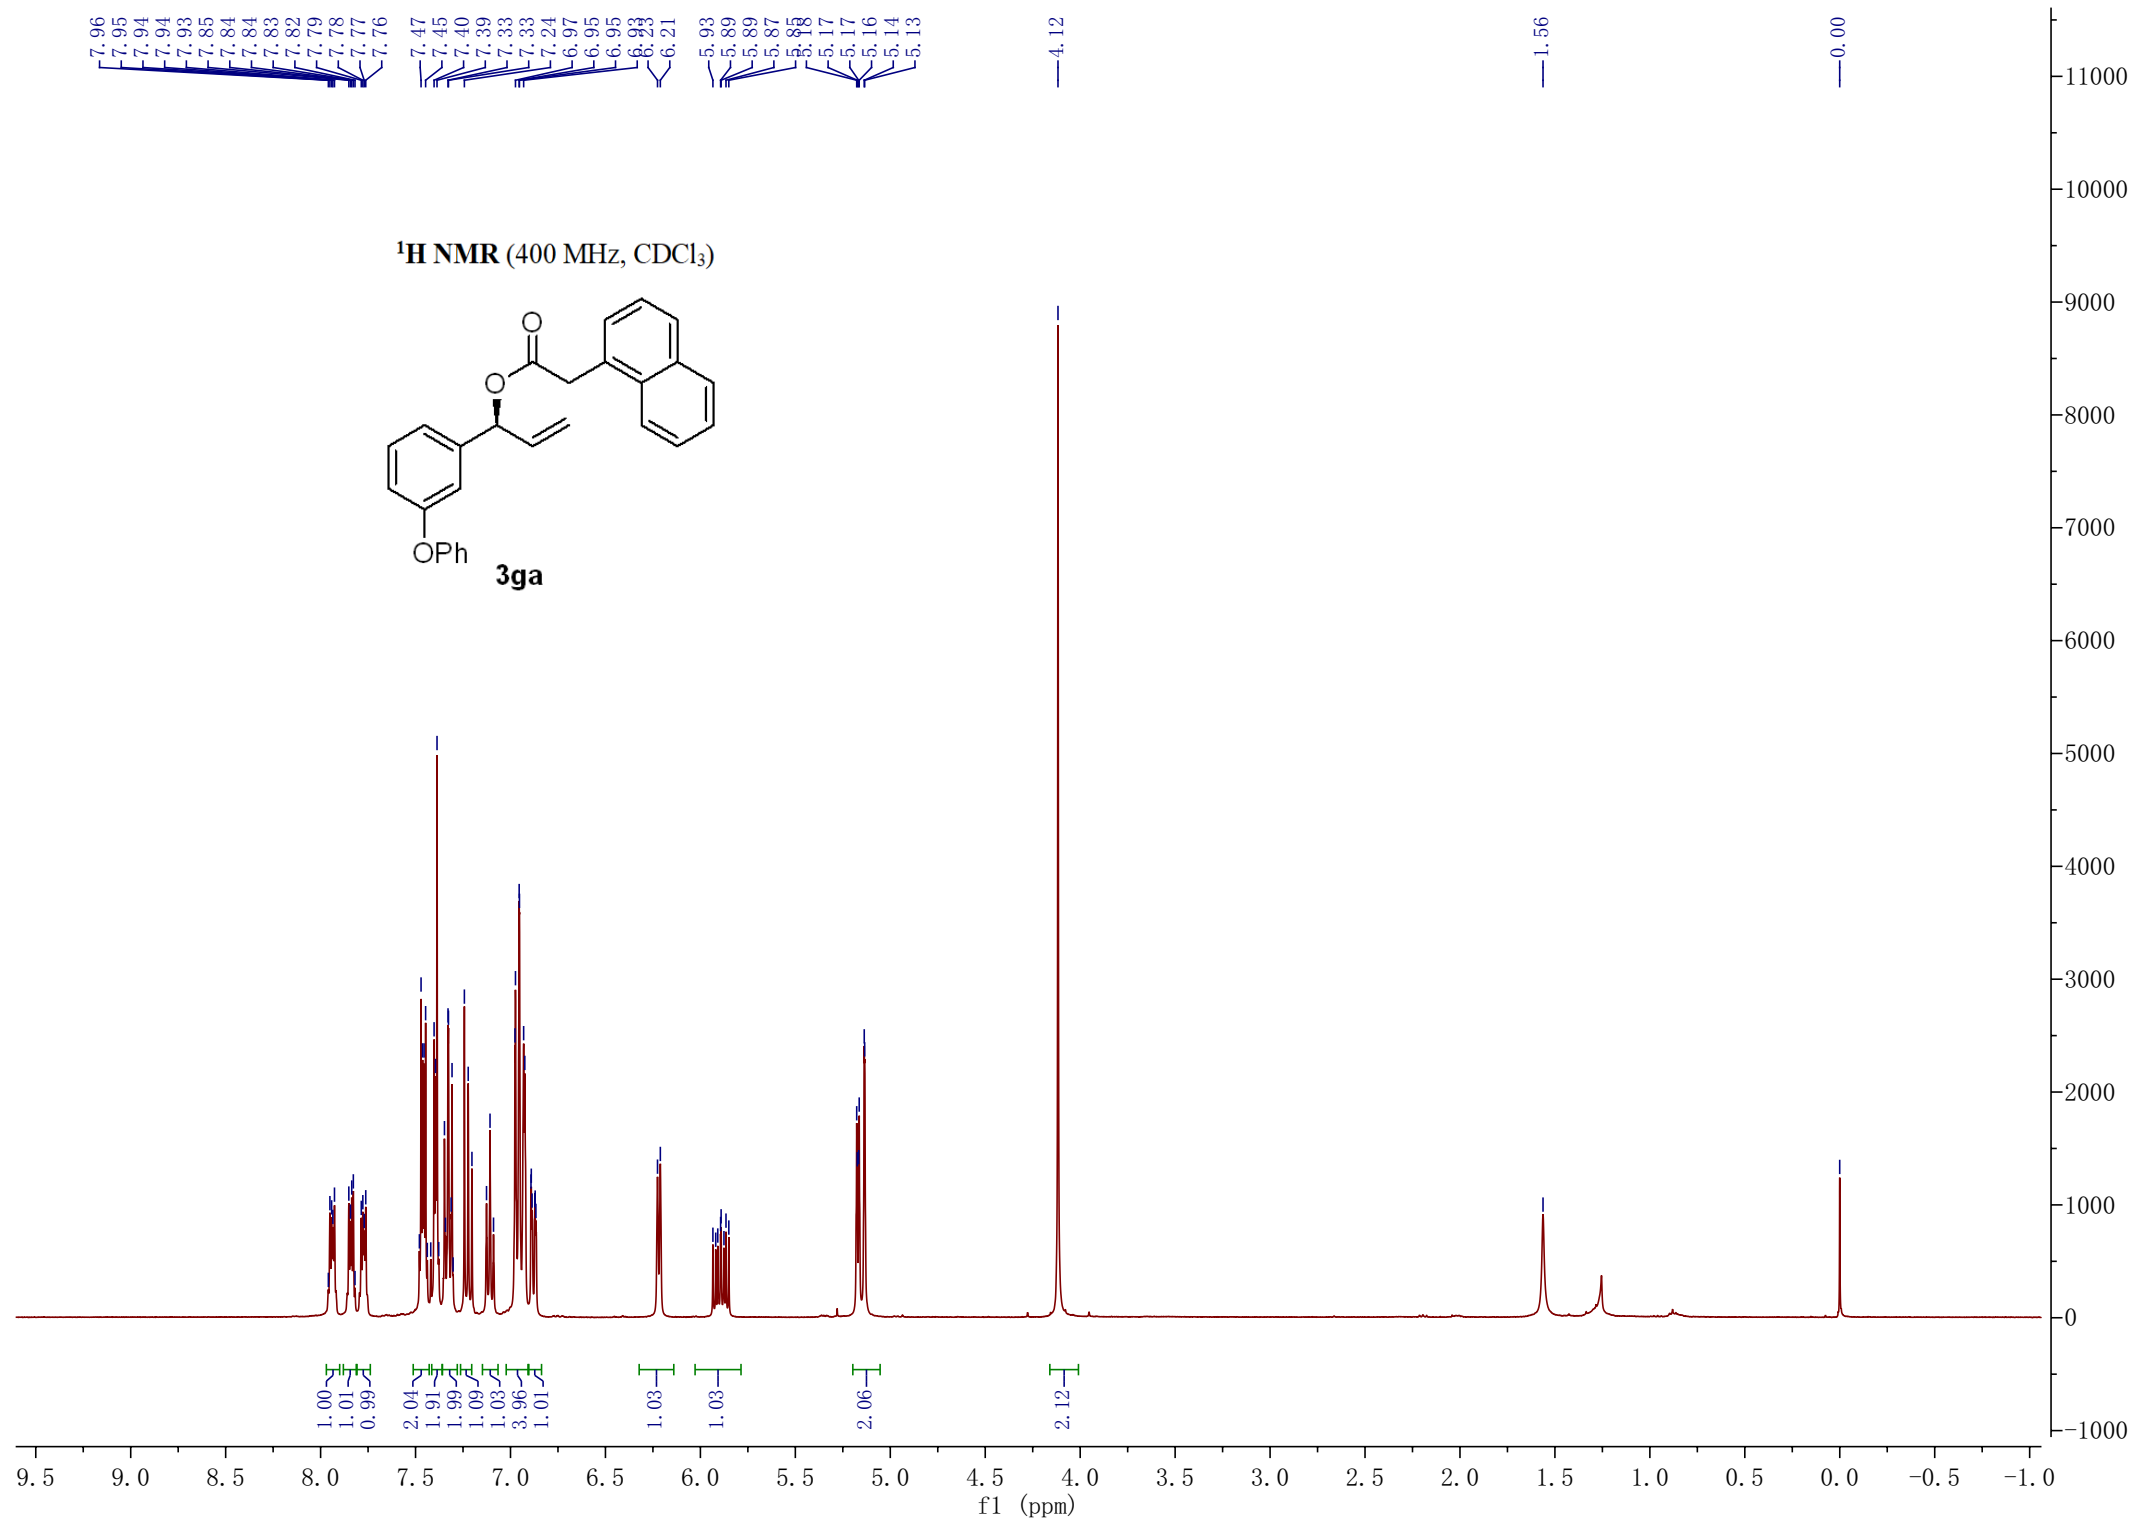

<sup>13</sup>C NMR (100 MHz, CDCl<sub>3</sub>)

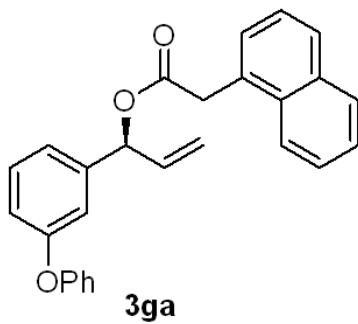

170.53  
157.40  
157.10  
140.89  
135.81  
133.92  
132.15  
130.46  
129.90  
128.82  
128.25  
128.14  
126.46  
125.90  
125.57  
123.92  
123.47  
121.86  
118.97  
118.41  
117.57  
117.43

77.48  
77.16  
76.84  
76.32

39.47

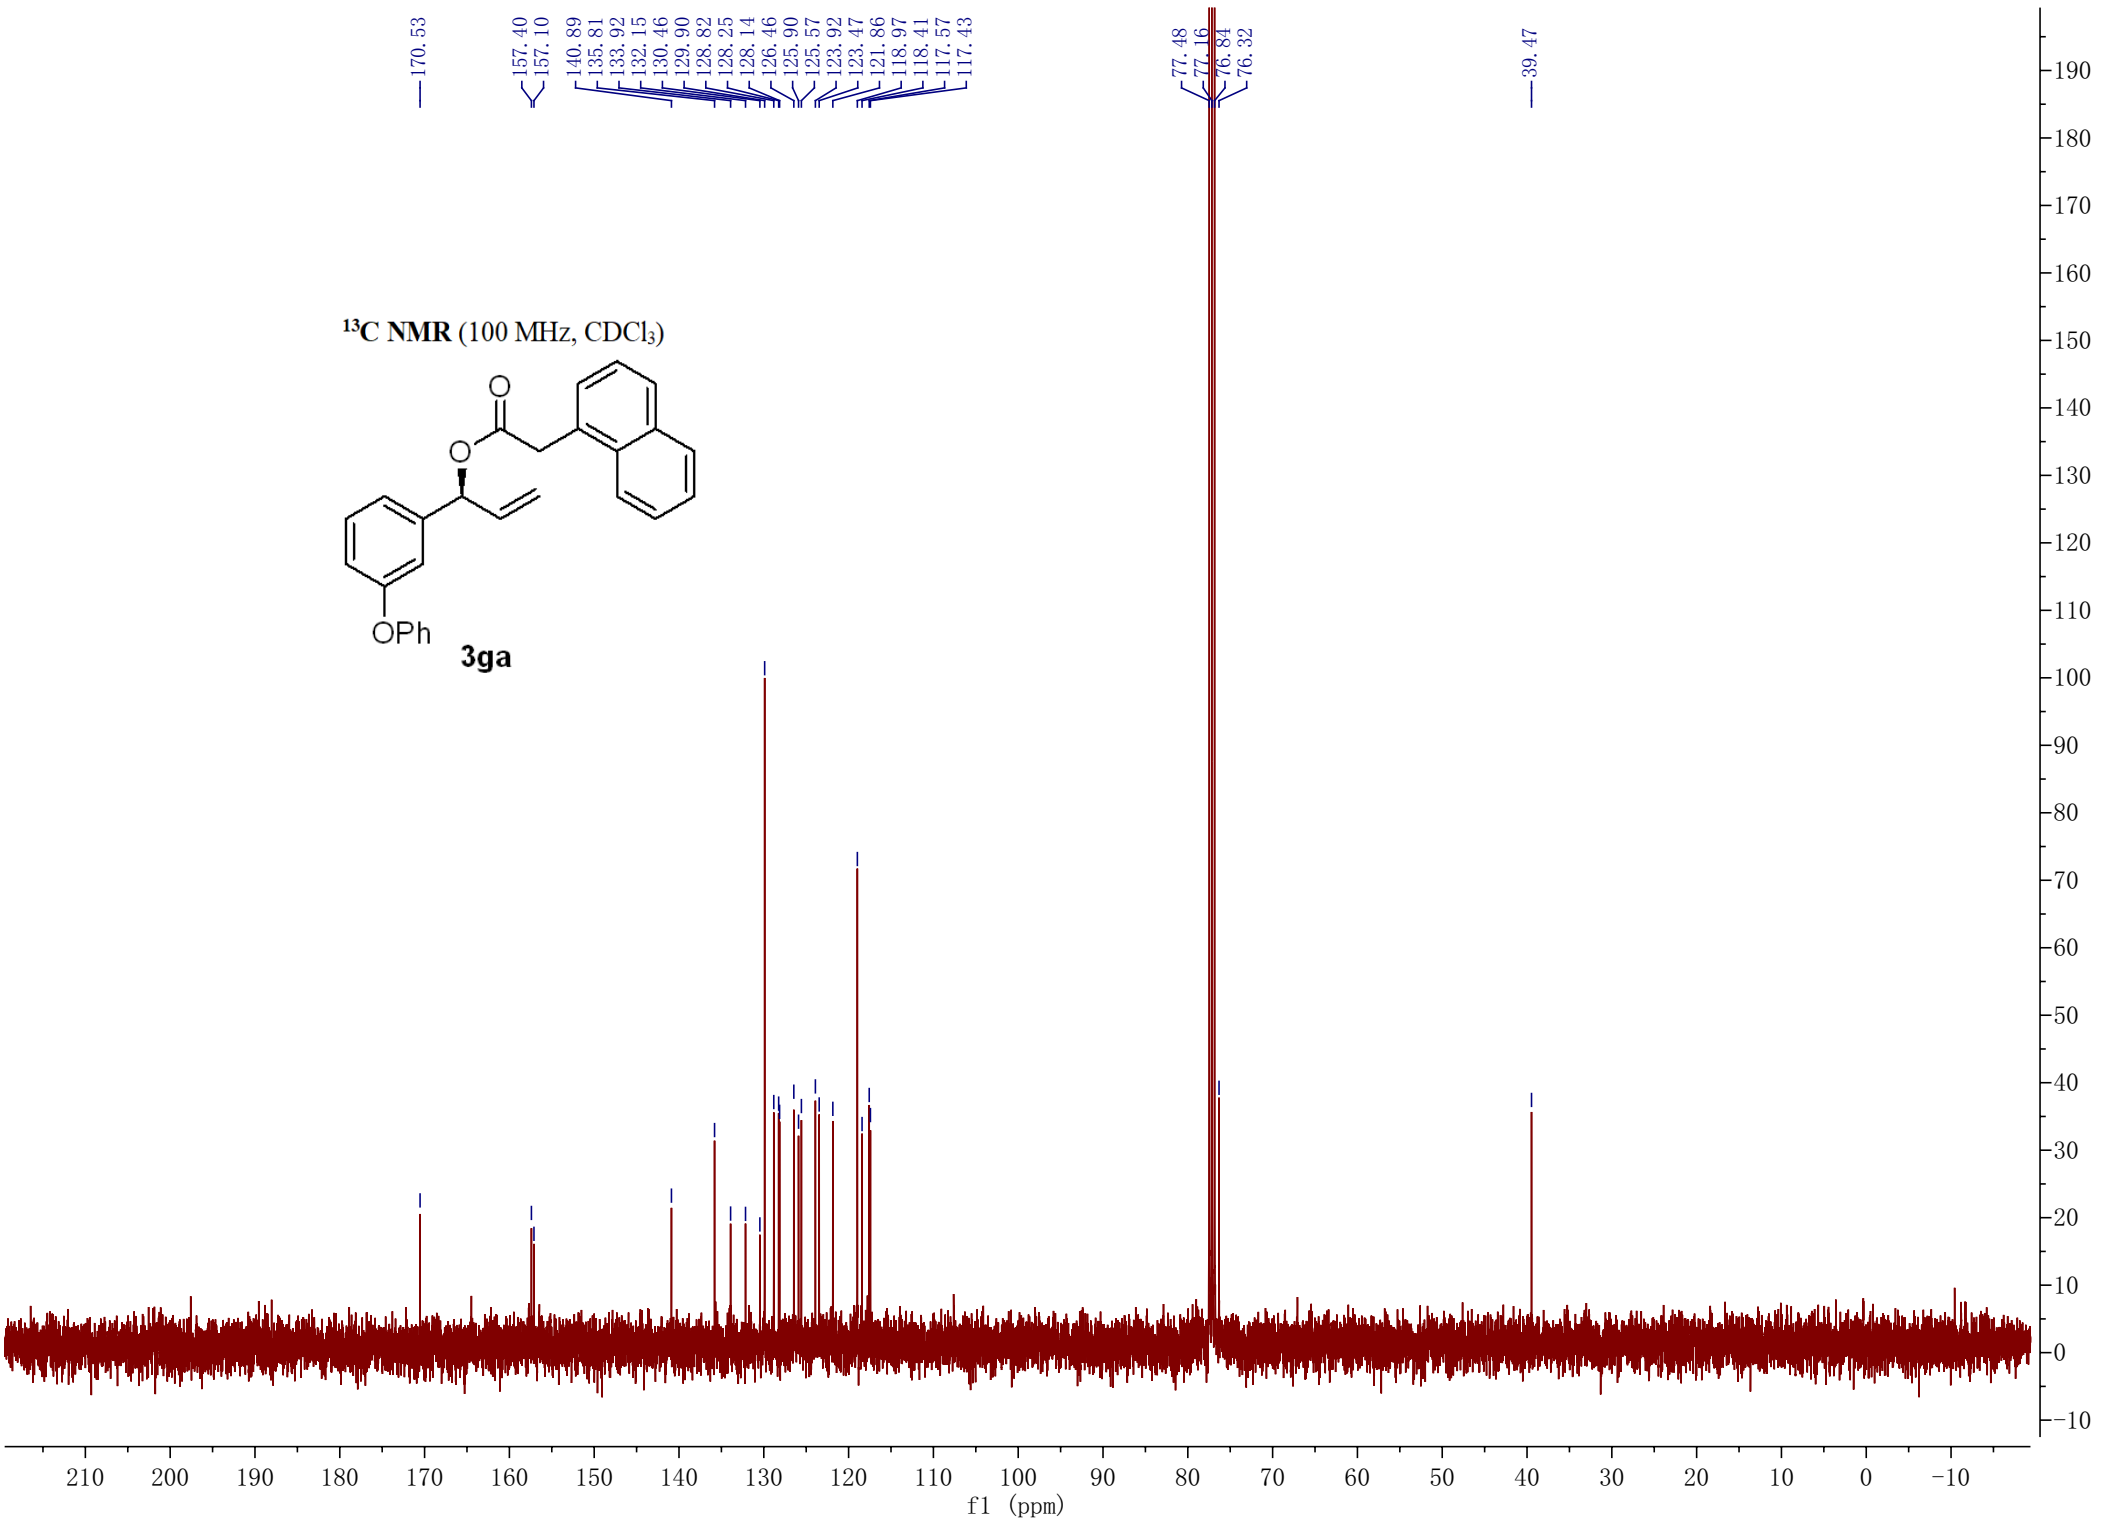

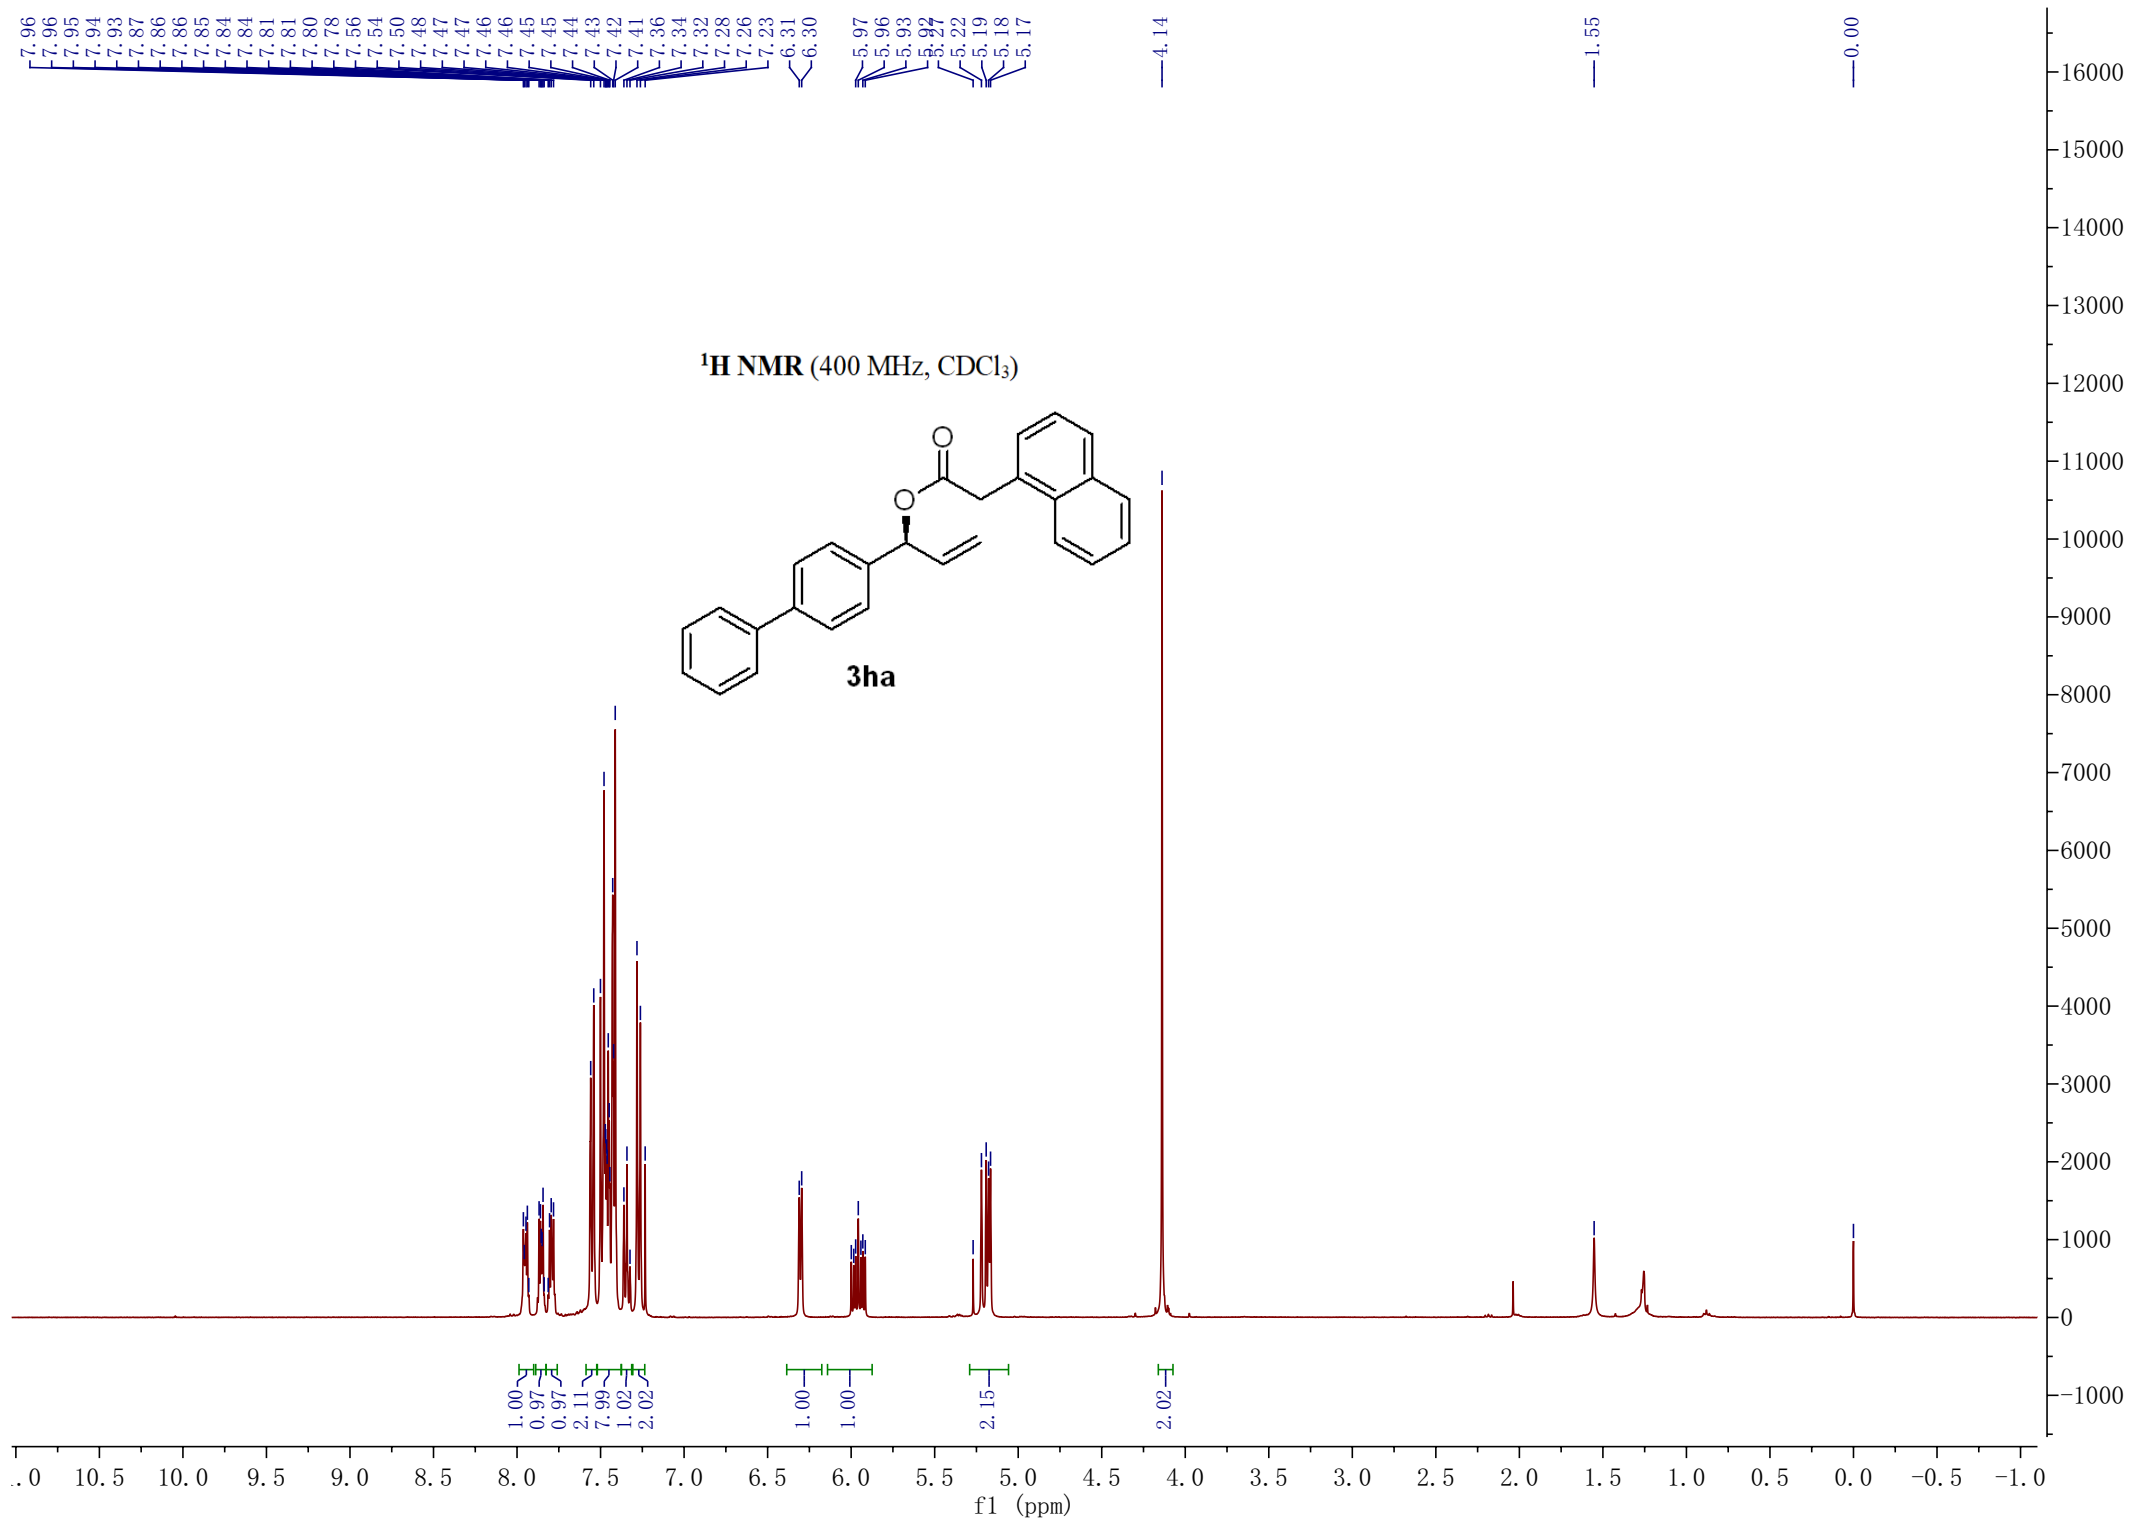

170.64  
141.17  
140.79  
137.80  
136.01  
133.93  
132.20  
130.58  
128.90  
128.81  
128.22  
128.16  
127.61  
127.53  
127.35  
127.24  
126.44  
125.90  
125.58  
123.98  
117.18

77.48  
77.16  
76.84  
76.53

39.57

<sup>13</sup>C NMR (100 MHz, CDCl<sub>3</sub>)

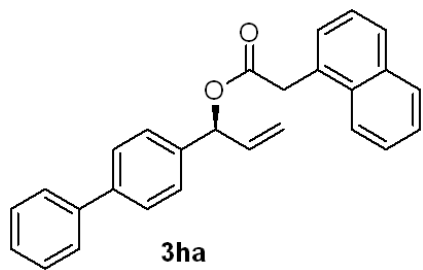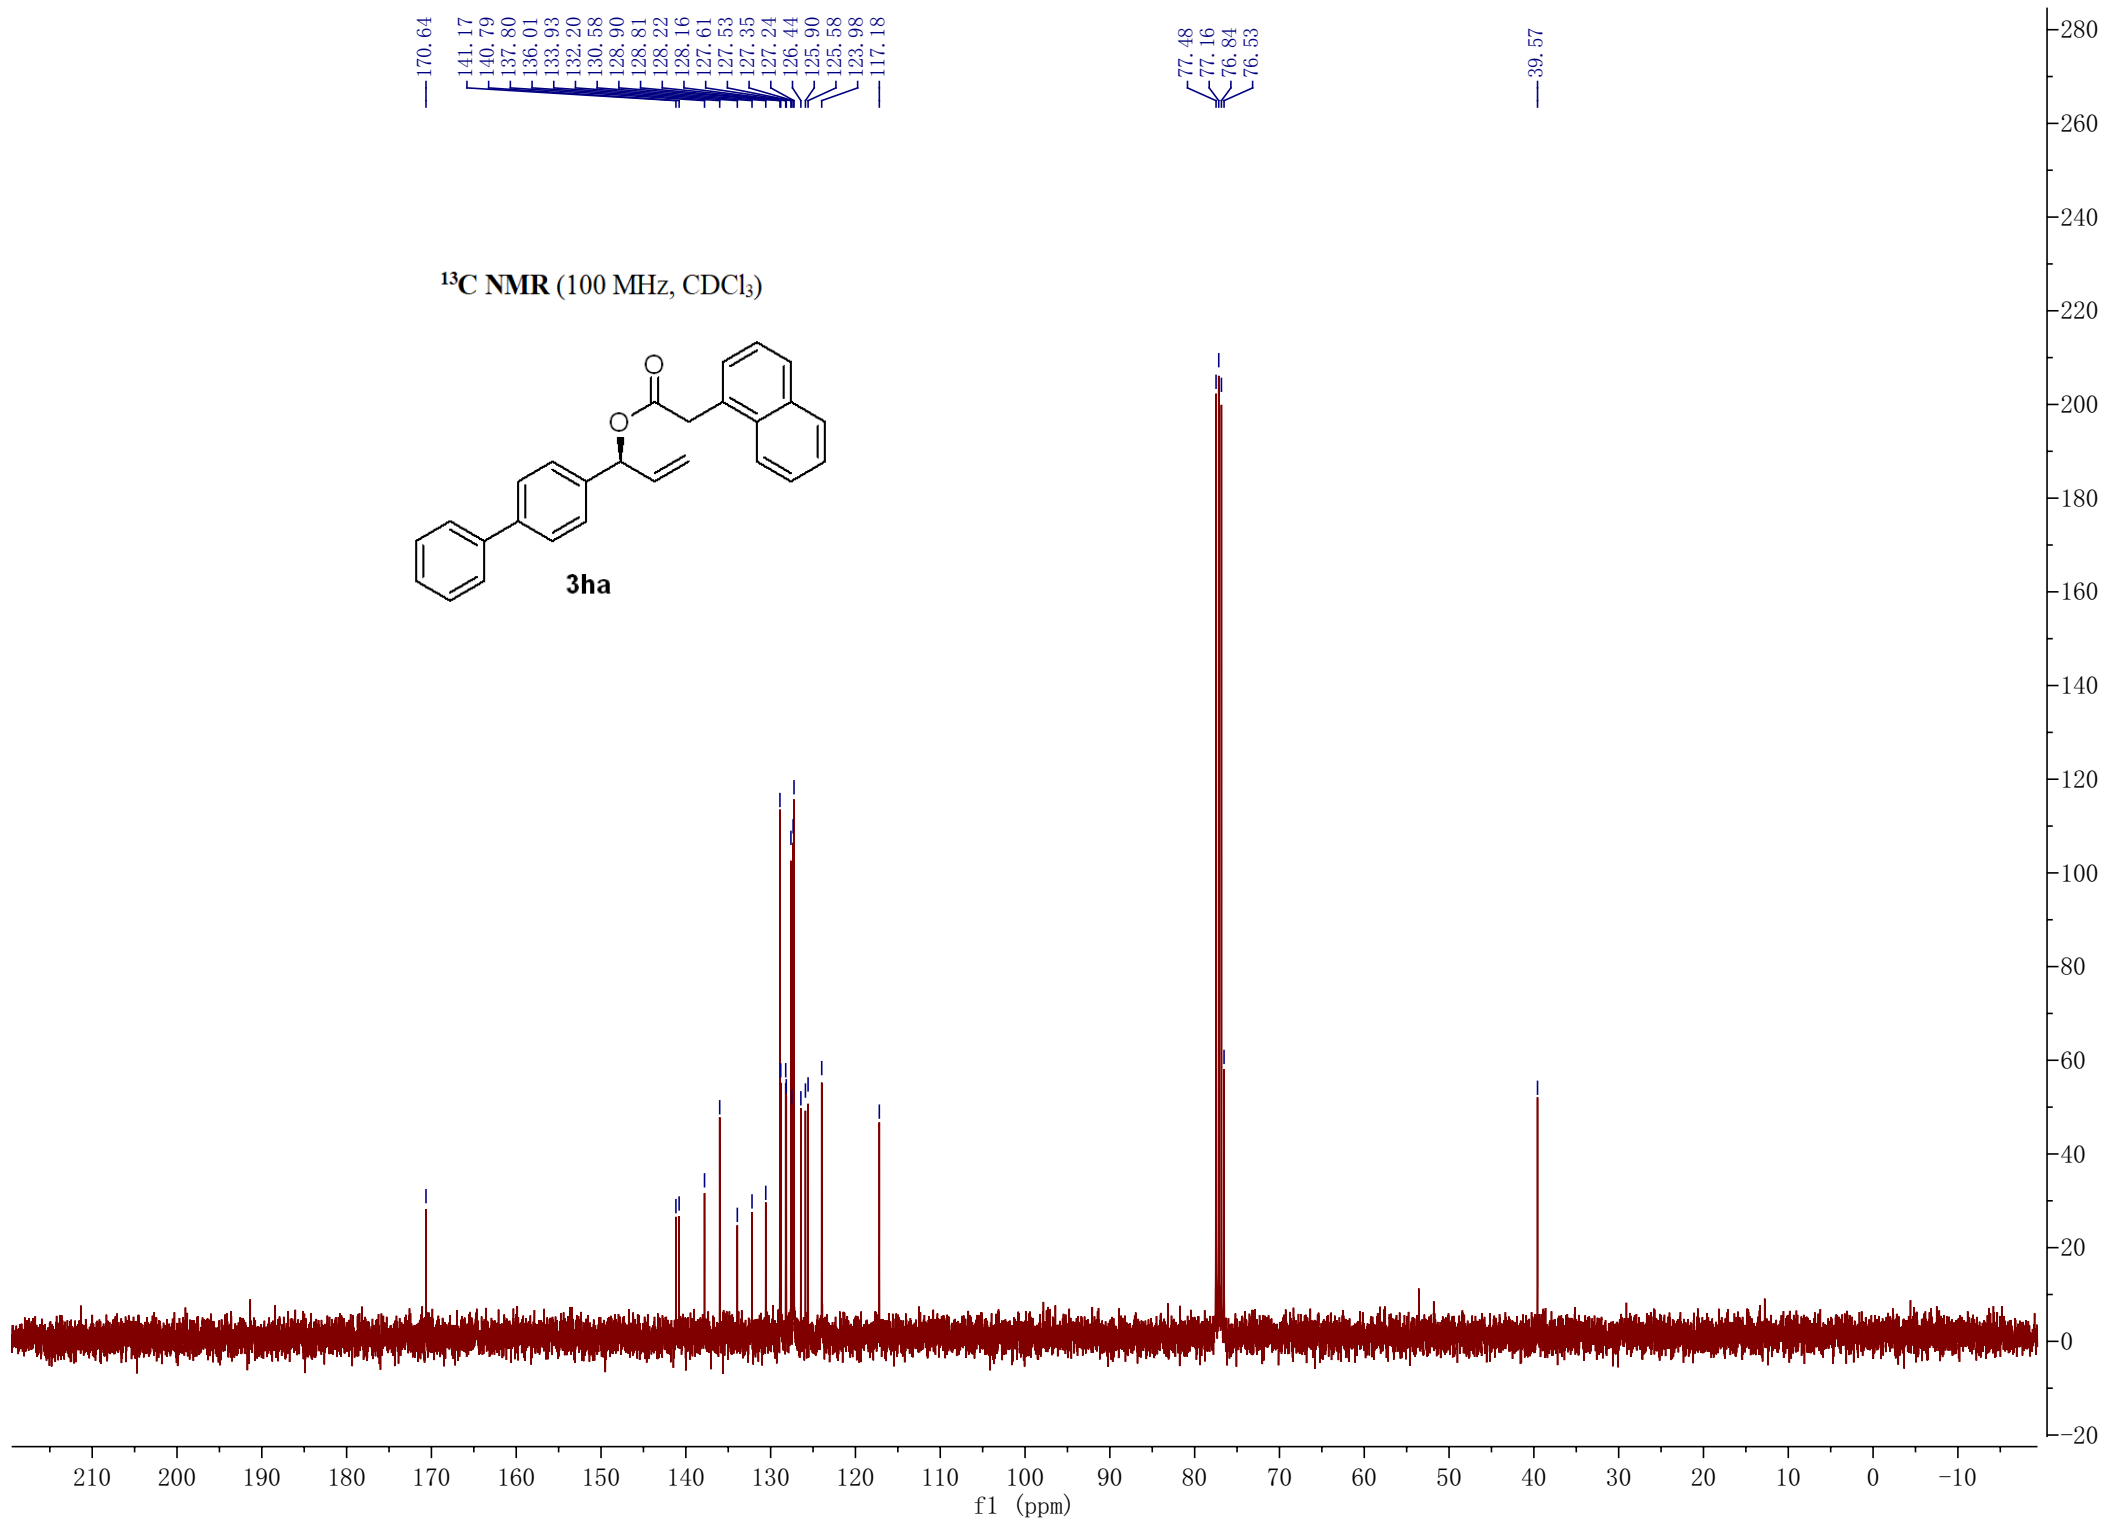

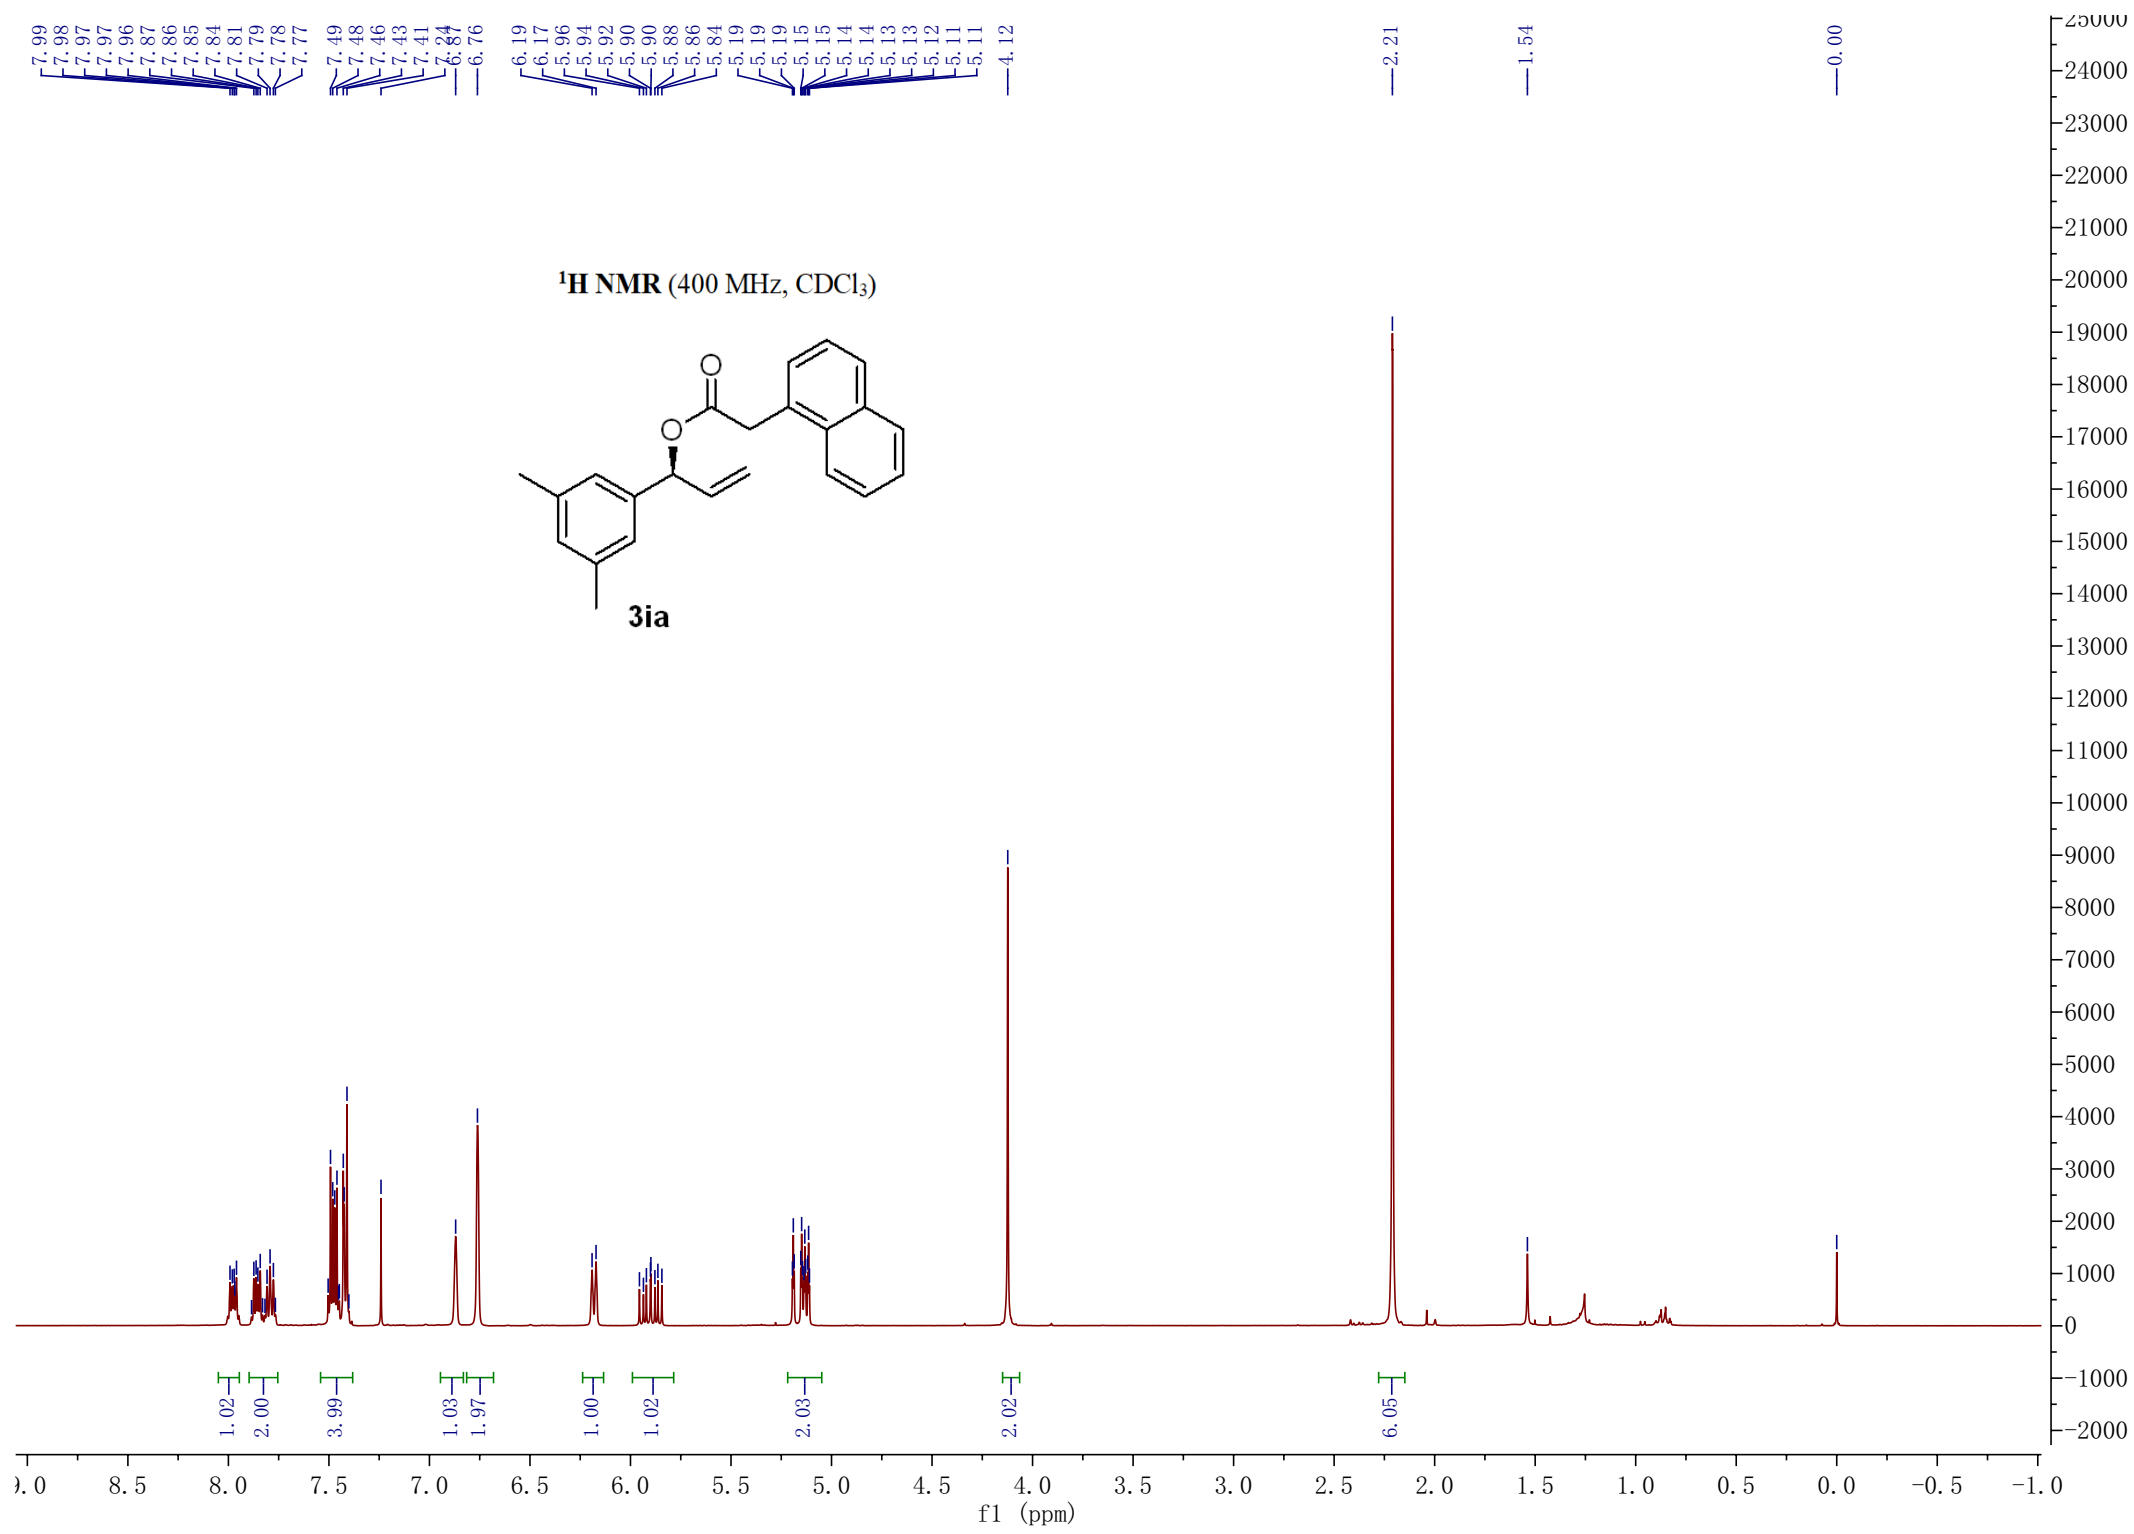



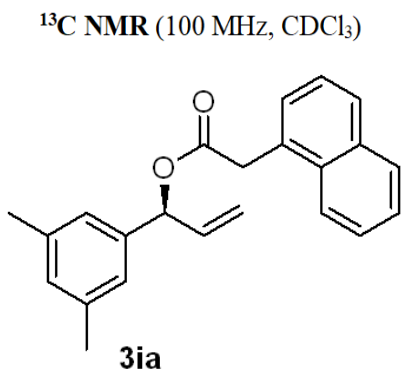

170.56  
138.76  
138.14  
136.33  
133.96  
132.25  
130.70  
129.80  
128.80  
128.19  
126.42  
125.88  
125.59  
124.69  
124.08  
116.79

77.58  
77.16  
76.80  
76.74

39.61

21.35

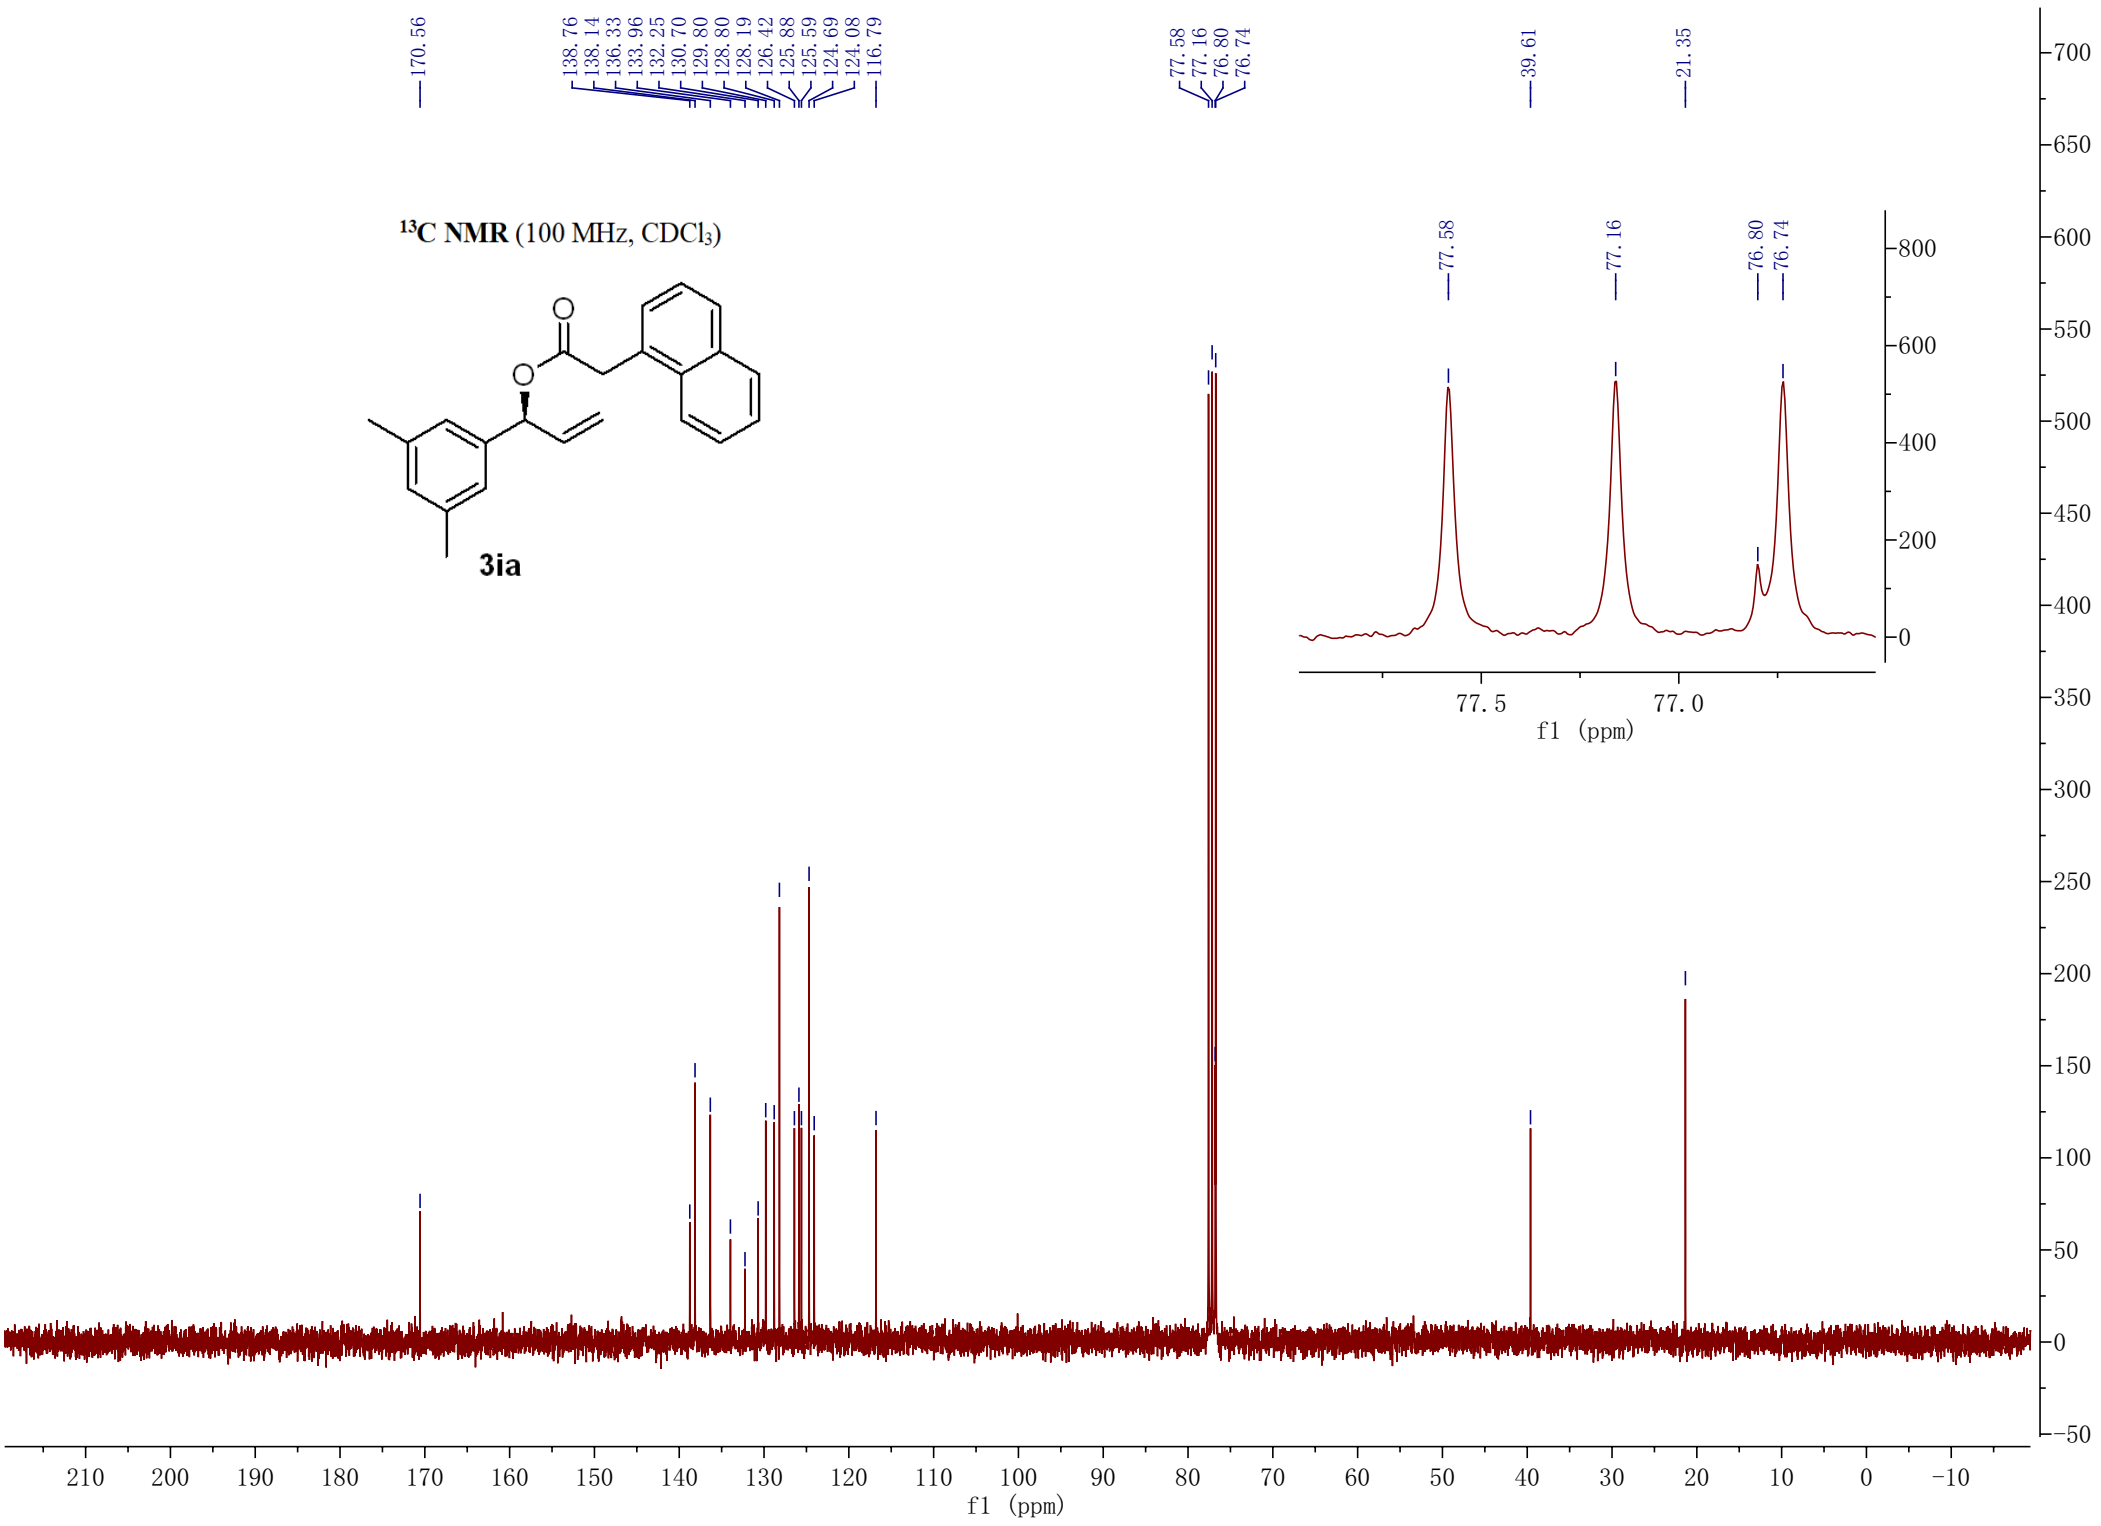

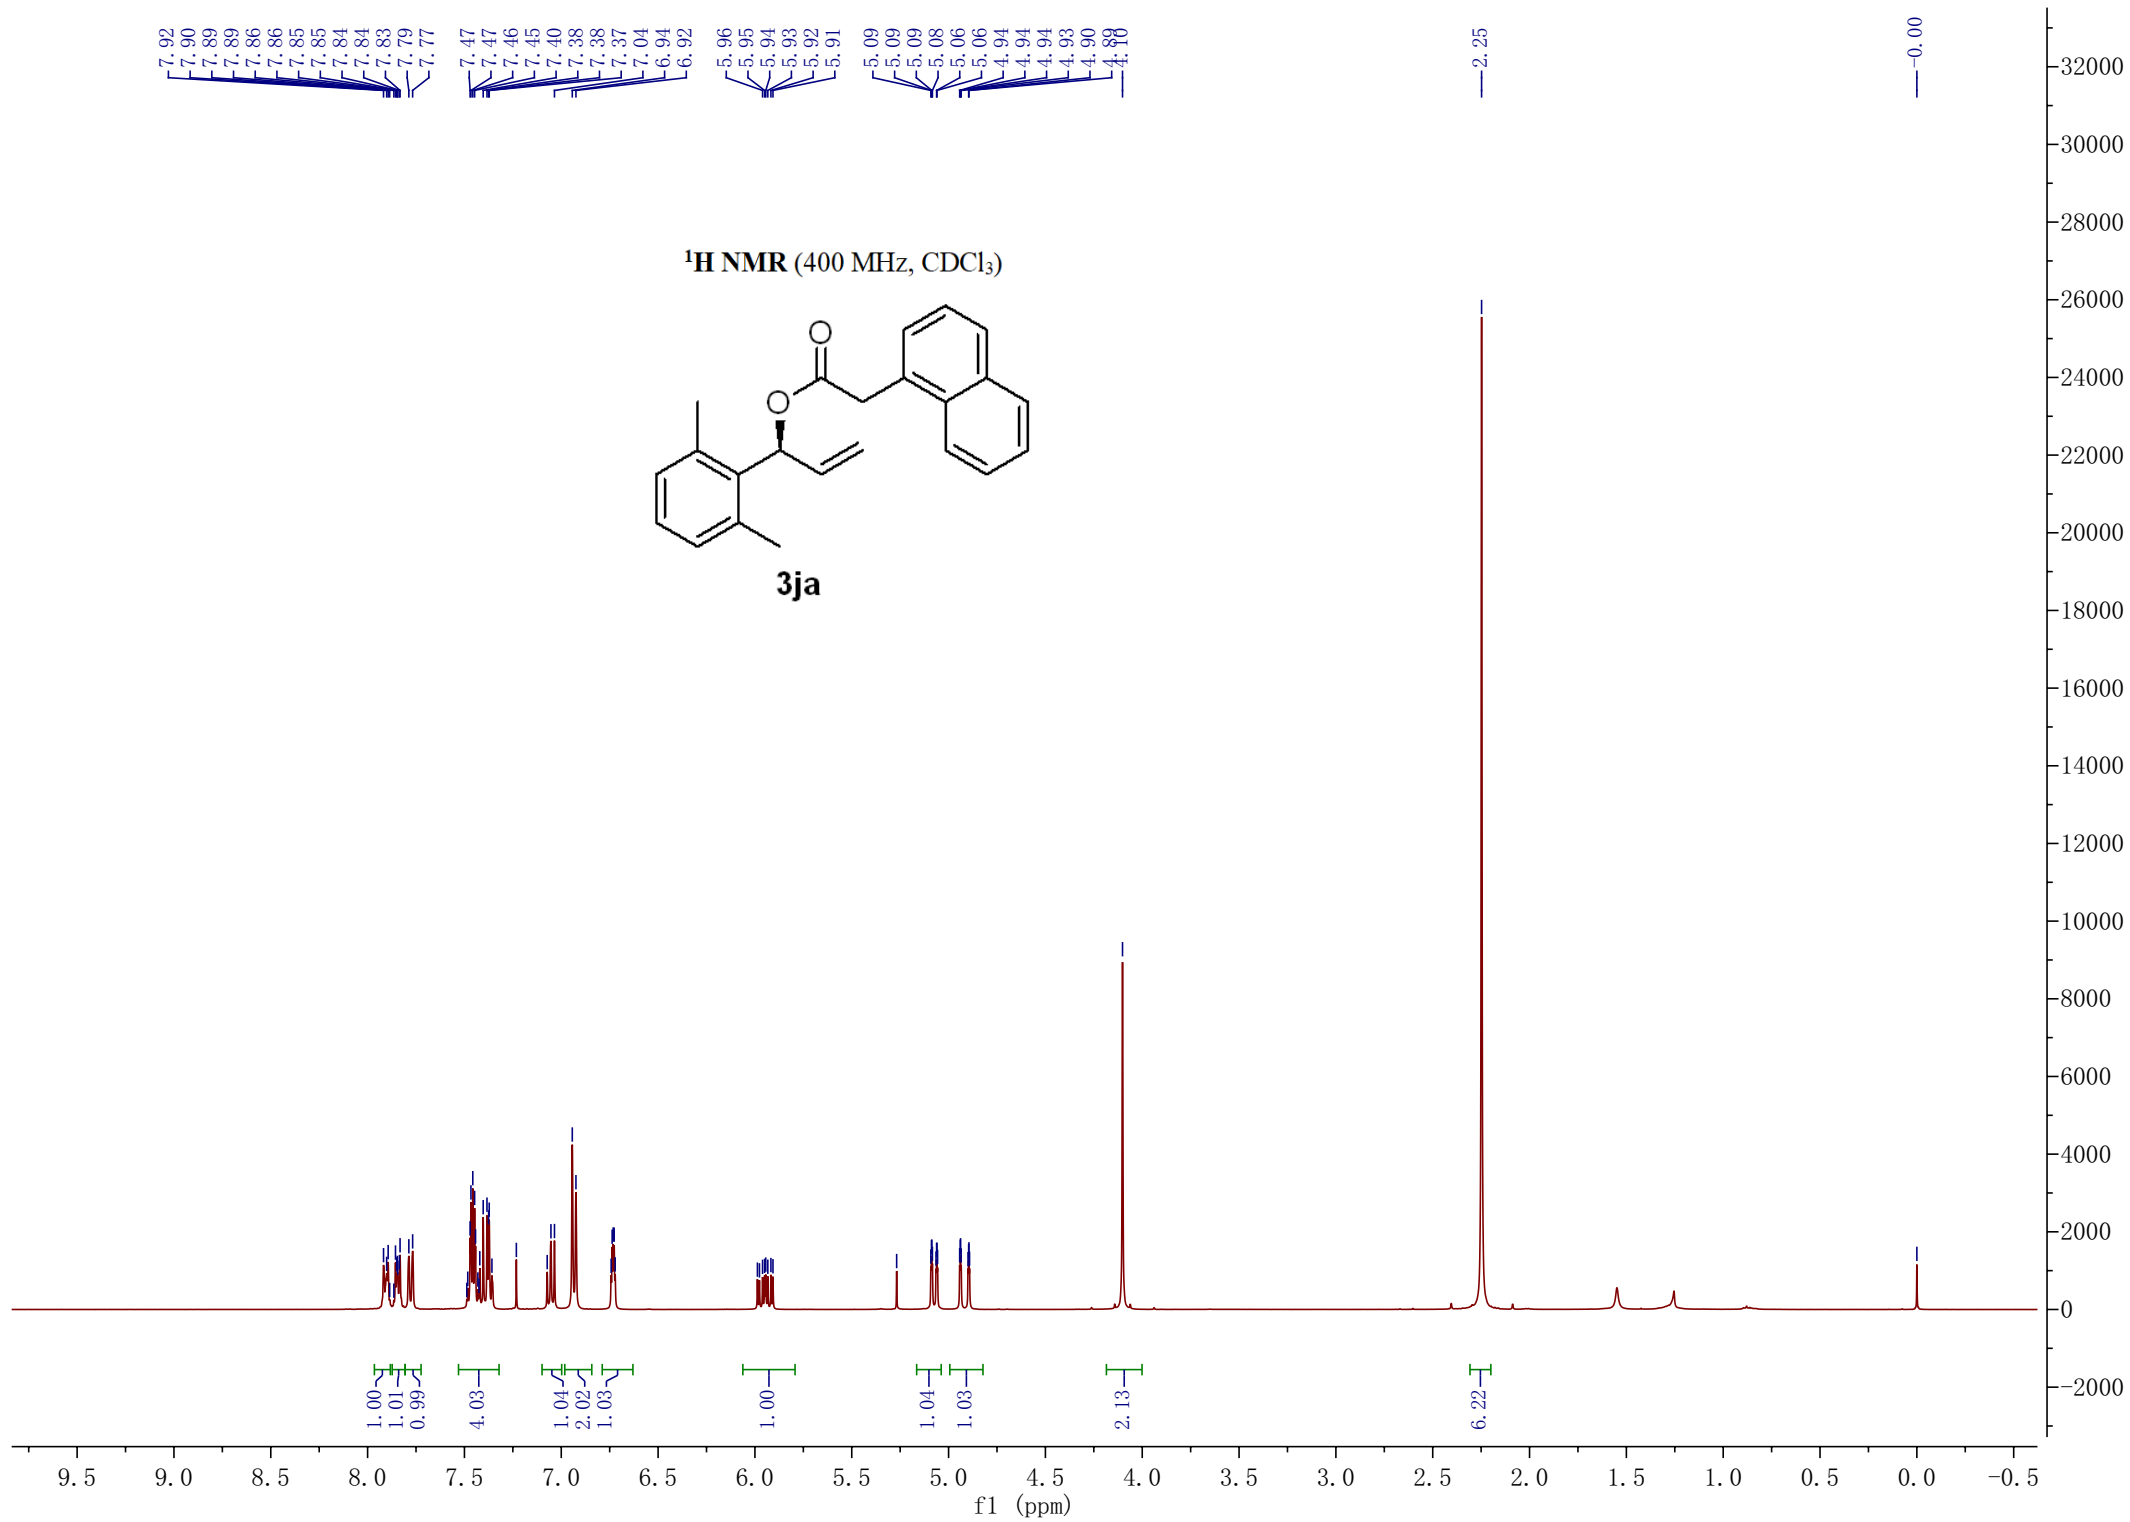

170.81  
137.35  
134.99  
134.40  
133.91  
132.22  
130.59  
129.05  
128.80  
128.18  
128.16  
128.09  
126.44  
125.89  
125.55  
123.84  
116.27

77.48  
77.16  
76.84  
73.56

39.49

20.51

<sup>13</sup>C NMR (100 MHz, CDCl<sub>3</sub>)

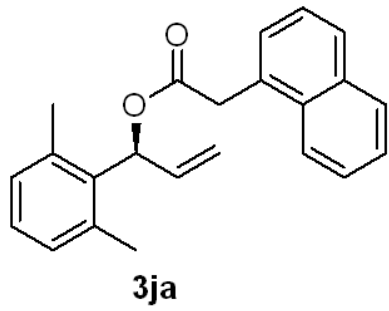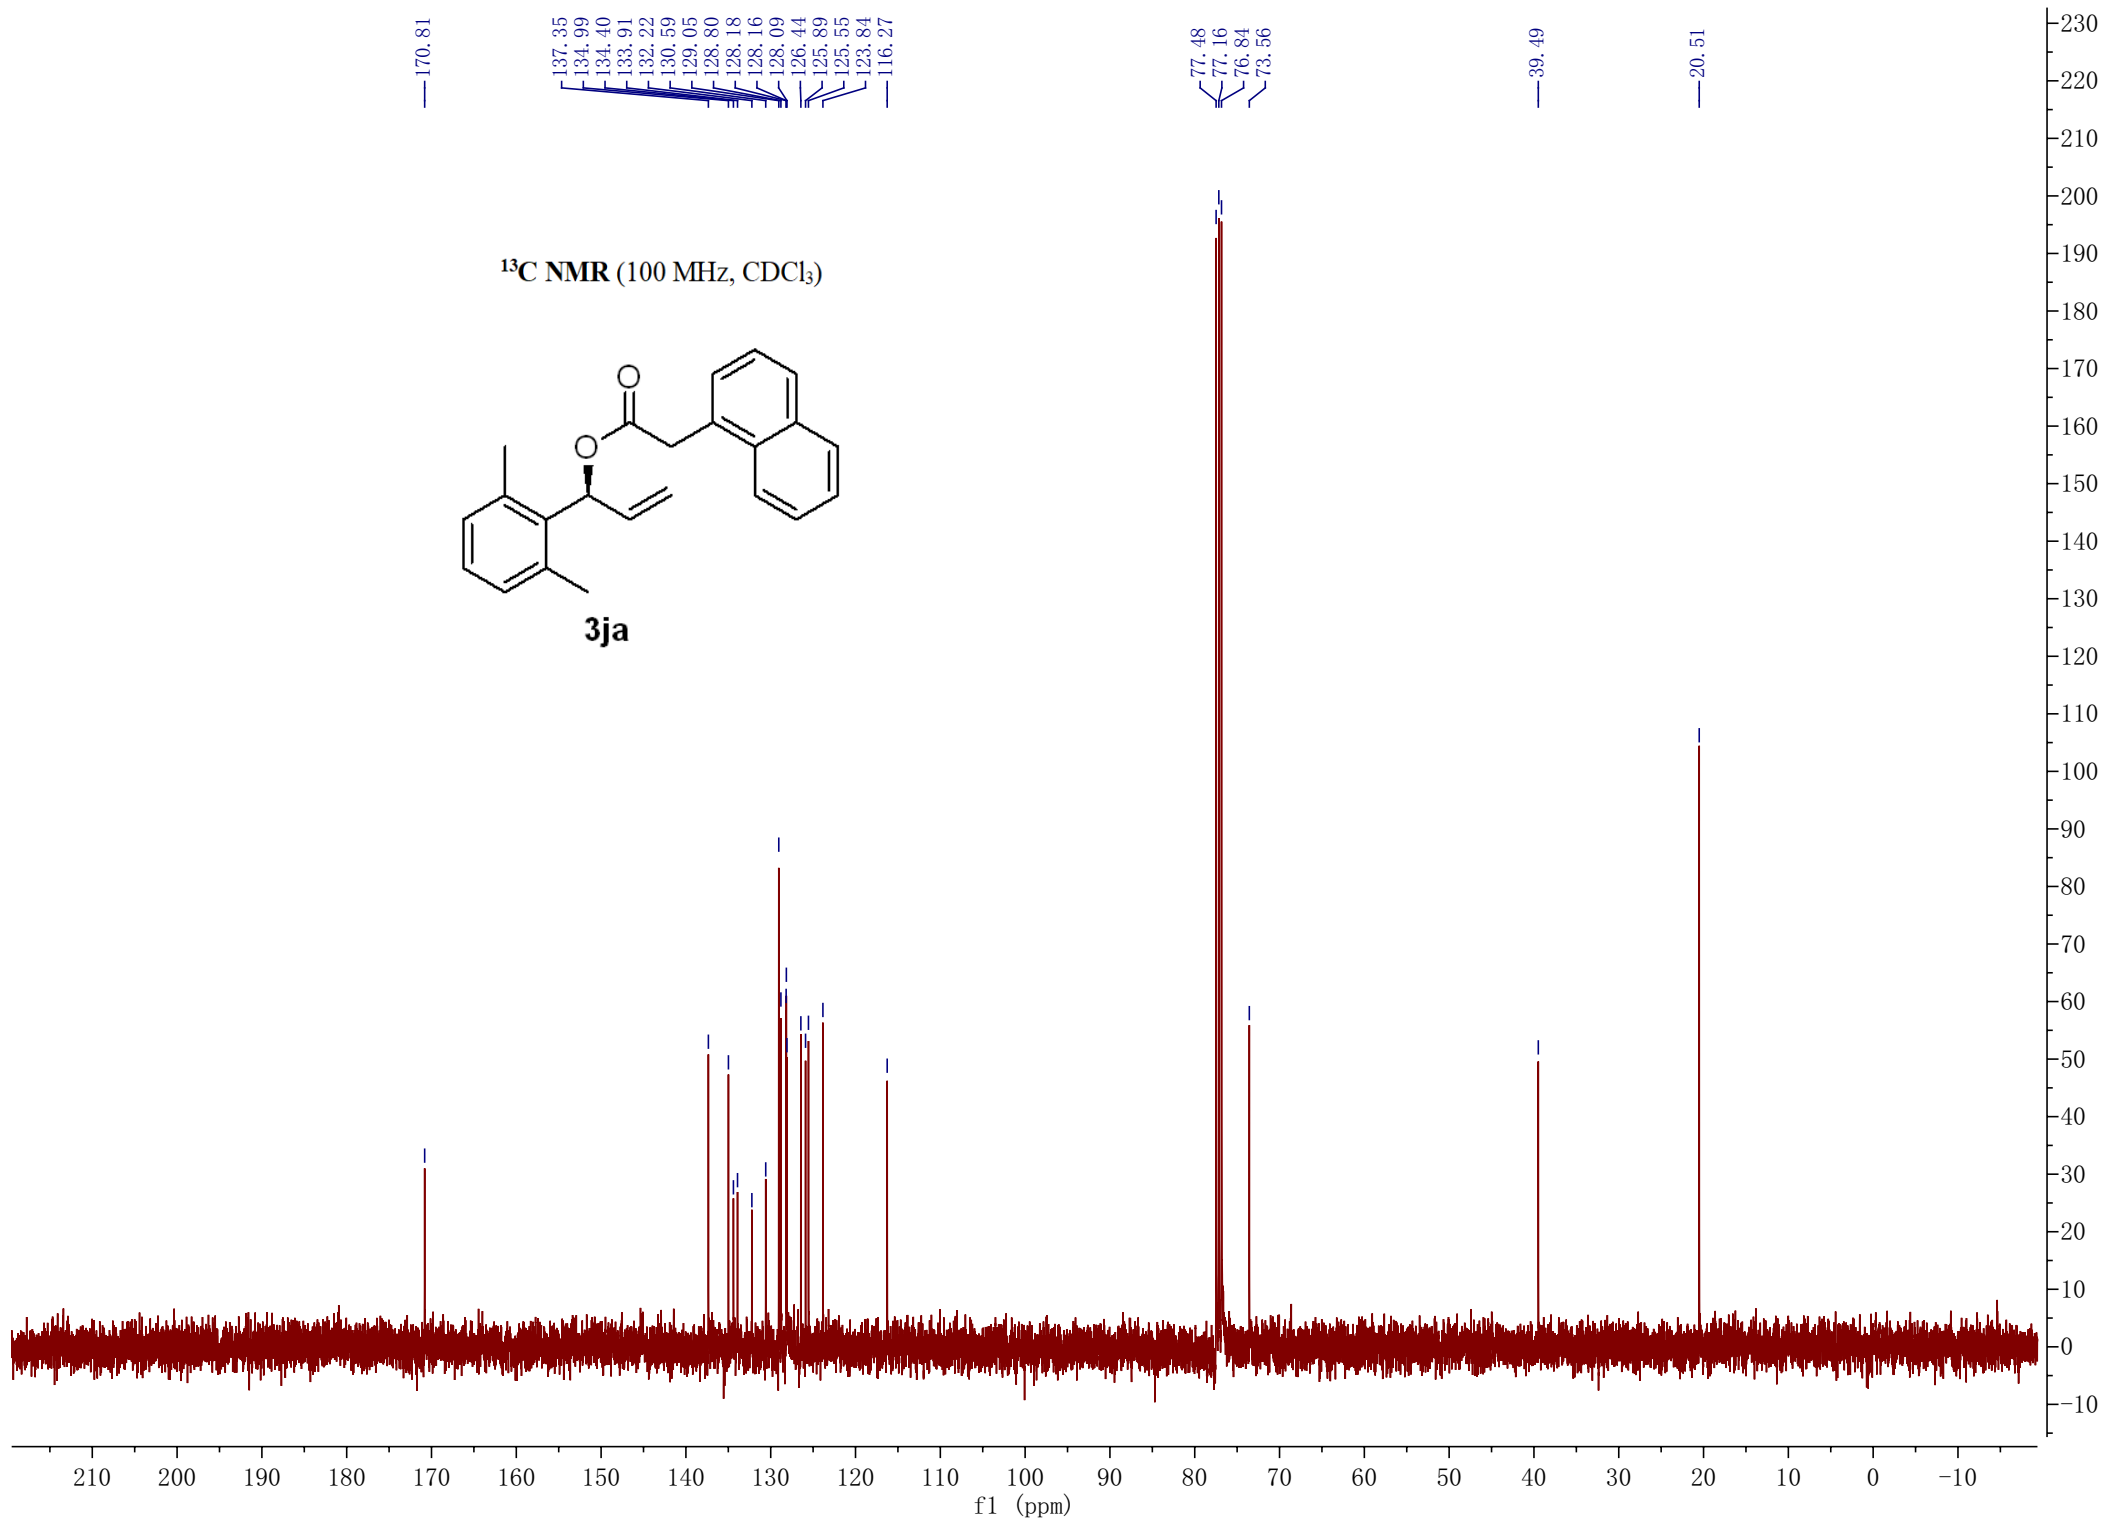

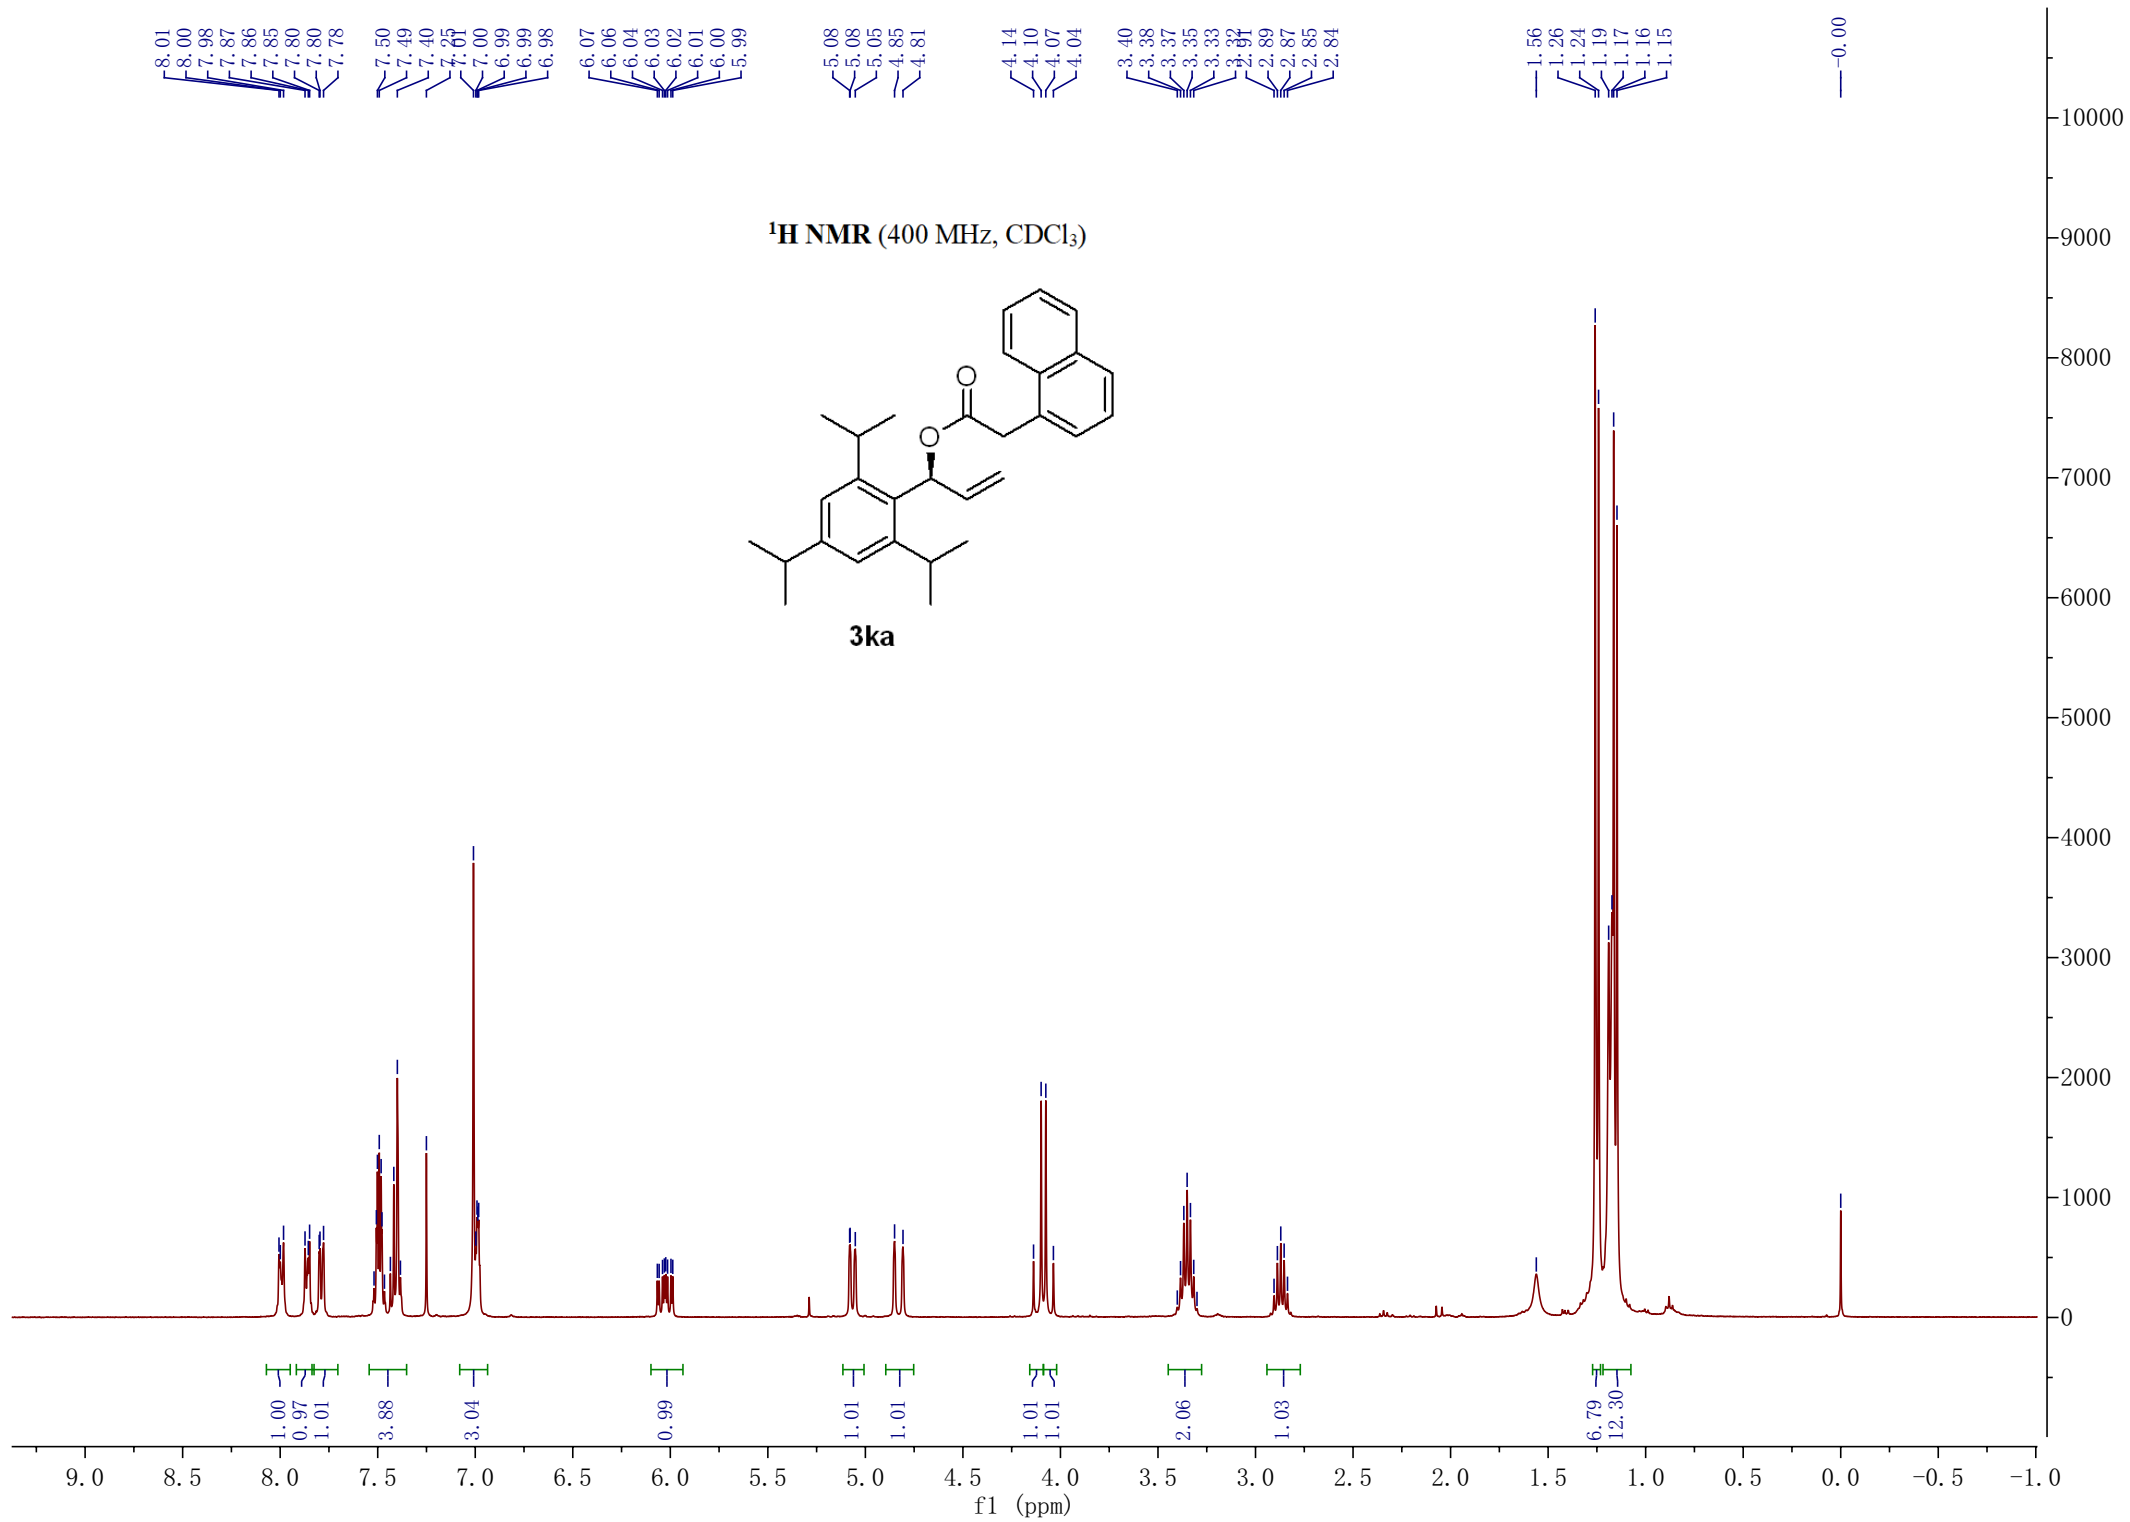

171.10

148.91

137.83

133.99

130.65

129.58

128.85

128.29

128.22

126.43

125.89

125.61

118.96

77.48

77.16

76.84

72.12

39.71

34.27

29.80

25.19

24.07

23.86

<sup>13</sup>C NMR (100 MHz, CDCl<sub>3</sub>)

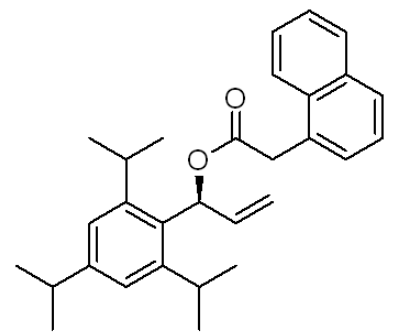

3ka

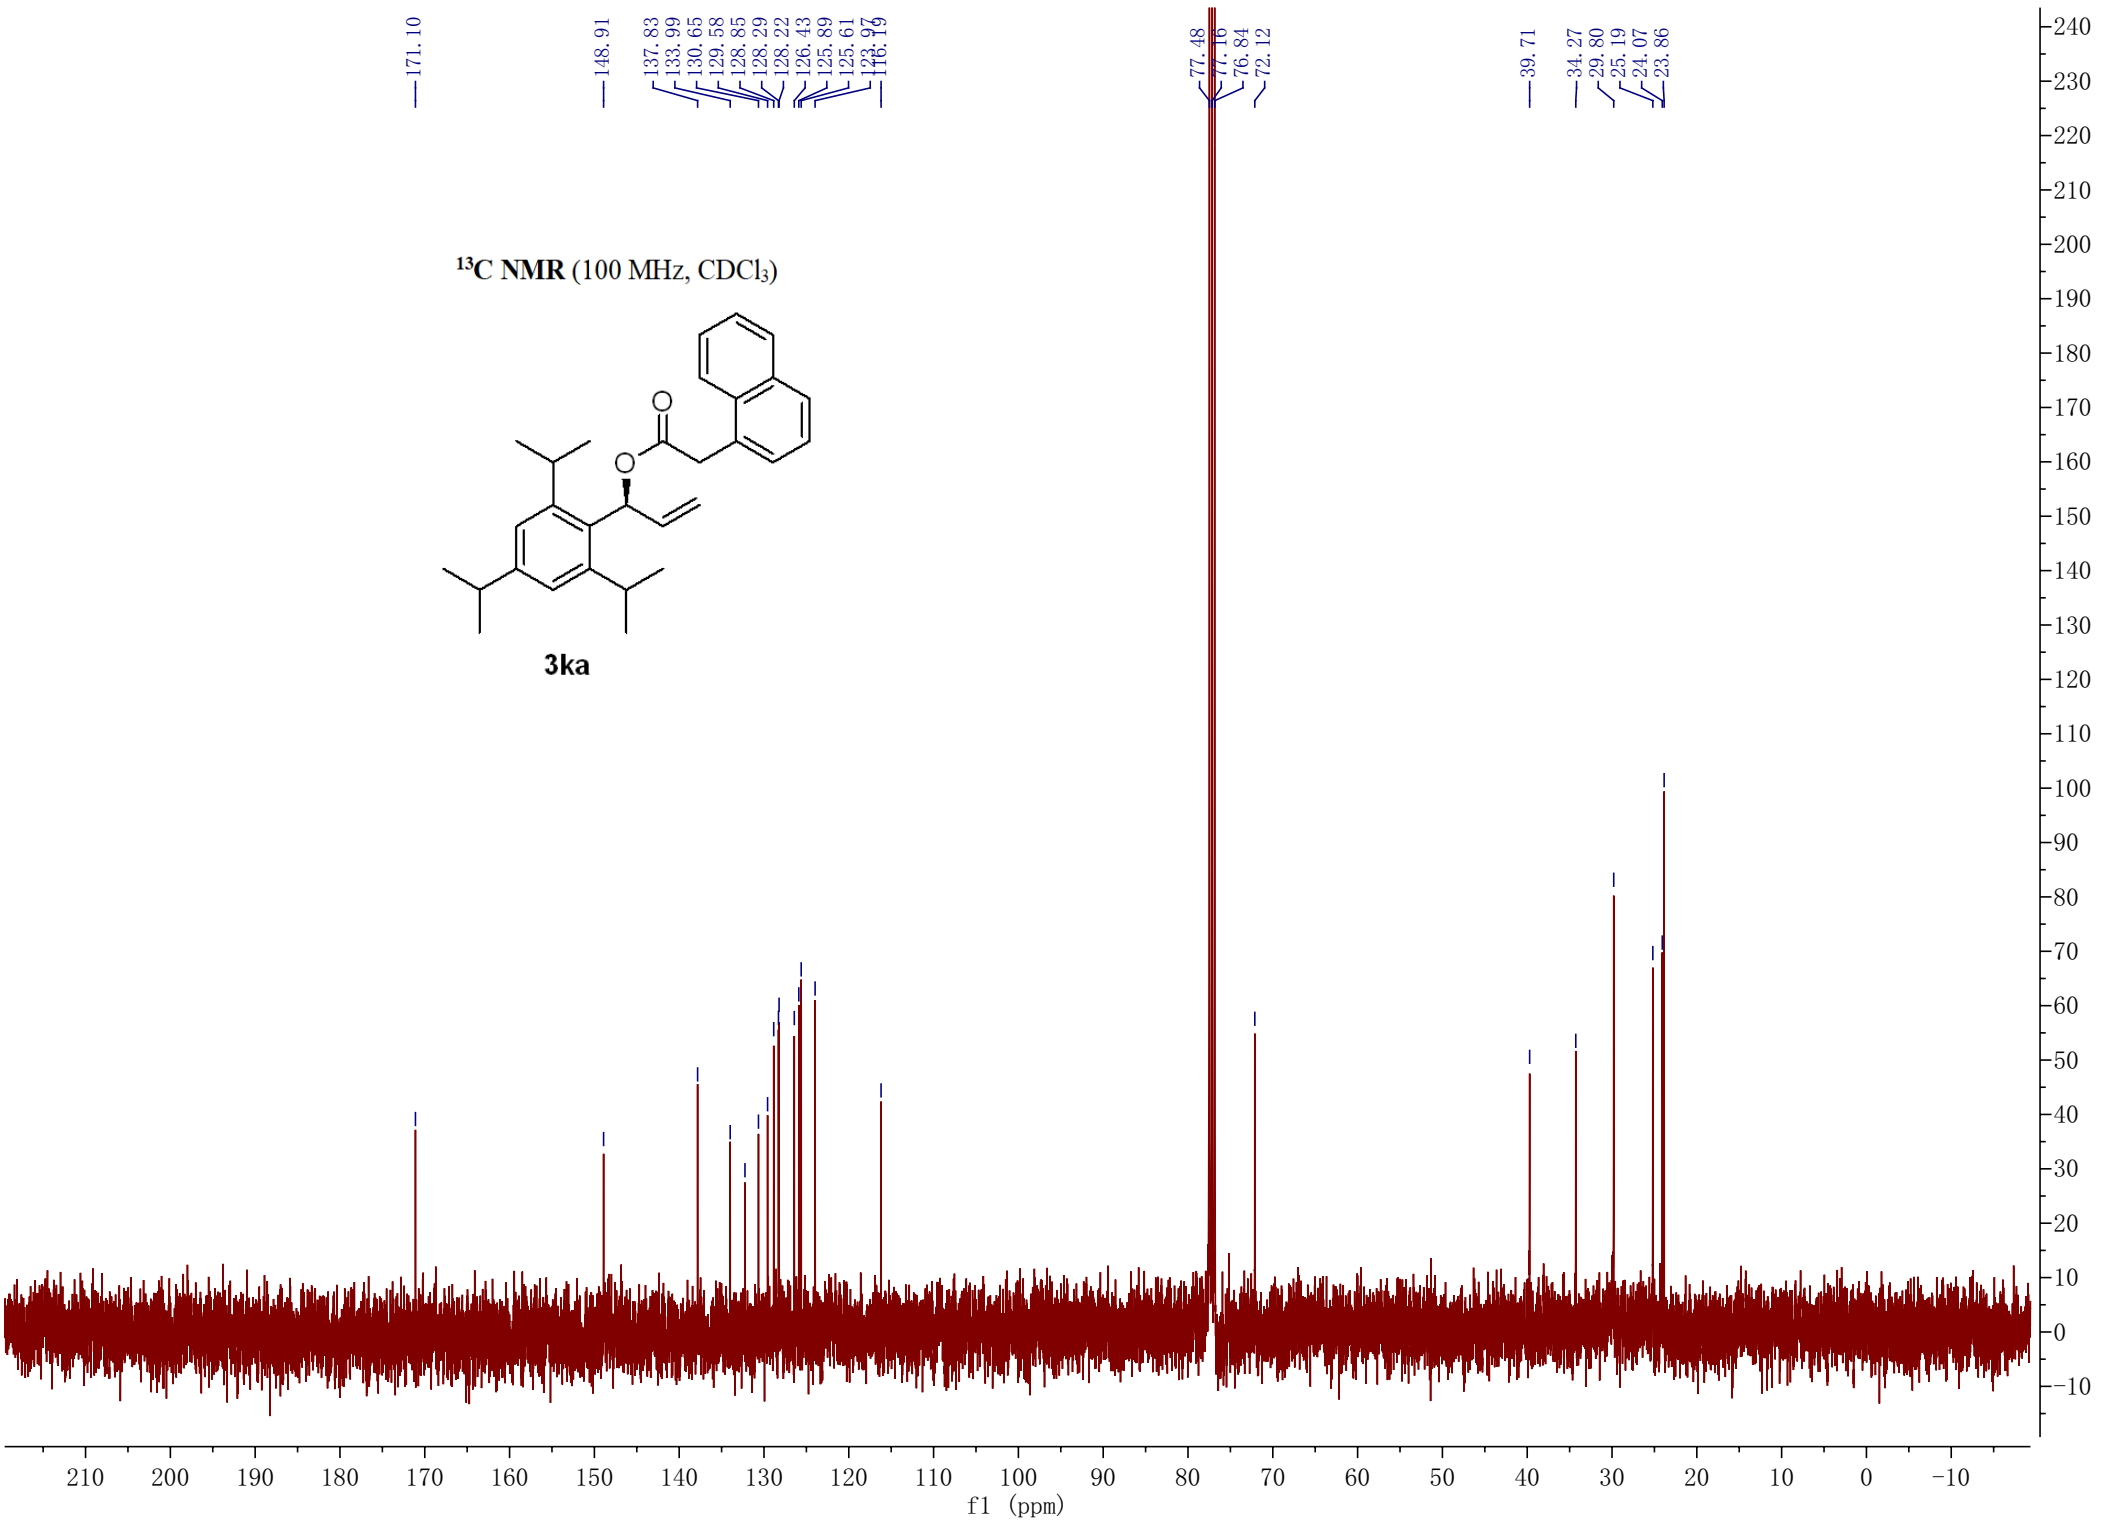

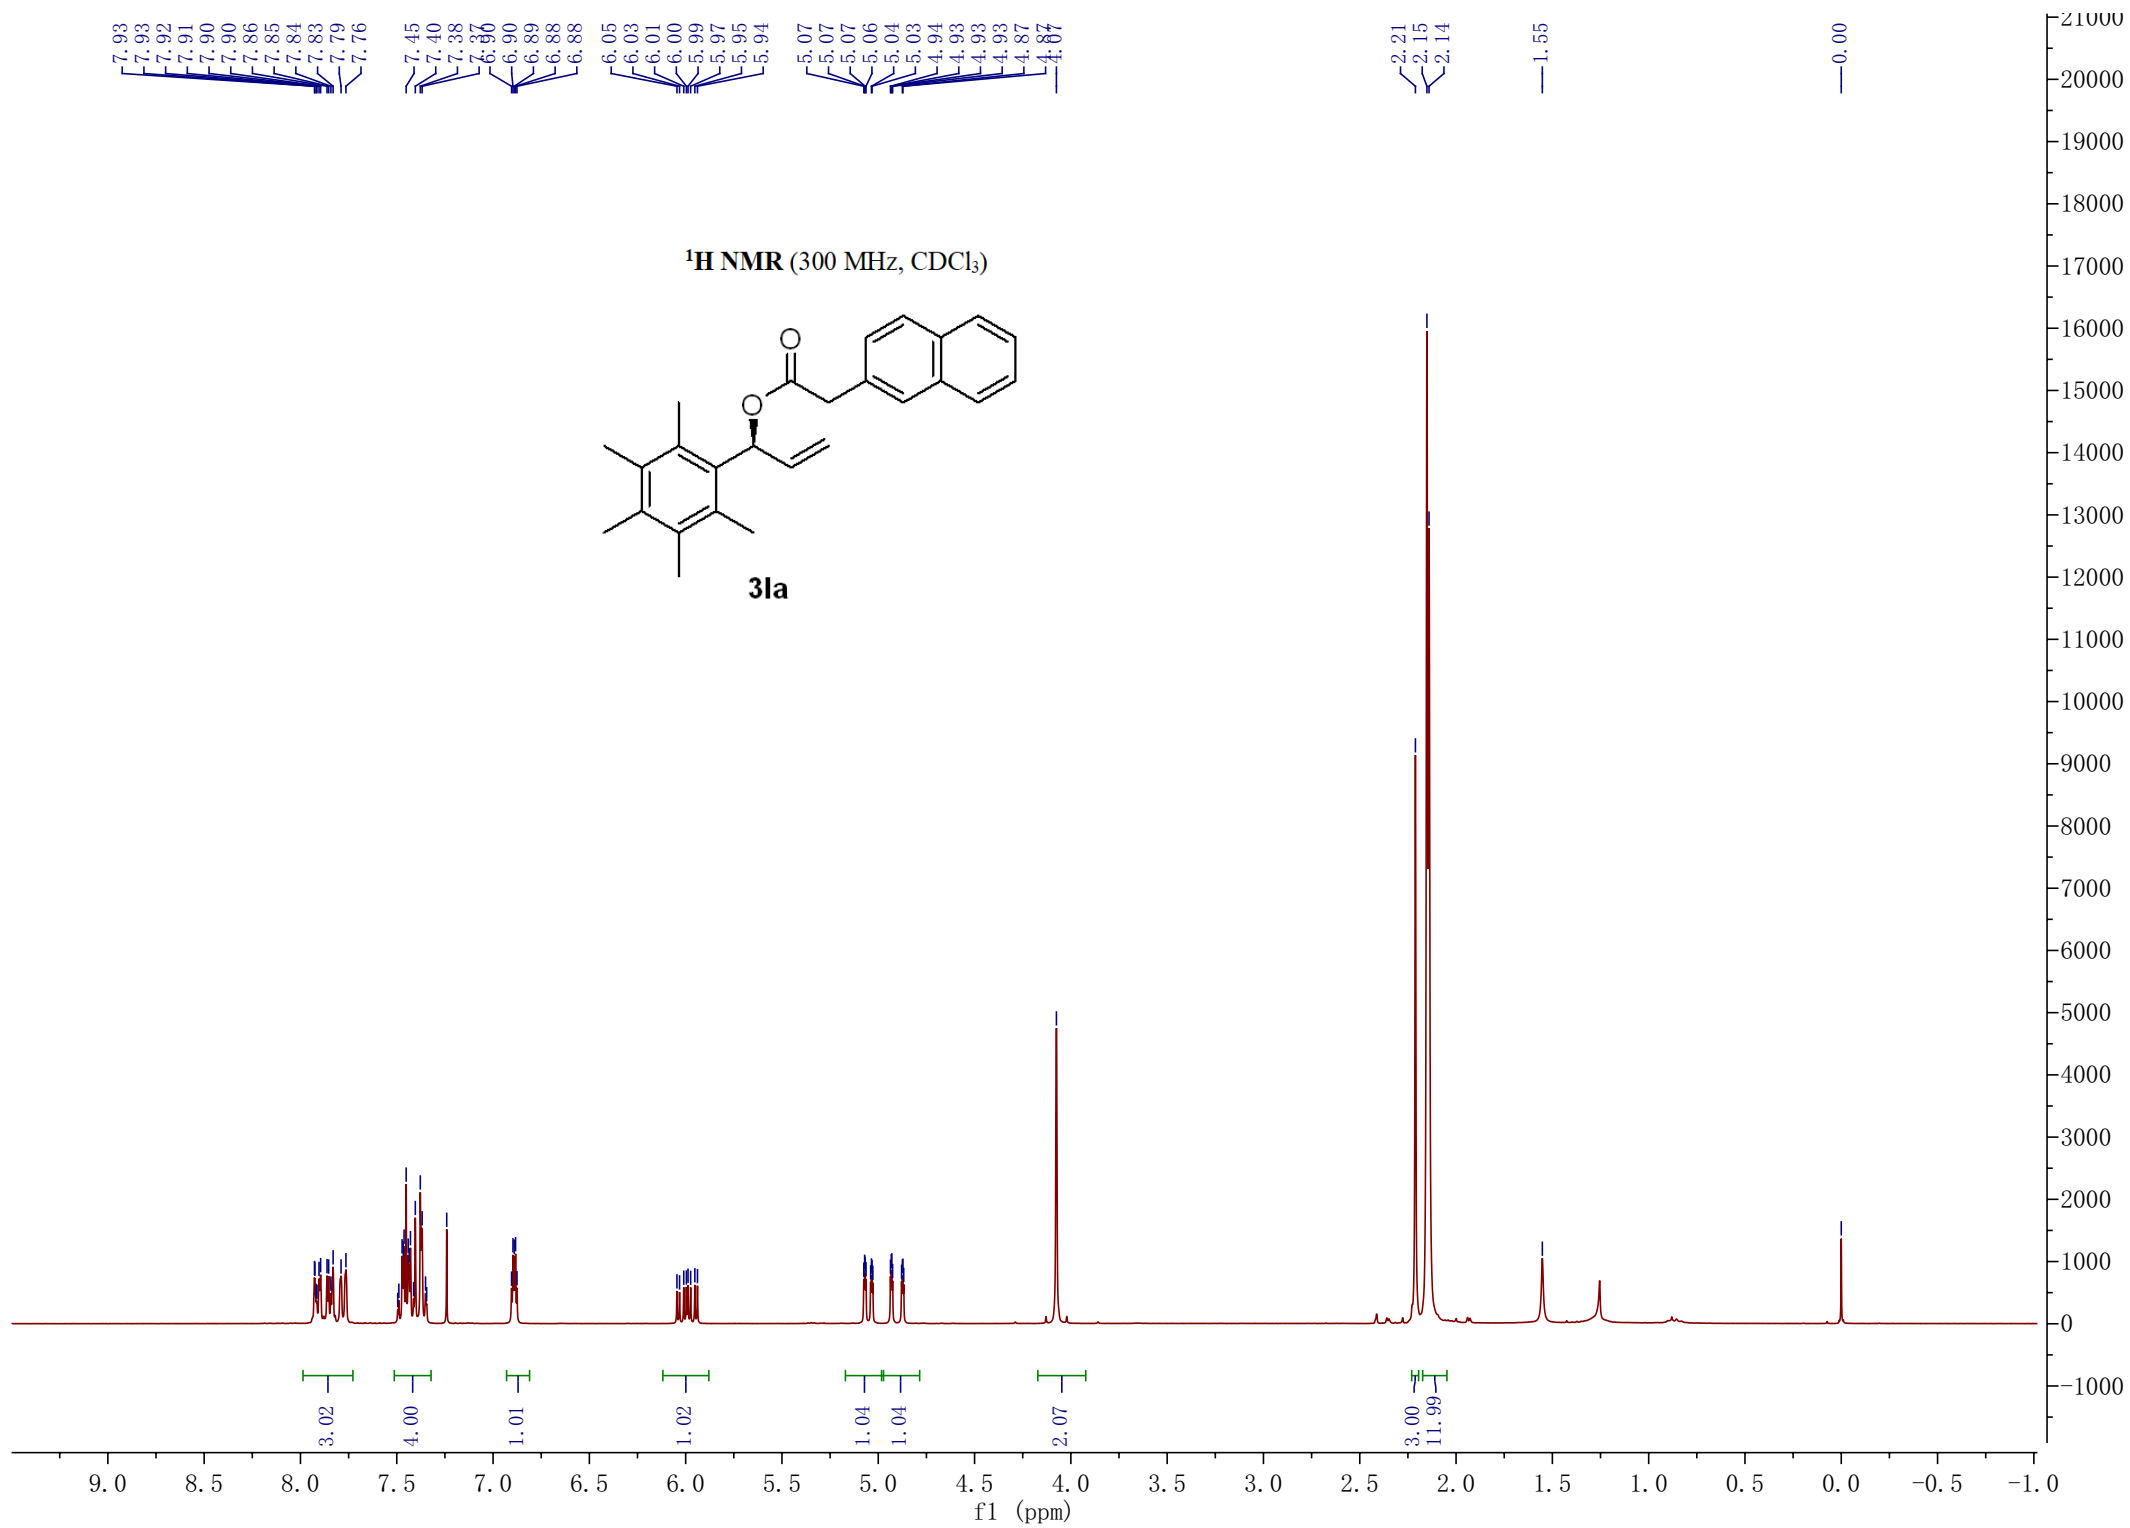

170.94  
136.31  
135.20  
133.92  
133.18  
132.97  
132.28  
132.23  
130.76  
128.77  
128.18  
128.10  
126.35  
125.84  
125.55  
123.95  
116.13

<sup>13</sup>C NMR (75 MHz, CDCl<sub>3</sub>)

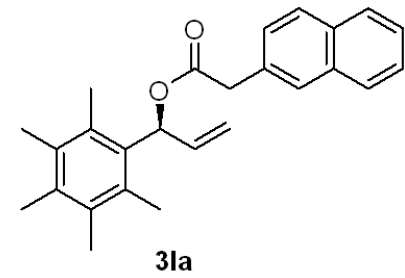

77.58  
77.16  
76.74  
74.38  
39.64  
17.30  
17.23  
16.83

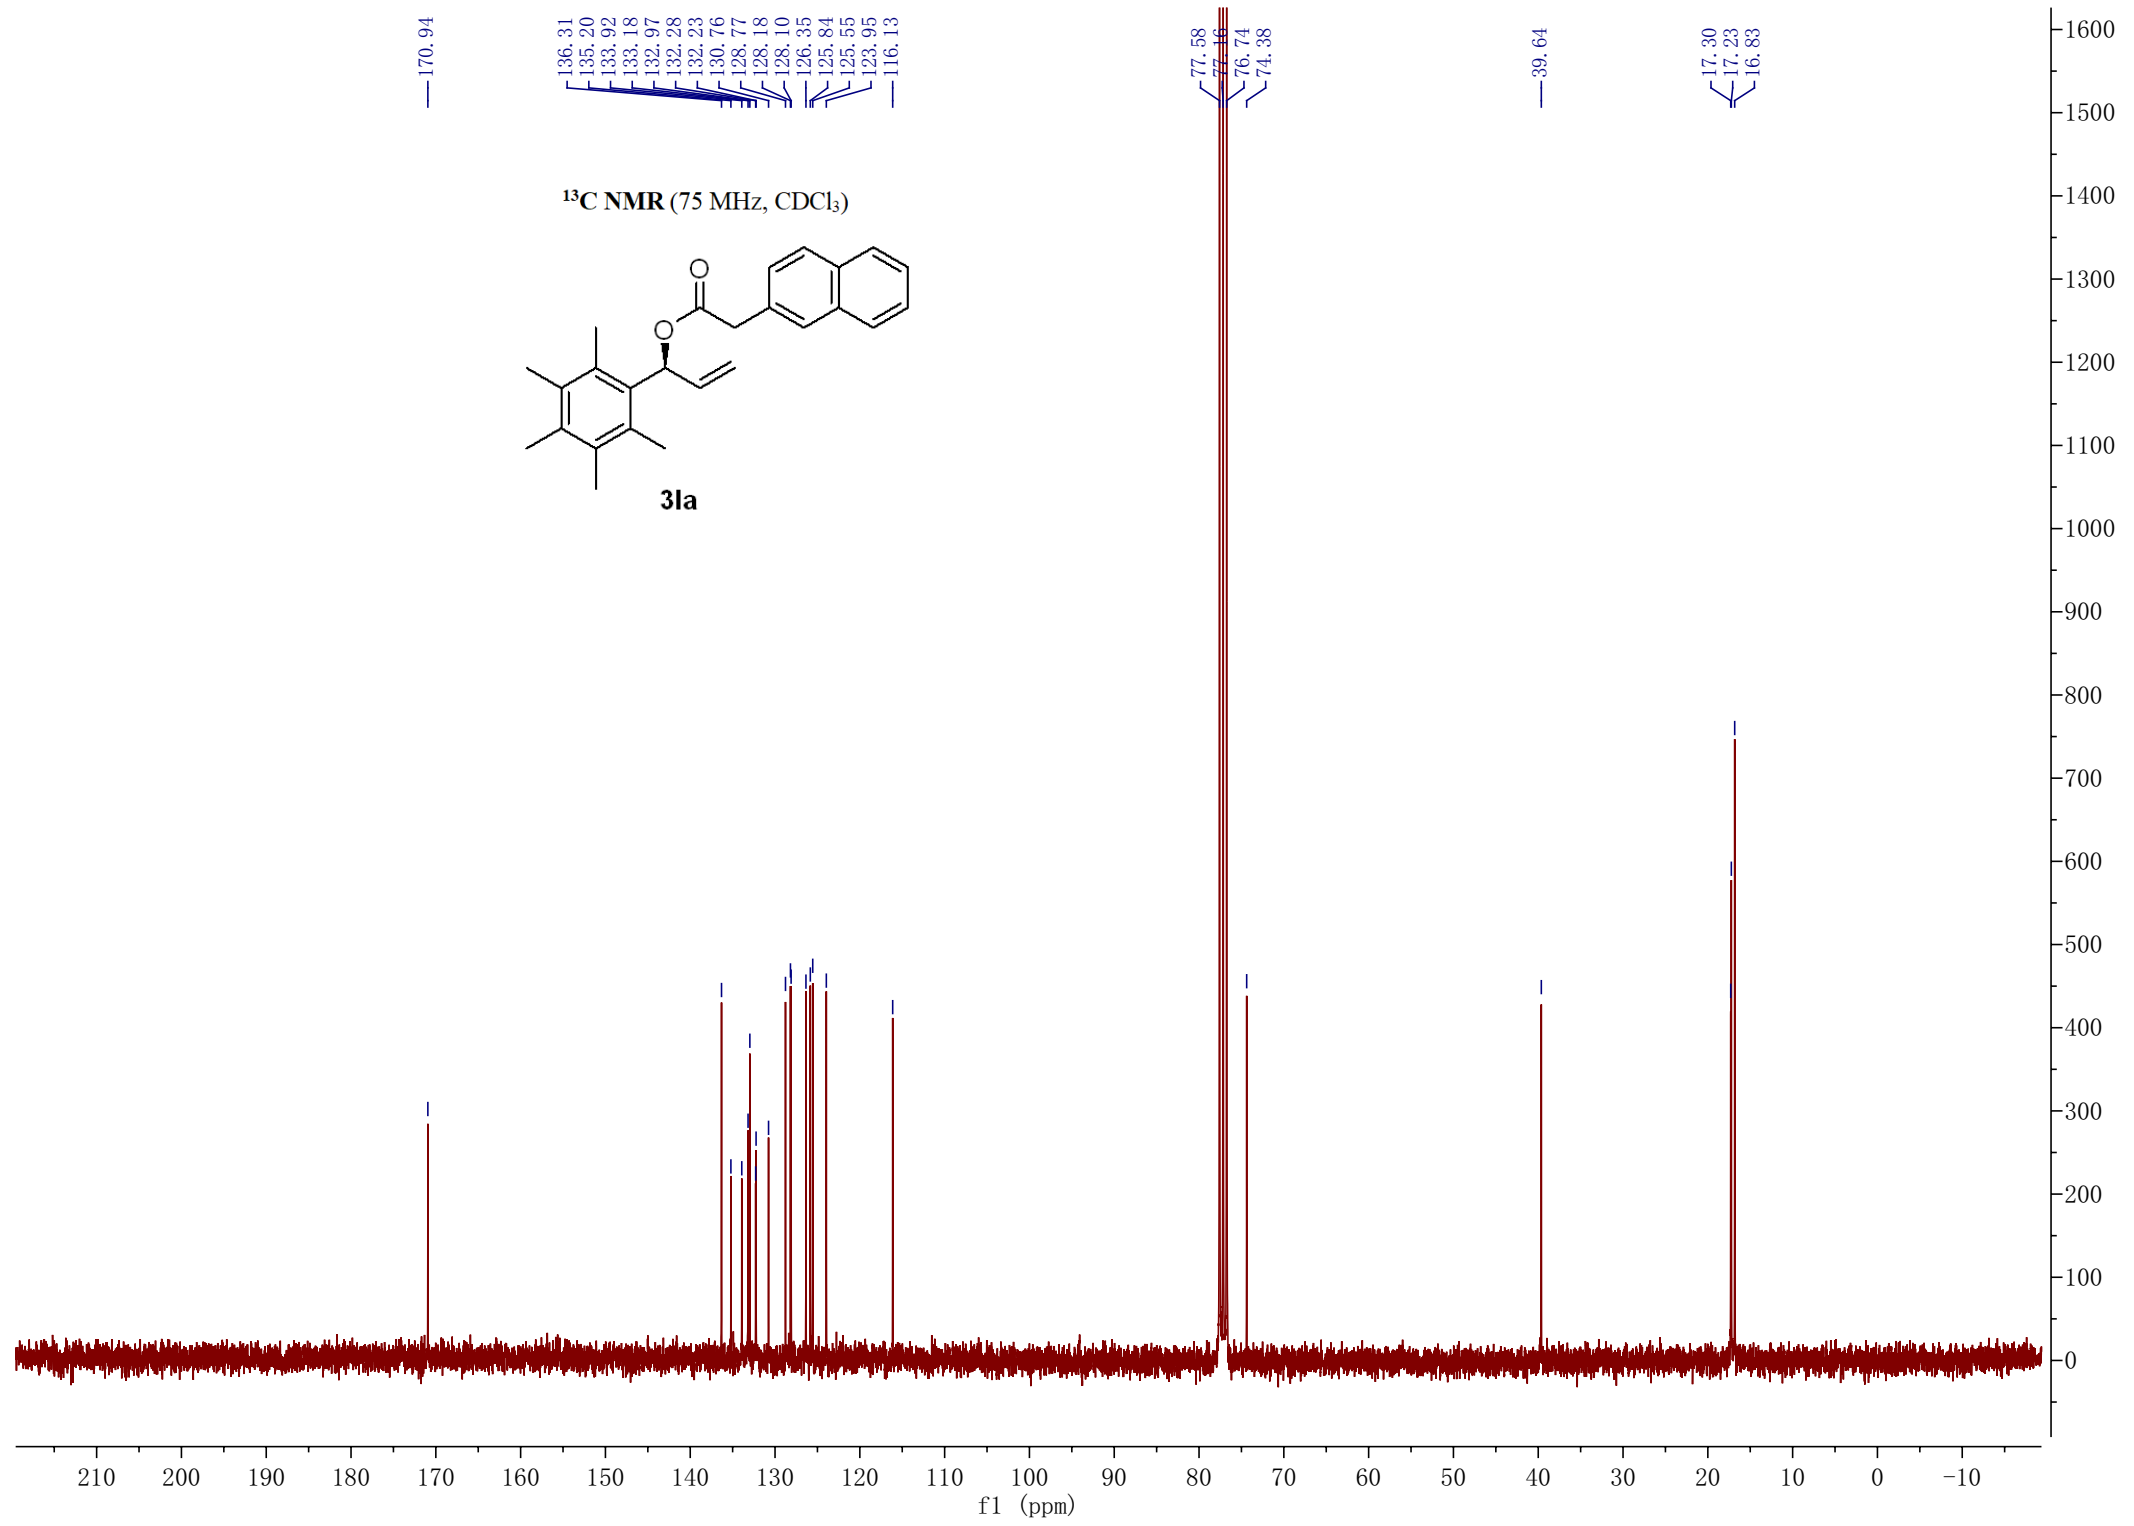

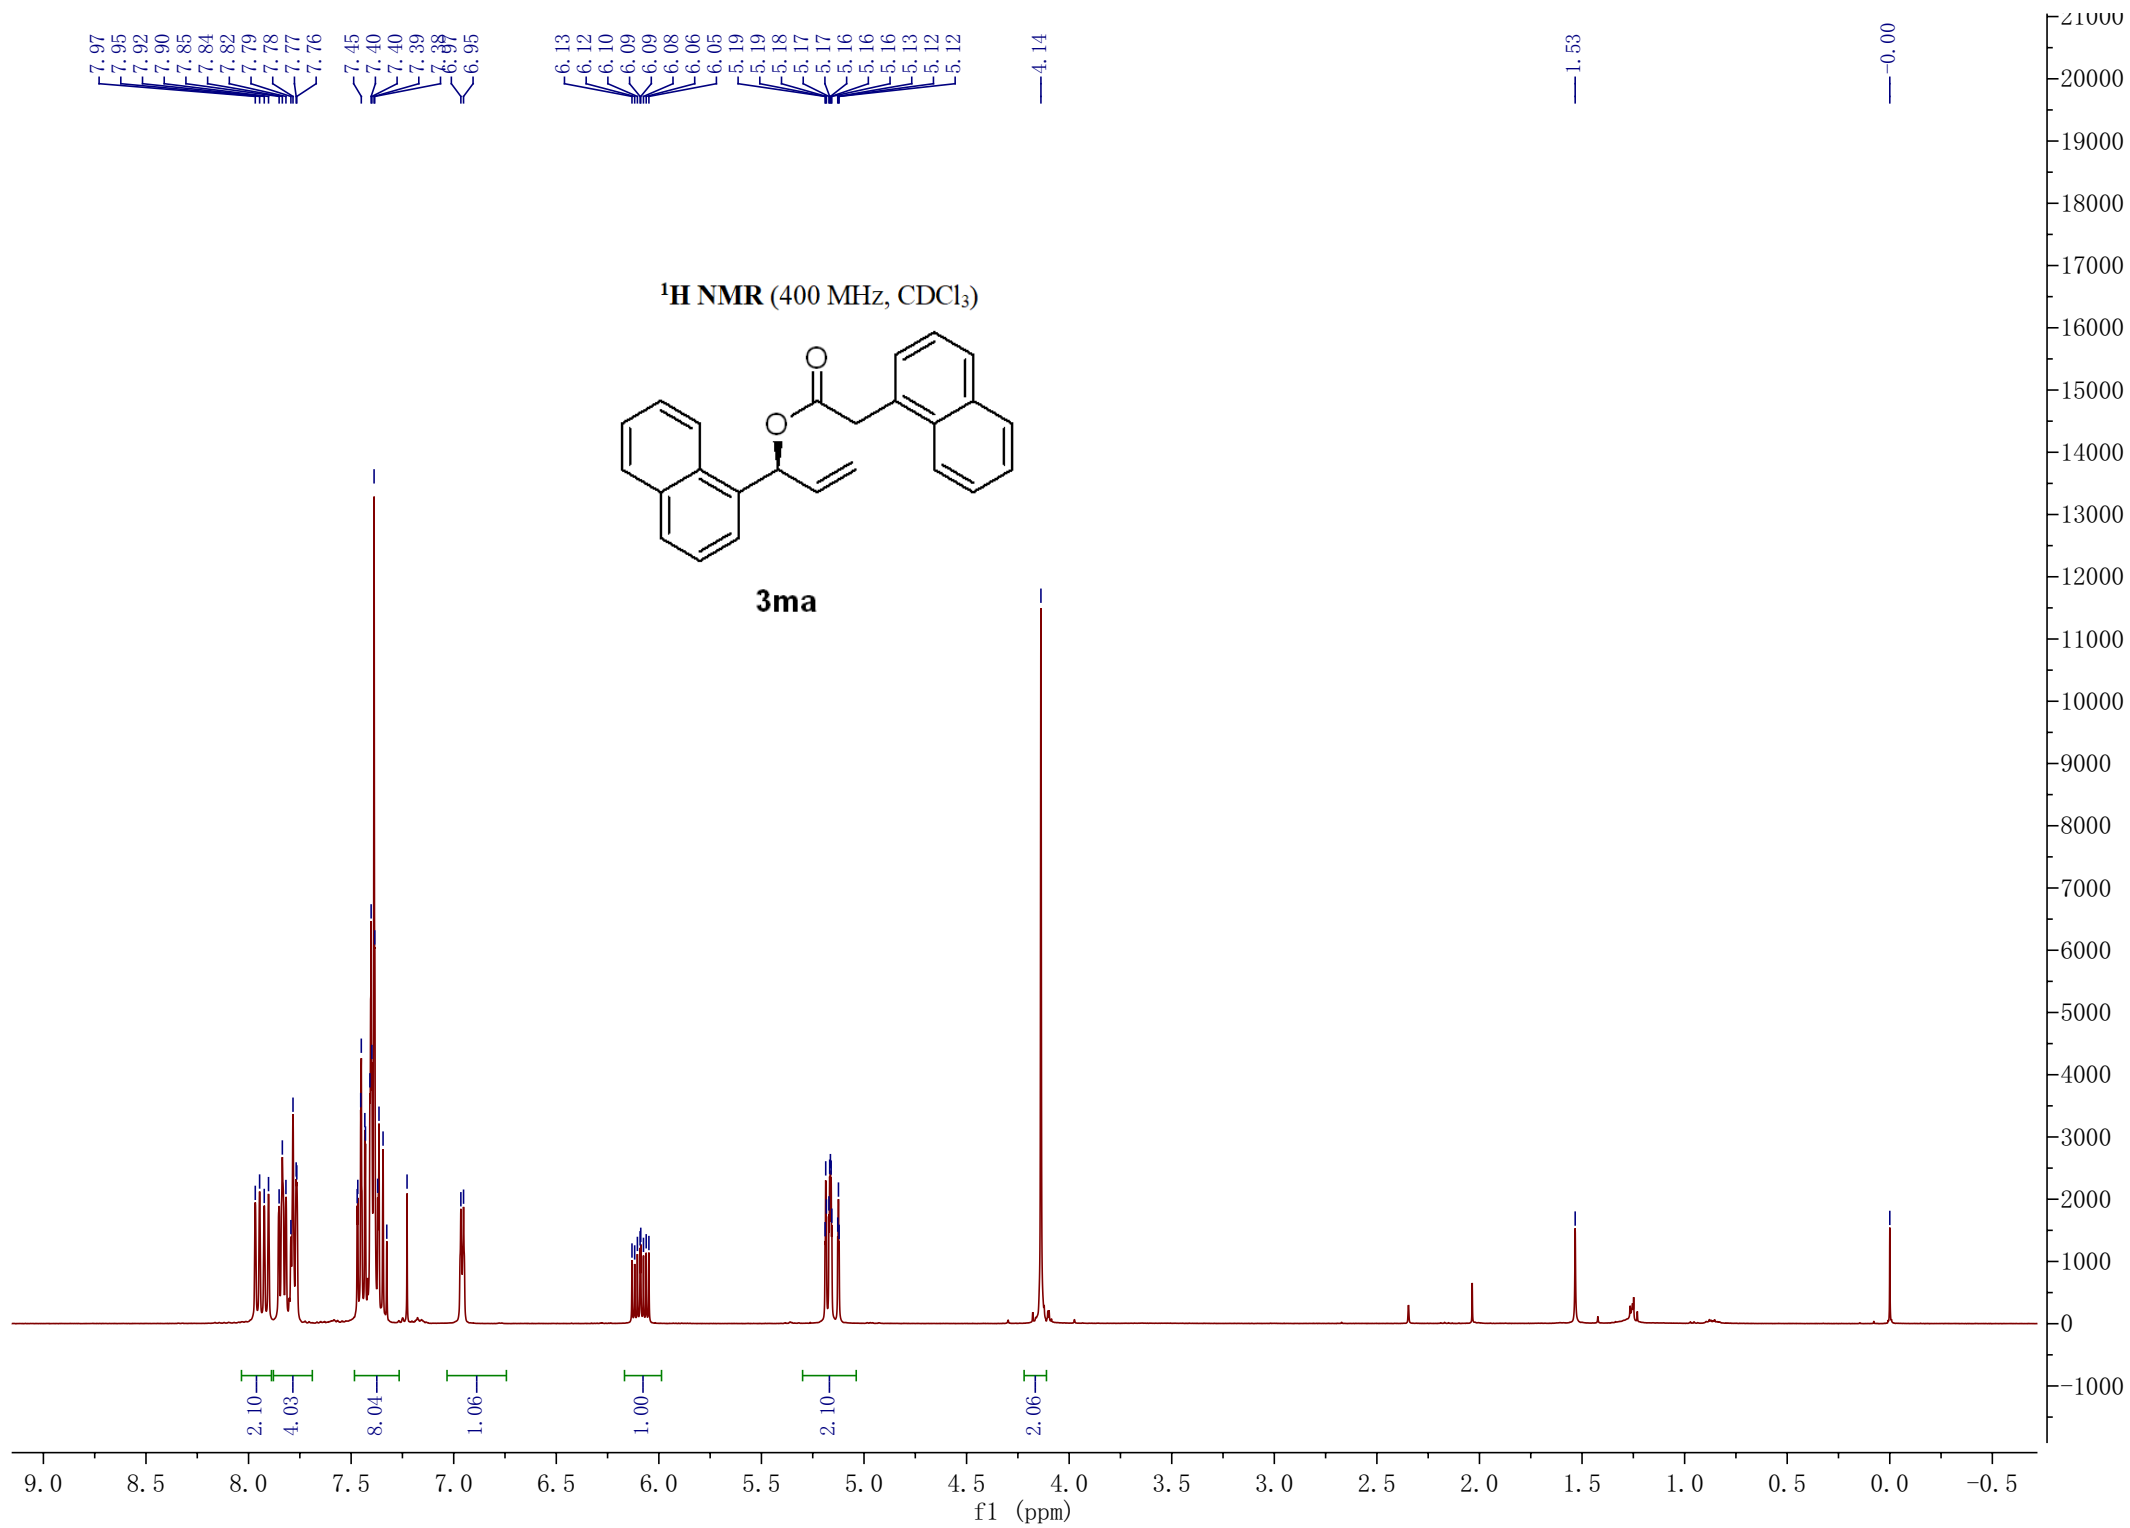



<sup>13</sup>C NMR (100 MHz, CDCl<sub>3</sub>)

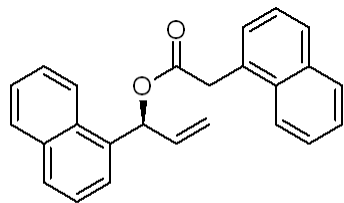

**3ma**

170.69  
135.76  
134.36  
134.00  
133.93  
132.20  
130.73  
130.54  
129.10  
128.85  
128.78  
128.22  
126.42  
126.33  
125.89  
125.82  
125.60  
125.56  
125.30  
123.98  
117.39

77.58  
77.16  
76.74  
74.52

39.55

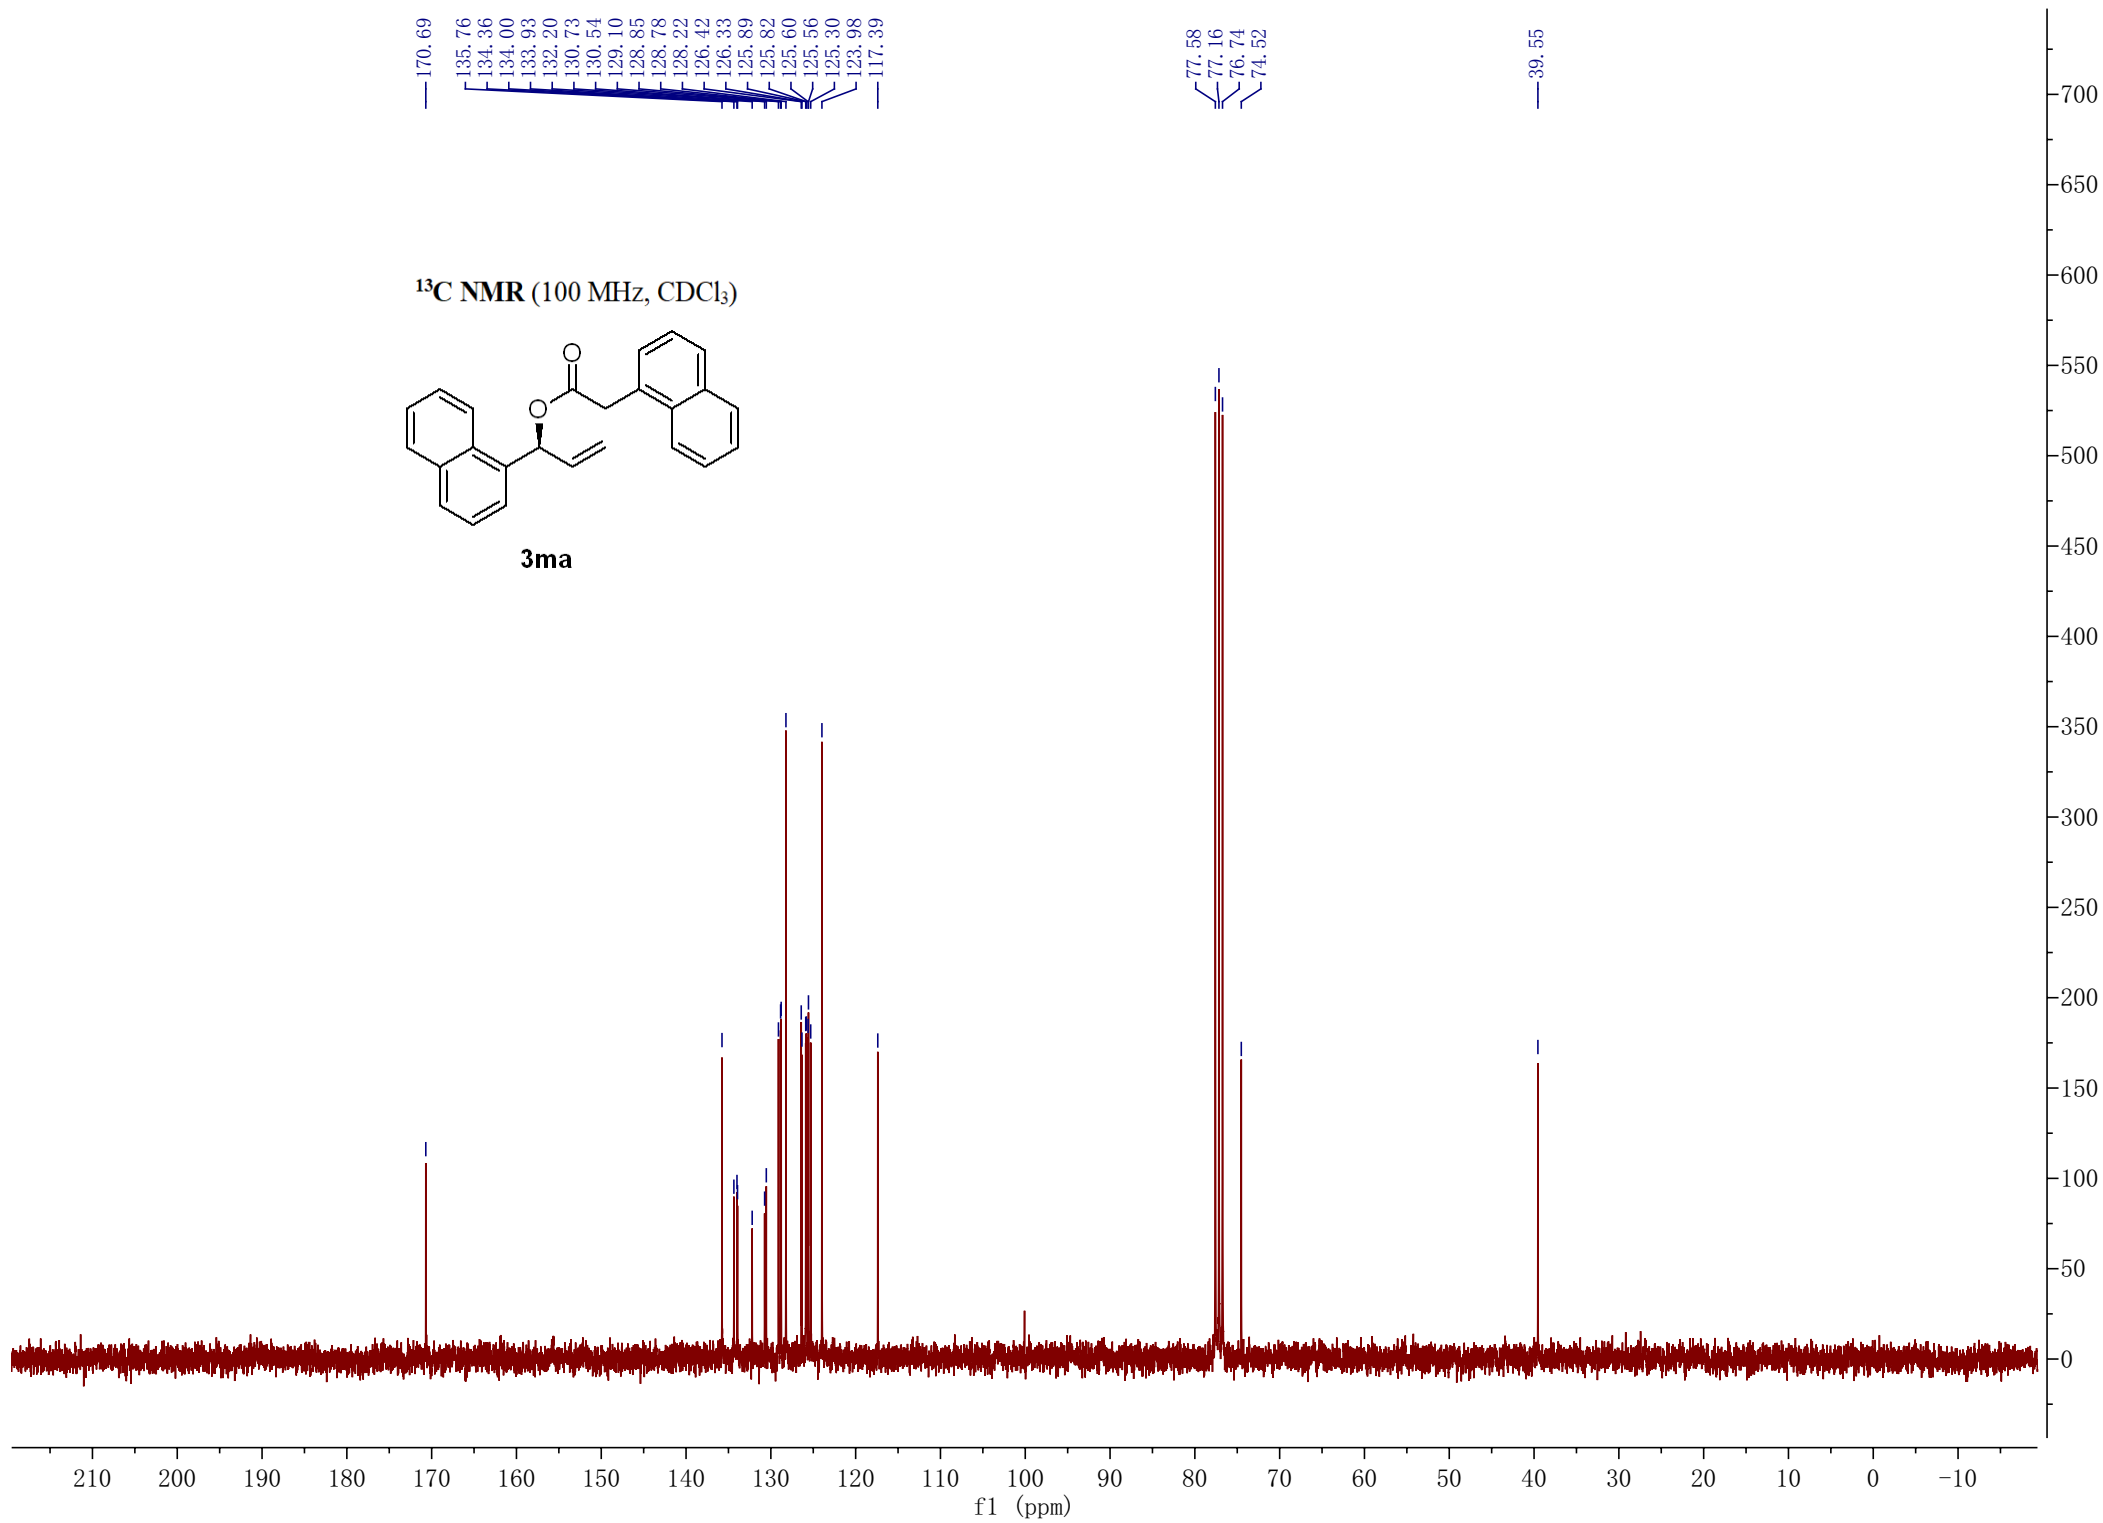

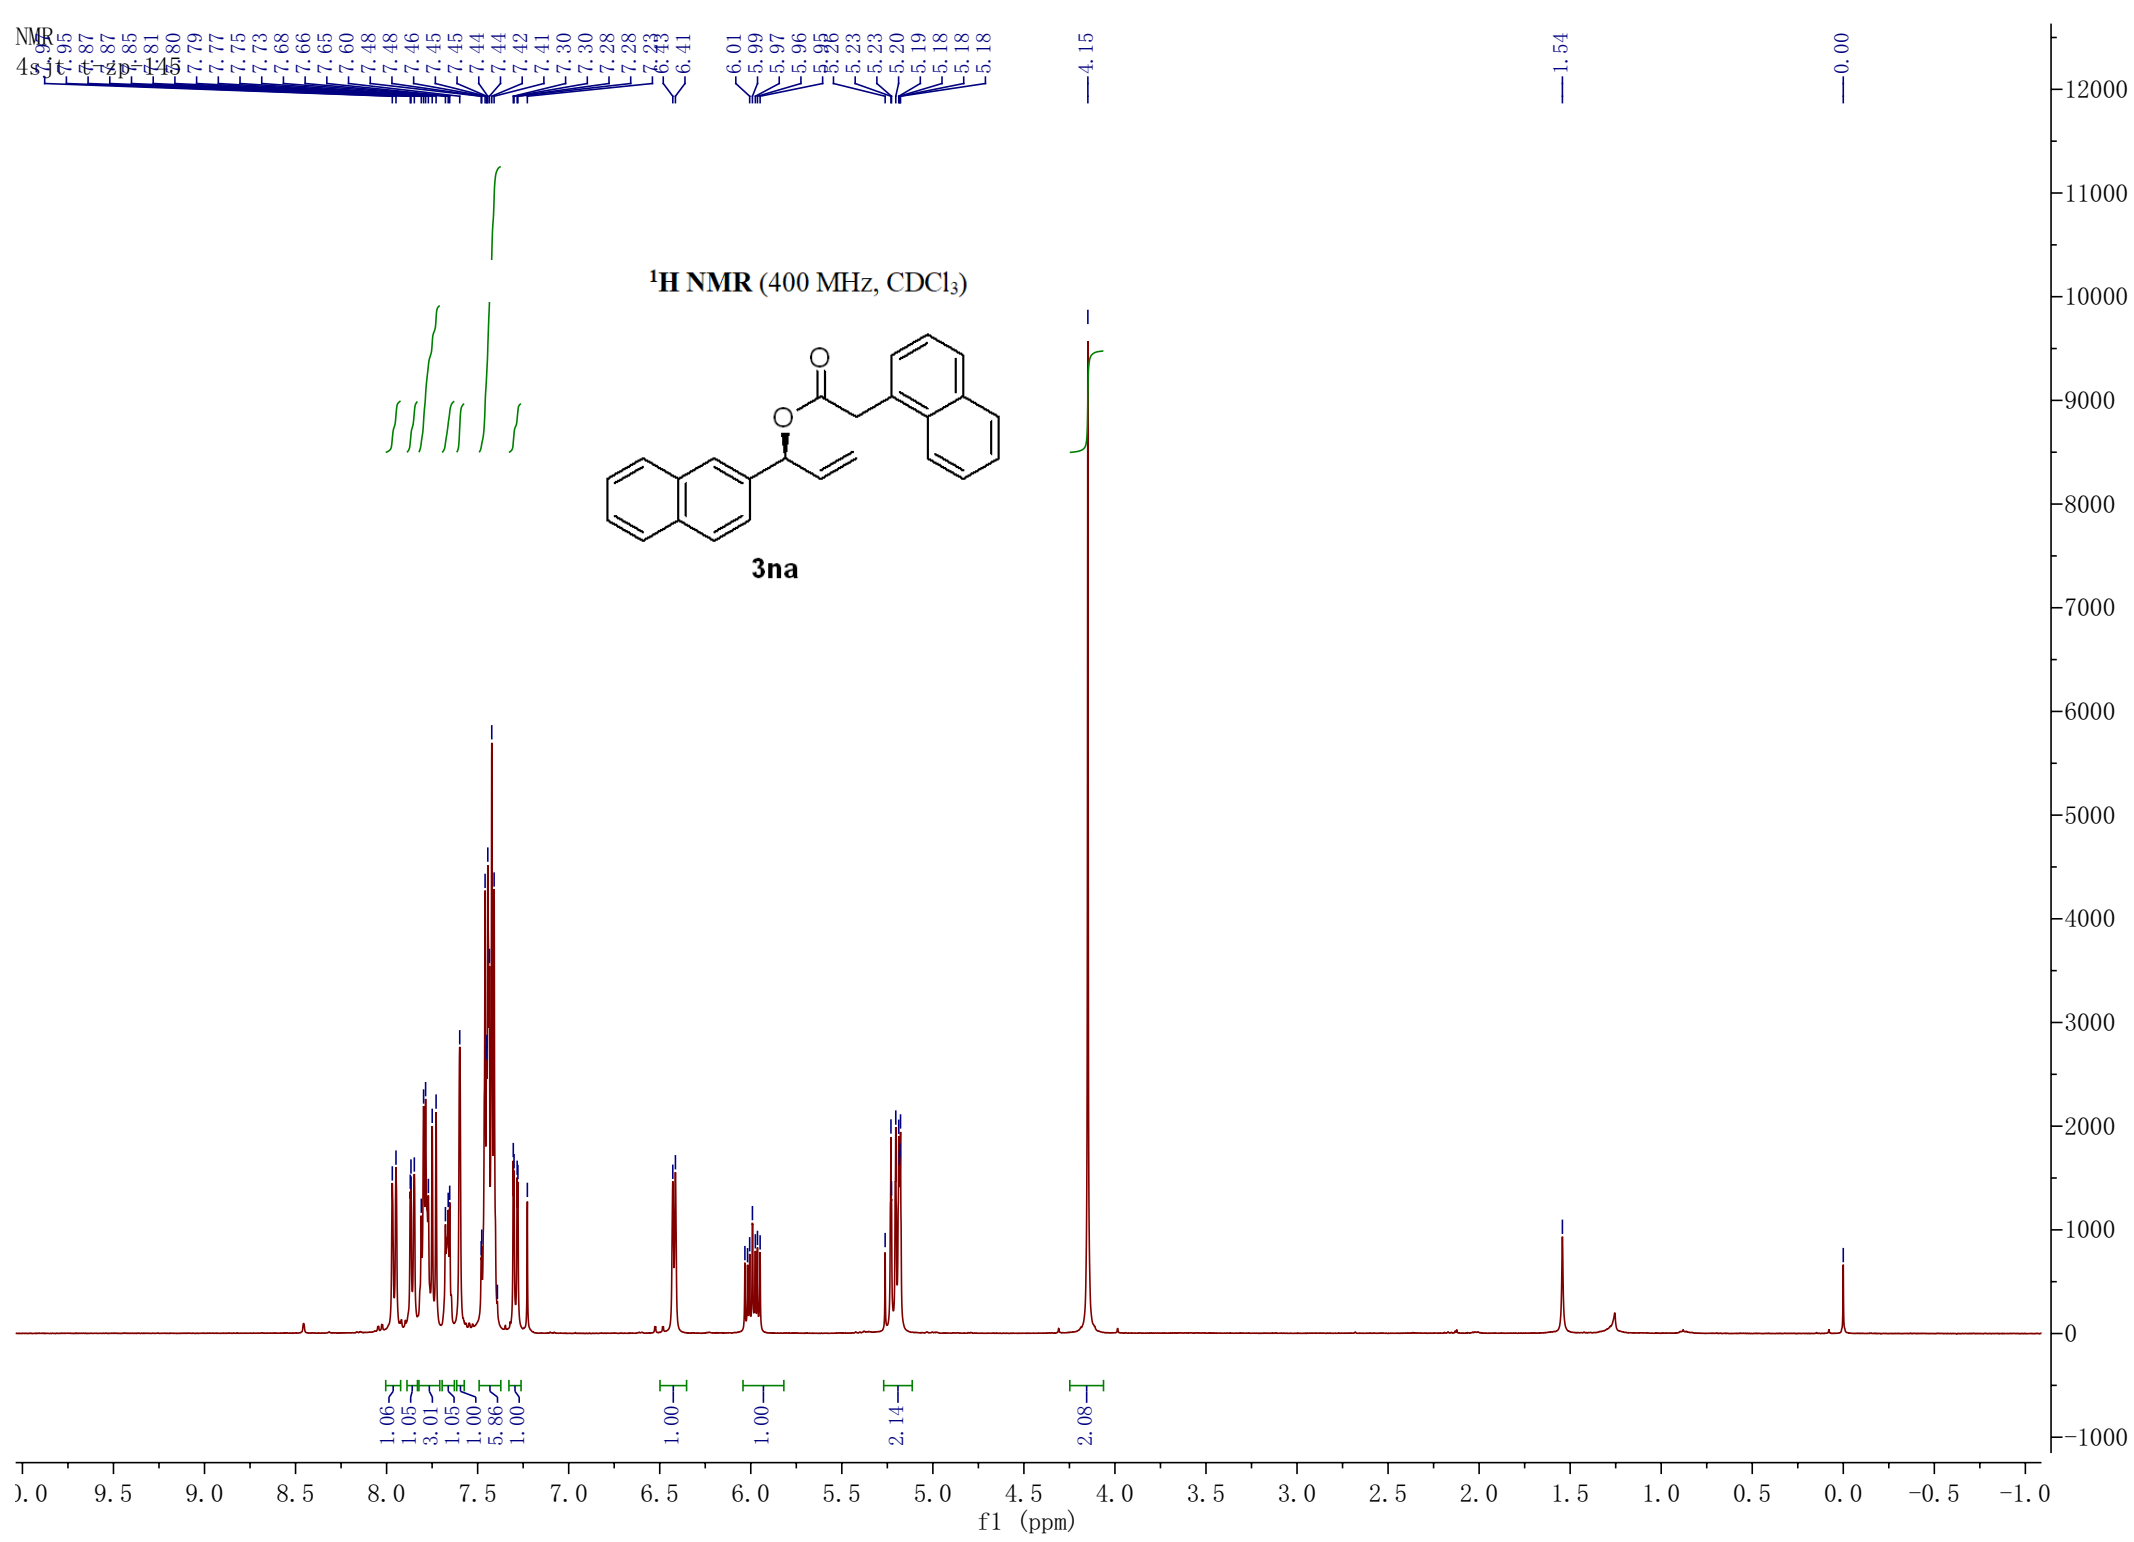

170.60  
136.12  
136.07  
133.94  
133.19  
133.15  
132.21  
130.60  
128.81  
128.36  
128.23  
128.19  
127.74  
126.46  
126.30  
126.13  
125.91  
125.60  
124.86  
123.99  
117.35

<sup>13</sup>C NMR (100 MHz, CDCl<sub>3</sub>)

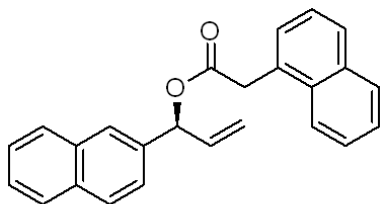

**3na**

77.48  
77.16  
76.84  
76.80

39.60

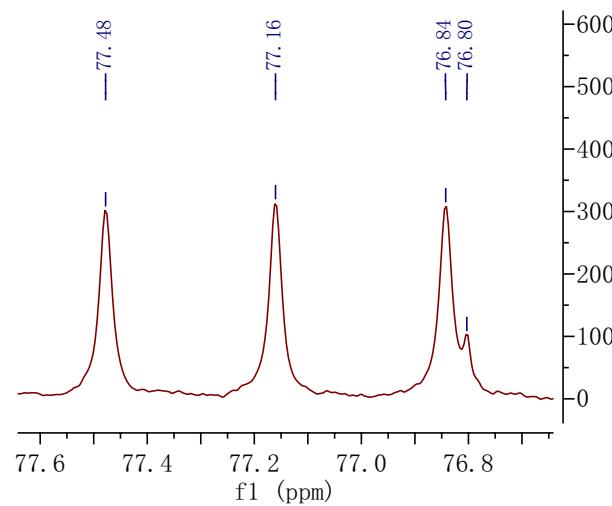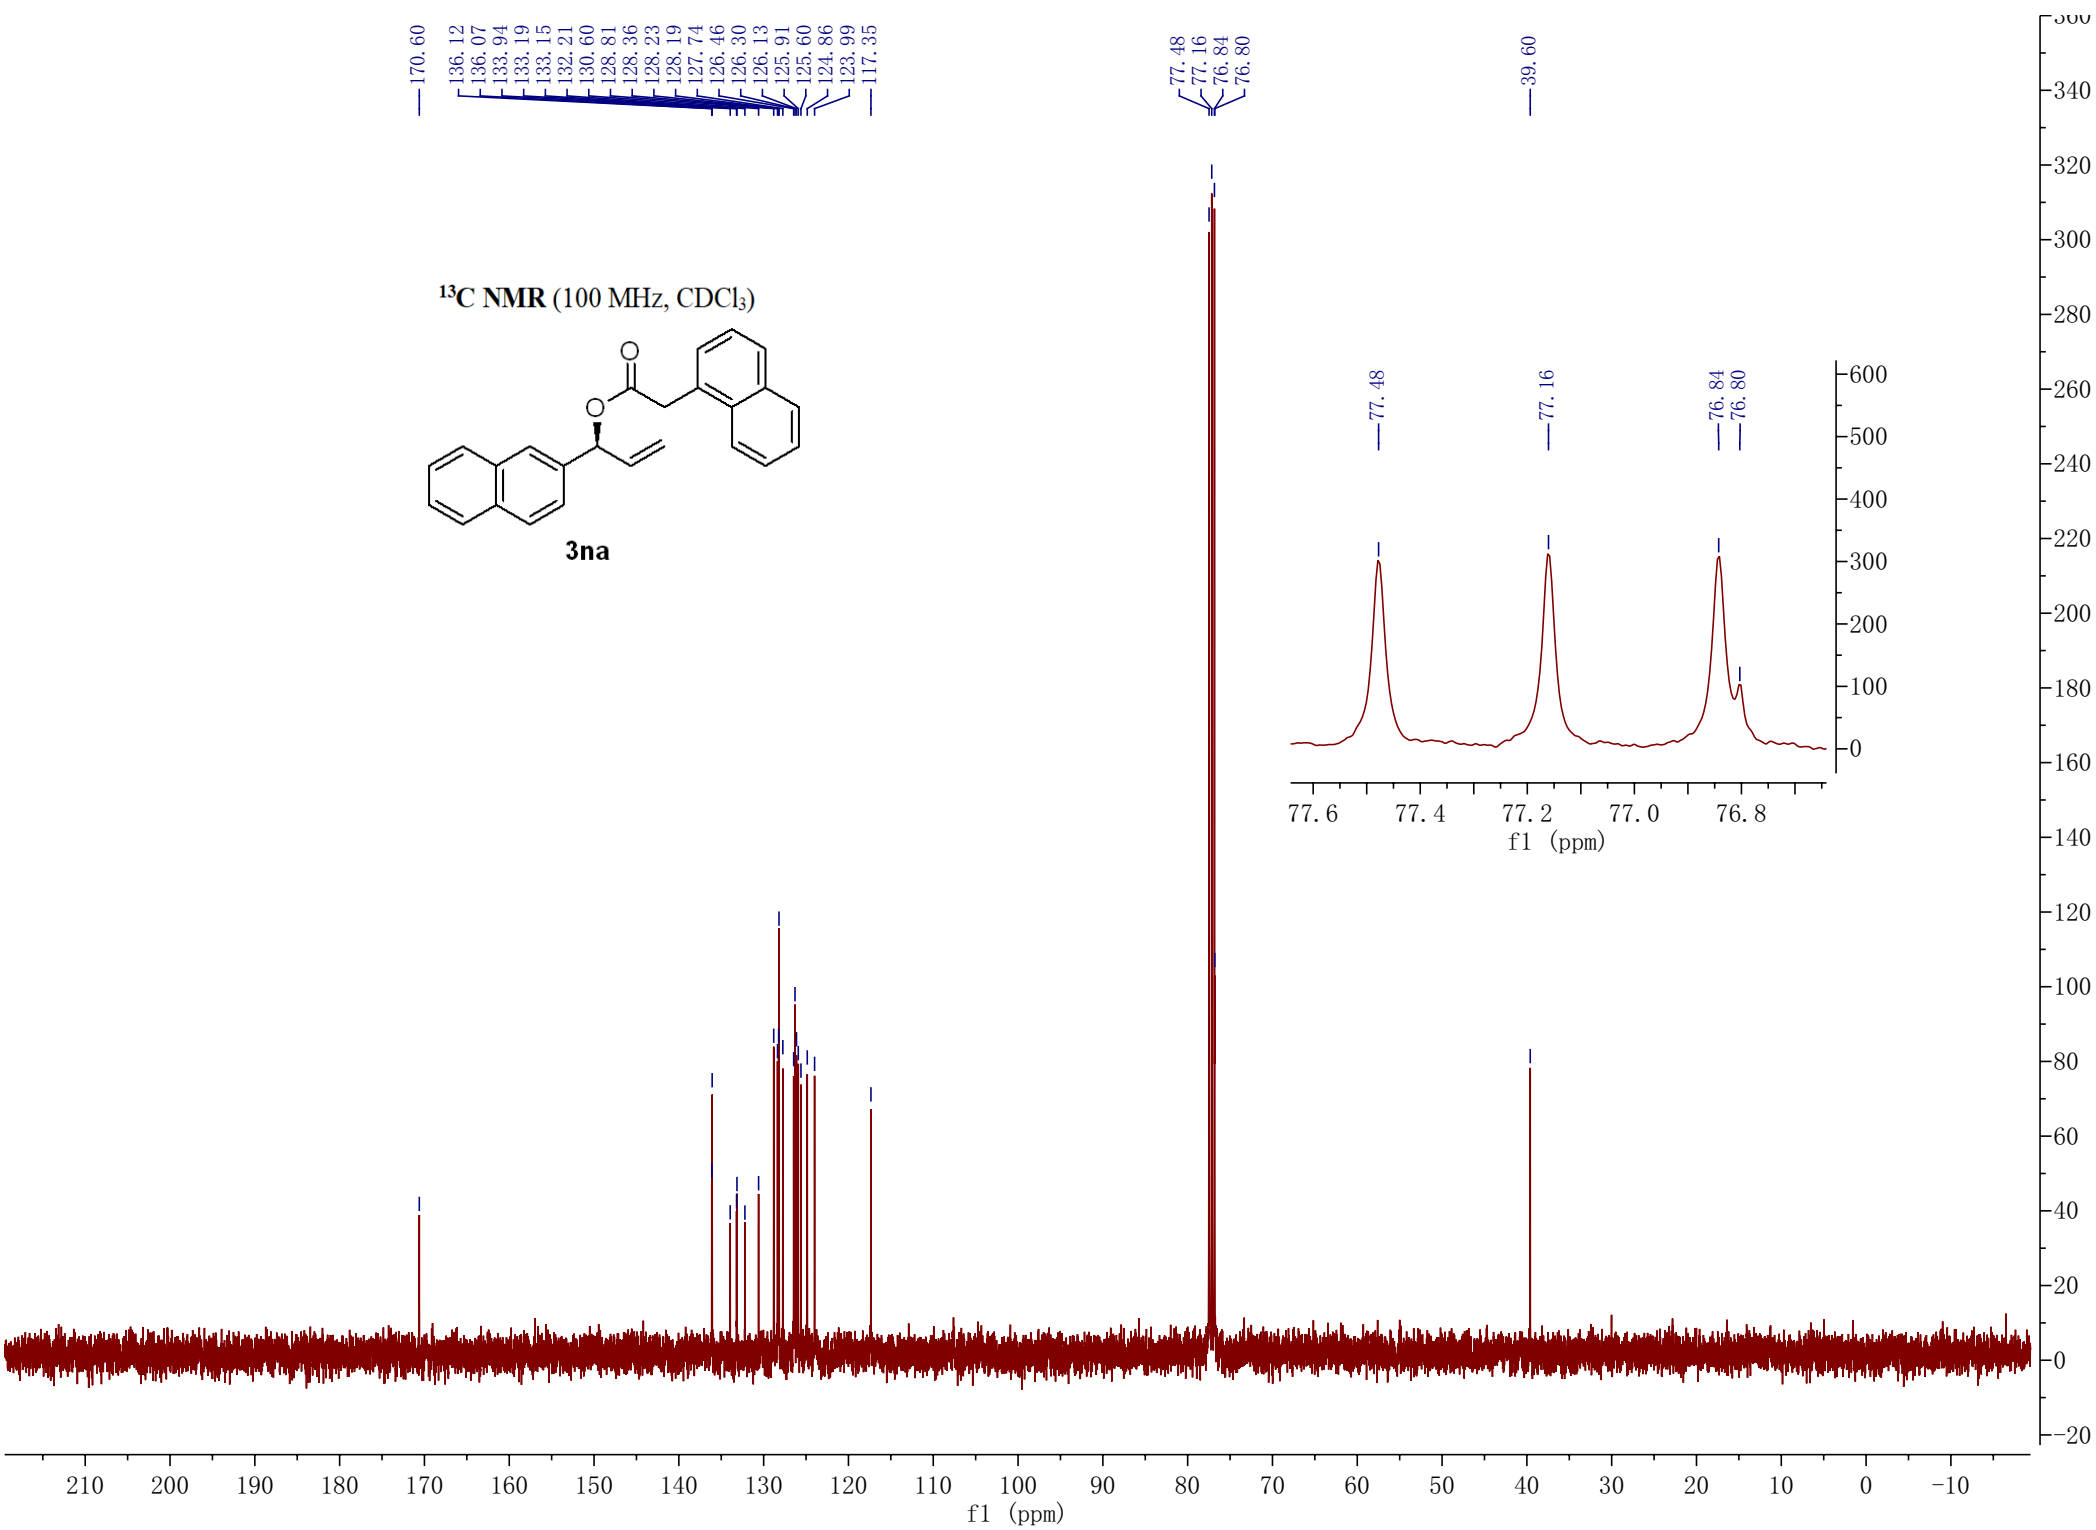

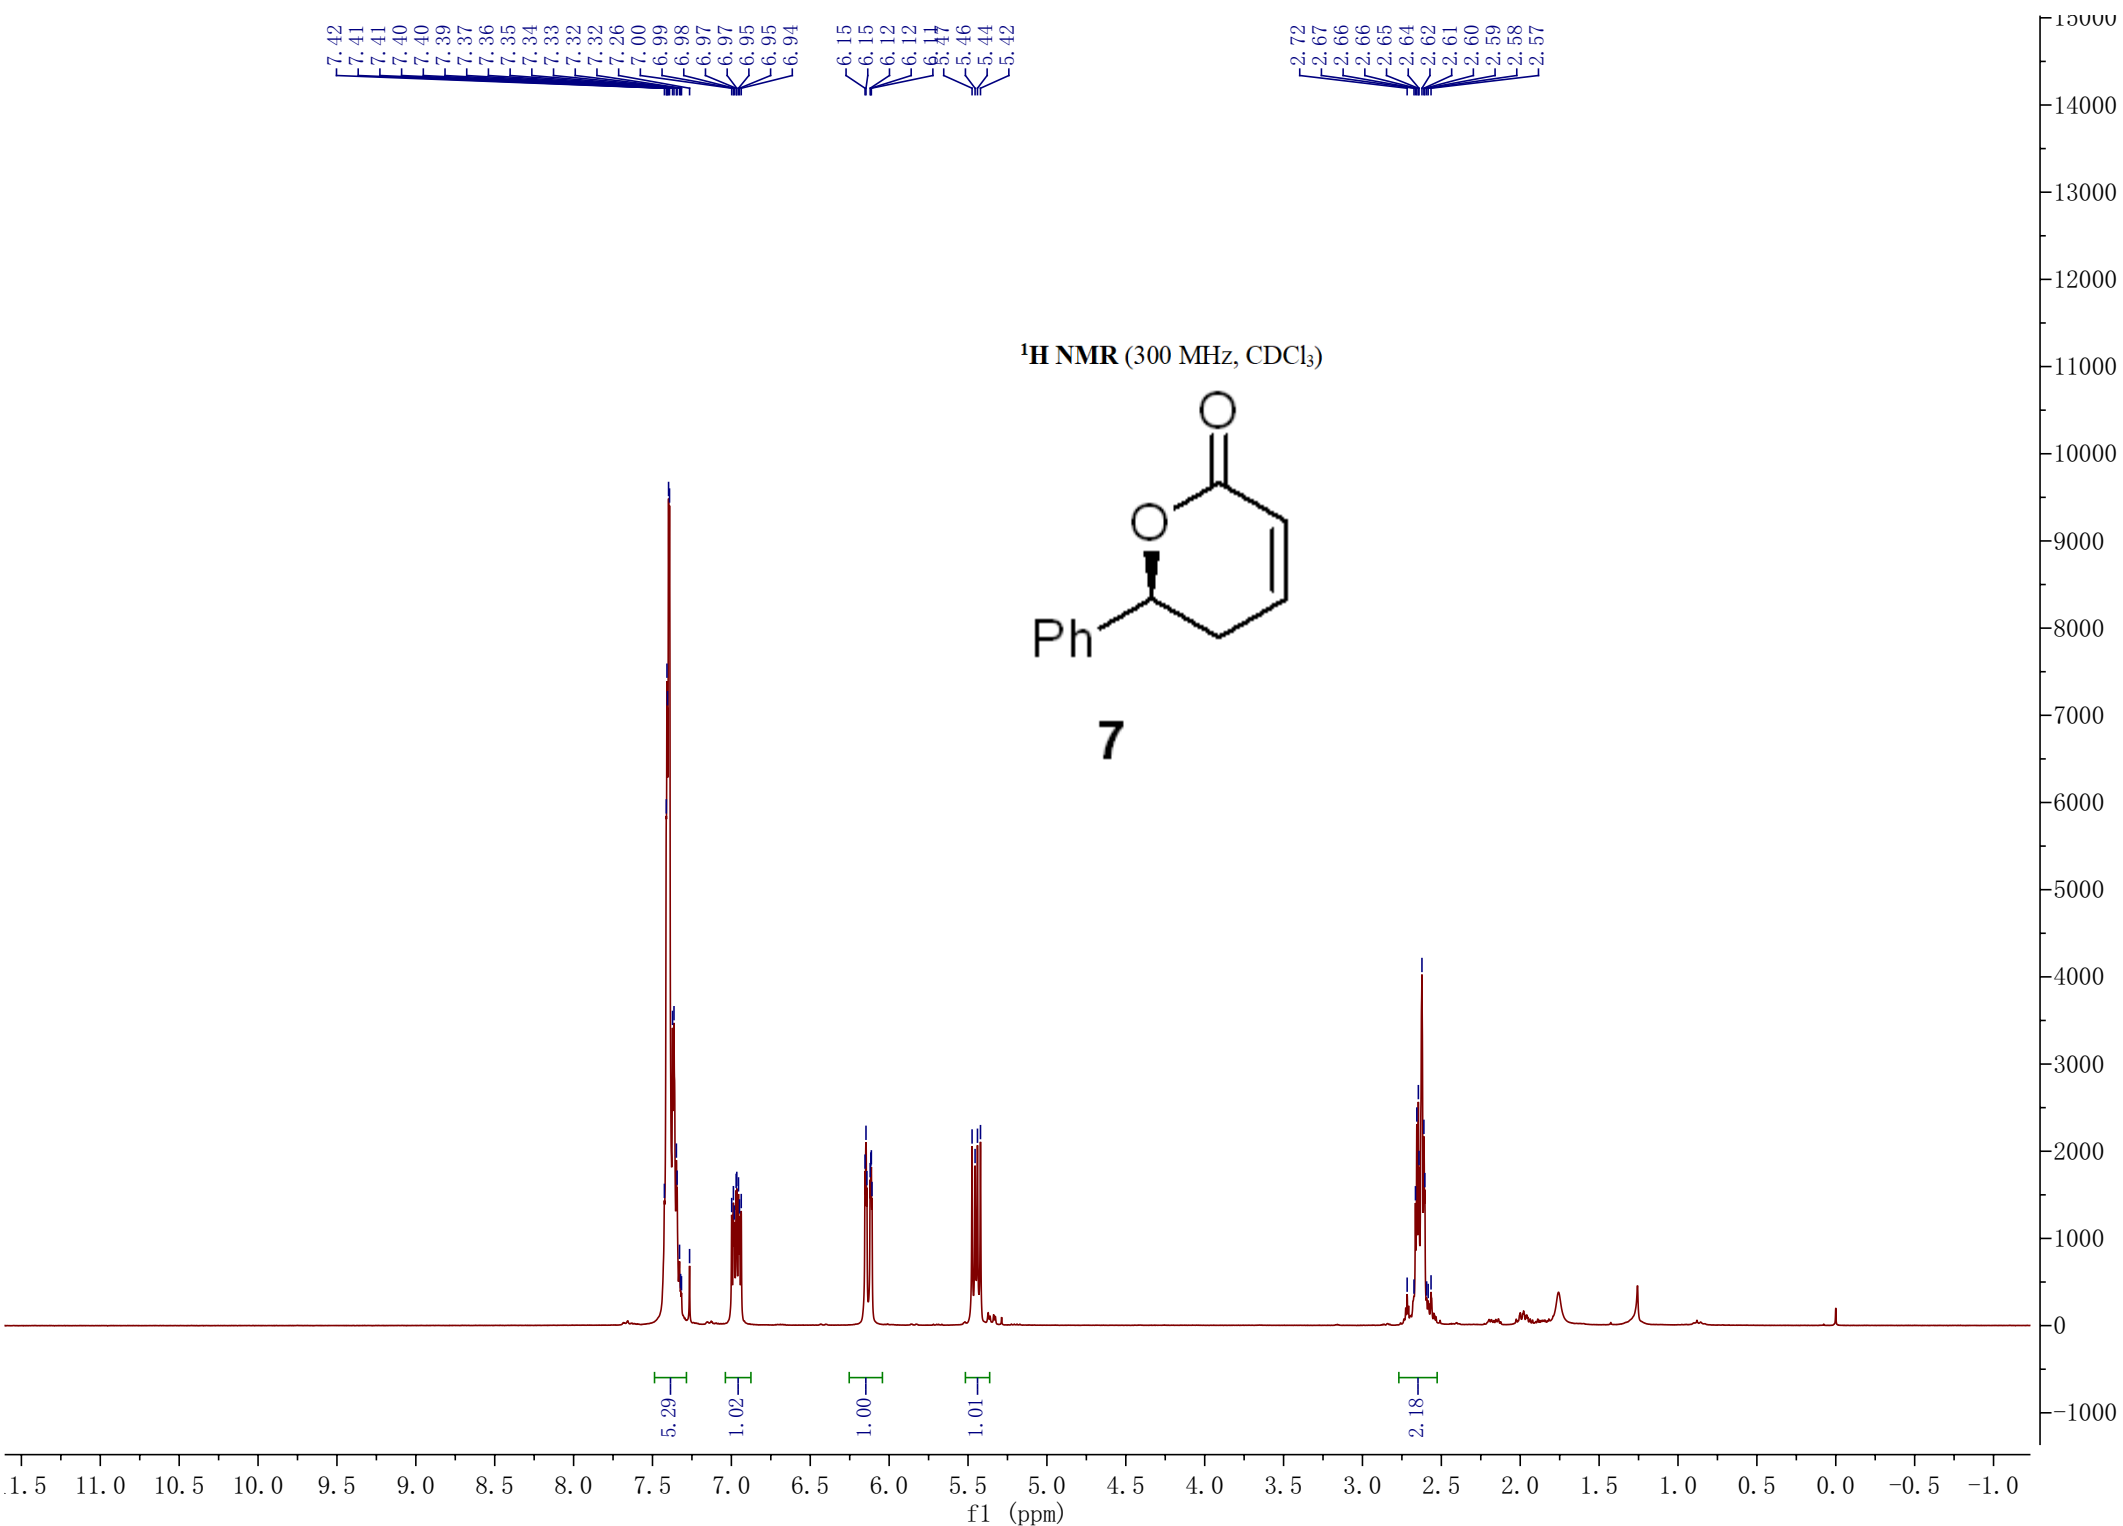

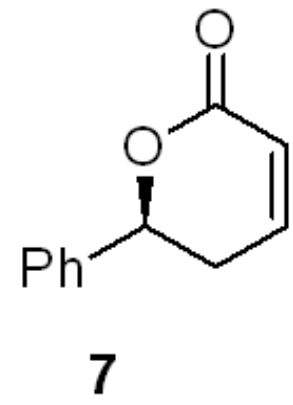

<sup>13</sup>C NMR (75 MHz, CDCl<sub>3</sub>)

- 164.23
- 145.02
- 138.57
- 128.80
- 128.76
- 126.17
- 121.85

- 79.38
- 77.48
- 77.16
- 76.84

- 31.82

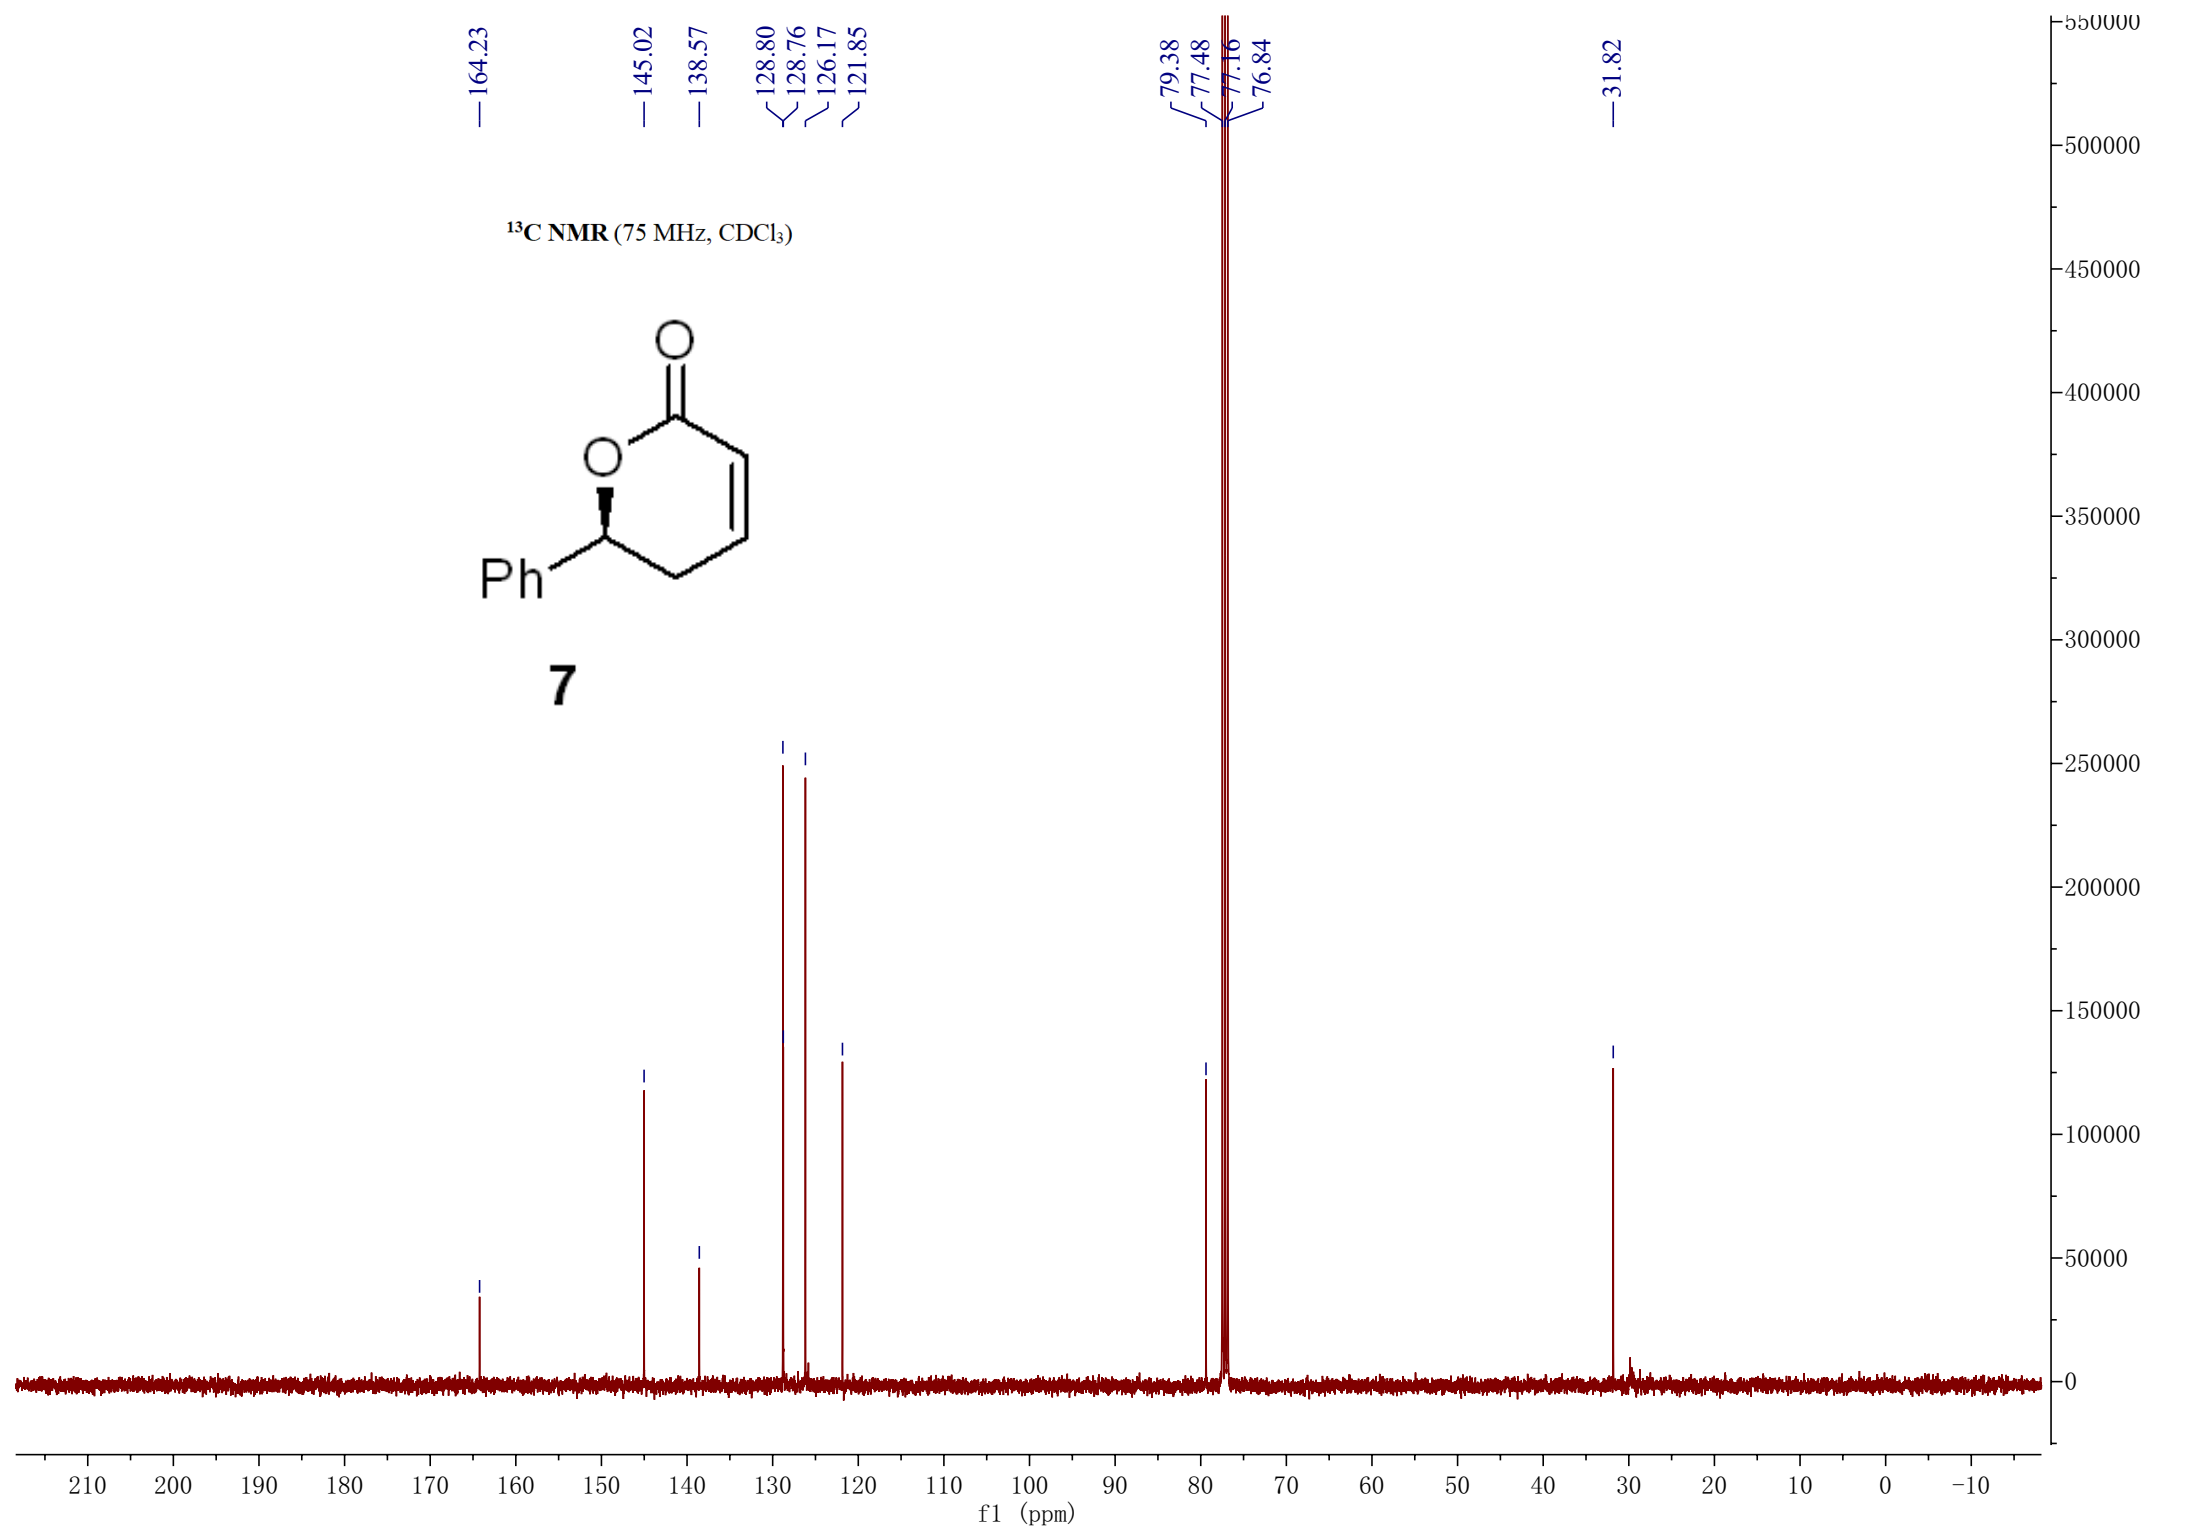

Supplement: d1cc04861a1.pdf [file d1cc04861a1.pdf]
